# Supplementary material for: Cross-Sectional Age Differences in Canine Personality Traits; Influence of Breed, Sex, Previous Trauma, and Dog Obedience Tasks
Source: Front Vet Sci. 2020 Jan 14;6:493. doi: 10.3389/fvets.2019.00493 (PMC6971055; doi:10.3389/fvets.2019.00493)
Supplement: Supplementary file 2 [file Data_Sheet_2.xlsx]

## Sheet: QUESTIONNAIRE
id	Health_status	Sex	Age_in_months	Age_group	Height	Weight	Breed	Neuter_status	Sensory_problems	Offleash_activity	Body_condition_score	Food	Vitamins	Trauma	Health_problems	Medication	Owner_gender	Owner_age	Owner_experience	Other_dogs_in_house	People_in_household	Child	Age_of_dog_when_arrived	get_dog	Where_dog_is_kept	Dog_obedience_tasks	Play	Commands	Dog_training_activities	Time_dog_spend_alone	Dog_beh_changed_3month	Dog is relaxed when greeting people [1]	Dog is relaxed when greeting people [1R]	Dog behaves aggressively toward dogs [2]	Dog is anxious [3]	Dog is lethargic [4]	Dog is lethargic [4R]	When off leash, dog comes immediately when called [5]	Dog is shy [6]	Dog behaves aggressively towards unfamiliar people [7]	Dog likes to chase squirrels, birds, or other small animals [8]	Dog gets bored in play quickly [9]	Dog gets bored in play quickly [9R]	Dog is quick to sneak out through open doors, gates [10]	Dog is quick to sneak out through open doors, gates [10R]	Dog is confident [11]	Dog is confident [11R]	Dog is dominant over other dogs [12]	Dog avoids other dogs [13]
dog2	0	2	139	5	43	9	2	1	0	5	1	4	1	1	4	0	2	3	2	1	4	1	1	2	2	2	1	1	1	1	0	4	2	1	4	1	5	5	3	2	1	1	5	2	4	2	4	2	1
dog3	1	2	128	5	50	15	1	1	0	5	3	4	3	0	0	0	1	4	2	0	2	0	2	3	2	3	4	1	2	4	0	1	5	1	1	1	5	2	1	1	4	1	5	1	5	5	1	1	1
dog4	0	2	111	4	53	35	1	2	0	3	2	1	3	0	2	0	2	1	3	1	3	0	3	3	3	3	4	1	3	1	0	4	2	2	1	1	5	3	1	1	3	4	2	1	5	5	1	4	3
dog5	0	2	164	6	55	20	1	1	0	5	3	1	2	0	3	0	2	2	2	2	3	0	2	3	2	1	3	2	2	1	0	4	2	1	3	3	3	2	1	1	2	3	3	3	3	3	3	2	2
dog6	0	2	147	6	46	14	2	2	0	2	1	5	2	0	3	0	2	3	1	2	2	1	2	2	3	4	1	2	1	3	1	5	1	1	1	1	5	5	1	1	1	1	5	1	5	5	1	1	3
dog7	0	1	102	4	50	35	2	2	0	2	2	1	1	0	2	0	2	3	2	1	4	1	3	2	3	1	2	1	2	2	0	4	2	1	2	3	3	5	4	1	4	3	3	1	5	2	4	1	1
dog8	1	2	99	4	32	5	2	2	0	3	3	1	4	0	0	0	2	2	1	2	2	0	2	2	3	4	3	3	3	2	0	2	4	1	1	1	5	5	1	1	2	1	5	1	5	5	1	2	1
dog9	0	2	122	5	55	33	2	2	0	2	2	1	4	0	4	0	2	2	2	2	4	0	1	2	2	4	3	2	1	4	0	5	1	1	1	2	4	5	1	1	2	4	2	1	5	4	2	1	1
dog10	1	2	69	2	40	11	2	2	0	2	3	1	1	0	0	0	2	2	2	2	4	0	2	2	2	4	2	2	2	4	0	3	3	1	4	1	5	5	4	1	1	1	5	1	5	2	4	1	1
dog11	0	2	151	6	61	29	1	2	0	5	1	4	2	0	1	0	2	2	1	2	4	1	1	2	2	4	2	3	2	1	0	3	3	5	3	3	3	1	1	1	2	3	3	2	4	5	1	5	2
dog12	1	2	97	4	43	18	2	2	0	5	3	1	4	0	0	1	1	4	3	1	2	0	2	2	2	4	3	3	3	1	0	3	3	1	2	1	5	5	4	2	4	4	2	4	2	4	2	1	1
dog13	0	2	138	5	40	20	1	2	0	1	3	1	3	1	4	0	2	4	3	0	1	0	3	1	3	4	2	1	2	3	1	4	2	4	1	2	4	4	3	3	4	4	2	1	5	2	4	3	3
dog15	1	1	42	2	72	40	2	2	0	5	3	3	4	0	0	0	2	4	3	0	2	0	2	2	1	2	3	2	2	3	0	3	3	2	1	1	5	2	1	2	4	1	5	2	4	4	2	1	2
dog16	1	1	63	2	54	40	2	2	0	1	3	1	3	1	0	0	2	1	1	2	2	0	2	2	1	4	2	2	3	2	0	4	2	1	1	1	5	4	3	3	3	3	3	1	5	4	2	3	3
dog17	1	2	41	2	53	22	2	2	0	3	3	3	2	0	0	0	2	2	1	0	4	0	2	2	3	4	3	3	2	2	0	4	2	2	1	1	5	5	2	1	4	1	5	1	5	4	2	4	2
dog18	0	2	99	4	45	15	1	2	0	4	3	2	2	1	2	0	2	1	3	1	4	0	2	1	1	4	3	2	2	1	0	1	5	4	2	1	5	5	2	5	2	3	3	1	5	5	1	5	3
dog19	0	2	56	2	59	21	2	1	0	5	3	4	1	0	3	1	2	3	2	1	2	0	2	2	3	4	3	3	3	2	0	1	5	2	4	1	5	5	2	1	2	1	5	1	5	2	4	3	1
dog20	1	2	133	5	59	30	2	1	0	2	3	1	1	0	0	0	2	4	3	2	3	1	2	2	3	4	2	2	3	2	0	5	1	1	1	2	4	5	1	1	3	3	3	3	3	5	1	3	3
dog21	1	1	67	2	50	15	1	2	0	5	3	5	1	1	0	0	2	4	1	1	2	0	1	3	2	3	2	1	2	2	0	3	3	2	2	1	5	5	3	2	4	3	3	5	1	4	2	2	3
dog22	0	2	59	2	40	20	2	2	1	5	1	4	2	1	4	0	2	1	1	2	4	1	2	2	2	4	3	2	2	3	0	5	1	4	3	1	5	1	1	1	3	3	3	1	5	3	3	3	1
dog23	0	1	133	5	40	19	2	2	1	2	2	2	4	0	4	1	2	2	2	1	1	0	4	3	3	4	3	1	3	3	1	2	4	1	1	1	5	4	1	1	3	5	1	1	5	4	2	1	1
dog24	0	2	132	5	40	35	1	2	0	2	2	3	1	0	1	0	2	3	2	2	2	0	4	3	3	1	2	1	1	3	0	3	3	3	3	1	5	5	1	3	2	5	1	1	5	5	1	5	1
dog25	1	2	127	5	40	10	1	2	0	2	1	1	1	1	0	0	2	1	3	1	4	1	4	3	3	4	3	3	3	3	0	5	1	1	1	3	3	3	1	1	1	5	1	1	5	4	2	2	4
dog26	0	1	124	5	42	20	2	1	0	3	3	4	2	0	1	0	2	4	2	0	4	0	2	2	3	3	3	3	3	3	0	5	1	1	1	1	5	4	1	1	3	3	3	1	5	5	1	2	4
dog27	0	2	124	5	40	19	2	2	0	3	3	1	3	0	3	0	2	3	1	2	4	1	4	3	3	4	2	3	2	1	0	5	1	1	2	1	5	5	1	1	4	3	3	1	5	3	3	1	3
dog28	0	2	139	5	48	14	2	2	1	3	3	1	2	1	2	0	2	1	1	1	3	0	2	2	3	4	3	3	3	3	1	3	3	1	2	2	4	3	1	1	3	2	4	2	4	4	2	1	3
dog29	1	2	124	5	70	55	2	1	0	3	2	4	1	0	0	0	1	1	2	0	4	0	1	2	2	4	3	2	1	2	0	2	4	1	1	2	4	4	3	1	3	4	2	1	5	4	2	1	3
dog30	0	1	96	4	60	42	1	2	0	2	3	1	1	0	3	0	2	4	1	1	3	0	4	1	3	4	2	2	2	2	1	3	3	1	1	1	5	2	1	1	3	2	4	1	5	1	5	3	3
dog31	1	2	69	2	67	27	2	1	0	3	3	1	1	0	0	0	2	1	1	2	2	0	2	2	3	4	3	3	3	3	0	5	1	2	1	1	5	5	2	1	1	2	4	1	5	4	2	4	4
dog32	0	1	153	6	60	31	1	1	1	2	3	5	4	0	3	1	2	3	2	2	4	1	1	2	1	2	2	1	1	2	0	4	2	1	1	3	3	3	1	1	1	1	5	1	5	5	1	1	1
dog33	0	2	99	4	62	28	1	2	0	3	1	3	2	1	3	0	1	4	2	0	3	0	4	1	3	3	3	2	3	3	0	5	1	3	1	1	5	4	1	2	5	1	5	1	5	5	1	5	1
dog34	0	2	172	6	20	7	1	2	1	1	2	4	1	0	4	0	2	1	2	0	4	0	1	2	3	2	2	1	1	1	0	1	5	1	2	3	3	5	4	1	4	4	2	1	5	1	5	1	4
dog35	0	2	115	4	40	18	2	2	1	3	2	4	1	0	2	0	2	1	2	0	3	0	3	2	3	1	1	1	2	3	1	3	3	5	3	4	2	1	1	1	3	4	2	2	4	3	3	5	3
dog36	0	2	159	6	50	40	2	2	1	5	3	2	3	0	3	1	2	2	2	2	4	0	3	2	3	4	4	2	1	2	1	5	1	1	1	2	4	5	1	1	2	3	3	3	3	4	2	2	1
dog37	0	2	132	5	40	27	1	2	0	2	3	4	1	0	1	0	2	4	2	0	1	0	3	1	1	4	2	2	1	3	0	5	1	1	1	1	5	5	4	5	5	3	3	4	2	5	1	4
dog38	0	2	204	6	43	18	1	2	1	3	1	4	2	1	3	0	2	4	2	0	2	0	4	1	1	4	4	2	1	2	1	5	1	1	3	5	1	3	4	1	1	5	1	5	1	2	4	1	2
dog39	0	2	109	4	39	17	2	2	0	4	3	5	4	0	3	0	2	2	1	2	2	0	2	2	3	4	4	2	3	1	0	1	5	5	1	1	5	5	1	4	5	1	5	1	5	5	1	5	1
dog40	1	2	84	3	50	20	1	2	0	5	1	1	2	1	0	0	2	1	2	1	3	0	1	3	2	4	2	2	2	4	0	5	1	2	4	1	5	4	2	1	4	3	3	1	5	2	4	1	2
dog41	0	2	145	6	29	7	1	2	0	2	3	1	2	1	1	0	2	1	1	2	2	0	4	1	3	4	1	2	3	3	1	3	3	4	3	1	5	4	1	3	4	2	4	1	5	5	1	1	3
dog43	1	2	134	5	64	28	2	2	0	1	3	5	3	0	0	1	2	4	3	1	2	0	4	2	1	4	4	2	2	1	0	5	1	1	1	3	3	5	1	1	1	5	1	1	5	3	3	3	3
dog44	1	1	92	3	45	30	1	1	0	5	3	1	3	0	0	0	2	2	1	1	2	0	1	3	2	4	2	1	2	4	0	1	5	1	1	1	5	4	1	3	4	2	4	1	5	4	2	3	1
dog45	0	1	218	6	35	16	1	2	1	2	2	4	4	1	3	1	2	3	2	0	2	0	4	1	1	1	3	1	1	2	1	3	3	1	3	3	3	1	3	1	5	5	1	3	3	1	5	1	3
dog46	0	2	77	3	43	20	1	2	0	2	3	5	4	1	4	0	2	1	1	2	3	1	4	1	3	4	2	1	3	3	1	2	4	3	3	1	5	5	1	1	3	1	5	1	5	4	2	5	4
dog47	0	2	26	1	45	20	2	1	0	5	3	4	1	0	3	0	2	1	2	0	2	0	1	2	2	2	2	2	2	4	0	2	4	1	1	1	5	4	2	1	5	1	5	1	5	4	2	4	2
dog48	0	1	170	6	50	8	1	1	1	3	3	4	2	1	1	0	2	2	2	0	2	0	4	1	3	4	3	3	3	2	1	3	3	3	2	1	5	5	2	1	5	1	5	1	5	4	2	4	4
dog49	1	2	52	2	70	26	2	2	0	2	3	5	4	0	0	0	2	3	3	1	3	0	4	3	3	4	3	2	2	3	0	4	2	1	2	4	2	3	5	1	4	2	4	3	3	2	4	1	2
dog50	1	2	121	5	43	14	2	2	0	5	2	5	3	1	0	0	1	4	1	1	2	0	4	2	2	3	2	2	2	4	1	4	2	1	2	1	5	4	1	1	4	2	4	2	4	4	2	1	1
dog51	1	1	99	4	25	6	2	2	0	2	3	5	4	0	0	0	2	1	2	1	2	0	1	3	3	4	2	2	2	3	0	4	2	1	1	1	5	4	1	1	4	2	4	1	5	5	1	3	1
dog52	0	2	25	1	64	22	2	1	0	1	1	5	3	1	4	0	2	4	2	1	2	0	2	2	1	3	4	2	2	1	1	1	5	4	4	1	5	1	1	1	5	1	5	1	5	5	1	5	1
dog53	1	1	49	2	60	50	2	1	0	1	3	4	1	0	0	0	2	1	2	0	4	0	2	2	2	4	2	2	2	3	0	2	4	1	2	1	5	3	1	1	4	1	5	2	4	5	1	3	1
dog54	1	1	16	1	47	13	2	1	0	3	1	5	2	0	0	0	2	1	1	1	2	0	3	1	3	4	3	1	2	2	0	4	2	1	1	1	5	5	2	1	5	1	5	2	4	5	1	1	2
dog55	0	1	138	5	65	45	2	1	0	3	3	1	4	0	3	1	1	4	2	2	1	0	2	2	3	4	2	2	2	1	0	3	3	5	1	1	5	5	1	1	4	3	3	2	4	5	1	5	2
dog56	0	1	145	6	40	27	1	1	0	2	3	1	4	0	2	0	2	2	1	2	2	0	2	1	3	4	4	1	2	3	1	5	1	4	2	1	5	3	1	4	4	5	1	1	5	5	1	5	1
dog57	0	1	106	4	69	50	2	1	0	3	3	1	4	0	4	0	2	2	2	0	4	1	2	2	3	4	2	3	3	2	0	2	4	2	3	1	5	5	1	1	3	3	3	1	5	4	2	4	3
dog58	1	1	27	1	55	23	2	1	0	5	1	4	1	0	0	0	2	1	2	0	4	0	2	2	2	1	2	1	2	3	0	3	3	4	3	1	5	2	2	1	4	3	3	5	1	5	1	5	1
dog59	1	1	43	2	40	25	1	2	0	5	3	2	3	1	0	0	2	2	2	2	4	0	2	1	3	4	4	2	2	2	0	3	3	2	3	1	5	4	4	3	4	1	5	4	2	3	3	4	2
dog60	1	1	27	1	50	20	2	2	0	5	1	5	3	1	0	0	2	1	1	2	4	0	3	1	2	4	3	2	3	3	0	1	5	3	2	1	5	5	2	3	4	1	5	1	5	5	1	5	3
dog61	0	1	145	6	60	35	2	1	1	4	3	1	4	0	3	1	2	1	3	0	4	0	2	3	3	4	3	2	2	3	1	5	1	1	1	1	5	5	1	1	1	3	3	1	5	4	2	1	1
dog62	0	2	94	3	56	23	2	1	0	5	1	4	1	0	4	1	2	3	2	2	3	1	2	2	2	4	3	2	2	3	0	4	2	1	1	1	5	4	1	1	1	5	1	1	5	4	2	1	1
dog63	0	2	79	3	53	38	2	2	0	3	3	5	3	0	3	0	2	3	3	0	2	1	2	2	3	4	3	2	3	3	0	5	1	1	1	3	3	5	1	2	5	3	3	1	5	4	2	1	4
dog64	1	2	48	2	65	27	2	2	0	3	2	5	2	1	0	0	2	2	1	2	4	1	1	2	2	4	2	2	3	3	0	5	1	1	1	1	5	5	1	1	5	3	3	1	5	5	1	1	3
dog65	0	2	180	6	30	12	1	2	1	2	1	4	3	1	1	1	1	4	2	1	2	0	4	1	2	1	1	1	1	3	0	2	4	1	1	1	5	3	2	2	2	5	1	1	5	1	5	1	1
dog66	0	1	96	4	50	23	2	2	0	2	1	1	2	1	4	0	2	3	1	1	4	1	4	1	2	4	1	2	3	3	0	3	3	3	2	1	5	3	2	1	5	3	3	1	5	3	3	3	4
dog67	1	2	72	3	50	35	1	2	0	2	2	4	1	0	0	0	2	4	2	1	2	0	4	1	1	3	2	2	2	2	0	5	1	3	1	1	5	5	1	1	5	3	3	5	1	5	1	4	5
dog68	0	1	48	2	70	45	1	1	0	3	2	4	1	0	3	0	2	4	2	1	2	0	1	2	1	4	2	1	2	2	1	3	3	5	5	1	5	3	1	5	5	5	1	4	2	5	1	5	1
dog69	1	2	132	5	55	20	2	1	0	4	1	2	3	1	0	0	2	1	3	1	4	0	1	2	2	1	3	1	1	3	0	1	5	1	4	1	5	2	2	1	3	2	4	3	3	4	2	2	3
dog70	0	2	85	3	32	5	2	2	0	3	3	1	1	1	1	0	2	1	2	1	2	0	2	2	3	4	2	2	3	3	0	4	2	1	1	1	5	5	2	1	3	1	5	1	5	3	3	3	1
dog71	0	2	134	5	46	10	2	2	0	2	3	2	3	0	1	0	1	4	1	2	2	0	3	2	2	4	1	2	2	4	1	3	3	2	2	1	5	4	1	1	2	3	3	1	5	4	2	2	1
dog72	1	1	132	5	65	48	1	2	0	3	3	2	3	1	0	0	2	1	2	1	4	0	4	1	2	2	1	1	1	3	0	4	2	1	2	1	5	4	1	1	4	2	4	5	1	5	1	3	3
dog73	0	2	45	2	43	11	2	2	1	3	3	5	3	1	4	0	2	2	1	0	2	0	4	3	3	4	3	2	3	3	0	1	5	1	3	1	5	5	3	1	2	2	4	1	5	1	5	1	3
dog74	0	2	59	2	30	10	1	2	0	2	3	2	1	0	1	0	1	1	3	0	2	0	4	1	3	3	1	1	2	2	0	4	2	1	3	2	4	5	4	3	5	4	2	2	4	3	3	2	4
dog75	1	2	73	3	53	24	2	2	0	3	1	5	3	1	0	0	2	1	1	1	1	0	2	2	3	4	3	3	3	3	0	3	3	3	1	1	5	5	1	1	5	1	5	1	5	5	1	4	4
dog76	0	2	154	6	45	35	2	2	1	2	1	1	2	0	3	0	2	2	3	0	4	1	3	2	3	2	3	1	2	2	1	5	1	4	1	5	1	1	1	1	1	5	1	3	3	4	2	5	1
dog77	0	1	117	4	25	9	2	1	0	2	3	2	3	0	1	0	2	1	3	0	3	0	2	2	3	1	4	1	2	3	0	3	3	5	3	4	2	2	2	4	5	4	2	4	2	3	3	5	2
dog78	0	1	147	6	51	23	2	2	1	3	3	1	4	1	3	1	2	2	1	1	1	0	2	2	3	4	3	3	2	4	1	4	2	2	3	1	5	4	4	1	1	1	5	2	4	3	3	3	1
dog79	0	2	122	5	30	8	1	2	0	2	3	2	2	1	1	0	2	4	2	2	3	1	4	1	3	4	1	1	2	1	0	3	3	1	4	2	4	5	5	1	2	2	4	1	5	1	5	1	1
dog80	0	1	125	5	52	21	2	2	0	4	1	1	4	1	4	1	2	2	1	1	1	0	4	3	3	4	3	3	2	4	1	4	2	1	2	1	5	5	1	1	2	1	5	1	5	4	2	3	1
dog81	1	1	78	3	60	48	2	1	0	2	3	4	3	0	0	0	2	4	2	0	2	0	3	2	2	2	3	2	2	3	0	3	3	5	1	4	2	1	1	2	5	5	1	5	1	3	3	5	1
dog82	0	2	26	1	56	25	2	1	0	4	3	5	4	0	4	0	2	1	3	2	4	0	1	2	3	4	3	2	3	2	0	1	5	1	3	1	5	5	2	1	3	1	5	2	4	4	2	1	3
dog83	1	2	162	6	35	4	2	2	0	4	1	3	1	0	0	0	2	3	2	2	4	1	2	3	3	4	4	1	1	3	1	4	2	1	1	1	5	5	2	1	5	1	5	1	5	4	2	1	4
dog84	1	1	121	5	60	22	1	2	0	5	3	1	2	1	0	0	2	4	2	2	3	1	4	1	2	2	2	1	2	4	0	4	2	3	2	1	5	4	1	1	5	1	5	1	5	5	1	4	1
dog85	0	1	110	4	30	6	1	1	1	5	1	4	2	0	1	0	2	2	1	2	2	0	2	1	2	4	2	2	1	3	0	4	2	3	2	1	5	2	2	1	1	3	3	3	3	3	3	3	2
dog86	0	1	123	5	56	30	2	2	0	5	3	1	3	0	2	0	2	4	1	1	1	0	2	3	1	4	3	2	2	3	0	2	4	2	5	1	5	2	1	1	2	1	5	1	5	5	1	4	1
dog87	0	2	46	2	30	7	1	2	0	2	3	3	3	1	1	0	2	3	2	2	2	0	3	3	3	3	2	2	2	2	0	1	5	4	5	1	5	3	5	3	5	1	5	5	1	2	4	3	4
dog88	1	2	159	6	47	22	1	2	0	5	2	4	1	0	0	0	2	3	2	0	4	1	1	1	2	4	2	2	2	3	0	4	2	3	1	1	5	4	3	2	3	1	5	5	1	4	2	2	4
dog89	0	2	130	5	62	27	1	2	0	3	3	1	4	0	3	0	2	3	2	0	3	0	4	1	3	4	4	3	3	3	1	5	1	1	1	1	5	5	1	1	5	2	4	1	5	5	1	1	1
dog91	1	2	48	2	47	28	2	2	0	4	3	3	4	0	0	0	2	2	3	0	2	0	1	2	3	4	3	3	2	3	0	1	5	1	1	1	5	5	1	1	2	4	2	1	5	3	3	4	1
dog92	0	2	126	5	20	12	1	2	0	2	3	5	3	0	3	0	2	1	2	1	2	0	1	2	3	4	3	1	2	4	1	1	5	1	3	1	5	3	1	1	3	3	3	3	3	5	1	5	1
dog93	1	1	153	6	44	10	1	1	0	4	3	3	4	0	0	0	2	2	2	2	2	0	3	3	2	1	3	1	1	2	0	3	3	3	3	3	3	2	3	3	4	4	2	3	3	3	3	4	3
dog94	0	2	69	2	56	27	2	2	0	3	1	5	4	0	3	0	2	3	2	0	2	0	2	3	3	4	3	2	3	3	0	4	2	1	2	2	4	5	2	1	1	1	5	1	5	5	1	1	1
dog95	0	1	188	6	62	20	2	2	1	1	3	3	3	0	3	0	2	2	1	1	4	0	2	2	1	1	1	1	1	1	1	3	3	1	4	2	4	3	1	1	1	4	2	3	3	1	5	1	1
dog96	0	1	73	3	60	40	2	1	0	4	1	3	4	0	4	0	2	3	2	0	4	1	2	2	3	4	4	2	1	2	0	3	3	4	2	1	5	4	1	4	5	2	4	1	5	4	2	4	1
dog97	1	2	115	4	55	28	1	2	0	5	3	3	3	0	0	0	2	2	2	2	3	0	2	1	1	4	2	2	1	2	1	5	1	1	2	1	5	4	3	2	2	3	3	1	5	3	3	2	4
dog98	0	1	37	2	40	16	2	2	0	3	3	3	2	0	1	0	2	1	3	0	2	0	2	2	3	4	3	2	3	2	0	4	2	1	2	1	5	4	2	1	3	1	5	1	5	4	2	2	2
dog99	0	1	61	2	60	35	2	1	1	3	3	2	1	0	2	0	2	3	2	1	2	0	1	2	2	1	1	1	2	4	1	4	2	4	3	1	5	2	4	1	3	3	3	4	2	4	2	4	2
dog100	0	2	89	3	60	25	1	2	0	5	1	3	4	1	3	1	2	3	1	0	1	0	2	3	2	4	2	3	2	4	0	3	3	1	1	1	5	4	5	1	3	4	2	1	5	1	5	5	4
dog101	0	2	180	6	55	20	2	2	1	3	1	1	3	1	1	0	2	2	1	2	2	0	3	3	3	3	3	2	2	3	0	4	2	1	3	1	5	3	5	1	5	1	5	3	3	1	5	1	5
dog102	0	1	152	6	50	33	1	2	1	4	2	5	4	1	2	1	2	3	2	2	3	0	4	1	3	4	4	3	2	3	0	5	1	1	2	2	4	5	1	1	1	4	2	1	5	3	3	3	3
dog103	0	1	114	4	40	10	2	2	0	1	3	3	2	1	1	0	2	4	1	2	2	0	1	2	2	4	3	3	2	2	0	3	3	3	4	1	5	5	1	5	5	2	4	1	5	5	1	1	3
dog104	0	1	89	3	54	24	2	1	0	3	3	5	4	1	4	0	2	2	3	1	4	1	2	2	1	4	3	3	3	1	0	5	1	2	1	1	5	4	1	1	5	1	5	1	5	3	3	4	2
dog105	1	2	80	3	58	20	2	2	0	3	1	3	3	1	0	0	2	2	1	1	4	0	2	2	3	4	3	3	3	1	0	3	3	1	1	1	5	5	2	2	4	1	5	1	5	4	2	1	3
dog106	0	2	109	4	40	6	1	2	0	2	1	1	2	1	1	1	2	2	2	0	2	1	3	3	3	4	1	2	2	2	0	4	2	1	1	3	3	5	3	3	4	4	2	1	5	3	3	1	1
dog107	0	2	132	5	37	10	2	2	0	4	3	1	1	0	1	0	2	2	1	1	4	1	2	2	3	4	4	2	2	2	0	5	1	1	1	1	5	5	1	1	1	1	5	1	5	4	2	1	5
dog110	1	2	90	3	63	24	2	2	0	4	1	5	2	1	0	0	2	3	3	0	2	0	4	1	3	4	3	1	2	3	1	5	1	1	3	1	5	5	5	1	5	2	4	2	4	2	4	1	5
dog111	0	1	119	4	60	30	2	2	0	5	3	3	4	1	4	0	2	3	3	2	1	0	4	1	2	3	3	2	2	3	0	5	1	5	4	1	5	3	1	1	5	2	4	1	5	2	4	5	5
dog112	0	2	131	5	60	28	2	1	0	3	3	3	3	1	2	0	2	2	2	0	2	0	1	3	3	4	2	1	3	3	1	3	3	3	3	1	5	3	2	1	5	2	4	4	2	3	3	4	2
dog113	1	2	109	4	30	8	2	2	0	2	3	2	1	0	0	0	2	3	2	0	4	1	4	1	3	1	3	2	2	3	0	3	3	1	1	1	5	1	3	1	5	2	4	4	2	3	3	1	3
dog114	0	2	75	3	50	19	2	2	0	2	1	1	4	1	2	1	2	1	1	0	4	1	2	2	3	4	2	3	2	4	0	3	3	3	5	1	5	3	4	4	3	2	4	2	4	2	4	2	2
dog115	1	2	101	4	60	29	1	2	0	3	1	3	2	1	0	0	2	2	1	0	3	1	4	1	1	4	3	3	3	3	0	5	1	1	2	1	5	5	3	1	4	5	1	1	5	3	3	4	2
dog116	0	2	193	6	55	27	2	1	1	5	1	3	3	0	3	0	2	1	3	0	3	0	2	3	2	3	3	1	1	3	1	5	1	1	1	2	4	3	1	1	2	2	4	1	5	5	1	3	1
dog117	0	1	186	6	40	9	1	1	1	2	3	5	4	0	3	1	2	2	2	2	2	0	4	1	3	2	2	2	2	2	0	4	2	5	2	1	5	3	1	1	5	1	5	5	1	5	1	5	1
dog118	1	2	109	4	56	35	2	1	0	4	2	3	1	1	0	0	2	4	1	2	2	1	1	2	3	4	4	2	2	1	0	5	1	1	4	3	3	5	1	1	5	3	3	1	5	5	1	1	5
dog119	0	2	57	2	48	14	1	2	1	4	1	5	3	1	1	0	2	2	1	2	2	0	3	1	3	4	4	2	2	1	0	5	1	1	1	1	5	4	1	1	1	3	3	1	5	4	2	2	3
dog120	1	2	21	1	49	15	2	2	0	4	2	5	3	1	0	0	2	2	1	1	2	0	2	2	3	4	4	2	2	1	0	2	4	1	4	1	5	5	1	3	3	1	5	1	5	2	4	5	1
dog121	1	2	93	3	40	35	2	2	0	4	3	3	4	0	0	0	2	3	2	1	4	0	4	1	3	4	2	2	2	2	0	5	1	2	1	3	3	4	1	1	4	1	5	3	3	3	3	2	3
dog122	1	2	73	3	55	22	1	1	0	3	3	5	2	1	0	0	2	4	2	0	4	0	3	1	3	4	2	2	2	2	0	2	4	1	4	1	5	4	4	2	3	4	2	1	5	2	4	1	2
dog123	0	2	45	2	25	15	1	2	0	2	3	4	1	1	4	0	1	3	2	2	3	0	2	1	3	4	3	1	3	3	0	1	5	4	4	1	5	3	3	4	3	1	5	1	5	3	3	1	3
dog124	0	1	120	5	18	3	2	2	0	3	3	1	1	0	2	0	2	3	3	0	4	1	1	2	3	4	2	1	1	4	0	5	1	3	1	2	4	5	4	1	2	5	1	2	4	4	2	4	1
dog125	0	1	122	5	28	8	2	2	0	3	3	5	4	1	4	0	2	4	2	2	2	0	3	3	3	4	3	2	3	2	0	4	2	1	1	1	5	4	5	1	2	2	4	2	4	5	1	3	2
dog126	0	2	108	4	50	23	2	2	0	4	3	3	1	1	3	0	2	4	3	1	1	0	2	2	2	4	2	1	2	4	0	4	2	1	1	1	5	5	4	1	5	3	3	2	4	5	1	5	4
dog127	0	2	106	4	30	14	1	2	0	4	3	2	1	1	3	0	2	1	2	1	4	0	3	3	1	1	2	1	3	3	0	1	5	2	2	1	5	4	4	2	5	2	4	1	5	3	3	2	3
dog128	1	2	145	6	25	7	1	1	0	1	2	5	1	1	0	0	2	4	2	0	2	0	1	2	3	1	4	1	2	2	1	4	2	5	1	1	5	3	5	1	2	4	2	1	5	4	2	1	5
dog129	0	2	189	6	50	25	2	2	1	1	1	4	1	1	2	1	2	1	3	2	3	1	2	2	2	2	1	1	1	3	0	4	2	3	3	5	1	3	1	1	1	1	5	3	3	3	3	4	1
dog130	0	2	99	4	63	45	2	2	0	2	3	4	2	0	1	1	2	1	1	2	3	0	3	2	3	1	1	1	2	2	0	4	2	5	4	2	4	1	1	1	4	3	3	1	5	5	1	5	1
dog131	1	1	61	2	60	26	2	1	0	5	3	4	1	0	0	0	2	1	2	1	4	0	2	2	2	4	3	1	2	3	0	3	3	1	1	1	5	3	1	1	4	3	3	1	5	3	3	1	1
dog132	0	2	144	6	50	40	1	1	1	5	3	3	3	0	2	0	2	1	2	0	4	0	1	1	2	1	4	3	1	1	1	5	1	3	1	2	4	5	2	2	2	2	4	2	4	4	2	4	2
dog133	1	2	86	3	35	7	2	2	0	2	1	5	1	1	0	0	2	2	3	0	2	0	2	2	3	4	1	2	3	3	0	3	3	4	3	1	5	4	2	2	4	1	5	2	4	5	1	5	3
dog134	1	1	35	1	45	12	2	2	0	3	3	5	2	0	0	0	2	1	2	2	3	0	2	2	3	4	3	3	3	2	0	4	2	2	3	1	5	5	5	1	5	1	5	1	5	3	3	1	5
dog135	0	2	134	5	50	33	2	2	1	2	2	1	4	0	2	1	2	1	2	0	2	0	2	2	1	4	1	2	2	4	0	3	3	1	1	1	5	5	1	1	1	4	2	4	2	5	1	3	2
dog136	1	2	82	3	45	25	2	2	0	2	2	2	2	1	0	0	2	2	2	0	2	0	3	1	3	4	3	2	2	3	0	5	1	1	1	1	5	5	1	1	1	1	5	1	5	3	3	1	1
dog137	0	1	42	2	60	30	1	2	0	3	3	5	1	1	1	0	2	2	2	2	2	0	3	1	3	4	3	2	3	2	1	3	3	1	3	1	5	5	5	2	1	3	3	1	5	3	3	1	1
dog138	0	1	75	3	51	23	2	1	0	4	3	5	2	0	1	0	2	1	2	0	4	0	2	2	3	4	2	2	3	3	0	3	3	3	2	2	4	5	1	1	1	4	2	1	5	3	3	3	2
dog139	0	1	102	4	35	15	2	2	1	2	1	1	4	0	4	0	2	2	2	0	1	0	4	1	3	3	3	1	3	4	1	4	2	2	1	1	5	4	3	1	2	3	3	1	5	3	3	3	5
dog140	1	2	97	4	50	25	1	2	0	3	3	3	1	1	0	0	2	2	2	1	1	0	4	1	3	3	3	1	2	4	0	4	2	3	4	1	5	3	3	3	5	3	3	3	3	2	4	2	4
dog141	0	2	38	2	54	20	2	1	0	4	3	3	1	0	4	0	2	3	2	0	1	0	2	2	3	4	4	3	2	3	0	4	2	1	1	1	5	5	1	1	1	1	5	1	5	5	1	1	1
dog142	1	2	41	2	20	9	2	2	0	4	3	1	1	0	0	0	2	2	2	1	3	1	1	3	3	4	3	2	3	2	0	1	5	1	4	1	5	4	3	1	5	1	5	1	5	3	3	1	2
dog143	1	1	26	1	77	46	2	1	0	5	1	1	4	1	0	0	1	2	2	0	4	1	2	2	2	4	2	2	3	3	0	2	4	2	1	1	5	4	1	1	4	3	3	2	4	5	1	5	1
dog145	0	2	125	5	56	40	2	2	1	2	2	5	3	0	2	0	2	4	1	2	4	1	4	3	2	4	3	2	1	3	1	2	4	1	1	3	3	4	4	1	1	3	3	1	5	4	2	1	1
dog146	1	1	52	2	60	23	2	1	0	4	1	2	1	0	0	0	2	2	3	1	2	0	2	2	3	4	3	2	3	2	0	1	5	3	2	1	5	4	1	1	3	3	3	1	5	5	1	4	3
dog147	1	1	12	1	65	42	2	1	0	3	3	5	4	0	0	0	2	3	3	1	1	0	3	2	3	4	3	1	2	3	0	3	3	1	1	3	3	2	3	1	4	3	3	1	5	3	3	1	1
dog148	1	2	125	5	43	20	1	2	0	2	3	5	1	0	0	0	2	2	1	2	3	1	3	1	1	4	1	3	2	3	1	4	2	2	2	2	4	4	4	1	4	1	5	2	4	3	3	3	3
dog149	0	2	192	6	52	18	1	2	1	4	3	3	3	0	1	1	2	1	1	1	4	0	1	2	2	3	1	1	1	2	0	5	1	2	2	1	5	4	1	1	1	2	4	1	5	3	3	2	2
dog150	1	2	39	2	82	60	2	1	0	2	3	5	1	0	0	0	2	2	1	2	3	1	3	2	1	4	2	2	2	3	0	5	1	3	1	4	2	4	2	3	1	4	2	2	4	4	2	5	2
dog151	0	2	102	4	35	14	2	2	0	2	3	3	4	1	1	0	2	2	2	0	2	0	4	1	3	4	2	1	3	4	0	4	2	2	3	3	3	4	4	1	3	3	3	1	5	1	5	1	3
dog152	0	2	81	3	25	3	2	1	0	3	3	3	4	1	1	1	2	3	3	0	1	0	1	3	3	4	4	3	2	2	0	4	2	1	3	1	5	5	2	1	4	1	5	1	5	2	4	2	3
dog153	1	1	97	4	74	35	1	1	0	5	3	5	2	0	0	0	1	3	1	2	4	1	1	2	3	2	1	2	1	1	0	2	4	2	2	1	5	4	1	3	5	2	4	4	2	5	1	4	1
dog154	1	2	31	1	50	38	2	1	0	5	3	4	2	0	0	0	2	4	2	0	4	1	3	2	3	4	2	2	2	3	0	3	3	4	1	1	5	2	1	4	4	1	5	1	5	5	1	4	1
dog155	0	1	133	5	40	35	1	1	0	4	2	4	2	0	1	0	2	3	2	2	4	1	1	1	2	1	1	1	1	3	0	5	1	4	1	1	5	2	1	1	4	4	2	4	2	5	1	5	5
dog156	1	1	43	2	50	17	1	2	0	2	3	5	1	0	0	0	2	2	3	0	4	1	3	1	2	4	2	2	2	4	0	3	3	1	1	1	5	5	1	1	5	1	5	5	1	5	1	5	1
dog159	0	2	144	6	20	7	1	2	0	3	3	3	4	1	1	0	2	4	2	1	2	0	1	1	3	4	4	1	2	3	0	5	1	1	1	1	5	5	1	1	4	2	4	1	5	5	1	1	3
dog160	0	1	132	5	70	41	2	2	1	2	1	1	4	0	3	1	2	3	1	2	3	1	2	2	1	1	2	3	2	2	1	3	3	3	1	3	3	1	1	4	1	3	3	1	5	5	1	5	3
dog161	1	2	120	5	50	19	1	2	0	3	3	1	1	1	0	0	2	3	1	2	3	1	4	1	2	2	1	1	2	2	0	5	1	1	4	1	5	4	5	1	5	5	1	1	5	1	5	1	3
dog162	1	2	40	2	70	30	2	2	0	5	3	2	3	0	0	0	2	1	2	2	3	0	2	3	2	2	1	1	1	4	0	1	5	2	2	1	5	2	1	3	5	2	4	1	5	5	1	4	1
dog163	1	2	51	2	58	46	2	1	0	3	3	5	4	0	0	0	2	3	1	2	2	0	2	2	3	3	3	2	2	3	0	3	3	5	2	1	5	3	1	2	4	2	4	2	4	5	1	5	3
dog164	1	1	25	1	70	25	2	1	0	3	1	4	2	0	0	0	2	3	3	2	3	1	2	2	3	4	4	3	2	3	0	3	3	1	3	1	5	4	3	1	4	4	2	3	3	3	3	4	3
dog165	0	1	61	2	39	14	2	1	0	1	3	3	4	0	3	0	2	4	2	0	2	0	3	2	3	4	4	1	2	1	0	3	3	4	1	1	5	1	1	1	4	1	5	5	1	4	2	4	1
dog168	1	2	17	1	45	52	2	1	0	5	3	5	2	0	0	0	2	2	2	1	2	0	2	3	2	2	3	1	2	3	0	4	2	1	1	1	5	4	1	1	2	2	4	2	4	3	3	2	1
dog169	0	1	170	6	45	12	1	1	1	5	3	4	1	1	2	1	1	2	3	0	3	1	4	3	2	2	1	1	1	4	0	5	1	1	1	3	3	4	2	1	2	1	5	3	3	1	5	1	1
dog170	0	2	158	6	20	3	2	2	0	1	3	2	3	1	4	1	2	1	2	0	4	0	2	2	3	1	2	1	2	2	1	2	4	5	3	2	4	1	4	4	3	3	3	2	4	3	3	1	2
dog171	1	1	98	4	50	20	1	1	0	3	3	3	3	1	0	0	2	3	2	1	3	0	2	1	3	4	3	3	3	2	0	4	2	3	2	1	5	5	1	1	3	1	5	1	5	5	1	5	1
dog173	0	2	71	2	53	31	1	2	0	3	2	5	2	0	2	0	2	3	3	0	4	1	2	3	3	4	2	2	2	1	0	3	3	1	2	1	5	3	1	1	5	2	4	3	3	4	2	5	1
dog174	1	1	131	5	30	9	2	1	0	3	2	4	1	0	0	0	2	2	2	0	2	0	2	3	3	1	2	1	1	3	0	2	4	2	4	2	4	3	4	1	5	4	2	2	4	3	3	4	1
dog175	1	2	14	1	60	22	1	1	0	2	1	4	2	0	0	0	2	1	3	0	2	0	1	1	3	4	2	1	3	3	0	3	3	1	1	2	4	4	3	1	3	1	5	2	4	2	4	3	1
dog176	1	1	65	2	85	45	2	1	0	5	3	5	2	0	0	0	2	1	2	2	4	0	2	2	2	2	2	1	2	4	0	3	3	4	5	2	4	5	5	1	5	5	1	3	3	1	5	5	5
dog177	1	1	29	1	28	8	1	1	0	1	1	4	2	1	0	0	2	2	3	0	2	0	4	1	3	3	3	2	3	3	0	3	3	1	2	1	5	3	1	1	3	1	5	2	4	3	3	2	1
dog178	0	2	169	6	52	22	2	2	1	1	1	3	2	0	2	0	2	3	1	2	4	1	3	2	3	2	1	1	1	3	1	5	1	1	1	3	3	1	1	1	1	3	3	1	5	4	2	1	3
dog179	0	2	139	5	35	5	2	2	0	3	3	2	2	0	1	0	2	4	3	1	1	0	2	2	3	4	4	3	3	2	0	2	4	3	3	1	5	5	3	3	2	3	3	5	1	3	3	2	2
dog180	1	2	27	1	65	45	2	1	0	4	3	4	3	0	0	0	1	4	1	2	2	0	2	2	2	2	2	2	1	3	0	1	5	2	2	1	5	3	2	4	2	4	2	1	5	3	3	4	1
dog181	1	1	54	2	45	10	1	2	0	3	3	5	2	0	0	0	2	2	3	0	2	0	1	1	3	4	3	2	2	3	0	3	3	2	1	1	5	4	3	2	4	4	2	1	5	3	3	2	3
dog183	0	1	192	6	35	22	1	2	0	3	3	5	3	1	3	0	2	2	2	2	2	0	1	1	2	4	2	2	3	2	0	3	3	1	1	1	5	4	1	1	3	1	5	1	5	5	1	3	2
dog184	1	2	17	1	20	4	2	2	0	2	3	3	1	0	0	0	2	1	3	0	3	0	2	2	3	2	4	2	3	3	1	2	4	3	5	1	5	2	5	4	5	2	4	3	3	1	5	1	4
dog185	1	1	18	1	60	50	2	1	0	1	3	4	2	1	0	0	2	1	3	2	4	0	2	2	2	3	3	1	1	3	1	2	4	2	1	1	5	2	2	1	1	3	3	3	3	2	4	2	2
dog186	0	1	77	3	56	20	2	1	0	3	3	1	4	1	3	0	2	2	2	1	2	0	2	2	3	4	3	2	3	3	1	4	2	2	2	1	5	5	1	2	1	2	4	1	5	4	2	2	3
dog187	0	1	96	4	18	10	2	1	0	1	3	2	4	1	1	0	2	2	3	0	4	1	2	3	2	3	1	1	1	2	0	1	5	3	1	3	3	1	1	1	4	1	5	3	3	5	1	4	1
dog188	0	1	130	5	60	25	2	1	0	3	3	1	4	1	2	0	1	4	1	2	2	0	2	2	3	4	3	3	1	1	1	2	4	2	1	1	5	5	2	1	1	1	5	1	5	3	3	3	3
dog189	1	2	60	2	35	7	1	2	0	3	3	3	1	0	0	0	2	2	2	1	2	0	3	3	3	4	3	2	3	3	0	1	5	3	3	1	5	4	5	3	5	1	5	1	5	2	4	2	3
dog190	0	1	182	6	20	14	2	1	1	3	3	3	3	0	3	0	2	3	2	2	2	0	2	3	1	4	4	2	1	2	0	3	3	3	2	1	5	4	1	3	5	3	3	2	4	5	1	4	1
dog192	0	2	85	3	45	16	1	2	0	1	3	1	4	0	1	0	2	2	2	0	2	0	2	3	3	4	3	2	2	4	0	3	3	1	2	1	5	2	3	1	5	4	2	3	3	4	2	1	2
dog193	0	2	88	3	55	28	2	2	0	3	3	3	4	1	3	1	2	4	3	1	1	1	4	3	3	4	3	2	2	1	0	5	1	1	1	1	5	5	1	1	3	2	4	1	5	5	1	1	1
dog194	1	2	62	2	45	20	1	2	0	4	3	4	2	1	0	0	2	1	1	2	4	0	4	1	2	4	3	2	2	3	0	5	1	1	1	1	5	4	2	1	3	1	5	1	5	4	2	4	2
dog195	0	2	151	6	25	16	2	2	1	3	3	1	4	1	3	1	2	3	2	0	1	0	2	2	3	4	3	2	3	3	1	5	1	1	2	1	5	5	4	1	1	3	3	1	5	2	4	1	1
dog196	0	2	127	5	43	11	2	1	0	5	3	1	2	0	1	0	2	1	2	2	2	0	1	2	2	4	3	3	3	4	1	4	2	2	2	1	5	5	2	3	1	3	3	1	5	4	2	3	2
dog198	1	2	42	2	60	28	1	2	0	3	3	4	2	0	0	1	2	2	2	1	2	0	3	1	3	4	3	2	3	3	0	1	5	2	2	1	5	4	2	2	4	1	5	1	5	4	2	2	1
dog199	0	1	129	5	33	16	1	2	1	3	2	2	4	0	3	0	2	3	2	1	1	0	2	3	3	4	3	2	2	4	1	2	4	2	1	1	5	3	1	2	1	1	5	1	5	4	2	4	2
dog200	1	2	151	6	20	10	1	2	0	3	3	5	2	0	0	0	1	4	2	1	3	0	1	1	2	3	1	2	2	3	0	4	2	2	2	1	5	4	2	1	3	3	3	5	1	4	2	3	2
dog201	0	1	145	6	50	28	1	2	0	2	3	3	4	1	2	0	2	2	1	2	2	0	4	1	2	3	1	1	1	1	1	5	1	1	3	3	3	4	3	1	4	1	5	1	5	3	3	3	3
dog202	0	2	69	2	55	31	2	2	0	3	3	3	4	1	3	0	2	1	1	2	3	0	2	2	2	4	2	3	2	3	0	1	5	1	2	1	5	5	2		4	1	5	1	5	3	3	5	2
dog203	0	2	134	5	45	23	1	2	0	3	3	1	1	0	1	0	2	1	3	1	4	0	2	3	3	2	3	1	2	3	0	4	2	2	4	2	4	4	3	1	2	4	2	5	1	2	4	3	4
dog205	1	1	107	4	50	12	1	2	0	2	1	4	2	1	0	0	1	4	3	1	4	1	3	1	3	4	3	2	2	3	0	4	2	3	3	1	5	5	2	2	4	3	3	2	4	2	4	3	3
dog206	1	1	21	1	51	22	2	2	0	2	3	5	4	0	0	0	2	1	2	1	2	0	2	2	3	3	4	2	2	3	1	1	5	1	1	1	5	1	1	1	4	1	5	1	5	5	1	4	1
dog207	1	1	35	1	53	23	1	2	0	2	3	5	4	1	0	0	2	1	2	1	2	0	4	1	3	4	4	2	3	3	0	4	2	5	5	2	4	3	3	2	5	5	1	1	5	1	5	4	1
dog208	0	1	196	6	35	7	2	1	1	3	3	4	2	0	1	1	2	1	3	1	2	0	1	3	3	3	3	1	2	2	1	5	1	1	1	4	2	1	3	1	1	4	2	1	5	1	5	1	1
dog209	1	2	123	5	48	15	2	2	0	4	3	3	4	0	0	0	2	2	1	2	2	0	2	2	3	4	3	3	3	1	0	2	4	1	1	1	5	5	1	1	3	1	5	1	5	5	1	5	1
dog210	0	1	99	4	58	24	1	2	0	3	3	4	3	0	3	0	1	3	2	2	2	0	2	1	3	4	4	3	2	4	0	3	3	1	2	1	5	5	2	1	5	3	3	1	5	4	2	2	2
dog211	0	2	85	3	52	18	2	2	0	4	3	4	3	1	3	0	1	3	2	2	2	0	4	1	3	4	4	3	2	4	0	5	1	1	2	1	5	5	4	2	5	1	5	1	5	3	3	1	2
dog212	0	1	163	6	20	10	1	1	0	3	3	3	4	1	1	1	2	3	2	1	2	0	3	1	3	4	3	2	1	3	1	3	3	3	2	1	5	2	4	1	1	1	5	2	4	4	2	2	4
dog213	0	2	158	6	56	33	1	2	0	2	3	3	1	1	3	0	1	4	1	2	2	0	4	1	1	1	1	1	1	4	1	3	3	1	1	1	5	1	1	1	1	1	5	1	5			1	2
dog214	0	1	90	3	60	26	2	1	0	2	3	5	2	0	1	0	2	1	1	2	4	1	1	2	2	4	3	2	3	4	0	4	2	1	2	1	5	4	1	1	5	4	2	1	5	4	2	4	2
dog215	0	1	86	3	38	12	2	2	0	3	3	4	3	0	3	1	2	3	2	2	2	0	3	1	3	4	4	3	2	4	0	5	1	3	2	1	5	3	1	1	5	2	4	2	4	4	2	3	3
dog216	1	1	24	1	43	19	2	2	0	3	1	4	2	0	0	0	2	1	2	1	2	0	2	2	1	4	2	2	3	3	0	3	3	2	1	1	5	5	1	1	3	1	5	1	5	5	1	4	1
dog218	1	1	80	3	62	28	1	2	0	3	3	4	2	1	0	0	2	1	1	1	2	0	2	3	3	4	3	2	3	4	0	3	3	3	3	1	5	4	1	2	4	3	3	1	5	4	2	3	4
dog219	1	2	20	1	55	23	1	2	0	5	3	5	1	0	0	0	2	2	3	1	3	1	2	3	2	4	3	1	2	1	0	3	3	1	1	1	5	5	1	1	2	3	3	1	5	4	2	2	1
dog220	0	1	182	6	35	13	1	1	0	4	3	1	4	1	3	1	2	4	2	1	2	0	2	3	1	1	1	1	1	2	0	3	3	3	4	3	3	1	3	3	2	2	4	4	2	5	1	4	3
dog221	1	2	72	3	25	7	2	1	0	2	3	5	2	0	0	0	2	1	3	1	2	0	1	2	3	4	3	2	2	4	0	1	5	1	2	1	5	4	3	1	5	1	5	1	5	3	3	1	4
dog222	1	2	33	1	60	25	1	2	0	2	1	2	1	0	0	0	2	2	3	0	2	0	2	1	3	4	3	2	3	2	0	1	5	2	3	1	5	4	3	2	5	2	4	2	4	2	4	2	2
dog223	0	1	198	6	50	33	1	2	1	5	3	5	4	0	2	1	2	3	1	2	2	0	2	1	2	1	1	1	1	4	0	5	1	4	2	1	5	4	1	1	2	2	4	1	5	5	1	4	2
dog224	0	2	28	1	51	28	2	2	0	2	3	5	3	0	3	0	2	1	2	2	4	0	2	2	3	4	3	2	3	3	0	2	4	1	1	1	5	3	1	1	5	3	3	4	2	5	1	1	1
dog225	1	1	109	4	53	20	2	1	0	3	3	1	2	0	0	0	2	2	1	1	2	0	2	2	3	4	2	2	3	3	1	1	5	1	2	1	5	4	1	1	4	2	4	2	4	4	2	4	1
dog226	1	2	72	3	35	9	1	2	0	2	3	5	2	1	0	0	1	2	3	1	2	0	4	1	3	4	3	1	3	4	1	1	5	1	1	1	5	5	3	1	5	4	2	3	3	3	3	1	1
dog227	0	2	30	1	29	4	2	1	0	3	3	1	4	1	3	0	2	1	1	2	1	0	2	2	3	4	3	3	3	2	0	4	2	3	2	1	5	4	2	1	3	2	4	1	5	4	2	2	3
dog228	0	1	173	6	30	10	2	1	1	3	1	5	3	0	2	0	2	1	2	1	3	1	2	2	3	1	1	1	1	3	0	3	3	1	1	3	3	1	1	2	2	5	1	2	4	2	4	4	2
dog229	0	2	139	5	25	8	1	1	0	5	3	4	1	0	4	0	1	2	2	0	1	0	1	3	2	1	1	1	1	3	0	4	2	1	2	2	4	5	3	2	4	2	4	5	1	4	2	3	3
dog231	0	1	84	3	44	23	2	1	0	2	3	2	4	0	4	1	2	1	3	0	4	0	2	2	3	4	3	2	3	3	0	3	3	1	1	1	5	3	1	1	1	5	1	1	5	4	2	2	2
dog232	1	1	36	2	50	20	2	2	0	5	3	5	2	0	0	0	2	1	2	1	3	1	2	2	3	4	3	2	3	3	0	3	3	4	3	1	5	5	4	1	2	1	5	1	5	3	3	4	5
dog233	0	1	34	1	20	6	2	1	0	3	3	4	2	0	3	1	2	1	2	1	2	0	1	2	3	4	3	2	3	2	0	3	3	1	1	1	5	3	1	1	3	3	3	1	5	5	1	4	1
dog234	0	1	67	2	35	8	2	1	0	5	1	5	2	0	3	0	2	2	2	0	3	1	2	2	2	4	1	2	2	4	0	4	2	1	1	3	3	5	1	1	5	3	3	1	5	5	1	2	2
dog235	0	2	84	3	37	10	2	2	0	3	3	1	2	0	1	0	2	2	3	1	2	0	1	2	3	4	2	2	3	2	0	1	5	1	2	1	5	5	1	1	4	1	5	4	2	4	2	1	3
dog237	0	1	50	2	23	6	2	1	0	2	3	5	2	1	1	0	2	1	3	0	3	0	3	2	3	3	4	2	2	2	0	2	4	1	4	2	4	1	5	1	4	3	3	2	4	3	3	4	3
dog238	1	1	30	1	25	5	2	2	0	4	3	4	2	1	0	0	2	3	2	2	4	1	2	2	2	3	3	1	2	2	0	4	2	2	1	1	5	1	1	4	4	3	3	5	1	5	1	2	4
dog239	1	1	21	1	60	20	2	1	0	2	1	1	3	0	0	0	2	1	2	0	2	0	2	2	1	3	3	2	3	3	0	5	1	1	1	1	5	5	1	1	2	1	5	1	5	3	3	1	1
dog240	0	2	29	1	58	32	2	1	0	5	3	5	4	0	2	1	1	4	2	1	2	0	3	3	2	4	3	2	3	3	0	3	3	1	1	1	5	5	3	1	4	2	4	1	5	2	4	1	3
dog241	0	1	144	6	30	14	2	1	1	3	2	3	3	1	0	0	2	1	2	1	4	0	2	2	3	4	3	1	1	2	0	3	3	1	2	3	3	5	3	2	2	4	2	1	5	5	1	2	3
dog242	1	1	116	4	53	23	2	1	0	5	3	1	2	0	0	0	2	1	1	2	3	0	2	2	2	3	1	2	1	3	0	3	3	4	1	2	4	4	1	1	1	3	3	1	5	5	1	4	2
dog243	1	1	16	1	65	35	2	1	0	3	1	5	4	0	0	0	1	3	2	1	1	0	2	2	3	4	3	3	3	3	0	1	5	3	2	1	5	4	1	3	5	1	5	1	5	5	1	5	1
dog244	0	1	36	2	58	24	2	1	0	5	3	2	1	0	3	1	2	2	1	2	2	0	3	2	3	4	3	2	2	3	0	3	3	1	1	1	5	4	4	1	4	1	5	1	5	3	3	1	1
dog245	0	1	181	6	50	20	2	1	1	3	3	4	2	1	1	0	2	2	2	0	1	0	3	3	1	4	2	3	2	3	0	3	3	3	1	1	5	3	1	2	1	3	3	2	4	5	1	4	4
dog246	0	2	80	3	60	35	1	2	0	5	3	4	1	1	4	1	2	2	1	1	1	0	4	1	2	4	3	2	1	4	0	1	5	5	4	1	5	3	1	4	5	3	3	5	1	4	2	5	1
dog247	0	2	68	2	55	30	2	2	0	4	3	1	2	0	3	0	2	4	3	0	2	0	1	3	3	4	4	3	3	1	0	4	2	1	1	1	5	5	3	1	5	1	5	1	5	3	3	1	3
dog248	0	2	124	5	30	10	2	2	0	1	3	3	2	1	1	0	2	1	3	0	2	0	4	1	3	4	1	1	1	2	0	1	5	3	3	1	5	4	3	4	4	1	5	1	5	3	3	3	3
dog249	0	2	121	5	30	9	2	2	1	1	3	1	4	0	0	0	2	1	1	2	4	0	3	1	3	3	2	1	3	3	0	1	5	2	1	1	5	2	1	1	1	2	4	3	3	4	2	4	4
dog250	0	1	55	2	36	7	1	2	0	3	3	5	3	1	3	0	2	3	2	1	3	0	3	1	3	4	3	2	3	3	0	5	1	1	1	2	4	4	1	1	3	1	5	1	5	5	1	4	2
dog251	0	2	86	3	50	20	1	2	0	5	3	3	1	0	1	1	2	2	2	1	3	0	2	2	2	2	2	1	1	1	0	2	4	5	2	5	1	2	5	2	5	1	5	3	3	4	2	5	1
dog252	0	1	100	4	40	17	2	1	1	4	2	4	2	1	4	0	2	2	2	0	4	1	2	3	2	2	2	1	1	3	0	1	5	2	3	1	5	2	1	1	5	3	3	5	1	5	1	4	1
dog253	0	1	72	3	60	20	1	2	0	5	3	4	1	0	3	0	2	2	2	1	3	0	2	2	2	4	1	1	1	4	0	2	4	1	1	2	4	3	1	2	4	2	4	5	1	4	2	3	1
dog254	0	2	77	3	40	15	2	2	0	5	1	4	2	0	4	0	1	2	1	2	2	0	2	2	2	2	2	1	1	3	0	1	5	1	2	1	5	2	1	1	2	2	4	4	2	3	3	5	1
dog255	0	1	123	5	35	29	2	1	1	2	2	4	2	1	3	0	2	1	2	0	2	0	1	2	3	1	1	1	1	1	0	5	1	1	1	5	1	1	1	1	1	5	1	1	5	5	1	1	1
dog256	0	2	50	2	55	34	2	2	0	4	3	3	2	1	3	0	2	2	2	1	2	0	4	1	3	4	2	2	3	3	0	3	3	3	1	1	5	5	1	1	3	1	5	1	5	4	2	3	1
dog257	0	2	92	3	30	5	1	2	0	1	1	1	4	1	2	1	2	3	1	2	2	0	3	2	3	3	3	1	2	3	0	2	4	1	1	1	5	3	3	1	5	4	2	1	5	3	3	1	3
dog259	0	1	78	3	27	5	2	1	0	3	3	3	1	1	2	0	2	3	3	1	4	1	3	2	3	1	3	2	1	2	0	1	5	4	1	1	5	1	1	1	4	3	3	1	5	4	2	5	1
dog260	1	1	38	2	55	40	2	1	0	3	2	4	1	0	0	0	2	3	3	0	3	1	2	2	3	3	2	1	2	2	0	1	5	2	1	1	5	3	1	1	4	1	5	1	5	4	2	4	2
dog261	1	1	46	2	40	18	1	2	0	4	2	5	1	1	0	0	2	4	1	2	3	1	2	2	3	4	4	2	2	3	0	1	5	2	1	1	5	5	1	2	5	3	3	1	5	5	1	3	5
dog262	0	2	76	3	20	4	1	2	0	2	1	5	2	1	1	0	2	1	2	0	2	0	4	3	3	4	3	2	3	4	0	1	5	1	4	1	5	5	5	1	5	3	3	1	5	4	2	1	5
dog263	0	1	138	5	60	65	2	1	0	5	3	1	4	0	3	1	2	4	3	2	2	0	1	2	2	1	4	2	1	2	0	2	4	3	2	1	5	2	1	4	3	2	4	2	4	3	3	2	3
dog264	0	2	39	2	53	28	2	2	0	5	3	5	2	0	4	0	2	4	2	0	2	0	2	2	3	4	3	3	3	3	0	2	4	3	1	1	5	3	1	2	4	1	5	1	5	4	2	4	1
dog265	0	1	93	3	60	35	1	2	0	3	2	5	4	0	4	1	2	2	3	1	2	0	1	3	3	4	3	3	2	2	0	4	2	1	1	1	5	5	3	1	5	3	3	1	5	4	2	1	3
dog266	0	1	79	3	65	27	1	2	0	3	1	1	3	1	4	0	2	2	1	1	2	0	2	3	3	4	4	3	3	2	0	1	5	1	5	1	5	4	1	1	1	3	3	1	5	3	3	5	2
dog268	0	2	54	2	30	6	1	2	0	3	1	3	3	1	4	0	2	2	1	1	2	0	4	1	3	3	4	2	3	2	0	2	4	1	3	1	5	3	3	1	5	2	4	4	2	4	2	2	3
dog269	0	2	65	2	35	7	1	2	0	1	1	1	2	1	4	0	2	2	3	0	1	0	3	1	3	4	2	2	3	2	0	1	5	2	5	1	5	4	1	2	2	2	4	4	2	2	4	4	3
dog270	0	1	24	1	45	32	2	1	0	2	3	3	3	1	1	0	2	2	1	2	3	1	2	2	2	4	3	2	3	2	0	2	4	4	1	1	5	1	1	3	2	4	2	1	5	3	3	5	1
dog271	0	2	100	4	55	27	1	2	1	3	3	2	4	1	4	0	2	1	1	1	2	0	3	1	3	4	3	2	2	3	0	3	3	1	1	2	4	5	3	1	1	3	3	1	5	4	2	3	1
dog272	0	2	90	3	73	28	2	1	0	2	1	3	4	0	2	0	2	1	1	2	2	0	2	2	1	2	4	1	2	3	0	5	1	4	1	2	4	3	1	3	5	3	3	4	2	4	2		2
dog273	0	2	87	3	45	30	2	2	0	2	3	3	3	0	1	1	2	2	2	2	3	1	2	2	1	4	3	2	3	2	0	3	3	3	1	1	5	2	1	1	5	4	2	1	5	5	1	5	1
dog274	0	1	137	5	40	19	1	1	0	1	3	1	1	0	1	0	2	4	2	2	1	0	2	1	3	4	1	1	1	3	0	3	3	3	3	1	5	2	1	1	2	2	4	2	4	3	3	3	1
dog275	1	2	81	3	45	30	2	2	0	2	3	3	3	0	0	0	2	2	2	2	3	1	2	2	1	4	3	2	3	2	0	4	2	1	2	1	5	4	2	1	5	2	4	1	5	4	2	4	1
dog276	1	2	24	1	25	5	2	2	0	2	1	3	4	0	0	0	2	2	2	0	2	0	3	2	3	3	3	2	2	3	0	3	3	4	4	1	5	2	3	1	5	4	2	1	5	2	4	1	1
dog277	0	1	64	2	70	45	1	1	0	5	3	5	2	0	4	0	2	2	1	2	4	0	1	1	2	4	2	2	1	3	0	5	1	3	1	1	5		1	1	1	3	3	1	5	5	1	2	1
dog278	1	2	28	1	60	19	1	2	0	3	3	1	1	1	0	0	2	1	1	0	2	0	3	1	3	4	3	2	3	3	0	3	3	2	2	1	5	4	2	3	5	2	4	1	5	4	2	3	2
dog279	0	1	168	6	23	8	2	2	0	3	3	1	2	0	2	0	2	1	1	0	2	0	1	2	3	4	2	1	2	2	1	2	4	5	1	3	3	2	1	2	2	5	1	3	3	5	1	5	1
dog280	0	1	123	5	60	35	2	1	0	4	3	1	4	0	4	0	2	2	1	1	3	1	3	2	2	4	2	2	2	3	0	5	1	2	1	1	5	3	1	1	3	1	5	3	3	5	1	5	1
dog282	1	2	130	5	55	42	1	2	0	5	2	4	3	1	0	0	2	4	2	1	2	0	3	1	3	2	1	1	1	4	1	5	1	3	1	1	5	3	1	1	2	2	4	3	3	5	1	5	1
dog283	1	2	99	4	80	50	2	2	0	5	1	2	2	0	0	0	2	3	3	1	3	1	2	3	2	1	1	1	1	2	0	5	1	1	1	1	5	4	3	1	2	2	4	1	5	3	3	1	3
dog284	0	1	92	3	42	11	2	2	0	2	3	3	4	0	2	0	2	1	3	0	4	0	2	2	3	4	3	2	3	1	1	1	5	3	5	1	5	4	4	1	5	3	3	2	4	2	4	3	4
dog285	0	1	47	2	15	5	2	2	0	2	3	4	1	0	3	0	2	4	3	0	1	0	3	2	3	2	3	1	1	1	0	5	1					4			5	4	2	4	2	5	1
dog286	1	2	37	2	47	19	1	2	0	4	1	1	2	0	0	0	2	3	1	2	2	0	2	1	1	4	2	3	2	3	0	3	3	1	1	1	5		2	1	2			1	5	4	2	1	1
dog287	0	2	29	1	50	45	2	2	0	3	3	5	4	0	3	0	2	1	1	2	2	0	2	1	2	3	3	3	3	2	0	3	3	4	2	1	5	3	3	3	3	4	2	2	4	4	2	5	2
dog288	1	1	32	1	30	7	2	1	0	4	3	5	1	1	0	0	2	4	3	1	1	0	1	2	3	3	4	1	2	3	1	1	5	1	1	1	5	4	4	1	5	1	5	2	4	5	1	3	4
dog289	1	2	65	2	35	8	2	2	0	2	3	3	3	1	0	0	2	4	2	0	3	0	2	2	2	3	4	1	2	1	0	3	3	1	1	1	5	3	1	1	2	1	5	2	4	5	1	5	1
dog290	0	2	176	6	60	23	2	2	1	2	2	1	1	0	1	1	2	2	1	1	3	0	2	2	3	4	1	2	1	3	0	5	1	1	1	4	2	3	1	1	1	1	5	1	5	5	1	5	1
dog291	1	2	60	2	30	14	2	2	0	3	3	5	1	0	0	0	2	4	2	0	2	0	2	2	3	3	2	2	2	3	0	2	4	1	1	1	5	3	1	1	5	3	3	5	1	5	1	1	1
dog292	0	2	170	6	30	15	1	2	0	3	3	5	3	0	1	0	2	3	3	1	1	0	2	1	2	3	2	1	1	4	0	4	2	1	3	2	4	4	4	1	4	4	2	1	5	2	4	1	3
dog293	0	2	137	5	50	11	1	2	0	2	1	2	2	0	1	0	2	4	2	1	1	0	2	3	3	4	3	1	2	3	1	1	5	1	3	1	5	5	4	1	5	5	1	1	5	3	3	1	3
dog294	1	2	148	6	50	27	1	2	0	5	1	5	3	0	0	0	2	3	2	1	1	0	1	2	2	2	2	1	1	4	0	2	4	2	2	1	5	2	2	2	5	3	3	2	4	4	2	4	2
dog296	1	2	15	1	25	5	2	1	0	3	3	5	1	0	0	0	2	1	1	1	2	0	2	2	3	3	3	1	3	3	0	3	3	1	1	1	5	4	3	1	4	1	5	2	4	3	3	1	3
dog297	1	2	98	4	61	22	2	1	0	3	3	1	1	0	0	0	2	2	1	2	1	0	1	2	3	3	2	2	1	3	0	3	3	1	1	1	5	3	1	1	5	5	1	1	5	5	1	5	3
dog298	0	2	93	3	34	7	1	2	0	3	1	4	2	0	2	0	2	4	2	0	2	0	1	3	3	4	3	2	3	3	0	1	5	3	3	1	5	5	4	3	5	1	5	2	4	2	4	3	3
dog299	1	2	13	1	54	22	2	1	0	2	3	4	2	0	0	0	2	4	1	2	2	0	1	2	2	3	3	2	2	1	0	2	4	1	1	1	5	3	1	1	4	1	5	1	5	5	1	3	2
dog300	0	2	130	5	52	30	2	1	0	4	3	3	1	1	1	0	2	3	2	0	2	0	4	3	2	3	1	1	2	4	0	4	2	2	2	1	5	5	1	1	5	2	4	1	5	4	2	2	1
dog301	0	1	50	2	30	10	2	1	0	4	3	4	2	0	4	0	2	2	3	0	3	0	2	2	3	3	3	2	3	3	0	2	4	5	2	1	5	2	1	3	4	3	3	3	3	5	1	5	1
dog302	0	1	72	3	65	48	2	1	0	2	2	3	4	1	1	0	2	2	2	2	2	1	2	2	3	4	3	3	3	3	0	4	2	4	1	1	5	5	1	1	2	3	3	1	5	5	1	5	1
dog303	1	2	113	4	50	18	1	2	0	5	2	5	1	1	0	0	2	1	2	1	4	1	3	3	2	4	2	1	1	2	0	4	2	1	2	1	5	5	4	2	1	1	5	1	5	2	4	1	2
dog305	0	2	90	3	71	36	2	2	0	3	3	1	2	0	4	0	2	2	2	2	1	0	2	2	3	4	4	2	2	3	0	3	3	1	1	1	5	5	1	1	2	1	5	1	5	3	3	2	2
dog306	0	2	170	6	25	7	2	2	1	2	3	1	4	1	1	0	2	4	3	0	3	1	1	2	3	2	2	1	1	3	1	5	1	1	1	1	5	3	5	1	3	3	3	1	5	2	4	3	3
dog308	0	2	141	5	45	35	2	2	0	1	2	1	1	1	3	1	2	4	2	0	1	0	3	3	2	1	2	1	1	4	0	1	5	1	1	2	4	3	5	1	3	3	3	3	3	2	4	1	5
dog311	1	2	27	1	60	22	2	2	0	4	1	5	2	1	0	0	1	2	3	0	3	1	2	2	3	4	4	1	3	3	1	2	4	2	2	1	5	4	4	2	5	1	5	1	5	3	3	2	2
dog312	1	2	88	3	25	5	2	2	0	5	3	1	1	0	0	0	2	1	2	1	3	0	2	2	2	2	1	1	1	1	0	3	3	1	1	1	5	4	5	1	2	3	3	3	3	3	3	1	2
dog313	1	2	77	3	60	35	2	1	0	3	2	3	4	0	0	0	1	3	2	1	2	0	2	2	3	4	4	2	2	2	0	4	2	1	4	1	5	5	2	2	4	2	4	1	5	4	2	1	2
dog315	1	2	27	1	60	22	2	2	0	4	3	5	2	1	0	0	1	2	3	0	3	1	2	2	3	4	4	1	2	3	1	2	4	1	2	1	5	4	4	2	5	4	2	1	5	3	3	1	4
dog316	1	2	122	5	65	24	2	2	0	2	3	1	2	0	0	0	2	2	1	2	2	0	2	2	1	4	2	2	3	4	1	4	2	1	2	2	4	4	1	1	5	4	2	1	5	4	2	1	3
dog317	1	2	94	3	60	28	2	2	0	3	3	3	2	0	0	0	2	2	1	2	1	0	2	2	1	4	2	2	3	4	0	3	3	1	1	1	5	4	2	1	5	3	3	2	4	3	3	2	1
dog319	0	1	153	6	37	11	2	2	1	3	3	5	2	1	1	0	2	3	2	2	1	0	4	3	2	4	2	2	2	3	0	4	2	2	2	5	1	5	1	1	2	3	3	1	5	5	1	2	5
dog320	0	1	146	6	35	7	2	1	1	2	3	5	1	0	1	0	2	4	1	2	2	1	3	2	2	4	1	2	1	1	1	5	1	5	3	1	5	5	1	3	5	1	5	1	5	5	1	5	1
dog321	0	2	29	1	40	11	1	2	0	3	1	4	1	1	4	1	2	2	2	0	2	0	3	1	3	4	3	2	2	1	0	3	3	2	1	1	5	5	4	2	5	5	1	2	4	2	4	3	2
dog323	1	2	34	1	50	20	1	2	0	2	1	4	1	1	0	0	2	3	2	0	4	1	4	1	3	2	3	1	3	2	0	2	4	1	1	1	5	5	5	1	2	3	3	1	5	1	5	1	4
dog324	0	1	121	5	30	8	1	2	1	2	3	4	4	0	2	1	2	2	3	0	3	1	4	1	3	3	2	1	2	3	0	3	3	2	2	2	4	4	2	1	2	4	2	1	5	3	3	3	1
dog328	0	2	120	5	35	12	1	2	0	1	3	3	1	1	4	1	2	1	3	0	2	0	4	1	3	1	2	1	2	1	1	5	1	1	4	3	3	2	5	1	5	5	1	5	1	2	4	1	3
dog329	0	2	56	2	60	50	2	2	0	2	2	1	2	0	3	0	2	2	2	1	1	0	2	2	3	4	3	2	2	1	0	1	5	5	1	1	5	5	3	1	3	3	3	1	5	3	3	5	3
dog330	0	2	136	5	40	20	2	2	0	2	2	4	2	1	3	0	2	1	1	1	3	0	2	3	3	4	3	2	1	3	0	3	3	1	1	2	4	1	1	2	5	3	3	1	5	3	3	1	3
dog331	1	2	103	4	40	17	2	1	0	3	3	3	3	0	0	0	2	3	2	0	3	0	2	2	3	4	3	3	3	2	0	5	1	1	1	1	5	5	2	1	2	2	4	1	5	4	2	2	4
dog332	0	2	112	4	50	20	1	2	0	3	3	4	2	1	1	0	2	1	1	1	3	0	4	1	3	4	3	2	3	3	0	3	3	1	1	1	5	5	3	1	3	1	5	1	5	2	4	1	3
dog333	0	1	130	5	30	12	2	2	1	1	2	3	2	0	2	0	1	4	2	1	3	1	2	2	3	2	4	2	1	4	0	3	3	2	2	4	2	3	2	3	4	3	3	4	2	3	3	2	2
dog334	0	1	173	6	60	18	2	1	1	3	1	4	2	1	2	1	2	4	3	1	4	1	1	2	1	4	3	2	2	3	1	1	5	2	1	1	5	5	2	5	4	3	3	1	5	5	1	5	4
dog335	0	1	76	3	30	12	2	1	0	2	3	3	3	1	1	0	1	4	2	1	3	1	2	2	3	3	4	2	1	3	0	3	3	1	1	1	5	3	2	1	3	2	4	2	4	3	3	1	2
dog336	0	2	163	6	30	8	2	2	1	1	2	4	3	0	2	1	2	1	3	1	2	0	3	2	3	3	3	2	2	3	1	4	2	2	2	1	5	2	2	1	2	3	3	3	3	3	3	2	3
dog337	1	2	79	3	40	50	1	2	0	4	3	5	1	1	0	0	2	2	1	1	2	1	2	3	2	4	1	2	2	4	0	2	4	1	1	1	5	5	3	1	1	3	3	1	5	5	1	1	3
dog338	0	1	121	5	30	8	2	2	0	2	1	1	3	0	1	0	2	2	1	1	1	0	3	3	3	4	4	2	2	2	0	5	1	2	1	1	5	5	2	3	1	1	5	1	5	4	2	3	5
dog339	0	2	163	6	60	35	1	2	0	2	3	4	2	1	2	0	2	2	1	2	2	0	1	2	1	4	2	3	1	1	1	3	3	2	1	4	2	5	5	3	1	4	2	1	5	4	2	2	2
dog340	1	1	110	4	25	22	1	2	0	2	3	4	1	0	0	0	2	2	2	0	2	0	4	1	2	4	2	2	3	4	0	3	3	4	2	2	4	3	2	4	4	3	3	1	5	4	2	4	1
dog341	0	1	98	4	20	20	2	2	0	1	2	1	1	0	3	0	2	2	3	0	4	1	2	2	3	1	3	1	2	2	1	2	4	2	1	3	3	2	1	1	1	4	2	5	1	5	1	3	1
dog342	0	2	52	2	33	5	2	2	0	3	3	1	2	1	3	0	2	2	1	2	3	1	2	2	1	3	2	1	1	3	0	1	5	1	2	1	5	1	1	1	2	2	4	4	2	2	4	4	1
dog343	0	1	127	5	26	5	2	1	0	1	3	4	3	0	3	0	2	4	2	0	1	0	2	3	3	4	3	3	1	1	1	5	1	2	2	1	5	2	2	1	2	1	5	3	3	3	3	2	2
dog344	0	2	165	6	50	25	2	2	0	5	3	4	4	1	3	1	2	2	1	0	2	0	3	2	2	4	1	3	1	3	0	3	3	5	1	1	5	4	1	4	5	1	5	1	5	5	1	5	1
dog345	1	1	87	3	65	45	2	1	0	1	1	2	2	0	0	0	2	1	2	0	4	0	1	2	2	3	3	1	2	3	0	1	5	1	1	1	5	2	1	1	1	1	5	1	5	4	2	4	1
dog346	1	1	101	4	43	17	1	2	0	3	3	1	3	0	0	0	2	2	2	1	1	0	2	1	3	4	3	2	3	3	1	5	1	1	1	1	5	4	1	1	1	1	5	1	5	5	1	2	3
dog347	1	1	75	3	40	20	2	1	0	4	1	1	2	0	0	0	2	3	1	1	4	1	1	2	2	4	2	3	3	3	0	3	3	1	1	1	5	5	1	1	3	1	5	1	5	4	2	3	3
dog348	1	2	72	3	59	44	2	1	0	2	3	3	1	0	0	0	1	2	2	1	3	0	2	2	3	4	2	2	2	2	0	5	1	1	1	1	5	4	1	2	5	4	2	1	5	5	1	1	1
dog349	0	1	154	6	30	7	2	2	0	1	3	1	2	1	1	0	2	1	2	1	3	1	2	2	3	2	3	1	2	2	0	2	4	2	1	1	5	2	1	1	1	2	4	2	4	4	2	3	1
dog352	1	2	14	1	35	25	1	2	0	5	3	5	2	0	0	0	2	2	2	1	1	0	1	1	1	4	2	2	3	2	0	3	3	1	1	1	5	4	1	1	3	1	5	1	5	4	2	2	1
dog354	1	2	89	3	48	16	2	2	0	3	3	1	1	0	0	0	2	4	1	0	2	0	4	3	3	4	3	3	2	3	0	3	3	1	1	1	5	5	3	1	2	3	3	1	5	2	4	1	1
dog355	1	2	94	3	20	7	2	1	0	3	3	5	3	0	0	0	1	3	1	2	1	0	2	2	1	4	3	1	3	2	0	4	2	1	2	1	5	5	1	1	5	1	5	1	5	5	1	2	3
dog358	0	2	55	2	45	30	1	2	1	3	3	5	3	0	4	1	2	2	1	2	2	0	2	2	3	4	2	2	3	3	1	2	4	4	3	1	5	5	3	1	1	3	3	1	5	4	2	4	2
dog359	0	2	25	1	55	40	2	1	0	2	3	3	2	0	3	0	1	2	1	1	1	0	1	3	2	3	2	1	1	4	0	2	4	3	1	1	5	2	1	1	5	2	4	1	5	4	2	3	1
dog361	1	2	26	1	55	26	1	2	0	5	3	5	1	0	0	0	2	2	2	0	2	0	1	3	2	4	2	2	3	4	0	1	5	1	1	1	5	5	3	1	3	1	5	1	5	3	3	2	2
dog362	0	2	47	2	37	14	2	2	0	4	1	3	1	1	4	0	2	2	1	1	2	0	1	3	1	2	3	1	2	4	0	3	3		2	1	5	3	1	1	5	1	5	5	1	5	1	5	1
dog363	0	1	42	2	64	30	1	2	0	4	3	1	2	0	4	1	2	2	2	0	1	0	4	1	3	4	3	2	2	4	1	2	4	1	3	1	5	2	3	1	4	2	4	2	4	2	4	4	2
dog364	1	2	20	1	40	16	2	2	0	3	3	3	1	0	0	0	2	3	3	0	4	1	3	1	3	4	3	2	2	3	0	2	4	1	1	1	5	4	1	1	5	1	5	2	4	5	1	2	1
dog365	1	2	159	6	45	29	1	2	0	4	3	5	2	0	0	0	2	2	1	1	2	0	1	3	1	4	3	2	2	3	0	4	2	1	3	1	5	3	1	1	5	4	2	1	5	5	1	1	1
dog366	1	1	42	2	55	26	2	2	0	4	3	1	2	1	0	0	2	4	1	0	2	0	3	2	3	4	3	2	3	3	0	4	2	1	1	1	5	4	1	2	4	1	5	3	3	5	1	5	1
dog367	0	2	133	5	40	13	2	2	0	1	3	1	3	0	1	0	2	3	1	2	3	1	2	2	2	3	1	1	1	3	0	3	3	1	1	1	5	1	1	1	1	5	1	5	1	5	1	1	1
dog368	0	2	111	4	72	52	2	1	0	2	3	3	1	0	3	1	2	3	1	0	1	0	3	2	3	4	3	3	3	3	1	2	4	3	1	1	5	3	1	2	1	1	5	1	5	5	1	5	1
dog369	0	2	147	6	60	51	2	2	0	3	2	1	3	0	1	0	2	2	2	2	4	0	2	3	3	3	2	1	1	3	1	4	2	1	3	2	4	3	2	2	2	5	1	3	3	3	3	5	1
dog370	0	2	21	1	54	35	2	2	0	3	3	5	2	0	3	0	1	2	2	0	2	0	2	3	3	4	2	2	3	2	0	3	3	2	1	1	5	4	1	1	1	2	4	1	5	4	2	2	3
dog371	1	2	101	4	46	17	1	2	0	3	3	5	4	1	0	0	2	2	2	1	2	0	3	1	3	4	3	3	3	1	0	5	1	1	3	1	5	4	2	1	5	1	5	1	5	2	4	1	5
dog372	1	2	66	2	48	18	1	1	0	3	3	5	2	0	0	0	2	4	1	0	2	0	3	1	3	4	3	3	3	2	0	5	1	1	1	1	5	5	1	1	3	4	2	1	5	4	2	4	4
dog373	1	2	24	1	40	28	2	2	0	3	1	5	2	0	0	0	1	1	3	1	4	1	1	2	2	4	2	2	3	2	0	4	2	1	1	1	5	5	2	1	2	1	5	1	5	3	3	1	2
dog374	1	1	99	4	50	50	2	1	0	5	3	2	1	0	0	0	2	1	2	2	3	0	2	2	2	3	2	1	2	2	0	1	5		2	1	5	4	4	1		1	5	1	5	3	3	1
dog375	1	2	35	1	45	10	1	2	0	5	3	4	1	0	0	0	2	3	2	1	2	0	1	3	2	4	2	1	1	3	0	2	4	1	2	1	5	5	1	2	4	1	5	2	4	4	2	3	1
dog376	0	1	79	3	26	5	1	2	0	1	3	3	2	1	4	0	2	3	3	1	2	1	3	3	3	4	3	2	2	3	0	2	4	3	2	1	5	3	2	4	3	1	5	2	4	4	2	5	1
dog377	0	1	157	6	39	13	2	2	1	3	3	3	1	0	1	0	2	4	2	1	2	0	1	2	3	4	3	2	2	3	0	4	2	1	1	1	5	4	1	1	2	1	5	1	5	5	1	3	1
dog379	0	2	154	6	50	25	2	2	1	1	3	4	3	1	2	0	2	1	3	0	3	0	1	2	3	4	3	1	2	3	1	2	4	3	3	1	5	4	3	2	1	3	3	1	5	4	2	2	3
dog380	0	2	139	5	15	3	2	2	1	5	2	3	4	0	2	0	2	4	2	0	2	0	2	2	3	2	4	1	2	1	0	4	2	3	2	1	5	5	4	1	1	3	3	1	5	2	4	2	4
dog381	0	1	76	3	20	4	1	1	0	3	3	4	3	0	4	0	2	1	2	2	3	0	2	2	1	1	3	1	1	1	0	1	5	1	3	1	5	4	3	4	3	3	3	1	5	4	2	3	1
dog382	1	1	110	4	50	36	2	2	0	1	3	1	1	0	0	0	1	1	3	1	4	0	2	2	2	4	2	2	2	3	0	2	4	1	1	2	4	2	1	1	4	2	4	4	2	4	2	4	1
dog383	0	2	57	2	20	4	2	1	0	2	2	3	3	0	3	1	2	1	3	0	3	0	2	3	3	4	3	2	2	3	0	5	1	2	2	2	4	5	3	2	5	3	3	2	4	3	3	2	2
dog384	1	1	28	1	25	10	2	2	0	2	3	3	3	0	0	0	2	1	3	1	1	0	2	2	3	4	3	2	2	3	1	1	5	1	1	2	4	3	2	2	2	4	2	2	4	4	2	2	1
dog385	0	2	44	2	29	10	2	1	0	3	3	3	2	0	4	0	2	3	3	1	1	0	3	2	3	4	3	2	3	4	1	5	1	1	1	1	5	4	2	1	4	2	4	2	4	3	3	1	1
dog386	0	2	194	6	18	4	2	2	1	2	3	3	3	0	1	0	2	1	2	0	2	0	2	2	1	4	2	1	1	3	1	3	3	1	1	1	5	4	1	1	1	1	5	1	5	5	1	2	3
dog388	0	2	199	6	57	24	1	2	1	1	3	1	2	0	3	1	2	4	2	2	1	0	1	3	3	4	2	2	1	3	0	5	1	1	4	2	4	5	4	1	1	5	1	1	5	5	1	3	2
dog389	0	2	113	4	25	5	1	2	1	2	1	1	3	0	4	0	2	2	1	1	1	0	1	2	3	4	3	1	3	4	0	3	3	1	1	1	5	5	1	1	5	3	3	1	5	5	1	1	1
dog390	0	2	136	5	35	21	2	1	0	1	1	4	1	0	4	0	2	4	2	2	1	0	1	2	3	1	2	1	1	3	0	1	5	1	1	1	5	1	1	1	1	4	2	4	2	3	3	3	1
dog391	0	2	106	4	56	26	2	1	0	3	3	5	1	0	4	0	2	4	1	2	1	0	1	2	3	4	3	3	3	3	0	5	1	1	1	1	5	5	1	1	3	1	5	1	5	5	1	1	5
dog393	0	2	95	3	45	30	2	2	0	2	3	3	1	0	3	0	2	2	3	0	2	0	2	2	3	4	2	2	2	2	0	5	1	2	3	4	2	5	2	1	5	2	4	1	5	5	1	5	2
dog394	0	2	180	6	25	6	2	2	1	1	2	2	1	0	2	0	2	3	2	0	4	0	1	2	3	1	1	1	1	4	1	2	4	2	1	2	4	1	3	4	1	4	2	4	2	3	3	2	3
dog396	0	1	104	4	65	35	2	2	0	4	3	3	2	0	4	0	2	1	1	0	3	0	2	2	1	4	2	2	2	3	0	4	2	4	3	1	5	3	1	1	4	3	3	1	5	4	2	5	2
dog397	0	2	121	5	50	30	1	2	1	1	2	4	3	0	2	0	1	2	2	0	2	0	4	1	3	1	2	1	2	4	0	3	3	1	1	2	4	1	2	1	1	4	2	1	5	2	4	2	1
dog399	1	2	22	1	45	20	1	2	0	2	3	2	1	0	0	0	2	1	3	0	2	0	3	1	3	4	3	2	3	3	1	2	4	1	1	1	5	4	1	1	5	3	3	1	5	5	1	3	1
dog400	0	2	138	5	25	12	2	1	0	2	2	1	4	0	1	0	2	1	2	1	3	0	2	1	2	4	2	1	2	2	0	5	1	1	2	1	5	4	2	1	3	4	2	5	1	2	4	2	1
dog401	1	1	50	2	50	10	1	2	0	1	3	4	2	1	0	0	2	1	2	1	3	0	4	1	3	2	2	1	2	3	0	3	3	5	4	1	5	3	4	1	4	4	2	1	5	2	4	5	5
dog402	0	2	97	4	65	28	1	2	0	5	3	4	2	0	4	0	2	1	3	0	4	0	1	1	2	4	3	1	3	3	0	2	4	3	1	1	5	3	1	2	5	2	4	1	5	4	2	4	1
dog403	0	2	105	4	50	25	2	2	1	3	3	3	1	1	4	0	2	2	1	2	3	0	4	3	1	3	3	1	2	1	0	3	3	2	1	3	3	2	1	1	3	3	3	4	2	4	2	3	3
dog404	1	2	34	1	50	15	1	1	0	1	3	4	2	0	0	0	2	1	2	0	3	1	1	1	3	4	3	2	3	3	0	3	3	2	2	1	5	3	2	2	2	1	5	1	5	4	2	5	2
dog405	0	1	39	2	60	29	2	2	0	3	1	1	2	1	4	1	2	1	2	1	1	0	3	1	3	2	3	2	3	3	0	2	4	1	3	1	5	3	2	1	4	2	4	1	5	4	2	4	2
dog406	0	1	186	6	55	28	1	1	1	2	3	3	3	1	3	0	2	2	2	2	4	0	4	1	3	3	1	1	1	3	0	4	2	1	2	1	5	5	4	1	1	5	1	1	5	3	3	1	1
dog407	0	2	147	6	28	9	2	1	1	3	2	2	2	1	4	0	2	3	1	2	4	1	1	2	3	3	4	1	2	3	1	4	2	5	3	4	2	2	1	1	2	3	3	1	5	5	1	5	2
dog409	0	1	102	4	30	12	2	2	1	1	2	1	4	0	3	1	2	3	3	2	1	0	1	2	3	4	3	2	3	2	1	3	3	1	1	1	5	5	1	1	1	3	3	1	5	5	1	3	3
dog410	0	1	100	4	66	26	1	2	0	3	3	4	4	1	4	1	2	2	2	0	1	0	4	1	3	3	3	2	2	4	0	5	1	2	2	1	5	2	2	1	2	5	1	2	4	2	4	5	4
dog411	1	2	98	4	45	22	2	1	0	1	3	4	1	1	0	0	2	1	2	0	4	0	2	3	2	4	1	3	2	3	0	2	4	1	1	2	4	5	1	1	4	2	4	1	5	4	2	4	2
dog412	1	1	32	1	35	8	2	1	0	3	1	5	1	0	0	0	2	4	2	1	1	0	2	2	3	4	3	2	3	2	0	5	1	1	1	1	5	4	1	1	2	1	5	1	5	5	1	2	2
dog414	1	1	16	1	50	10	2	1	0	5	3	2	2	0	0	0	1	3	2	0	2	0	1	3	2	2	2	1	1	4	0	3	3	2	2	1	5	2	1	2	2	1	5	1	5	4	2	4	2
dog415	0	1	137	5	25	10	2	1	1	3	2	3	3	0	2	0	2	1	3	0	2	0	3	2	3	3	3	1	2	4	0	3	3	1	1	2	4	4	1	1	1	2	4	1	5	5	1	2	3
dog416	1	2	114	4	40	24	1	2	0	3	3	1	4	1	0	0	1	2	1	2	2	0	2	1	3	4	2	2	3	4	0	3	3	2	1	1	5	5	4	3	3	4	2	2	4	3	3	3	3
dog418	0	2	170	6	60	19	2	2	1	1	3	2	4	0	1	0	2	4	3	0	2	1	1	2	3	4	2	2	1	3	1	3	3	1	1	1	5	4	2	1	2	5	1	2	4	2	4	1	4
dog419	1	2	80	3	30	6	2	2	0	3	3	1	1	1	0	0	1	1	2	0	1	0	4	1	3	1	3	1	1	3	0	4	2	1	1	2	4	1	1	2	5	1	5	3	3	3	3	1	1
dog420	1	2	54	2	60	30	2	2	0	5	3	4	3	1	0	0	1	1	2	2	2	0	4	1	2	3	1	1	1	4	0	4	2	1	2	1	5	4	3	3		1	5	1	5	3	3	2	2
dog422	1	2	57	2	56	20	1	2	0	3	2	3	3	1	0	0	2	1	3	0	2	0	1	1	3	4	3	2	3	4	0	2	4	1	2	1	5	5	3	2	4	1	5	2	4	3	3	2	4
dog423	0	1	169	6	68	38	2	2	1	1	1	4	4	0	4	1	2	2	1	1	4	1	4	3	2	3	1	2	1	3	1	5	1	3	2	5	1	4	5	1	2	4	2	4	2	5	1	5	1
dog424	0	2	96	4	40	8	2	2	0	1	3	4	3	0	1	0	2	1	2	0	3	0	1	3	2	2	2	1	2	2	0	1	5	1	1	1	5	1	1	1	5	1	5	5	1	3	3	1	1
dog425	0	1	135	5	27	9	1	1	0	3	3	4	2	0	1	0	2	3	2	0	2	0	2	3	1	4	2	1	3	2	0	4	2	2	1	2	4	4	2	2	5	2	4	5	1	5	1	4	1
dog426	0	2	102	4	20	5	2	2	0	2	3	1	4	1	2	1	2	2	3	0	3	1	2	1	3	2	3	1	2	3	0	4	2	2	2	1	5	3	2	1	5	1	5	1	5	4	2	2	2
dog427	0	2	102	4	40	35	2	2	0	2	2	1	2	1	4	0	2	2	2	0	2	0	4	3	2	4	3	2	2	1	0	3	3	1	2	1	5	4	3	1	4	2	4	1	5	3	3	1	1
dog428	1	1	96	4	52	7	1	2	0	2	1	2	4	0	0	0	2	3	1	2	1	0	3	1	3	4	2	2	3	3	1	3	3	5	5	1	5	3	1	1	5	1	5	3	3	5	1	5	1
dog429	0	1	159	6	45	23	1	2	1	1	1	1	3	1	4	0	2	1	3	0	1	0	4	1	3	3	3	3	3	4	0	5	1	4	1	2	4	2	1	1	1	5	1	2	4	4	2	5	1
dog430	0	1	206	6	15	10	1	2	1	2	2	3	2	1	1	0	2	4	2	2	4	1	4	1	1	3	3	1	2	3	1	5	1	4	4	3	3	2	5	2	2	3	3	4	2	5	1	5	2
dog431	0	2	124	5	30	25	2	2	0	4	2	3	4	0	1	0	2	2	3	0	2	0	1	2	3	2	2	1	1	4	0	5	1	1	1	1	5	4	1	1	1	2	4	1	5	5	1	1	1
dog432	1	2	155	6	30	7	2	2	0	2	2	2	2	0	0	0	2	1	3	0	2	0	2	2	3	2	3	1	1	2	0	4	2	2	2	2	4	2	4	1	3	3	3	2	4	3	3	2	3
dog433	0	2	111	4	53	29	2	2	0	2	3	1	3	0	1	1	2	4	1	2	4	1	2	2	1	4	3	2	2	3	1	1	5	3	1	1	5	2	1	1	3	5	1	1	5	4	2	4	1
dog435	0	2	169	6	42	13	1	2	1	2	1	2	1	0	0	0	2	1	1	1	3	0	3	3	1	4	2	3	3	3	0	3	3	1	5	1	5	3	1	1	5	3	3	1	5	5	1	3	3
dog436	0	2	97	4	38	9	2	2	0	2	1	2	1	1	4	0	2	1	1	1	3	0	3	2	1	4	2	3	3	3	0	5	1	1	1	1	5	5	3	4	5	3	3	1	5	2	4	1	3
dog437	0	2	134	5	37	14	1	2	0	2	3	3	2	0	1	0	2	4	2	2	4	1	2	2	2	3	1	1	2	3	0	3	3	3	5	1	5	2	4	3	3	1	5	1	5	2	4	2	3
dog438	0	1	193	6	42	15	2	2	1	3	3	3	1	0	4	1	1	4	1	1	2	0	4	2	3	4	3	2	2	2	1	5	1	1	1	2	4	1	1	1	1	5	1	1	5	3	3	1	3
dog439	1	1	156	6	65	37	2	1	0	5	2	3	2	0	0	0	2	2	3	1	2	0	4	3	1	1	3	1	1	3	0	4	2	3	1	1	5	3	1	2	5	3	3	4	2	5	1	5	1
dog440	0	2	86	3	30	10	1	2	0	3	3	3	3	1	3	0	2	3	2	0	1	0	4	1	3	2	3	2	3	3	0	4	2	4	3	1	5	4	1	2	5	1	5	1	5	4	2	4	4
dog441	0	2	176	6	55	20	2	2	1	5	3	3	2	0	3	0	1	4	2	2	2	0	2	2	2	4	1	1	1	3	0	5	1	1	1	3	3	3	4	1	2	2	4	3	3	4	2	1	2
dog442	0	2	159	6	70	45	1	2	1	2	2	5	3	1	2	0	2	4	1	0	2	0	3	1	3	4	3	1	2	3	0	5	1	2	1	2	4	4	2	1	2	3	3	1	5	5	1	2	2
dog443	0	1	117	4	65	34	1	2	0	3	3	2	4	0	1	0	2	2	2	2	2	0	2	3	1	4	4	2	2	2	0	5	1	3	1	1	5	5	1	1	3	4	2	1	5	5	1	4	3
dog444	0	1	132	5	41	12	2	1	0	3	3	1	2	0	1	0	2	4	1	2	1	0	2	2	1	4	3	2	2	1	0	3	3	4	2	1	5	4	2	1	2	1	5	1	5	5	1	5	2
dog445	0	2	124	5	50	30	2	2	1	5	3	3	1	0	2	0	2	4	2	2	2	0	3	2	2	1	2	1	1	1	0	2	4	3	2	4	2	3	4	3	5	2	4	1	5	3	3	2	2
dog447	0	1	73	3	15	10	2	2	1	5	2	3	1	1	1	0	2	4	2	2	2	0	1	2	2	4	2	1	1	1	0	3	3	3	5	1	5	4	1	2	5	1	5	1	5	5	1	3	1
dog448	0	2	124	5	43	19	2	2	0	3	3	1	2	0	3	0	2	3	1	1	2	0	4	2	3	4	3	2	3	2	0	5	1	4	1	1	5	5	1	1	5	3	3	1	5	5	1	4	1
dog449	0	2	103	4	45	27	2	2	1	3	1	5	3	0	3	0	2	2	2	0	2	0	4	3	3	4	3	1	2	3	0	3	3	2	2	1	5	4	1	1	2	3	3	1	5	5	1	2	2
dog450	0	2	128	5	30	8	2	2	0	1	3	4	1	0	3	0	2	4	3	0	4	1	2	2	3	1	2	1	1	3	0	3	3	5	3	3	3	1	1	1	5	3	3	4	2	5	1	5	1
dog451	1	1	94	3	45	32	2	1	0	4	3	4	2	0	0	0	1	4	2	0	2	0	2	2	3	4	3	1	3	3	0	1	5	1	1	1	5	5	2	1	2	5	1	1	5	4	2	3	4
dog453	0	1	158	6	55	30	2	2	1	2	3	1	2	1	3	1	2	3	1	2	4	1	3	2	1	4	2	2	1	3	0	5	1	1	3	2	4	5	2	1	1	3	3	1	5	3	3	3	1
dog454	0	1	115	4	60	18	1	1	0	3	3	1	2	1	1	0	2	4	3	0	2	0	4	1	1	4	2	2	3	4	1	5	1	1	1	1	5	2	1	1	5	1	5	5	1	4	2	2	1
dog455	0	1	163	6	43	13	2	2	1	2	3	1	2	0	3	1	2	3	1	2	4	1	2	2	3	4	2	2	1	3	0	3	3	1	4	2	4	3	1	1	1	3	3	1	5	5	1	2	1
dog457	0	2	112	4	50	20	1	2	0	2	2	1	1	1	1	0	2	3	2	0	1	0	3	1	3	4	3	2	3	4	1	2	4	2	4	1	5	4	3	1	5	2	4	2	4	3	3	4	2
dog459	0	2	109	4	33	9	2	1	1	3	3	5	1	0	4	0	2	4	2	2	2	1	2	2	1	2	2	2	1	3	1	2	4	2	3	1	5	4	4	1	4	4	2	5	1	2	4	1	4
dog460	0	1	129	5	20	8	2	2	1	3	3	4	1	0	1	0	2	3	1	1	2	1	2	3	3	4	3	3	1	3	0	5	1	5	1	1	5	5	1	1	1	1	5	1	5	5	1	5	1
dog461	1	1	52	2	30	17	1	2	0	3	1	5	1	0	0	0	2	1	2	1	2	0	2	1	3	4	2	2	3	3	0	5	1	1	1	1	5	5	3	1	5	2	4	1	5	3	3	1	2
dog462	0	2	132	5	68	23	2	2	0	4	3	2	3	1	2	0	2	3	1	1	3	1	4	1	1	4	3	1	2	3	1	4	2	1	4	1	5	3	4	1	2	5	1	3	3	3	3	2	1
dog463	1	1	135	5	50	7	2	2	0	3	3	5	1	0	0	0	2	1	2	1	2	0	4	1	3	4	3	1	2	2	0	2	4	1	1	1	5	4	1	1	4	3	3	1	5	4	2	3	1
dog464	1	1	21	1	55	10	1	2	0	4	2	5	1	1	0	0	2	1	2	1	2	0	1	3	3	4	3	1	3	2	0	3	3	1	2	1	5	5	2	2	5	2	4	1	5	4	2	1	1
dog465	0	2	121	5	40	13	2	2	0	5	2	3	1	1	1	0	2	3	2	2	3	0	4	2	2	3	2	1	2	1	0	1	5	1	1	3	3	4	1	1	1	5	1	1	5	5	1	1	5
dog466	0	2	97	4	55	24	2	1	0	3	1	2	1	1	1	0	2	3	2	0	3	1	3	3	3	4	3	2	2	3	0	3	3	1	1	1	5	5	3	1	5	1	5	1	5	5	1	3	3
dog467	0	2	80	3	40	23	1	2	1	3	3	3	3	1	4	1	2	1	2	1	2	0	4	1	3	4	4	2	3	3	1	2	4	1	2	1	5	5	5	1	5	3	3	5	1	1	5	2	2
dog468	1	2	14	1	30	12	2	1	0	5	3	5	2	0	0	0	2	3	2	0	2	0	2	2	2	4	3	1	3	1	0	4	2	2	1	1	5	4	2	2	1	1	5	5	1	5	1	4	1
dog469	0	1	136	5	57	35	2	1	1	3	3	4	2	0	4	0	2	1	3	1	4	0	2	2	2	2	1	1	1	3	0	5	1	3	2	3	3	3	1	1	3	2	4	1	5	4	2	3	2
dog470	0	2	156	6	43	15	1	2	1	5	3	3	2	0	3	0	2	3	1	1	2	0	3	1	1	4	1	2	2	4	0	1	5	1	1	2	4	4	1	1	4	2	4	4	2	4	2	3	1
dog471	1	1	70	2	30	16	1	2	0	2	3	3	4	0	0	0	2	2	1	2	2	0	2	1	2	1	1	1	1	1	0	4	2	1	3	1	5	3	5	1	5	1	5	1	5	5	1	3	3
dog472	0	2	94	3	40	5	2	2	0	2	3	4	3	0	4	0	2	1	3	1	2	0	2	2	3	2	2	1	2	3	0	3	3	4	3	2	4	3	5	4	5	4	2	4	2	5	1	4	1
dog473	1	1	109	4	55	38	2	1	0	3	3	2	1	0	0	0	2	2	1	0	2	0	2	2	2	2	1	1	1	2	0	3	3	3	3	3	3	1	3	3	3	3	3	3	3	4	2	4	1
dog475	1	1	133	5	35	17	2	1	0	5	3	4	2	0	0	0	2	1	2	1	4	0	2	2	2	3	2	1	1	3	1	5	1	1	1	2	4	2	1	1	2	3	3	1	5	4	2	1	1
dog476	0	1	78	3	45	23	2	1	0	3	3	4	2	0	1	1	2	1	3	1	3	0	2	2	2	4	3	2	3	2	0	4	2	2	2	1	5	4	2	1	4	1	5	1	5	4	2	3	1
dog477	1	2	13	1	50	32	2	1	0	2	2	1	4	0	0	0	2	1	3	0	2	0	2	2	2	1	1	1	2	3	1	2	4	1	2	3	3	2	2	1	4	4	2	2	4	3	3	3	2
dog478	1	2	107	4	20	7	2	2	0	1	3	3	1	0	0	0	2	4	3	0	4	0	3	3	3	4	3	1	2	2	0	4	2	2	1	1	5	2	2	1	5	4	2	2	4	4	2	3	2
dog479	0	2	104	4	40	28	1	2	0	1	2	1	4	0	3	0	2	2	2	0	2	0	4	3	3	1	3	1	2	3	0	4	2	1	2	2	4	4	1	1	1	5	1	3	3	3	3	3	2
dog480	0	2	101	4	48	35	2	1	1	2	2	4	1	0	4	0	2	1	1	1	4	1	1	2	2	2	2	2	1	1	0	5	1	1	3	3	3	1	1	1	1	5	1	1	5	5	1	3	1
dog481	0	2	77	3	35	5	1	2	0	1	3	3	2	1	1	0	2	1	2	0	2	0	3	1	3	4	1	2	3	2	1	2	4	4	4	1	5	3	3	5	5	3	3	2	4	5	1		3
dog482	0	1	121	5	20	3	2	1	0	3	3	3	3	1	2	0	2	2	2	1	2	0	3	3	2	3	3	1	1	2	0	2	4	2	5	1	5	5	1	3	3	1	5	5	1	5	1	4	4
dog483	0	1	150	6	50	25	1	1	1	1	1	4	1	0	3	0	2	1	2	1	2	0	2	2	2	3	1	2	1	2	1	5	1	1	2	2	4	5	1	1	1	1	5	5	1	4	2	3	3
dog484	0	1	66	2	25	5	2	1	0	1	3	2	4	0	1	0	2	3	3	1	1	0	2	2	3	4	4	2	2	3	0	3	3	2	1	1	5	2	2	1	4	3	3	2	4	5	1	4	2
dog485	0	2	147	6	29	4	2	2	0	3	3	1	1	1	2	0	2	3	3	2	2	0	1	3	3	3	2	1	2	2	0	3	3	1	2	1	5	3	2	1	5	1	5	2	4	5	1	1	3
dog486	0	1	32	1	35	28	2	1	0	5	3	1	4	0	3	0	2	2	3	1	2	0	1	2	2	4	4	1	2	3	0	4	2	1	1	1	5	5	1	1	5	1	5	1	5	5	1	3	1
dog487	0	1	64	2	55	40	2	2	0	1	3	3	3	1	4	1	2	2	2	0	3	0	3	3	3	3	3	2	3	1	1	5	1	1	1	1	5	1	1	1	5	2	4	5	1	5	1	1	1
dog488	0	2	72	3	50	24	2	2	0	3	3	2	2	0	4	0	2	2	2	2	3	1	2	2	3	4	3	1	1	2	0	5	1	1	1	1	5	2	3	1	3	1	5	1	5	2	4	1	1
dog489	1	2	47	2	55	30	2	1	0	3	2	1	4	0	0	0	2	3	1	1	4	1	2	2	3	4	2	3	2	3	0	5	1	1	1	1	5	5	1	1	1	1	5	1	5	5	1	1	1
dog490	1	2	26	1	53	25	2	2	0	2	3	3	1	0	0	0	2	1	2	0	2	0	2	2	3	4	3	2	3	3	0	4	2	1	1	1	5	4	2	1	2	1	5	1	5	3	3	1	1
dog492	1	1	16	1	80	40	1	1	0	5	3	5	3	0	0	0	2	1	1	0	4	0	2	2	2	3	1	1	2	4	0	3	3	1	1	1	5	2	1	1	4	2	4	1	5	3	3	2	2
dog493	0	2	71	2	30	8	2	2	0	1	2	1	3	1	3	0	2	2	2	2	2	0	4	1	3	1	3	1	1	4	0	2	4	1	1	1	5	1	1	1	1	2	4	3	3	2	4	2	1
dog494	0	1	61	2	57	25	1	1	0	5	3	4	2	1	4	0	1	2	2	0	3	0	3	1	2	2	2	1	1	1	0	2	4	3	2	3	3	2	4	2	5	1	5	1	5	4	2	3	3
dog495	0	2	108	4	30	6	1	2	0	3	3	4	2	1	3	0	2	2	1	1	2	0	1	1	3	4	2	2	3	3	0	3	3	4	4	2	4	5	4	1	4	4	2	1	5	3	3	5	4
dog497	1	1	29	1	55	40	1	1	0	2	2	4	2	0	0	0	2	1	2	0	4	0	2	3	3	3	2	1	1	3	0	2	4	1	1	1	5	2	1	1	1	2	4	3	3	4	2	4	3
dog498	0	2	83	3	33	7	2	1	0	5	3	1	4	0	1	0	2	1	1	2	3	0	2	2	2	4	3	2	2	3	0	2	4	1	3	1	5	5	3	1	4	3	3	1	5	4	2	3	2
dog499	0	2	120	5	43	9	1	2	0	4	3	1	2	1	4	0	2	1	1	2	3	0	1	1	1	4	3	3	2	4	1	2	4	4	5	1	5	4	5	1	3	2	4	1	5	3	3	3	3
dog500	0	2	96	4	60	40	2	1	1	5	3	4	1	1	4	1	2	3	2	0	2	0	4	3	3	3	1	2	1	4	0	1	5	3	3	1	5	4	3	4	5	3	3	4	2	3	3	5	4
dog501	1	2	13	1	55	30	2	1	0	5	3	1	1	0	0	0	2	1	3	1	1	0	2	2	2	4	2	1	1	3	0	3	3	1	1	1	5	3	1	1	4	2	4	2	4	5	1	3	2
dog502	1	2	106	4	27	19	1	2	0	2	3	3	2	1	0	0	2	3	2	0	2	0	1	1	3	4	4	2	2	4	0	3	3	5	2	1	5	5	3	1	3	2	4	1	5	5	1	5	1
dog503	1	1	32	1	40	15	2	1	0	4	3	2	2	0	0	0	2	2	3	0	3	1	3	3	3	4	4	2	3	3	0	2	4	1	1	1	5	3	2	1	3	2	4	2	4	3	3	1	1
dog504	0	1	72	3	50	6	2	1	0	3	3	2	3	0	4	0	2	2	2	0	4	0	2	2	3	4	4	2	1	3	0	3	3	3	1	1	5	4	1	2	2	1	5	2	4	4	2	2	3
dog505	0	2	136	5	57	29	2	2	0	2	2	2	3	0	3	1	2	1	1	1	4	0	2	2	2	4	3	2	3	2	0	3	3	1	2	1	5	4	1	1	2	3	3	1	5	5	1	1	1
dog506	0	1	18	1	30	7	2	2	0	2	1	1	3	1	3	0	2	1	3	2	1	0	2	2	3	4	2	1	3	4	1	1	5	2	2	1	5	4	2	1	5	2	4	3	3	3	3	5	1
dog507	1	1	56	2	20	3	2	2	0	3	3	1	3	0	0	0	2	1	2	1	2	0	1	2	3	4	2	1	2	1	0	4	2	3	2	1	5	1	1	2	2	1	5	5	1	5	1	5	1
dog508	0	1	89	3	58	21	2	2	0	3	1	5	1	1	3	0	2	1	3	1	4	1	3	3	3	3	4	3	3	3	0	3	3	2	3	3	3	4	1	2	3	3	3	1	5	3	3	3	3
dog510	1	1	13	1	20	5	1	1	0	2	1	3	3	1	0	0	2	2	2	0	2	0	2	2	1	4	3	3	3	3	1	2	4	1	2	1	5	3	4	1	3	1	5	3	3	2	4	1	1
dog511	1	1	31	1	50	35	2	1	0	4	3	3	1	1	0	0	2	2	2	1	2	0	3	2	2	2	3	2	2	1	0	1	5	5	2	1	5	1	1	5	3	3	3	2	4	2	4	5	1
dog512	0	1	151	6	30	10	1	1	0	4	3	4	2	0	4	0	2	1	1	0	4	0	2	3	2	4	2	1	2	3	0	3	3	2	1	1	5	4	2	1	2	2	4	5	1	4	2	3	4
dog514	0	1	186	6	50	15	1	1	1	4	3	4	1	1	2	0	2	1	2	1	2	0	4	3	2	2	2	1	2	3	1	4	2	4	2	2	4	3	2	2	1	1	5	4	2	3	3	5	5
dog515	1	2	40	2	25	7	2	2	0	3	3	2	2	0	0	0	2	1	3	0	4	0	3	2	3	3	4	1	1	1	0	2	4	2	1	1	5	3	3	2	5	3	3	4	2	4	2	1	2
dog516	1	1	24	1	20	2	2	1	0	2	3	1	4	0	0	0	1	1	3	1	2	0	1	2	3	4	3	1	2	3	0	5	1	1	2	2	4	5	4	4	3	2	4	4	2	4	2	4	2
dog517	1	2	98	4	55	28	1	1	0	3	3	3	2	0	0	0	2	1	2	1	3	0	3	3	3	4	3	2	2	3	0	3	3	1	1	1	5	5	2	1	1	3	3	1	5	4	2	1	1
dog518	0	2	50	2	40	35	2	2	1	5	2	3	1	1	4	0	2	3	2	1	1	0	2	2	3	4	1	2	1	3	0	2	4	1	1	1	5	5	3	1	1	3	3	1	5	3	3	1	4
dog519	0	2	63	2	40	4	2	1	0	1	1	1	4	1	3	1	2	2	1	1	2	0	3	2	3	3	2	2	2	3	0	1	5	3	3	2	4	3	3	4	3	4	2	1	5	1	5	2	1
dog520	1	1	42	2	50	27	2	1	0	1	1	1	1	0	0	0	1	2	1	1	2	0	2	2	3	4	2	3	3	3	0	5	1	3	1	1	5	3	1	1	5	4	2	1	5	5	1	5	1
dog521	1	1	28	1	27	3	2	1	0	4	3	2	1	0	0	0	2	1	2	1	4	0	3	2	3	2	3	1	1	2	0	1	5	1	2	1	5	2	2	2	1	2	4	3	3	3	3	2	5
dog522	1	1	120	5	40	25	1	1	0	5	1	4	1	0	0	0	1	4	1	1	2	0	1	1	2	4	3	2	3	1	1
dog524	0	2	98	4	40	45	1	2	0	1	2	3	4	1	1	0	2	4	2	2	2	0	4	1	3	3	2	2	1	3	0	5	1	1	3	1	5	4	1	1	1	5	1	1	5	5	1	5	1
dog525	0	2	45	2	78	50	2	1	0	3	1	1	2	1	1	0	2	3	1	1	2	0	2	2	3	4	3	3	3	4	0	5	1	1	2	1	5	5	2	1	1	3	3	1	5	4	2	4	1
dog526	1	1	42	2	30	5	2	1	0	2	3	3	1	0	0	1	2	3	3	1	2	0	2	2	3	2	3	1	3	2	1	4	2	1	1	1	5	4	1	1	1	1	5	1	5	4	2	2	2
dog527	1	1	30	1	50	13	1	2	0	2	1	1	1	1	0	0	2	1	3	0	4	1	3	1	3	4	3	2	3	2	0	1	5	3	4	1	5	5	4	4	5	2	4	1	5	2	4	1	2
dog528	0	1	185	6	60	25	1	1	1	2	2	4	3	1	2	0	2	1	3	1	3	0	3	1	3	1	2	1	1	3	0	5	1	1	3	3	3	2	3	1	2	1	5	3	3	3	3	1	1
dog530	1	2	45	2	50	30	2	1	0	5	3	4	2	0	0	1	2	1	2	0	4	0	2	2	3	3	2	2	2	3	0	3	3	3	2	1	5	2	2	4	4	3	3	4	2	4	2	3	3
dog531	1	2	26	1	40	12	1	1	0	3	1	3	1	0	0	0	2	1	2	0	4	0	3	1	3	4	3	1	3	3	1	2	4	2	1	1	5	4	1	2	4	1	5	1	5	4	2	4	1
dog532	1	2	52	2	32	12	2	2	0	2	3	3	1	0	0	0	2	1	3	0	2	0	4	1	3	4	4	2	3	3	0	5	1	1	1	1	5	3	1	1	4	2	4	4	2	5	1	1	1
dog533	0	2	97	4	25	6	2	1	0	4	3	1	2	1	3	0	2	1	3	1	4	0	2	2	1	4	3	2	2	3	0	4	2	2	1	2	4	3	2	1	2	3	3	2	4	3	3	3	2
dog534	0	1	12	1	55	18	2	2	0	3	1	5	3	1	4	0	2	1	1	1	2	0	2	2	3	4	3	3	3	2	1	2	4	1	1	1	5	5	3	1	4	2	4	1	5	2	4	1	1
dog535	1	2	61	2	25	6	1	2	0	2	2	2	2	0	0	0	2	3	3	0	2	0	1	2	3	2	3	1	1	1	0	5	1	3	1	1	5	5	4	1	5	5	1	1	5	3	3	1	4
dog536	1	1	30	1	62	25	1	1	0	2	3	5	4	1	0	0	2	2	2	0	4	1	3	1	3	4	2	2	3	3	0	1	5	1	1	1	5	4	1	1	2	1	5	1	5	5	1	4	1
dog537	1	2	46	2	81	52	2	1	0	3	3	1	3	0	0	0	1	3	2	0	2	0	2	2	1	4	3	3	3	4	0	5	1	1	1	1	5	5	1	1	1	1	5	1	5	5	1	3	1
dog538	0	1	161	6	50	15	1	1	1	5	3	4	2	1	2	0	1	4	2	2	3	1	3	1	2	1	1	1	1	1	1	5	1	3	3	2	4	2	2	1	1	1	5	2	4	3	3	3	3
dog539	0	1	169	6	60	40	2	1	1	1	1	3	3	0	2	1	2	1	2	0	4	0	2	3	2	2	2	1	2	3	0	2	4	4	4	4	2	2	4	5	1	1	5	1	5	2	4	4	2
dog540	0	1	85	3	56	48	1	1	1	2	3	4	4	1	4	0	2	3	2	0	2	0	1	3	1	3	2	2	2	2	0	5	1	4	4	4	2	1	5	1	5	4	2	5	1	5	1	5	4
dog541	1	2	110	4	60	21	2	2	0	3	1	3	2	0	0	0	2	4	1	2	2	0	4	3	1	3	3	2	2	1	0	5	1	1	2	1	5	5	2	1	5	1	5	1	5	1	5	5	4
dog542	0	2	84	3	65	28	2	2	0	5	3	5	3	0	4	0	2	3	1	2	1	0	2	2	1	4	2	2	1	2	0	3	3	1	3	1	5	5	1	1	5	1	5	3	3	5	1	1	4
dog543	1	2	72	3	46	32	1	2	0	5	2	1	3	1	0	0	1	4	2	0	2	0	2	3	2	1	1	1	1	3	0	3	3	2	1	1	5	1	1	2	5	1	5	5	1	5	1	2	2
dog544	0	2	91	3	30	6	2	1	0	1	3	1	2	0	3	0	2	3	1	1	2	0	3	2	3	3	3	2	2	2	0	4	2	1	1	1	5	3	3	1	2	4	2	2	4	4	2	2	4
dog545	1	2	40	2	40	15	2	1	0	2	3	4	2	0	0	0	2	1	2	1	4	0	1	3	2	4	1	1	1	4	0	1	5	1	3	1	5	4	1	2	5	2	4	1	5	4	2	2	1
dog546	1	1	53	2	30	28	2	1	0	5	3	3	1	0	0	0	2	3	2	0	4	1	1	1	2	4	3	2	2	3	0	1	5	1	1	1	5	3	1	3	5	1	5	1	5	2	4	4	1
dog547	1	2	70	2	52	33	2	2	0	3	3	4	2	0	0	0	2	2	2	0	2	0	2	2	2	4	2	2	3	3	0	3	3	1	1	1	5	4	4	2	5	1	5	1	5	2	4	1	2
dog548	0	1	37	2	30	4	2	1	0	2	3	2	3	0	2	0	2	2	2	0	3	1	2	2	3	3	2	1	2	2	0	3	3	1	1	1	5	3	3	1	2	3	3	3	3	3	3	1	2
dog549	0	1	110	4	24	7	2	1	0	4	3	2	1	0	1	0	2	3	1	1	2	0	1	3	3	4	4	2	2	2	0	4	2	2	1	1	5	4	2	2	5	3	3	1	5	4	2	3	2
dog551	1	1	68	2	55	22	1	2	0	3	3	3	1	1	0	0	2	3	2	1	1	0	3	1	3	4	3	2	2	3	0	5	1	1	4	1	5	5	4	1	4	3	3	1	5	3	3	3	1
dog552	1	1	36	2	20	8	1	2	0	3	3	3	1	0	0	0	2	1	2	2	3	0	4	1	3	4	3	2	3	1	1	2	4	3	1	1	5	4	1	1	5	1	5	2	4	5	1	5	2
dog553	0	1	12	1	15	4	1	2	1	1	3	2	1	0	4	0	2	1	1	2	3	0	2	3	3	2	2	1	1	1	1	1	5	5	5	1	5	1	5	5	5	1	5	1	5	2	4	5	1
dog554	0	2	33	1	14	6	1	2	1	2	3	3	1	1	4	0	2	1	1	2	3	0	4	1	3	1	3	1	1	1	1	2	4	1	5	1	5	1	5	1	5	5	1	5	1	4	2	2	5
dog555	0	2	145	6	25	12	2	2	0	3	2	5	1	0	1	0	2	1	3	0	3	0	2	3	2	2	3	1	3	3	1	2	4	2	1	1	5	1	1	2	3	1	5	2	4	3	3	2	4
dog556	0	1	133	5	50	25	1	1	0	5	3	3	2	0	3	0	1	2	3	2	2	0	1	2	2	1	4	2	1	1	0	3	3	2	3	1	5	2	1	3	2	3	3	5	1	4	2	3	5
dog557	0	1	145	6	40	24	2	1	1	3	3	3	1	0	4	0	2	4	3	0	3	0	2	3	1	4	2	3	1	1	1	5	1	1	1	2	4	4	1	1	2	2	4	2	4	4	2	1	1
dog558	1	1	94	3	26	6	2	1	0	5	3	1	2	1	0	0	2	3	2	2	2	0	2	2	2	2	1	1	1	3	0	1	5	1	1	1	5	3	3	1	3	3	3	3	3	5	1	5	1
dog559	0	2	29	1	60	28	2	2	0	5	3	4	2	0	4	0	2	2	2	2	4	0	2	2	2	4	3	3	3	3	0	3	3	3	2	1	5	5	4	2	3	1	5	1	5	4	2	2	4
dog560	1	2	136	5	50	12	1	2	0	5	3	4	1	1	0	0	2	3	3	1	4	1	2	1	2	4	2	1	1	1	0	5	1	5	2	1	5	5	3	2	5	1	5	1	5	3	3	2	3
dog561	1	1	17	1	42	31	2	1	0	3	3	4	2	0	0	0	1	1	2	0	2	0	1	3	2	3	3	1	3	3	1	1	5		1	1	5	3	1	1	4	1	5	1	5	4	2	2	1
dog562	0	1	52	2	35	6	2	1	1	2	3	1	4	1	4	0	2	1	3	1	3	1	2	2	3	2	4	1	3	3	0	3	3	2	2	1	5	1	2	2	5	2	4	1	5	5	1	2	4
dog564	0	1	196	6	20	8	1	1	1	1	3	2	3	0	2	0	2	4	2	0	2	0	3	1	1	1	4	2	2	2	1	3	3	2	1	1	5	1	2	1	1	5	1	5	1	5	1	2	1
dog565	0	1	149	6	44	16	2	2	1	4	3	1	4	0	3	0	2	2	1	2	2	0	2	2	1	4	2	1	1	3	1	5	1	1	2	1	5	3	1	1	1	1	5	1	5	5	1	2	3
dog566	0	1	53	2	30	14	2	1	0	4	3	3	2	1	2	0	2	4	2	1	1	0	3	3	3	3	4	2	2	3	0	5	1	1	1	1	5	5	2	1	3	1	5	3	3	4	2	3	1
dog567	1	1	62	2	74	40	2	1	0	3	3	5	2	1	0	0	1	3	1	2	4	1	4	3	2	2	2	1	2	3	0	3	3	4	3	1	5	4	2	3	4	3	3	3	3	4	2	5	1
dog568	0	2	27	1	55	6	2	1	0	4	3	3	2	1	4	0	2	1	3	1	4	0	3	1	3	2	3	1	2	2	1	3	3	2	2	2	4	2	2	2	4	2	4	2	4	5	1	4	3
dog569	1	2	50	2	50	27	2	1	0	3	3	4	2	0	0	0	2	3	1	1	2	0	2	2	1	3	3	2	2	3	0	3	3	1	1	1	5	5	1	1	4	3	3	1	5	5	1	1	1
dog570	0	2	120	5	40	10	2	2	1	4	3	2	4	1	4	1	2	2	2	2	2	0	4	1	1	2	2	1	1	3	1	4	2	1	2	1	5	2	4	1	5	3	3	1	5	4	2	2	3
dog571	0	1	110	4	26	10	2	1	0	3	3	3	3	0	3	0	2	2	2	1	2	0	2	2	3	4	3	1	1	1	0	5	1	1	1	1	5	3	1	1	1	1	5	2	4	5	1	1	1
dog572	0	2	38	2	55	27	2	1	0	3	1	1	2	0	1	0	2	3	1	1	2	0	2	2	1	4	3	2	2	3	0	5	1	1	1	1	5	5	3	1	5	1	5	1	5	4	2	3	1
dog573	1	1	93	3	25	5	2	2	0	2	3	3	2	0	0	0	2	1	2	0	2	0	2	2	1	2	2	1	2	3	0	5	1	1	1	1	5	5	1	1	5	3	3	1	5	5	1	5	2
dog574	0	1	143	5	30	12	2	2	0	4	3	3	1	0	2	0	2	4	2	0	2	0	2	2	3	4	4	3	2	1	0	5	1	1	5	1	5	5	1	1	5	1	5	1	5	5	1	5	2
dog575	0	2	106	4	45	24	1	2	0	3	3	3	4	0	4	1	2	2	1	2	3	0	1	1	3	2	3	1	1	3	1	5	1	1	3	1	5	5	4	1	1	3	3	2	4	5	1	1	3
dog576	0	1	24	1	90	76	2	2	0	3	3	5	3	0	3	0	2	1	1	1	2	0	2	2	2	1	2	2	2	3	0	3	3	1	1	1	5	3	5	5	2	3	3	2	4	4	2	2	1
dog577	1	1	30	1	25	5	2	1	0	2	3	2	3	0	0	1	2	3	2	0	3	0	2	3	3	4	4	1	2	1	0	5	1	1	1	1	5	4	1	1	4	1	5	1	5	5	1	2	1
dog578	0	1	111	4	25	8	2	2	0	2	1	5	2	1	3	0	2	1	1	1	2	0	1	3	1	2	2	2	2	3	1	1	5	4	2	3	3	3	3	4	5	3	3	1	5	3	3	4	3
dog579	0	1	171	6	20	8	2	1	1	3	3	3	3	1	3	1	2	3	2	2	2	0	4	1	3	1	3	1	1	3	0	5	1	1	1	1	5	3	1	1	1	1	5	1	5	3	3	1	3
dog580	0	1	158	6	30	10	2	1	1	5	1	4	2	1	3	0	2	2	2	1	4	0	3	3	2	2	2	1	1	2	1	5	1	1	1	3	3	1	1	1	3	4	2	3	3	3	3	1	1
dog581	1	1	80	3	25	6	2	2	0	5	2	4	2	1	0	0	2	2	2	1	4	0	3	1	2	3	3	1	1	2	0	1	5	4	4	1	5	1	1	5	3	1	5	1	5	3	3	5	1
dog583	0	1	109	4	65	46	2	1	0	5	3	2	4	0	4	0	2	4	3	2	2	0	2	2	1	4	4	2	2	3	0	4	2	5	1	1	5	3	1	3	5	3	3	1	5	5	1	5	1
dog584	0	2	40	2	30	4	2	2	0	1	3	1	1	0	3	0	2	3	2	0	2	0	2	2	3	3	3	2	2	3	0	5	1	1	2	1	5	2	4	1	2	2	4	1	5	3	3	1	3
dog585	0	2	117	4	40	9	2	2	0	2	3	3	3	0	3	0	2	4	2	1	3	0	2	2	3	4	2	1	1	1	1	2	4	2	1	1	5	5	1	3	1	1	5	1	5	3	3	3	1
dog586	0	2	98	4	35	6	2	1	0	3	3	5	2	1	1	0	2	2	1	2	2	1	4	3	3	1	2	2	2	2	0	3	3	1	3	1	5	5	1	1	1	2	4	3	3	4	2	5	1
dog587	0	1	178	6	39	38	1	2	1	3	3	1	4	1	3	0	2	2	2	0	2	0	2	3	3	3	3	1	2	1	0	5	1	1	3	2	4	4	2	1	4	3	3	1	5	3	3	1	3
dog588	1	2	75	3	50	24	1	2	0	3	2	1	2	0	0	0	2	1	1	0	3	0	1	1	3	4	3	3	2	1	1	2	4	4	2	1	5	4	3	3	3	1	5	1	5	4	2	5	3
dog589	0	1	129	5	46	7	2	2	0	3	3	1	2	1	1	0	2	1	1	0	2	0	1	3	3	4	4	2	3	3	1	4	2	1	2	2	4	5	2	1	1	1	5	1	5	4	2	1	3
dog590	0	2	157	6	20	4	2	1	1	1	1	2	2	0	4	0	2	3	2	0	2	0	2	2	3	1	2	1	1	3	1	4	2	1	1	2	4	1	5	1	1	3	3	1	5	2	4	1	1
dog596	0	1	97	4	30	10	2	2	0	3	3	3	3	0	4	0	2	3	2	2	3	1	4	3	3	4	3	1	1	3	0	3	3	1	1	1	5	3	1	1	3	3	3	1	5	3	3	1	1
dog597	0	2	170	6	50	35	1	2	1	3	1	4	1	1	3	1	2	2	2	2	4	1	1	1	3	1	1	1	1	3	1	5	1	1	1	3	3	1	1	1	3	2	4	3	3	4	2	3	1
dog598	1	1	75	3	55	35	2	1	0	3	2	3	1	0	0	0	2	3	1	2	4	0	1	2	2	1	1	1	1	3	0	2	4	1	1	1	5	1	1	1	5	1	5	1	5	5	1	2	4
dog599	0	2	99	4	20	11	2	2	0	3	2	2	2	0	1	0	2	3	2	1	1	0	2	2	3	4	3	1	2	2	1	4	2	1	1	1	5	4	3	1	1	1	5	1	5	2	4	1	4
dog600	0	2	112	4	20	6	2	2	0	3	3	2	2	1	1	0	2	3	2	1	1	0	4	1	3	1	3	1	2	2	0	5	1	1	4	1	5	2	5	1	3	2	4	3	3	1	5	1	5
dog601	0	2	111	4	52	35	2	2	0	3	3	3	4	0	3	0	2	3	2	1	2	0	2	2	1	4	3	2	2	3	1	5	1	1	1	1	5	5	1	1	3	2	4	1	5	5	1	4	5
dog602	1	1	19	1	27	5	2	2	0	2	3	3	1	1	0	0	2	2	1	2	3	1	4	1	3	4	4	1	2	1	0	3	3	2	1	1	5	4	1	1	2	1	5	1	5	4	2	3	3
dog603	0	1	152	6	55	20	2	2	1	4	3	3	2	1	2	0	2	3	2	2	1	0	4	3	2	1	2	1	1	2	1	5	1	1	1	1	5	2	3	1	1	5	1	3	3	4	2	1	2
dog604	0	2	81	3	55	20	2	2	1	2	3	3	2	1	4	0	2	3	1	2	1	0	4	1	2	1	3	1	2	2	1	5	1	1	5	1	5	4	5	1	4	3	3	4	2	1	5	2	1
dog605	0	2	140	5	48	20	2	1	0	2	3	5	4	1	3	1	2	3	2	2	3	0	2	2	1	4	2	2	2	3	0	5	1	2	1	1	5	4	1	1	4	3	3	1	5	4	2	3	1
dog607	0	1	198	6	57	31	2	2	1	3	1	1	2	0	2	1	2	2	1	1	1	0	2	1	3	3	1	1	1	4	1	2	4	1	3	1	5	4	1	1	4	3	3	2	4	5	1	1	1
dog608	1	1	145	6	45	19	1	2	0	5	3	5	4	0	0	0	1	2	2	1	2	0	2	1	2	4	2	1	2	4	0	1	5	3	2	1	5	4	3	1	2	1	5	3	3	2	4	2	3
dog609	0	1	96	4	65	50	2	1	0	5	2	1	2	0	3	0	2	1	2	0	3	0	2	2	2	3	2	1	1	3	0	4	2	1	2	1	5	3	1	1	1	2	4	1	5	4	2	3	1
dog610	1	2	102	4	22	6	2	2	0	3	3	5	1	1	0	0	2	2	1	1	3	1	2	2	3	3	2	1	2	2	0	3	3	1	1	2	4	4	1	1	5	2	4	2	4	3	3	3	3
dog611	0	1	135	5	60	28	1	2	0	3	1	1	2	0	2	0	2	2	1	1	2	0	2	3	3	4	3	1	2	4	0	4	2	2	1	2	4	3	1	1	5	2	4	2	4	5	1	4	1
dog612	0	1	122	5	40	9	1	2	1	2	3	1	1	1	2	1	2	2	3	0	1	0	2	1	3	2	2	1	2	4	0	4	2	3	1	3	3	3	2	1	1	5	1	4	2	3	3	4	2
dog613	0	2	197	6	40	21	1	2	1	1	3	4	3	1	4	1	2	4	2	2	1	0	4	1	1	1	3	1	1	3	1	3	3	1	2	3	3	2	3	1	1	2	4	1	5	2	4	1	1
dog614	0	2	114	4	20	7	1	2	0	1	3	2	3	1	2	0	2	2	2	0	2	0	4	1	3	4	3	2	3	3	1	3	3	1	4	2	4	4	4	1	1	2	4	4	2	1	5	1	5
dog615	0	1	51	2	32	10	2	1	1	3	3	5	3	0	4	0	2	1	1	0	2	0	3	2	3	3	3	2	2	3	0	3	3	1	1	1	5	4	2	1	4	2	4	1	5	3	3	2	2
dog616	0	2	100	4	59	35	2	1	1	2	2	5	3	1	1	1	2	1	1	2	3	0	2	2	2	4	2	3	2	2	0	2	4	3	4	1	5	4	5	1	2	4	2	1	5	3	3	1	2
dog617	0	1	148	6	30	10	2	1	1	1	2	2	2	1	3	0	2	1	1	2	4	0	2	2	3	1	2	1	1	1	1	5	1	1	1	3	3	1	1	1	2	2	4	1	5	2	4	1	1
dog618	1	2	19	1	45	24	1	1	0	2	3	3	2	0	0	0	2	2	2	1	2	0	1	3	3	3	3	1	2	3	0	2	4	1	1	1	5	3	1	2	4	1	5	1	5	4	2	3	1
dog620	1	2	61	2	38	14	2	2	0	5	3	3	1	0	0	0	2	3	3	1	3	1	2	3	3	4	3	1	2	3	0	4	2	1	1	1	5	2	1	1	5	3	3	2	4	3	3	1	3
dog621	1	2	78	3	55	17	2	2	0	2	1	4	2	1	0	0	2	2	2	2	2	0	2	2	3	4	3	1	2	3	0	2	4	2	1	1	5	5	2	2	5	3	3	1	5	5	1	1	1
dog622	0	2	176	6	50	25	2	2	1	1	2	1	4	1	3	1	2	1	1	1	1	0	3	2	2	2	3	2	2	2	0	5	1	4	3	3	3	2	4	1	4	4	2	2	4	2	4	4	1
dog623	1	1	13	1	58	23	2	1	0	3	3	1	3	0	0	0	2	1	1	1	1	0	2	2	3	4	3	3	3	2	0	2	4	1	2	1	5	4	1	1	4	2	4	2	4	5	1	4	1
dog624	1	1	14	1	40	10	1	1	0	5	3	4	2	0	0	0	2	1	3	0	3	0	3	3	2	1	2	1	1	3	0	2	4	1	1	1	5	5	2	1	5	2	4	1	5	5	1	1	2
dog625	0	2	55	2	60	28	1	2	0	1	3	3	1	1	3	0	2	1	3	1	2	0	4	1	2	3	2	1	3	3	0	5	1	3	1	1	5	5	3	2	5	5	1	1	5	3	3	2	1
dog626	0	1	97	4	45	12	2	2	0	4	3	4	3	1	3	0	2	1	1	1	4	0	2	2	2	4	2	3	3	3	1	4	2	2	2	3	3	4	3	2	4	3	3	3	3	4	2	2	2
dog628	0	2	68	2	20	17	1	2	0	1	3	4	1	0	3	0	2	1	2	0	3	0	1	1	3	4	3	1	2	3	0	1	5	1	1	1	5	3	1	1	5	1	5	2	4	4	2	1	1
dog629	1	2	13	1	32	5	2	2	0	3	3	1	1	0	0	0	2	3	2	0	3	1	2	2	2	1	3	1	1	2	0	4	2	1	1	1	5	2	2	1	4	1	5	3	3	4	2	3	1
dog630	1	1	51	2	45	27	1	1	0	2	1	4	3	1	0	0	2	1	2	0	4	0	3	1	2	1	3	1	3	3	1	1	5	5	3	1	5	4	5	5	1	3	3	1	5	5	1	5	1
dog631	1	1	20	1	60	30	2	1	0	3	3	4	2	0	0	0	2	1	2	0	1	0	1	2	2	2	3	1	1	4	0	2	4	1	3	1	5	1	1	1	4	1	5	1	5	3	3	1	1
dog632	1	1	37	2	70	43	2	1	0	3	3	5	3	0	0	0	2	1	3	0	2	0	1	2	3	4	2	2	2	3	0	3	3	1	1	1	5	4	1	1	2	1	5	1	5	5	1	3	1
dog633	0	2	60	2	30	7	2	2	0	2	3	2	3	0	3	0	2	4	2	2	2	0	2	3	2	1	4	2	1	1	0	4	2	1	2	1	5	4	1	1	4	3	3	1	5	4	2	2	1
dog634	0	2	127	5	57	23	1	2	0	5	3	4	3	1	4	0	2	1	3	0	4	0	3	1	1	4	1	2	2	4	1	1	5	3	5	5	1	3	3	1	5	5	1	3	3	4	2	5	4
dog635	0	1	181	6	20	6	2	2	1	2	3	2	1	0	2	0	2	3	2	0	4	1	2	2	3	1	3	1	1	2	1	1	5	1	4	1	5	4	3	1	3	3	3	5	1	2	4	1	3
dog636	1	1	73	3	55	24	1	2	0	3	3	1	2	1	0	0	2	2	1	1	2	0	2	1	3	4	3	1	2	4	0	3	3	2	3	1	5	4	4	3	4	2	4	1	5	3	3	2	3
dog637	0	1	109	4	25	5	2	1	0	3	3	5	1	1	1	0	2	3	3	2	3	1	2	2	1	3	2	1	1	2	0	3	3	2	2	1	5	2	2	1	1	4	2	1	5	5	1	5	1
dog639	1	1	39	2	45	15	1	2	0	3	3	4	1	1	0	0	2	2	2	0	2	0	4	1	3	4	3	1	3	3	0	1	5	1	3	1	5	5	1	1	5	1	5	1	5	3	3	3	4
dog640	0	1	88	3	70	61	1	2	1	5	2	3	2	1	3	0	2	1	2	1	2	0	3	3	2	3	3	1	2	3	1	3	3	1	1	1	5	5	1	2	2	4	2	1	5	4	2	3	3
dog641	1	2	12	1	60	25	2	1	0	3	1	5	2	0	0	0	2	1	2	1	2	0	2	2	1	2	4	1	3	3	1	3	3	1	3	1	5	2	3	1	5	2	4	3	3	3	3	1	1
dog642	0	2	33	1	50	16	1	2	0	1	3	1	1	1	3	0	2	2	3	1	1	0	1	1	3	2	2	1	2	3	1	2	4	2	3	2	4	2	3	5	5	1	5	5	1	4	2	5	3
dog643	1	2	40	2	75	45	2	1	0	5	3	4	2	0	0	0	2	3	2	2	4	1	1	2	2	2	2	1	1	3	0	3	3	1	1	1	5	4	1	2	1	1	5	1	5	4	2	3	1
dog644	0	2	120	5	32	32	2	2	0	4	3	1	4	0	3	1	2	4	3	1	1	0	2	2	3	4	4	2	1	3	0	5	1	2	1	1	5	5	3	1	1	3	3	1	5	3	3	2	2
dog645	0	2	172	6	30	15	2	2	1	5	3	2	1	0	1	0	2	4	2	1	4	0	3	2	2	1	2	1	1	4	1	2	4	1	1	2	4	1	4	1	1	4	2	2	4	1	5	1	1
dog646	1	2	51	2	35	12	1	2	0	2	3	5	1	1	0	0	2	4	3	0	1	0	4	1	3	1	3	2	3	3	1	3	3	1	2	1	5	4	2	3	5	2	4	2	4	4	2	2	1
dog647	0	2	82	3	20	3	2	1	0	1	3	4	1	1	1	0	2	1	2	2	2	0	4	2	2	4	3	1	1	3	0	1	5	3	2	1	5	3	4	2	1	4	2	1	5	4	2	2	4
dog648	0	1	156	6	75	35	2	2	1	1	3	3	2	0	3	1	2	1	2	2	2	0	3	2	2	1	1	2	1	3	1	1	5	1	1	5	1	1	1	1	1	5	1	1	5	3	3	2	2
dog649	1	1	53	2	40	11	2	1	0	3	1	3	2	1	0	0	1	3	3	1	2	0	2	3	3	3	3	2	3	3	0	1	5	5	1	1	5	4	1	2	1	3	3	4	2	5	1	5	1
dog651	1	2	79	3	30	6	2	1	0	4	3	4	4	0	0	0	2	1	2	0	2	0	2	2	2	3	2	1	1	3	0
dog652	1	2	45	2	50	30	1	2	0	2	3	3	2	1	0	0	2	1	2	1	4	0	3	1	2	4	3	1	3	1	0	4	2	2	1	1	5	4	3	2	5	3	3	3	3	2	4	1	2
dog654	1	1	42	2	23	7	2	1	0	3	1	3	2	0	0	0	1	2	2	1	2	1	3	2	3	3	3	1	3	2	0	5	1	1	1	1	5	4	2	1	2	2	4	1	5	5	1	4	1
dog656	0	2	128	5	63	30	2	2	1	3	3	1	4	1	3	0	2	2	2	1	4	0	4	1	3	2	3	2	1	1	0	2	4	4	1	1	5	3	1	1	3	3	3	5	1	5	1	5	2
dog657	1	2	105	4	25	6	2	1	0	1	3	4	1	1	0	0	2	1	2	0	2	0	2	2	3	2	2	1	2	3	0	2	4	1	2	1	5	1	2	2	3	1	5	2	4	3	3	2	1
dog658	0	1	39	2	23	8	2	2	0	2	2	5	3	1	3	0	2	2	2	2	2	0	3	1	3	4	1	1	2	1	0	3	3	1	3	1	5	5	3	1	5	3	3	1	5	1	5	1	1
dog659	0	2	122	5	45	20	2	2	1	1	3	5	1	1	1	0	2	1	3	1	2	0	4	3	3	2	3	1	2	3	1	4	2	3	1	4	2	1	1	1	1	4	2	2	4	4	2	4	1
dog660	1	2	63	2	35	12	1	2	0	1	3	4	4	1	0	1	2	1	1	0	4	0	4	1	3	1	4	1	2	1	0	1	5	1	4	3	3	1	5	1	1	1	5	1	5	2	4	1	4
dog661	0	1	60	2	52	56	2	1	0	4	3	3	4	0	3	0	2	2	2	1	2	0	1	2	3	4	2	2	2	3	0	3	3	1	2	1	5	4	2	1	1	1	5	3	3	4	2	3	4
dog663	1	2	135	5	50	34	2	2	0	3	2	1	2	0	0	0	2	2	3	0	1	0	1	2	3	3	3	1	1	4	0	4	2	1	1	1	5	4	1	1	2	1	5	2	4	4	2	1	1
dog664	1	2	16	1	45	20	2	1	0	5	3	5	4	0	0	0	2	1	1	2	4	0	2	2	3	2	2	1	3	1	0	3	3	1	1	1	5	3	1	1	5	1	5	2	4	5	1	4	1
dog665	0	1	144	6	23	4	1	2	1	2	2	1	4	1	1	1	2	3	1	1	2	0	4	1	3	3	2	2	3	4	1	4	2	2	3	2	4	3	3	1	1	3	3	2	4	4	2	5	2
dog666	0	1	169	6	30	10	1	2	1	1	3	3	3	1	1	1	2	2	2	1	2	0	4	1	3	2	3	1	2	4	1	3	3	5	2	3	3	4	2	3	1	3	3	1	5	3	3	5	1
dog667	0	1	114	4	40	25	1	1	0	1	3	4	4	1	4	0	2	1	2	0	4	1	3	3	2	2	2	1	2	3	0	3	3	1	2	1	5	3	4	1	5	5	1	3	3	3	3	3	3
dog668	0	2	198	6	47	23	2	2	1	2	3	1	1	1	2	1	2	2	2	1	1	0	4	1	1	1	1	1	1	4	0	2	4	1	4	4	2	2	4	1	2	3	3	1	5	3	3	1	1
dog669	1	1	56	2	30	4	2	2	0	2	3	1	2	0	0	0	2	1	2	2	4	0	2	2	3	4	3	2	3	3	0	3	3	1	1	1	5	5	3	1	1	4	2	1	5	4	2	1	1
dog670	1	2	84	3	50	20	1	2	0	3	2	5	2	0	0	0	1	2	2	1	2	0	2	1	3	3	3	1	3	3	0	5	1	2	1	3	3	5	3	1	5	3	3	1	5	4	2	1	4
dog671	0	2	102	4	20	4	2	2	1	2	3	2	2	1	1	0	2	2	2	1	3	0	4	1	3	3	2	1	1	3	0	3	3	2	1	3	3	5	3	1	4	3	3	1	5	4	2	4	3
dog672	1	1	61	2	30	6	2	2	0	1	3	4	1	0	0	0	2	1	1	0	3	0	1	2	3	4	2	2	3	3	0	1	5	1	1	1	5	3	1	1	3	3	3	1	5	5	1	1	2
dog673	1	2	55	2	45	9	2	2	0	3	3	5	1	1	0	0	2	2	2	1	2	0	4	1	3	4	4	2	2	3	0	3	3	1	1	1	5	5	1	1	5	1	5	1	5	4	2	1	2
dog674	0	2	132	5	20	5	2	1	0	3	3	1	1	0	1	0	2	2	1	0	2	0	2	3	3	4	4	2	2	3	0	3	3	1	1	1	5	5	4	1	1	1	5	1	5	3	3	4	1
dog675	0	2	79	3	45	9	2	1	0	4	3	3	1	1	1	0	2	2	2	2	3	1	3	3	3	1	3	1	1	3	0	2	4	4	3	1	5	1	3	2	5	5	1	5	1	4	2	5	1
dog676	0	2	128	5	45	13	2	2	0	3	2	1	1	1	3	0	2	2	2	2	2	0	1	3	3	4	3	2	2	3	0	3	3	1	2	2	4	5	1	1	1	5	1	3	3	5	1	2	1
dog677	1	1	131	5	27	6	2	1	0	3	3	3	1	0	0	0	2	1	1	2	4	0	1	2	3	4	3	2	2	3	0	4	2	2	2	1	5	5	1	1	5	2	4	2	4	5	1	2	2
dog678	0	1	61	2	23	3	2	1	0	1	3	3	4	0	2	0	2	3	2	2	4	1	2	2	3	4	2	1	2	2	0	2	4	3	4	1	5	3	1	3	5	2	4	2	4	4	2	4	1
dog679	1	2	14	1	30	4	2	1	0	1	3	1	2	0	0	0	2	1	1	0	2	0	2	3	3	4	4	2	3	3	1	1	5	2	2	1	5	3	3	2		2	4	3	3	3	3	5	1
dog680	1	2	34	1	23	5	2	2	0	1	3	5	1	1	0	0	2	2	3	0	2	0	2	2	3	4	4	1	3	3	1	4	2	1	3	1	5	4	3	1	4	3	3	1	5	3	3	1	3
dog681	0	1	32	1	22	10	2	2	0	1	2	3	3	1	3	0	2	2	2	0	2	0	3	2	3	2	2	2	3	3	0	3	3	2	1	1	5	2	2	1	5	2	4	2	4	3	3	2	1
dog682	0	1	87	3	71	40	2	1	0	5	1	1	2	1	3	0	2	2	2	1	4	1	2	2	2	4	2	2	2	3	0	2	4	5	2	1	5	2	1	5	5	1	5	3	3	5	1	5	1
dog683	0	2	124	5	65	36	1	2	0	2	3	4	2	0	2	0	2	1	2	1	4	0	1	2	1	4	2	2	2	2	0	3	3	2	2	2	4	4	1	1	2	3	3	1	5	4	2	3	1
dog685	0	1	83	3	53	33	2	1	0	5	3	1	1	0	1	0	1	4	2	0	3	1	1	2	2	3	4	2	2	2	0	2	4	5	3	1	5	5	2	5	2	1	5	1	5	3	3	5	4
dog686	0	1	316	6	55	35	1	2	1	3	3	4	4	0	2	1	2	1	2	1	4	0	4	1	2	3	3	1	2	3	0	4	2	1	1	4	2	1	1	1	1	5	1	4	2	4	2	1	1
dog687	0	2	119	4	35	8	2	1	0	3	3	2	1	0	2	0	2	4	2	0	2	0	4	1	3	3	3	1	2	2	1	5	1	1	1	1	5	5	5	5	1	2	4	1	5	5	1	3	5
dog688	0	2	135	5	40	14	1	2	0	4	2	3	3	1	1	1	2	1	1	0	2	0	1	3	2	4	2	2	2	3	0	4	2	2	1	2	4	2	1	1	1	3	3	1	5	4	2	2	3
dog690	1	2	31	1	40	20	1	2	0	4	3	1	3	0	0	0	2	2	2	2	2	0	3	3	2	4	2	2	2	1	0	1	5	1	1	1	5	4	1	1	1	1	5	1	5	4	2	1	1
dog692	0	2	112	4	55	47	2	2	0	3	3	1	2	0	3	1	2	2	1	1	3	0	2	2	3	2	2	2	1	3	0	1	5	4	1	1	5	1	1	1	1	2	4	2	4	5	1	5	3
dog693	1	2	45	2	35	11	2	2	0	2	3	3	3	1	0	0	2	2	3	0	3	0	4	3	3	4	3	2	3	1	0	3	3	2	2	1	5	4	1	2	5	3	3	1	5	3	3	1	1
dog694	1	1	47	2	30	7	2	1	0	5	3	4	2	0	0	0	1	1	3	1	4	0	2	3	3	4	4	2	2	1	0	5	1	3	2	2	4	5	3	5	5	3	3	1	5	5	1	3	2
dog695	0	2	43	2	50	25	2	2	0	2	3	5	2	0	3	0	2	2	2	0	2	0	2	2	1	3	3	2	2	4	0	1	5	4	2	1	5	3	1	1	4	3	3	4	2	5	1	5	1
dog696	0	2	108	4	59	28	2	2	0	2	2	3	2	0	4	0	2	2	1	1	2	0	1	3	1	4	2	2	2	1	0	4	2	1	1	1	5	4	1	1	4	2	4	1	5	3	3	1	1
dog697	1	1	14	1	20	25	1	2	0	2	3	3	3	0	0	0	2	1	2	0	3	0	2	1	3	4	4	2	3	3	0	3	3	1	1	1	5	4	1	1	4	1	5	1	5	5	1	1	1
dog698	0	2	86	3	45	28	2	2	0	3	3	1	4	0	2	0	1	3	3	0	1	0	2	2	3	4	3	1	2	2	1	5	1	1	2	3	3	5	3	1	2	4	2	1	5	2	4	1	4
dog699	1	1	63	2	70	25	1	1	0	5	1	1	1	1	0	0	2	2	1	0	4	1	1	1	2	4	2	2	2	3	0	4	2	1	1	1	5	4	1	1	5	1	5	4	2	4	2	1	1
dog700	1	2	34	1	61	20	1	2	0	3	1	2	3	0	0	0	2	3	2	2	4	1	2	1	3	4	3	2	2	3	0	4	2	1	1	1	5	4	1	1	4	1	5	1	5	4	2	1	3
dog702	0	2	155	6	56	33	2	1	1	3	3	1	3	1	3	0	2	1	1	1	2	0	2	3	2	4	2	2	2	3	0	3	3	2	1	2	4	3	1	1	3	1	5	1	5	3	3	2	3
dog703	1	2	64	2	50	16	1	2	0	3	3	1	4	0	0	0	2	2	2	1	2	0	1	3	2	4	3	2	3	3	0	2	4	2	2	1	5	5	2	1	1	1	5	5	1	3	3	3	1
dog704	0	1	35	1	35	9	1	2	0	4	2	4	1	1	3	0	2	3	2	2	3	0	2	1	3	4	3	1	2	2	1	2	4	2	3	2	4	5	3	3	3	1	5	1	5	3	3	3	4
dog705	1	1	43	2	29	5	2	1	0	3	3	5	3	0	0	0	2	1	3	1	4	0	2	2	3	3	2	2	2	1	0	1	5	3	3	1	5	3	2	3	4	3	3	1	5	4	2	4	2
dog706	1	2	28	1	63	42	2	1	0	5	3	5	2	0	0	0	2	1	2	1	4	0	2	2	2	4	2	2	3	1	0	1	5	4	2	1	5	2	1	4	5	3	3	5	1	4	2	3	1
dog707	1	1	76	3	50	50	2	1	0	5	2	4	3	0	0	0	2	2	2	1	3	1	1	3	2	4	1	1	2	3	0	5	1	1	1	1	5	2	1	1	5	2	4	5	1	5	1	1	1
dog708	1	1	78	3	60	40	1	2	0	1	2	4	1	1	0	0	2	2	2	1	3	1	4	1	2	3	2	2	1	4	1	4	2	2	2	2	4	4	3	2	5	2	4	1	5	4	2	5	1
dog709	1	1	73	3	53	33	2	2	0	1	3	4	2	0	0	0	2	1	2	1	3	0	2	2	2	4	2	2	2	3	1	1	5	3	1	1	5	4	1	1	1	1	5	1	5	4	2	3	1
dog710	0	2	115	4	50	15	1	2	0	1	3	2	2	1	4	0	2	1	3	2	2	0	2	1	3	4	3	2	2	3	1	1	5	2	3	1	5	3	1	1	1	1	5	1	5	4	2	5	2
dog711	0	1	23	1	25	3	2	1	0	2	3	2	2	1	3	0	2	2	1	2	4	1	1	3	3	1	2	1	1	2	0	3	3	2		1	5	1	1	2	1			3	3	3	3	3	1
dog712	0	1	156	6	40	10	2	1	1	3	1	1	2	1	2	0	2	2	1	2	3	1	1	2	2	1	2	3	1	3	0	1	5	5	2	1	5	5	1	4	5	1	5	1	5	5	1	5	1
dog713	0	1	210	6	41	20	2	1	0	5	3	5	1	1	1	0	2	4	1	2	3	1	1	1	1	4	4	2	3	4	0	5	1	4	1	1	5	4	1	1	5	3	3	4	2	4	2	4	1
dog714	0	1	41	2	65	45	2	1	0	5	2	1	4	0	4	0	2	3	1	2	2	0	1	2	2	4	3	3	3	1	0	4	2	2	1	1	5	5	1	1	2	1	5	1	5	5	1	2	5
dog715	1	1	27	1	50	43	2	1	0	5	3	5	2	0	0	0	1	1	2	0	4	1	2	3	2	3	2	1	2	3	0	3	3	1	2	1	5	3	1	1	4	3	3	3	3	3	3	2	3
dog716	1	1	16	1	48	40	2	1	0	4	3	5	2	0	0	0	2	1	2	0	4	1	2	3	2	1	3	1	1	2	0	3	3	3	3	3	3	4	3	4	3	3	3	4	2	4	2	3	3
dog717	0	2	152	6	30	9	2	1	0	3	1	4	2	1	4	0	2	2	2	2	2	0	1	2	1	4	2	1	1	3	0	4	2	1	1	1	5	4	1	1	4	3	3	1	5	4	2	3	1
dog718	0	1	75	3	50	42	2	1	0	5	3	5	3	1	3	1	2	1	2	1	4	0	2	3	3	4	2	2	2	3	0	3	3	5	3	1	5	4	1	1	2	4	2	2	4	4	2	5	2
dog719	1	2	29	1	50	25	2	1	0	4	3	4	2	0	0	0	2	3	2	0	2	0	2	3	2	3	2	2	2	3	0	2	4	1	1	1	5	5	1	1	5	2	4	4	2	4	2	2	5
dog720	0	1	169	6	50	18	2	2	1	3	2	5	2	1	2	0	2	2	1	2	2	0	4	1	3	1	3	1	1	3	0	2	4	1	4	1	5	1	5	1	1	1	5	1	5	1	5	1	2
dog721	0	2	181	6	40	13	2	2	0	3	2	5	2	1	2	1	2	2	1	2	2	0	4	1	3	1	3	1	1	3	0	1	5	1	5	1	5	4	5	1	1	5	1	5	1	1	5	1	2
dog722	0	1	145	6	35	8	1	2	0	3	3	5	2	1	1	0	2	2	1	2	2	0	4	1	3	4	3	2	1	3	0	3	3	2	4	1	5	4	2	1	3	2	4	2	4	4	2	5	1
dog723	0	2	169	6	50	30	2	2	1	5	1	1	4	0	2	0	2	3	1	2	1	0	2	2	2	4	3	3	2	2	1	5	1	1	2	2	4	4	1	1	2	3	3	3	3	5	1	2	4
dog725	0	1	144	6	30	9	2	1	1	2	2	4	4	1	1	1	2	1	3	0	4	0	1	2	3	4	4	1	2	1	1	1	5	3	3	2	4	4	4	2	5	3	3	4	2	2	4	2	1
dog726	1	2	72	3	60	50	2	1	0	1	2	5	2	1	0	0	2	1	2	1	4	0	2	3	2	4	2	2	3	3	0	5	1	5	2	1	5	4	1	1	4	1	5	1	5	5	1	5	1
dog728	0	1	39	2	40	33	2	1	0	5	2	1	1	0	1	0	2	1	2	1	4	0	2	2	2	3	2	1	3	3	0	3	3	1	1	1	5	3	1	1	5	1	5	3	3	5	1	3	1
dog729	1	2	120	5	50	30	2	1	0	4	3	4	1	0	0	0	1	3	1	0	2	1	1	2	2	2	2	1	1	3	0	2	4	1	2	1	5	5	5	5	5	3	3	5	1	3	3	3	3
dog730	1	2	22	1	24	5	2	2	0	1	3	1	4	0	0	0	2	3	3	1	2	0	1	2	3	1	2	2	1	3	0	3	3	2	3	2	4	3	3	2	3	2	4	3	3	4	2	4	2
dog731	0	1	120	5	40	28	1	1	1	5	3	4	3	0	3	0	2	1	3	1	4	0	3	3	2	3	3	1	1	3	0	3	3	3	1	2	4	4	1	2	1	1	5	5	1	2	4	4	1
dog733	0	1	180	6	27	11	2	1	1	1	3	3	2	1	2	1	2	2	2	0	2	0	2	2	3	1	3	1	1	3	0	3	3	4	4	3	3	2	1	4	1	4	2	1	5	5	1	5	2
dog734	0	1	194	6	40	15	1	2	1	2	3	1	4	0	1	0	2	2	1	1	3	1	2	3	3	3	3	1	1	2	0	1	5	3	1	3	3	2	2	1	4	1	5	2	4	3	3	4	2
dog735	1	2	37	2	25	5	2	1	0	3	1	5	2	0	0	0	2	1	2	2	4	0	2	2	3	3	3	1	2	3	0	3	3	2	2	1	5	2	2	2	2	3	3	3	3	4	2	4	3
dog736	1	1	47	2	25	18	1	1	0	5	3	4	3	0	0	0	2	1	2	0	3	1	2	3	2	4	3	1	2	3	0	5	1	1	3	1	5	5	3	1	5	3	3	3	3	5	1	1	5
dog737	1	2	47	2	25	6	2	2	0	2	3	4	4	0	0	0	2	1	3	0	4	0	1	3	3	2	2	1	1	3	0	1	5	1	2	1	5	4	1	5	5	1	5	5	1	5	1	5	1
dog739	1	1	41	2	46	24	2	2	0	4	1	5	3	1	0	0	2	1	1	1	4	0	4	1	1	4	3	2	3	3	0	1	5	3	5	1	5	3	5	5	4	3	3	1	5	3	3	3	5
dog740	1	1	22	1	25	5	2	2	0	3	3	2	3	0	0	0	1	4	2	0	4	1	2	2	3	2	2	1	1	2	1	2	4	1	1	1	5	2	1	1	3	1	5	2	4	5	1	3	1
dog741	1	2	72	3	40	12	1	2	0	3	3	1	1	1	0	1	2	3	3	0	3	1	2	1	3	4	3	2	3	3	0	3	3	3	3	1	5	4	3	3	2	3	3	1	5	3	3	3	3
dog742	1	2	92	3	27	13	1	2	0	5	2	4	1	0	0	0	2	3	2	2	4	1	3	3	2	3	1	1	1	2	0	5	1	4	1	1	5	5	1	2	3	2	4	3	3	5	1	4	1
dog743	0	2	63	2	50	26	2	2	0	2	1	1	2	0	4	0	2	2	2	2	2	0	2	2	3	4	2	3	3	1	0	1	5	2	3	1	5	3	3	2	5	2	4	2	4	3	3	3	3
dog744	0	1	138	5	30	5	2	2	1	2	1	3	3	1	2	1	2	4	2	0	1	0	3	3	3	4	4	1	1	1	1	1	5	5	5	1	5	5	1	5	1	5	1	1	5	5	1	5	1
dog745	1	1	26	1	60	39	2	1	0	3	3	4	2	0	0	0	2	1	3	0	3	0	2	2	2	4	3	2	3	1	0	4	2	1	1	1	5	5	1	1	5	1	5	4	2	5	1	3	1
dog746	0	2	85	3	40	39	2	2	0	2	2	4	3	0	1	0	2	1	2	2	4	0	1	2	2	4	4	2	3	1	1	4	2	2	3	1	5	4	1	1	4	1	5	5	1	5	1	3	3
dog747	0	2	82	3	30	14	1	2	0	3	3	4	4	1	3	0	2	3	3	1	2	0	4	1	2	4	3	2	2	3	0	2	4	3	3	1	5	5	5	3	5	2	4	1	5	3	3	2	4
dog748	1	1	63	2	27	7	2	2	0	3	2	2	4	0	0	0	2	1	1	2	2	0	2	2	3	2	3	1	1	3	0	2	4	1	3	1	5	3	5	1	1	2	4	2	4	1	5	1	2
dog749	0	1	93	3	23	12	1	2	0	3	3	2	1	1	1	0	2	2	3	0	2	0	2	1	3	4	4	2	2	3	0	4	2	1	1			5		3	3	4	2	1	5	2	4	1	3
dog750	1	2	116	4	25	5	2	1	0	3	3	3	3	1	0	1	2	3	2	2	4	1	1	2	3	3	4	2	1	2	0	3	3	1	1	1	5	5	3	3	5	1	5	1	5	5	1	5	3
dog752	1	2	92	3	25	7	2	2	0	1	2	5	1	1	0	0	2	4	2	1	1	0	1	3	3	1	3	2	1	3	0	2	4	1	2	1	5	2	1	5	5	5	1	1	5	1	5	5	1
dog753	1	1	18	1	40	7	1	2	0	2	1	4	1	0	0	0	2	4	3	0	2	0	3	1	3	3	3	1	2	1	1	2	4	2	3	1	5	3	2	2	5	2	4	3	3	4	2	4	1
dog754	1	2	93	3	45	10	1	1	0	5	3	3	2	1	0	0	2	1	1	2	3	1	1	1	2	4	3	2	2	1	0	3	3	1	1	1	5	4	1	1	3	3	3	1	5	4	2	4	2
dog755	0	2	67	2	66	42	2	2	0	1	1	1	2	1	3	0	2	1	1	2	4	1	2	2	2	4	2	2	2	3	0	3	3	3	3	3	3	5	3	2	1	4	2	1	5	3	3	4	3
dog756	1	1	20	1	70	35	2	1	0	4	3	1	4	0	0	0	2	1	1	2	2	0	2	2	3	4	3	3	3	3	0	3	3	3	1	1	5	4	1	1	4	1	5	1	5	5	1	5	3
dog757	1	2	109	4	58	20	2	1	0	3	3	5	4	0	0	0	2	2	1	2	3	0	2	2	2	4	2	3	2	3	0	3	3	2	2	1	5	4	2	3	4	2	4	3	3	4	2	4	2
dog758	0	1	46	2	64	36	2	2	0	3	3	1	2	1	4	0	2	3	2	1	4	0	1	3	1	4	3	2	3	2	0	1	5	4	3	1	5	1	5	3	5	3	3	2	4	4	2	4	1
dog760	0	1	66	2	57	24	1	2	0	4	3	4	3	1	3	0	2	2	1	1	4	0	1	3	3	4	3	3	3	2	0	2	4	1	5	1	5	4	5	1	3	2	4	1	5	1	5	2	2
dog761	1	2	61	2	30	13	1	2	0	4	2	4	1	0	0	0	2	1	3	0	4	0	1	3	3	3	4	1	1	2	0	3	3	3	3	2	4	4	4	3	4	3	3	1	5	3	3	2	4
dog762	1	2	86	3	30	24	1	2	0	5	2	3	2	1	0	0	2	2	3	0	1	0	4	1	3	3	4	2	2	4	0	4	2	2	1	1	5	5	1	1	1	3	3	1	5	4	2	2	2
dog764	1	1	21	1	65	42	2	1	0	3	3	2	2	0	0	0	2	3	1	2	3	1	3	2	2	4	3	2	3	3	0	3	3	2	1	1	5	3	1	3	5	1	5	1	5	5	1	5	1
dog765	1	1	62	2	60	38	2	2	0	4	3	1	2	0	0	0	2	4	2	1	2	0	2	3	1	4	3	2	2	3	0	2	4	1	1	1	5	3	3	1	4	1	5	1	5	3	3	3	1
dog767	1	1	23	1	50	20	1	2	0	2	3	4	1	0	0	0	2	1	2	0	3	0	3	1	2	4	2	1	2	3	0	1	5	1	3	1	5	5	5	1	2	2	4	1	5	3	3	1	1
dog768	1	2	27	1	30	25	2	1	0	5	3	1	2	1	0	0	1	1	3	2	3	1	2	2	2	4	2	2	3	1	0	5	1	1	1	1	5	5	4	1	5	1	5	1	5	3	3	1	3
dog769	1	1	45	2	27	12	2	1	0	3	3	3	3	0	0	0	2	2	2	0	2	0	2	2	3	3	3	2	2	3	0	5	1	1	1	1	5	5	1	1	3	3	3	1	5	1	5	3	1
dog771	0	2	13	1	13	7	1	1	0	1	3	2	1	0	3	0	2	1	2	1	2	1	3	3	3	1	2	1	1	4	0	3	3	1	1	3	3	1	1	1	5	1	5	5	1	5	1	3	1
dog772	0	2	182	6	30	9	1	2	1	4	1	2	2	1	4	0	2	2	3	1	4	1	3	3	3	3	1	1	1	2	0	2	4	1	4	2	4	1	5	1	1	2	4	1	5	2	4	5	4
dog773	0	1	108	4	60	25	2	2	1	3	1	1	1	1	3	0	2	1	2	0	2	1	4	1	3	3	3	1	1	3	0	1	5	3	4	1	5	3	1	1	1	5	1	1	5	5	1	4	1
dog774	0	1	77	3	40	19	2	1	0	4	3	1	1	0	4	0	2	2	2	0	1	0	2	2	3	1	4	1	2	3	0	2	4	3	2	1	5	1	2	2	5	4	2	2	4	4	2	5	3
dog775	0	2	122	5	30	22	2	2	0	3	3	1	2	1	3	0	2	2	1	2	1	0	4	2	3	2	2	1	1	3	1	3	3	1	2	2	4	2	2	1	1	3	3	1	5	2	4	1	1
dog776	1	2	151	6	30	10	2	1	0	4	3	2	1	0	0	0	2	1	2	1	4	0	2	2	3	3	2	1	2	2	1	3	3	4	4	2	4	5	5	4	5	3	3	1	5	2	4	5	3
dog777	0	1	111	4	40	13	1	1	0	5	2	5	1	1	1	0	1	1	1	2	4	0	1	2	2	2	3	1	1	3	0	4	2	2	1	1	5	5	3	4	5	5	1	1	5	4	2	5	4
dog778	0	2	94	3	40	19	1	2	0	1	3	1	2	1	4	0	2	3	2	1	2	1	4	1	3	1	1	1	1	3	0	2	4	3	3	3	3	2	2	4	2	2	4	3	3	2	4	2	2
dog779	1	1	19	1	30	4	2	2	0	2	1	2	1	0	0	0	2	2	2	0	4	1	2	2	3	2	3	1	2	3	0	2	4	1	1	1	5	1	1	1	3	1	5	4	2	5	1	3	3
dog780	0	2	15	1	28	11	2	2	0	2	3	5	2	0	3	0	2	1	2	1	2	0	2	2	3	3	3	1	2	3	0	3	3	4	2	1	5	3	1	1	3	1	5	3	3	5	1	4	1
dog781	0	1	159	6	58	30	2	2	0	2	1	2	2	0	1	1	2	2	1	1	3	1	2	2	3	4	3	2	1	4	1	5	1	1	1	1	5	4	1	1	2	3	3	1	5	4	2	1	1
dog782	0	1	192	6	40	8	2	1	1	5	1	4	1	1	2	0	2	1	2	1	4	0	4	1	2	2	3	1	1	3	0	3	3	3	3	2	4	5	1	2	4	5	1	3	3	5	1	4	1
dog783	0	2	147	6	27	5	2	2	0	3	3	3	3	0	2	0	2	4	2	1	2	0	2	2	1	1	3	3	1	3	1	5	1	1	1	1	5	2	1	1	2	2	4	1	5	3	3	4	1
dog786	0	2	96	4	50	9	1	2	0	2	3	3	1	1	1	1	2	2	1	0	2	0	1	1	3	3	2	2	2	2	1	1	5	5	4	1	5	4	5	4	2	3	3	1	5	5	1	5	4
dog787	0	1	61	2	33	12	2	1	0	1	2	5	4	0	3	1	1	1	3	0	3	0	2	2	3	2	3	1	2	2	0	1	5	3	3	3	3	2	4	2	3	4	2	4	2	3	3	3	3
dog788	0	1	80	3	75	50	2	1	1	5	2	3	3	0	4	0	2	3	2	1	4	0	1	2	3	4	4	3	1	1	0	1	5	2	2	1	5	2	1	2	1	1	5	1	5	2	4	2	1
dog789	1	1	85	3	69	35	2	1	0	5	3	1	4	0	0	0	2	1	1	0	3	0	2	2	2	4	3	2	3	3	0	2	4	2	1	1	5	2	1	1	2	1	5	1	5	4	2	3	2
dog790	1	2	19	1	58	25	1	2	0	3	3	3	4	1	0	0	2	2	1	1	1	0	4	1	3	3	3	1	2	3	1	2	4	1	4	1	5	5	4	1	4	2	4	2	4	1	5	1	1
dog791	0	1	144	6	20	5	2	1	0	1	3	1	2	0	2	0	2	1	2	1	1	0	3	2	3	4	3	1	2	3	0	4	2	2	3	2	4	3	1	1	3	1	5	1	5	5	1	4	1
dog793	1	2	12	1	25	2	2	1	0	2	3	2	1	0	0	0	2	1	2	0	2	0	2	3	3	4	2	1	3	3	0	3	3	1	1	1	5	4	1	1	5	1	5	1	5	4	2	1	1
dog794	0	1	144	6	42	19	2	2	1	4	2	3	1	1	1	0	2	4	2	1	2	0	4	1	1	1	1	1	1	3	0	3	3	3	1	1	5	1	1	2	3	4	2	4	2	3	3	4	3
dog795	0	1	61	2	42	13	1	2	1	2	2	5	1	1	2	0	2	1	3	0	3	0	4	1	3	4	4	2	3	1	1	3	3	2	5	2	4	5	5	2	5	1	5	1	5	3	3	2	3
dog796	1	1	52	2	50	40	1	1	0	5	3	4	2	0	0	0	1	1	2	0	3	0	2	3	2	3	1	1	2	3	0	3	3	2	3	1	5	2	1	1	2	1	5	1	5	4	2	4	2
dog797	0	2	130	5	80	42	2	2	0	3	3	1	4	0	3	0	2	3	2	2	2	0	3	1	3	4	3	2	1	3	0	5	1	1	1	1	5	4	2	1	2	4	2	1	5	4	2	1	1
dog798	1	1	18	1	45	30	2	1	0	1	3	4	2	0	0	0	1	1	2	1	4	1	3	2	2	3	3	1	2	3	1	1	5	5	3	1	5	2	1	1	2	2	4	1	5	2	4	4	1
dog799	0	1	58	2	30	15	2	1	0	3	3	4	2	1	1	0	2	1	1	0	2	0	1	2	3	4	4	2	2	3	1	1	5	5	1	1	5	5	1	1	5	1	5	1	5	5	1	5	3
dog800	1	2	17	1	25	3	2	1	0	3	2	3	2	0	0	0	2	1	3	1	3	1	2	2	3	4	4	2	1	3	0	3	3	1	1	1	5	5	1	3	4	2	4	1	5	5	1	1	1
dog801	0	2	74	3	30	7	1	2	0	3	3	5	4	0	3	0	2	1	1	0	3	0	2	2	3	4	4	2	2	2	0	4	2	1	1	3	3	5	3	1	3	3	3	1	5	3	3	3	1
dog802	0	2	108	4	20	11	2	2	1	3	3	3	2	0	1	1	2	2	1	1	2	0	1	2	3	4	3	3	3	2	1	1	5	1	1	3	3	2	1	1	1	4	2	1	5	5	1	2	1
dog803	1	2	87	3	50	35	2	2	0	3	3	3	2	1	0	0	2	4	2	1	2	1	4	3	1	3	3	2	2	2	0	2	4	2	1	1	5	3	1	2	4	1	5	1	5	5	1	3	4
dog804	0	1	143	5	50	38	2	1	0	2	3	3	4	0	3	1	1	2	2	0	3	0	2	2	2	4	4	2	2	2	1	1	5	4	1	1	5	4	1	4	4	1	5	4	2	4	2	4	1
dog805	0	1	104	4	17	2	2	1	0	1	3	3	3	1	2	1	2	2	2	1	3	1	1	2	3	3	3	2	2	2	1	1	5	1	3	1	5	3	1	1	3	1	5	5	1	5	1	5	4
dog806	0	2	59	2	22	7	2	2	1	1	3	4	2	0	1	1	2	1	2	0	2	0	1	2	3	3	3	1	2	3	1	2	4	4	3	2	4	1	2	1	4	2	4	4	2	3	3	3	2
dog807	1	2	85	3	70	35	2	1	0	5	3	4	2	1	0	0	2	4	2	0	3	1	1	2	3	4	1	1	2	3	0	4	2	1	3	2	4	3	5	1	2	3	3	3	3	2	4	1	3
dog808	0	2	122	5	30	13	2	1	1	3	2	2	2	1	3	0	2	1	2	1	2	0	4	1	3	3	2	1	1	4	0	5	1	1	3	4	2	5	1	1	2	3	3	1	5	3	3	1	4
dog809	1	2	43	2	40	20	1	1	0	4	2	2	2	0	0	0	2	1	2	0	3	1	2	3	3	2	3	1	2	1	0	1	5	3	2	2	4	4	2	5	3	2	4	2	4	3	3	3	1
dog810	0	2	105	4	50	35	1	1	0	3	2	3	3	0	3	1	2	4	3	1	2	0	4	1	1	4	3	2	2	2	0	5	1	2	2	1	5	5	1	3	3	2	4	5	1	5	1	5	2
dog811	0	1	134	5	25	17	1	2	0	5	2	4	3	1	3	0	2	3	3	1	3	1	3	1	2	4	2	1	1	3	0	1	5	4	3	1	5	4	1	2	5	4	2	1	5	2	4	4	1
dog812	0	1	173	6	32	6	2	2	1	1	3	3	1	0	2	1	2	4	2	0	2	0	2	2	3	2	2	1	2	3	1	1	5	3	2	1	5	1	3	4	2	2	4	4	2	4	2	2	3
dog813	0	1	196	6	15	3	2	2	1	1	1	3	4	0	3	0	2	2	1	2	2	0	2	3	3	1	2	1	1	3	1	3	3	1	1	5	1	5	5	1	1	5	1	1	5	1	5	1	5
dog814	0	2	150	6	45	21	1	2	0	2	1	5	3	1	3	0	2	2	2	1	2	0	4	1	2	4	2	1	2	2	0	3	3	1	1	1	5	1	1	1	4	2	4	1	5	3	3	3	1
dog817	1	1	78	3	25	9	2	1	0	2	3	2	1	0	0	0	2	4	3	0	2	0	4	2	3	3	3	1	2	3	0	1	5	4	1	1	5	3	1	1	1	4	2	2	4	4	2	4	1
dog818	1	2	85	3	25	11	2	1	0	5	2	4	1	1	0	0	2	3	3	1	4	1	2	3	2	1	2	1	1	3	0	2	4	5	1	1	5	3	1	1	4	3	3	2	4	5	1	4	3
dog819	0	2	29	1	30	9	2	1	0	4	3	3	1	0	3	0	2	3	2	1	4	1	2	3	1	4	4	2	3	2	0	5	1	5	2	1	5	5	1	3	5	1	5	1	5	5	1	5	5
dog821	0	2	146	6	15	9	2	1	1	1	2	2	4	0	3	0	2	4	3	1	1	0	1	2	3	1	3	1	1	4	0	1	5	1	1	1	5	1	2	1	1	3	3	1	5	1	5	1	3
dog822	0	1	132	5	30	11	1	1	0	2	3	1	3	1	1	0	2	2	2	1	2	0	4	1	2	4	2	1	1	4	0	2	4	1	2	1	5	3	4	3	4	2	4	1	5	2	4	3	1
dog823	0	1	20	1	22	3	2	1	0	2	3	3	3	0	1	0	2	1	1	0	4	0	2	3	3	4	2	1	3	2	0	5	1	1	2	1	5	5	4	1	5	3	3	1	5	5	1	5	1
dog824	0	2	102	4	35	12	2	2	0	3	2	1	1	1	1	0	2	4	2	1	4	1	4	1	3	4	2	1	3	3	1	2	4	1	3	1	5	5	2	1	3	2	4	1	5	4	2	4	1
dog825	1	2	54	2	30	15	2	2	0	3	3	2	2	1	0	0	2	2	2	1	2	0	4	1	3	4	3	1	2	3	1	3	3	1	1	1	5	5	4	1	1	3	3	1	5	3	3	2	2
dog826	0	1	46	2	60	55	2	1	0	3	1	5	4	0	4	0	2	2	2	0	1	0	2	2	3	4	4	2	3	3	0	5	1	4	1	1	5	5	1	2	4	2	4	1	5	5	1	5	2
dog827	1	1	63	2	63	21	2	1	0	2	3	3	3	0	0	0	1	2	1	0	2	0	1	2	2	4	3	3	3	2	1	3	3	1	1	1	5	5	1	1	5	2	4	4	2	5	1	5	1
dog828	0	1	55	2	55	40	1	2	0	3	3	4	3	1	3	0	2	3	1	0	3	1	3	1	2	2	2	2	2	3	0	1	5	1	3	1	5	4	4	5	5	1	5	1	5	2	4	2	1
dog829	1	2	27	1	20	2	2	1	0	5	3	3	3	0	0	0	2	4	2	2	3	0	2	3	2	4	4	2	3	2	0	4	2	2	3	1	5	5	3	3	5	4	2	3	3	3	3	3	4
dog830	0	2	173	6	50	23	1	2	1	5	3	3	3	0	4	0	2	1	2	2	4	0	2	2	2	3	2	1	1	2	1	3	3	2	2	2	4	2	3	1	3	3	3	1	5	3	3	3	3
dog832	1	1	73	3	20	2	2	1	0	3	3	2	2	0	0	0	2	4	1	1	2	0	2	3	3	3	2	1	1	2	0	5	1	4	4	5	1	4	5		3	3	3	3	3	4	2	4	4
dog835	1	2	17	1	50	20	2	1	0	5	3	1	2	0	0	0	2	1	3	0	3	1	1	3	2	4	3	1	2	3	0	2	4	1	1	1	5	5	1	1	2	1	5	1	5	5	1	1	1
dog836	0	2	122	5	55	45	2	1	0	3	2	4	3	0	2	0	2	1	2	1	4	0	2	2	2	3	2	2	1	3	0	5	1	1	1	3	3	5	2	1	1	4	2	1	5	4	2	2	4
dog837	0	2	158	6	30	8	2	1	0	1	3	2	4	0	2	0	2	4	2	1	1	0	2	2	3	2	2	1	1	3	0	2	4	1	3	4	2	3	5	1	2	4	2	5	1	2	4	1	3
dog838	0	1	38	2	45	11	2	1	0	1	2	2	3	1	3	0	2	3	2	1	2	1	1	2	3	4	1	1	1	1	0	5	1	2	2	2	4	4	4	2	3	3	3	3	3	2	4	4	4
dog839	0	2	158	6	30	8	2	2	0	1	1	2	4	0	2	1	2	4	2	1	1	0	2	2	3	2	3	1	1	2	0	2	4	4	1	1	5	2	4		3	3	3	5	1	4	2	4	1
dog840	1	1	83	3	29	12	2	1	0	4	3	5	4	0	0	0	2	4	1	1	3	0	2	3	3	4	3	2	1	3	0	5	1	5	1	1	5	5	1	1	5	1	5	1	5	5	1	5	1
dog841	0	2	112	4	50	18	2	1	0	4	3	4	2	0	1	0	2	2	1	1	2	0	2	2	2	4	4	2	2	1	0	4	2	1	1	1	5	5	4	1	4	4	2	1	5	5	1	3	2
dog842	1	2	40	2	40	12	1	2	0	5	1	4	1	1	0	0	2	2	2	0	4	1	2	1	2	3	2	1	2	3	0	3	3	1	1	1	5	5	4	1	2	2	4	1	5	2	4	1	4
dog843	1	2	24	1	40	30	2	1	0	5	3	5	1	1	0	0	2	2	2	0	2	0	2	2	2	4	2	2	2	4	1	3	3	1	1	1	5	4	1	1	5	2	4	4	2	5	1	5	1
dog844	0	2	25	1	33	6	1	2	0	2	3	3	4	1	3	1	2	1	3	0	4	0	3	3	1	4	3	1	2	2	1	3	3	2	3	1	5	3	4	2	4	1	5	3	3	4	2	3	3
dog845	0	2	111	4	27	7	2	2	0	2	1	4	4	1	3	1	2	1	1	2	2	0	1	2	3	4	3	2	3	3	0	3	3	4	2	1	5	5	1	1	5	1	5	1	5	4	2	4	5
dog846	0	1	56	2	30	9	2	2	0	4	3	3	4	0	3	0	2	4	3	1	2	0	2	2	3	4	3	2	2	2	0	4	2	1	1	1	5	4	1	1	5	3	3	1	5	5	1	3	3
dog847	0	2	166	6	30	6	1	2	1	2	1	5	4	0	1	0	2	2	1	2	2	0	2	3	3	3	2	1	1	3	0	3	3	1	1	1	5	3	1	1	5	3	3	1	5	5	1	3	1
dog848	0	1	180	6	20	12	1	1	1	3	3	4	2	0	3	0	2	4	2	2	2	0	2	3	2	1	2	1	1	2	0	2	4	2	2	2	4	1	1	2	1	2	4	2	4	5	1	5	4
dog849	0	1	150	6	40	40	2	1	1	4	3	2	4	1	3	1	2	4	2	0	2	0	1	2	3	4	4	3	1	3	1	4	2	1	2	1	5	5	2	1	1	3	3	1	5	3	3	2	1
dog850	0	1	115	4	55	31	2	1	1	3	2	5	4	0	4	0	2	2	1	2	1	0	2	2	3	4	3	2	3	3	1	3	3	2	3	2	4	4	1	3	1	3	3	1	5	4	2	4	2
dog851	1	2	25	1	45	25	2	2	0	2	3	5	4	0	0	1	2	1	3	1	4	0	2	3	3	4	3	3	3	3	0	3	3	3	3	1	5	5	4	4	4	1	5	2	4	2	4	2	3
dog852	0	1	38	2	30	15	1	1	0	2	1	5	2	0	4	0	2	1	2	0	4	0	3	3	3	3	3	1	2	3	0	3	3	1	2	2	4	3	3	1	2	2	4	1	5	3	3	1	4
dog853	1	2	50	2	50	25	1	2	0	3	1	5	4	0	0	0	2	2	1	2	2	0	2	2	3	4	3	2	3	3	1	1	5	1	1	1	5	4	1	1	2	3	3	1	5	3	3	1	1
dog854	0	1	72	3	60	30	1	2	0	2	1	5	4	1	4	0	2	2	1	2	2	0	4	1	3	1	2	1	1	3	1	3	3	3	3	1	5	1	1	1	1	1	5	3	3	4	2	5	1
dog855	0	1	15	1	25	4	2	1	0	1	3	1	3	0	3	0	2	1	3	0	2	0	2	2	3	2	3	1	2	3	0	3	3	3	3	1	5	2	1	2	2	2	4	4	2	4	2	4	2
dog856	0	2	50	2	25	6	2	2	1	2	3	2	1	1	1	0	2	2	1	1	2	0	4	3	3	3	2	1	1	3	0	4	2	1	1	1	5	3	3	1	5	3	3	1	5	3	3	2	1
dog857	0	1	73	3	30	17	1	2	0	3	3	2	3	0	3	0	1	2	2	1	2	0	2	3	3	4	3	2	2	3	0	2	4	2	1	1	5	4	1	3	5	1	5	1	5	4	2	4	2
dog859	0	1	59	2	25	6	1	2	0	2	3	3	4	0	1	0	2	2	2	1	1	0	1	3	3	4	4	3	3	3	0	3	3	3	1	1	5	4	1	1	5	2	4	1	5	5	1	3	3
dog860	0	2	55	2	22	8	1	2	0	3	3	2	3	1	4	0	2	2	3	1	2	0	3	1	3	4	4	2	2	3	0	3	3	1	1	1	5	5	2	1	5	3	3	2	4	4	2	2	2
dog861	0	2	183	6	30	6	2	2	1	1	3	3	2	0	2	1	2	4	2	1	2	0	2	2	3	2	3	1	1	3	0	3	3	1	3	1	5	2	4	1	1	4	2	1	5	3	3	1	4
dog862	0	2	119	4	33	9	2	1	0	2	3	1	3	0	3	0	2	2	3	1	3	1	2	2	3	4	3	2	2	2	0	2	4	1	2	1	5	2	2	2	3	4	2	3	3	5	1	5	2
dog863	1	2	89	3	50	8	2	1	0	5	3	4	3	1	0	0	2	3	2	0	2	0	4	3	2	1	3	1	2	3	1	5	1	1	3	1	5	1	3	1	5	1	5	5	1	4	2	3	1
dog864	1	1	38	2	50	6	1	1	0	4	3	4	1	0	0	0	2	1	2	1	4	0	2	3	2	1	2	1	1	3	0	1	5	1	1	1	5	1	1	1	2	2	4	5	1	4	2	2	1
dog865	1	2	120	5	72	50	2	1	0	5	1	4	1	0	0	0	2	3	2	0	4	1	1	2	2	3	3	2	2	3	1	4	2	1	1	1	5	2	1	1	1	3	3	2	4	5	1	2	2
dog866	0	1	131	5	40	14	1	2	1	5	3	3	2	1	4	0	2	3	2	2	1	0	1	1	3	3	4	1	2	2	1	3	3	2	4	3	3	4	2	2	5	4	2	5	1	4	2	2	2
dog867	0	1	156	6	70	40	2	1	1	2	3	3	1	1	3	0	2	2	1	1	1	1	4	1	2	2	2	1	1	3	1	1	5	3	1	1	5	5	2	5	1	1	5	1	5	1	5	3	5
dog868	0	1	196	6	20	17	2	1	1	5	3	4	2	1	3	0	2	1	2	0	3	0	2	2	2	3	3	1	1	3	1	3	3	2	2	3	3	4	1	2	2	5	1	1	5	3	3	1	1
dog869	0	1	123	5	55	26	2	1	1	3	3	1	3	0	3	0	2	2	2	1	4	1	2	2	2	3	1	1	1	2	0	1	5	1	1	1	5	4	1	2	5	2	4	3	3	3	3	3	2
dog870	0	2	180	6	55	30	2	1	1	5	3	5	2	1	3	0	2	3	2	1	4	1	1	2	2	2	2	1	1	3	1	5	1	4	1	2	4	3	2	1	4	2	4	2	4	4	2	4	1
dog871	0	1	114	4	20	3	2	1	0	2	3	4	2	0	1	0	2	2	3	0	1	0	2	2	3	3	3	1	1	4	0	4	2	3	2	1	5	4	3	3	4	3	3	2	4	4	2	3	2
dog872	0	2	99	4	60	50	2	2	0	2	2	5	1	0	4	0	2	3	2	1	2	0	4	1	2	4	1	2	1	3	1	4	2	4	3	4	2	3	1	4	4	3	3	2	4	5	1	5	2
dog873	1	1	24	1	65	34	2	2	0	5	2	4	2	0	0	0	2	2	2	1	4	1	1	2	2	4	4	2	2	3	0	3	3	1	1	1	5	5	2	3	1	1	5	1	5	5	1	3	5
dog874	1	1	70	2	38	11	2	1	0	2	3	2	3	1	0	0	2	2	1	1	2	0	1	3	3	2	3	1	2	4	0	3	3	3	4	1	5	3	4	1	3	2	4	3	3	4	2	3	2
dog875	1	2	73	3	50	27	1	2	0	4	3	3	3	1	0	0	2	2	2	1	3	1	2	3	2	4	2	2	2	3	0	1	5	1	2	1	5	4	2	1	4	2	4	1	5	4	2	3	2
dog876	1	1	20	1	45	17	2	1	0	5	3	4	4	0	0	0	2	4	2	0	1	0	2	2	3	3	3	3	1	1	0	3	3	2	1	1	5	2	1	1	2	3	3			3	3	3	2
dog877	1	2	17	1	60	17	1	2	0	4	3	3	2	1	0	0	2	1	1	0	4	0	1	3	3	4	4	2	2	1	0	2	4	2	1	1	5	4	2	2	4	3	3	1	5	3	3	4	2
dog878	1	2	43	2	50	18	2	1	0	5	3	4	1	1	0	0	2	1	2	0	4	0	1	1	2	3	2	1	2	3	0	4	2	1	1	1	5	3	1	1	1	1	5	1	5	3	3	1	1
dog879	0	1	144	6	60	34	2	1	1	2	2	3	3	0	3	0	2	2	2	1	3	0	4	1	3	3	4	2	1	3	0	5	1	1	1	1	5	5	1	1	2	4	2	1	5	2	4	1	2
dog880	0	1	149	6	60	42	1	1	1	1	3	5	3	0	2	0	2	3	3	1	4	1	2	1	2	4	1	1	2	4	0	4	2	1	1	1	5	4	1	1	1	3	3	5	1	5	1	2	3
dog881	1	1	99	4	45	20	1	1	0	4	3	4	1	0	0	0	2	2	2	1	4	1	1	3	2	2	3	1	1	2	0	3	3	1	1	1	5	4	3	2	4	3	3	4	2	4	2	3	2
dog882	1	2	32	1	50	25	2	1	0	3	3	3	1	0	0	0	2	4	2	0	2	0	2	2	2	4	3	2	3	3	0	2	4	1	1	1	5	5	1	1	2	4	2	1	5	4	2	1	1
dog883	1	2	37	2	55	28	1	2	0	2	3	1	2	0	0	0	2	3	1	1	2	0	2	3	3	3	3	2	3	3	0	2	4	4	1	1	5	5	2	3	5	2	4	1	5	2	4	2	2
dog884	1	2	25	1	22	4	2	1	0	1	1	3	4	0	0	0	2	2	2	1	3	0	2	2	3	2	4	2	2	2	0	3	3	3	2	1	5	3	2	2	3	2	4	1	5	4	2	4	3
dog886	0	1	58	2	60	18	1	2	0	4	3	3	2	1	3	1	2	1	3	1	3	0	4	1	2	2	3	1	2	4	0	1	5	1	3	1	5	1	4	1	5	2	4	4	2	3	3	3	1
dog887	1	1	144	6	64	45	1	1	0	2	2	4	2	1	0	0	1	1	2	2	2	0	2	3	3	1	2	1	1	3	0	2	4	1	1	2	4	2	1	3	3	3	3	4	2	4	2	2	2
dog888	1	1	63	2	20	5	2	1	0	1	3	4	1	0	0	0	1	1	2	1	2	0	2	3	3	1	2	1	1	3	0	3	3	4	2	2	4	2	3	4	3	3	3	4	2	3	3	4	2
dog889	0	1	76	3	40	13	2	2	0	2	3	1	3	1	4	0	2	4	3	1	2	0	1	3	3	2	2	1	2	2	0	4	2	1	1	1	5	3	3	2	5	2	4	2	4	5	1	1	1
dog890	0	1	47	2	60	52	2	1	0	4	2	3	1	1	1	0	2	1	3	1	3	0	1	2	2	4	2	2	1	2	0	3	3	3	1	1	5	5	1	3	4	2	4	1	5	5	1	5	1
dog892	1	1	60	2	20	8	2	1	0	4	3	4	3	0	0	0	2	1	2	1	4	1	1	3	2	2	3	1	2	3	0	2	4	5	2	1	5	1	1	5	5	1	5	2	4	5	1	5	2
dog894	0	1	15	1	45	29	2	1	0	3	3	3	3	0	3	0	2	1	1	0	2	0	2	2	1	4	4	1	3	3	0	2	4	1	1	1	5	4	1	1	4	2	4	1	5	5	1	2	1
dog895	1	1	145	6	20	6	1	1	0	4	3	2	1	0	0	0	2	2	2	0	2	0	2	3	3	1	2	1	2	3	0	2	4	1	4	1	5	3	4	1	5	5	1	5	1	3	3	1	2
dog896	1	2	101	4	80	60	1	1	0	5	3	4	2	0	0	0	1	2	2	2	4	0	2	3	2	2	1	1	1	1	0	5	1	1	1	1	5	5	1	5	1	1	5	1	5	5	1	1	1
dog897	0	1	142	5	35	18	2	1	0	3	2	4	4	0	4	1	2	3	1	1	3	0	4	3	3	2	3	1	2	3	1	2	4	4	2	5	1	2	3	3	2	3	3	3	3	3	3	3	3
dog898	1	1	114	4	65	40	1	1	0	3	3	3	1	0	0	0	2	2	1	2	4	1	1	3	2	3	1	1	1	4	1	4	2	1	2	1	5	4	1	1	5	3	3	1	5	1	5	1	1
dog899	0	2	21	1	17	7	1	1	0	3	1	4	2	0	4	0	2	1	3	0	1	0	1	3	3	4	3	1	1	1	1	2	4	1	1	1	5	3	1	1	5	4	2	4	2	3	3	2	3
dog900	0	1	72	3	25	8	2	1	0	4	2	4	1	1	3	0	2	1	2	1	3	0	4	2	2	2	3	1	2	1	0	3	3	1	2	1	5	2	5	1	2	5	1	4	2	3	3	3	1
dog903	1	2	72	3	43	11	1	2	0	5	3	4	1	0	0	0	2	1	2	2	3	0	1	1	1	1	3	1	2	1	0	3	3	4	3	1	5	3	2	3	2	2	4	2	4	5	1	5	3
dog904	0	2	38	2	25	18	1	2	0	4	3	4	2	0	4	0	2	1	2	2	2	0	1	1	1	3	1	1	2	3	0	1	5	1	3	1	5	4	5	3	3	3	3	2	4	2	4	3	3
dog905	1	2	72	3	45	11	1	2	0	5	1	4	1	0	0	0	2	1	2	2	3	0	1	1	1	1	3	1	2	1	0	2	4	2	2	1	5	4	2	4	2	4	2	2	4	3	3	2	3
dog906	1	1	60	2	37	7	1	2	0	5	3	4	1	1	0	0	2	1	2	2	3	0	3	1	1	1	3	1	1	1	0	4	2	2	3	1	5	1	4	1	1	2	4	1	5	3	3	3	1
dog907	0	2	109	4	59	40	2	1	0	5	2	5	1	0	4	0	2	3	3	1	1	0	2	3	2	4	3	1	2	3	0	1	5	4	2	2	4	3	1	4	4	2	4	1	5	4	2	5	1
dog908	1	2	111	4	52	24	2	1	0	3	3	1	1	0	0	0	2	1	1	2	3	0	1	2	2	4	4	3	1	1	0	5	1	1	1	1	5	5	1	1	1	1	5	1	5	5	1	4	3
dog909	1	2	76	3	25	6	2	1	0	4	2	4	2	0	0	0	2	3	2	0	2	0	4	1	1	4	3	1	2	2	0	2	4	2	1	1	5	5	1	5	5	1	5	5	1	5	1	4	1
dog910	1	2	140	5	35	12	1	1	0	1	2	2	1	0	0	0	2	1	2	0	2	0	1	3	3	2	2	1	2	3	1	3	3	1	1	1	5	4	3	1	1	5	1	2	4	3	3	2	1
dog911	0	1	13	1	55	50	1	1	0	2	2	4	4	1	3	1	2	1	2	2	4	0	1	1	3	2	2	1	1	3	1	3	3	3	3	3	3	2	4	3	3	3	3	4	2	5	1	3	5
dog912	1	2	48	2	45	25	1	2	0	5	1	1	1	1	0	0	2	4	2	1	4	1	4	1	3	3	3	2	2	3	0	2	4	2	2	1	5	1	3	3	5	2	4	5	1	3	3	2	5
dog913	1	1	33	1	37	27	1	1	0	5	3	4	4	0	0	0	1	4	1	0	2	0	2	1	2	1	2	1	1	4	0	2	4	3	1	1	5	3	1	3	4	1	5	2	4	4	2	3	1
dog915	0	2	96	4	17	12	1	2	1	5	3	3	4	1	1	0	2	1	2	1	4	1	1	2	3	4	4	1	1	3	0	2	4	1	1	1	5	5	5	1	4	1	5	2	4	4	2	1	4
dog916	0	2	37	2	56	32	2	2	0	3	3	1	4	0	4	0	2	1	2	1	4	1	2	2	3	4	3	2	3	4	0	5	1	1	1	1	5	5	2	1	3	2	4	1	5	4	2	2	2
dog917	1	1	90	3	32	4	2	1	0	5	1	4	1	0	0	0	2	1	1	2	4	1	2	2	2	1	2	1	2	3	0	2	4	2	1	1	5	1		1	3	1	5	2	4	3	3	1	1
dog918	1	2	131	5	46	20	2	2	0	2	3	3	1	0	0	0	1	4	2	0	2	0	3	2	3	3	4	1	1	2	1	2	4	1	1	1	5	2	1	1	3	1	5	1	5	1	5	1	5
dog919	0	1	118	4	55	30	2	1	0	3	3	4	1	1	3	1	2	1	3	0	4	0	4	3	2	4	2	2	2	2	0	3	3	1	2	1	5	4	3	1	5	1	5	2	4	3	3	2	2
dog920	1	1	62	2	50	60	1	1	0	5	2	4	1	0	0	0	2	3	3	0	2	0	2	3	2	1	2	1	1	2	1	3	3	1	1	1	5	5	1	1	1	4	2	2	4	5	1	3	3
dog921	1	1	46	2	35	13	1	2	0	3	2	3	2	1	0	0	2	4	3	1	2	0	4	1	2	1	3	2	1	3	0	3	3	3	4	5	1	3	4	3	5	3	3	1	5	3	3	3	3
dog922	0	1	25	1	30	10	1	2	0	1	3	4	2	1	3	0	2	4	1	1	2	0	4	1	3	1	3	1	1	3	0	2	4	1	4	4	2	2	5	1	4	3	3	2	4	1	5	1	2
dog923	1	1	52	2	44	14	1	2	0	3	3	5	2	1	0	0	2	2	1	0	2	0	4	1	3	4	3	2	3	3	0	3	3	2	2	1	5	5	5	2	5	2	4	1	5	4	2	4	2
dog924	0	1	47	2	30	6	2	1	0	1	1	2	2	0	1	0	2	4	2	0	2	0	3	3	3	4	3	2	2	3	0	4	2	4	1	1	5	3	1	1	1	1	5	5	1	3	3	4	1
dog925	0	1	194	6	40	16	2	1	1	3	1	4	4	0	2	1	2	2	1	1	3	0	2	2	2	2	2	1	1	4	0	3	3	1	2	3	3	3	3	1		4	2	1	5	2	4	1	4
dog926	0	1	58	2	43	25	1	2	1	3	3	1	2	1	4	0	2	1	1	2	3	0	4	1	3	4	4	2	2	2	0	2	4	2	3	1	5	5	5	1	5	4	2	1	5	1	5	2	1
dog927	0	1	123	5	40	45	2	1	0	4	2	3	1	0	1	0	2	4	3	1	3	1	2	2	2	2	1	2	1	2	0	3	3	3	1	3	3	4	3	3	3	3	3	1	5	3	3	3	3
dog928	0	2	136	5	54	19	2	2	0	3	3	1	4	1	1	1	2	3	2	1	3	1	2	2	3	4	3	3	3	2	0	5	1	1	2	1	5	4	2	2	3	1	5	1	5	4	2	4	2
dog929	0	1	208	6	50	35	1	2	1	5	2	3	4	0	3	0	2	1	1	0	3	0	3	1	3	1	2	1	1	1	1	3	3	1	1	1	5	2	1	1	3	2	4	3	3	5	1	2	3
dog931	1	1	253	6	70	32	2	2	0	4	1	3	4	1	0	0	2	4	1	1	4	1	2	2	1	4	3	2	3	1	0	3	3	2	4	1	5	5	5	1	5	1	5	1	5	5	1	4	1
dog932	0	2	265	6	65	32	2	2	0	4	1	3	4	1	4	0	2	4	2	1	4	1	1	2	1	4	3	2	3	1	0	5	1	1	2	1	5	5	2	1	1	1	5	1	5	4	2	1	1
dog933	0	1	100	4	45	30	1	1	0	4	3	3	2	0	4	0	2	1	2	0	4	0	3	3	2	2	1	1	2	2	0	3	3	1	2	1	5	2	3	2	4	3	3	5	1	3	3	1	2
dog934	1	2	16	1	15	2	2	1	0	1	3	2	4	0	0	0	2	1	2	2	2	0	1	2	3	1	4	1	1	3	1	4	2	3	2	1	5	3	1	5	3	1	5	5	1	5	1	5	2
dog935	0	1	123	5	30	7	2	1	0	5	1	3	3	0	1	0	2	4	2	0	2	0	2	2	3	4	3	2	3	2	0	4	2	1	1	1	5	5	1	1	4	1	5	1	5	5	1	5	2
dog936	1	1	61	2	30	17	1	2	0	5	3	3	3	1	0	0	2	2	2	2	2	0	2	1	2	4	3	2	3	3	0	4	2	1	1	1	5	4	1	3	2	2	4	1	5	4	2	3	3
dog937	0	2	106	4	60	35	1	2	0	5	2	3	1	0	1	0	2	2	2	2	2	0	2	1	1	2	4	1	1	2	1	3	3	5	2	4	2	1	1	1	5	1	5	2	4	5	1	5	1
dog938	0	2	33	1	30	8	1	1	0	2	3	4	3	1	3	0	2	1	1	2	4	1	1	3	3	4	2	1	3	3	1	5	1	1	2	1	5	5	5		3	4	2	1	5	5	1	4	1
dog939	0	1	141	5	38	13	2	1	0	5	3	3	2	0	1	0	2	2	2	1	4	0	3	3	2	4	3	2	2	2	0	3	3	2	2	1	5	2	3	2	3	3	3	4	2	4	2	2	4
dog940	1	1	84	3	35	8	2	1	0	1	2	2	3	0	0	0	2	4	3	1	2	0	2	3	3	3	3	2	2	4	0	5	1	3	1	1	5	3	5	1	1	3	3	1	5	1	5	2	1
dog941	0	2	160	6	50	28	1	2	1	1	2	4	4	1	2	0	2	1	2	2	2	0	4	1	3	4	3	1	2	2	0	5	1	1	1	2	4	4	1	1	1	5	1	1	5	2	4	1	3
dog942	0	2	138	5	58	26	1	2	0	3	3	3	4	1	2	0	2	2	2	0	3	0	3	1	3	4	3	2	2	4	0	5	1	1	1	1	5	5	3	1	4	2	4	3	3	4	2	3	3
dog943	0	2	143	5	55	29	2	2	1	4	3	3	3	0	3	0	2	3	2	0	4	1	2	3	3	4	3	2	1	2	0	5	1	1	1	1	5	5	2	1	3	3	3	1	5	3	3	1	1
dog944	1	1	13	1	30	10	2	1	0	5	3	2	3	0	0	0	2	2	3	1	2	0	2	3	3	2	3	1	2	4	0	5	1	1	1	1	5	3	1	1	5	1	5	2	4	5	1	3	1
dog946	1	2	38	2	48	11	1	2	0	4	3	3	3	1	0	0	2	1	3	0	3	0	3	3	3	4	3	2	2	3	0	3	3	1	1	1	5	4	1	1	4	2	4	1	5	4	2	2	2
dog947	0	1	163	6	35	20	2	1	1	5	3	4	1	0	3	0	2	2	3	1	2	0	2	3	2	2	2	1	1	3	0	2	4	1	1	1	5	1	1	1	1	1	5	5	1	3	3	1	3
dog949	0	1	40	2	60	40	1	1	0	5	1	4	2	1	1	0	2	3	2	1	4	1	3	1	2	4	2	2	3	3	0	3	3	1	1	1	5	4	1	3	2	2	4	2	4	5	1	4	2
dog950	1	1	38	2	76	50	2	1	0	2	3	1	2	0	0	0	2	3	2	2	4	1	1	2	1	2	2	2	1	2	1	1	5	3	1	1	5	5	1	3	1	1	5	1	5	3	3	3	3
dog951	0	1	52	2	40	24	2	2	0	1	3	4	2	1	3	0	2	2	2	0	2	0	4	1	3	2	3	1	2	4	1	2	4	5	2	1	5	3	1	1	3	5	1	2	4	5	1	5	1
dog952	1	1	38	2	40	35	1	1	0	5	2	2	2	0	0	0	2	2	2	1	3	1	2	3	2	1	2	1	2	4	0	2	4	1	1	1	5	2	1	1	5	1	5	2	4	3	3	1	1
dog953	0	1	111	4	50	31	2	1	0	3	1	1	4	1	3	0	2	1	3	1	4	0	3	2	3	3	3	2	1	1	1	2	4	5	4	5	1	5	2	2	3	2	4	1	5	3	3	5	1
dog954	1	1	47	2	20	15	2	1	0	5	3	4	2	0	0	0	2	3	2	0	4	1	2	2	2	1	2	1	2	3	0	1	5	1	1	1	5	1	1	2	5	1	5	5	1	5	1	4	1
dog955	0	2	39	2	60	38	2	2	0	5	1	1	4	0	3	0	2	2	2	2	2	0	2	2	2	3	4	1	2	1	0	5	1	4	3	1	5	5	2	5	2	3	3	1	5	2	4	1	2
dog956	0	1	136	5	43	18	2	1	0	5	3	3	3	0	2	0	2	2	2	2	3	1	2	3	2	4	2	1	1	4	0	5	1	1	1	1	5	3	1	1	1	3	3	1	5	5	1	1	1
dog957	0	1	190	6	50	29	1	1	0	5	1	3	2	1	4	0	2	3	1	0	4	1	1	3	2	4	4	2	3	2	0	3	3	1	2	1	5	5	5	1	2	1	5	1	5	3	3	1	1
dog958	0	1	126	5	65	38	2	1	0	3	3	4	2	0	1	0	2	3	2	0	3	0	2	2	3	2	2	1	2	2	1	4	2	2	1	1	5	4	2	1	4	1	5	4	2	3	3	1	5
dog960	0	2	97	4	40	18	1	1	0	2	3	3	4	0	1	0	2	2	2	2	2	0	3	1	2	4	3	1	2	3	0	5	1	1	1	1	5	4	2	2	4	1	5	4	2	4	2	3	4
dog962	1	1	73	3	74	25	1	2	0	4	3	4	1	0	0	0	2	1	3	1	3	1	1	3	2	1	3	1	2	3	1	4	2	2	2	1	5	1	1	1	5	2	4	3	3	4	2	4	2
dog963	0	1	122	5	68	31	2	1	0	2	3	4	4	1	2	0	2	3	2	1	1	0	3	3	3	2	3	1	2	3	1	3	3	4	2	1	5	2	2	1	5	2	4	2	4	4	2	5	1
dog964	0	2	75	3	45	9	2	2	0	2	3	3	3	1	2	0	2	2	3	0	2	0	4	1	3	4	2	2	2	1	0	3	3	1	1	1	5	3	3	2	1	3	3	1	5	3	3	1	2
dog967	0	1	20	1	40	9	1	2	0	4	3	1	4	0	3	0	2	1	2	0	2	0	3	1	3	4	4	2	2	3	1	4	2	4	2	1	5	3	3	2	5	4	2	2	4	5	1	4	1
dog968	0	1	135	5	35	10	1	1	0	1	3	3	3	1	4	0	2	2	2	1	1	0	1	1	3	4	3	2	1	3	0	3	3	3	2	1	5	5	3	1	1	5	1	1	5	3	3	5	4
dog969	0	1	137	5	30	5	2	1	1	1	3	3	1	0	1	0	2	3	2	0	3	1	2	3	3	1	2	2	1	3	0	1	5	4	4	1	5	1	2	2	1	1	5	1	5	3	3	4	1
dog970	0	1	115	4	60	40	1	1	0	5	2	1	3	0	4	1	2	4	2	1	3	0	2	3	2	4	2	2	1	3	0	4	2	4	3	3	3	3	1	1	5	3	3	2	4	2	4	3	2
dog971	0	1	173	6	45	20	2	2	0	4	2	2	2	1	1	0	2	1	2	2	3	0	3	1	2	4	2	1	3	2	0	3	3	1	2	2	4	3	3	1	3	4	2	4	2	3	3	1	3
dog973	0	1	198	6	30	14	1	2	1	2	2	3	4	1	2	1	2	2	3	1	1	0	4	1	3	1	3	1	1	4	1	5	1	3	1	4	2	5	1	2	1	4	2	1	5	4	2	3	3
dog974	1	1	100	4	50	20	1	2	0	2	3	2	1	1	0	0	2	3	2	1	4	1	4	1	2	3	2	1	3	1	0	3	3	1	2	1	5	3	3	1	5	2	4	4	2	3	3	1	1
dog975	0	2	120	5	25	4	2	1	0	3	3	2	2	1	1	0	2	2	1	0	4	0	2	3	3	4	3	1	2	4	0	1	5	1	2	1	5	2	2	1	2	2	4	1	5	1	5	1	2
dog976	0	1	66	2	58	37	2	2	0	3	2	2	3	1	3	0	2	1	2	0	2	0	2	2	3	4	2	2	2	3	0	2	4	1	2	1	5	5	1	1	1	1	5	1	5	5	1	4	2
dog977	0	2	112	4	23	6	2	2	1	4	3	1	3	1	1	0	2	1	2	1	3	0	2	3	2	3	1	1	1	3	1	1	5	2	1	1	5	5	3	1	4	4	2	2	4	2	4	4	1
dog978	1	1	12	1	70	30	2	2	0	5	3	1	4	0	0	0	2	3	1	1	4	1	1	2	3	4	4	1	2	3	0	5	1	1	1	1	5	5	1	1	1	1	5	1	5	5	1	5	1
dog979	0	2	112	4	45	45	2	1	0	1	2	1	4	1	3	0	2	3	2	0	2	0	2	2	2	2	1	1	1	4	0	5	1	4	5	1	5	3	5	1	3	1	5	1	5	5	1	5	1
dog980	1	1	96	4	27	10	1	1	0	3	3	4	4	1	0	0	2	4	2	1	3	1	4	1	2	2	2	2	1	3	0	1	5	1	4	1	5	3	4	5	5	3	3	5	1	5	1	1	3
dog981	0	2	86	3	70	40	2	1	0	5	2	5	3	0	3	0	2	1	2	2	2	0	1	2	1	4	2	2	3	3	0	4	2	2	1	3	3	5	1	1	4	3	3	1	5	3	3	4	3
dog982	0	2	136	5	45	30	2	1	1	3	3	5	3	1	2	1	2	2	3	2	2	0	2	2	2	4	1	1	2	4	1	2	4	5	5	4	2	1	1	1	5	5	1	5	1	5	1	5	1
dog983	1	1	132	5	50	35	1	2	0	4	2	5	3	1	0	0	2	3	1	2	4	1	3	1	2	3	2	2	1	1	0	3	3	1	1	1	5	1	4	1	1	5	1	1	5	1	5	1	5
dog984	1	2	104	4	53	28	2	2	0	5	3	1	1	1	0	0	2	4	2	1	1	0	3	1	3	4	3	1	3	2	0	5	1	1	3	1	5	5	2	1	1	5	1	1	5	3	3	1	4
dog985	1	1	73	3	60	30	2	1	0	3	1	3	2	0	0	0	2	4	2	0	1	0	2	2	3	4	4	2	1	2	0	3	3	2	2	1	5	4	2	2	3	3	3	2	4	4	2	3	2
dog986	1	2	26	1	50	33	2	1	0	5	3	1	2	1	0	0	2	4	2	0	2	0	1	2	2	3	3	1	2	3	0	3	3	1	1	1	5	4	4	1	2	1	5	4	2	4	2	3	3
dog988	0	2	53	2	35	32	2	2	0	3	2	1	1	0	4	0	2	1	3	0	2	0	1	2	3	3	3	1	2	3	0	4	2	1	1	1	5	5	1	1	2	1	5	1	5	4	2	1	1
dog989	0	1	161	6	60	30	2	2	1	5	1	5	1	1	1	0	2	3	2	2	4	1	3	2	2	2	1	1	1	3	1	2	4	1		1	5	1	1	1	1	4	2	4	2	3	3	1	1
dog990	0	2	74	3	70	35	2	2	0	5	3	4	3	1	3	0	2	3	3	0	3	1	1	3	2	4	1	2	1	3	0	1	5	3	2	2	4	1	3	4	4	3	3	5	1	3	3	3	3
dog991	1	2	88	3	54	30	2	1	0	2	2	4	2	0	0	0	2	3	2	2	3	1	2	2	1	1	2	3	1	2	0	1	5	1	2	3	3	1	4	1	1	5	1	1	5	2	4	3	3
dog992	0	1	104	4	15	2	2	2	0	1	1	2	1	1	1	0	2	3	2	0	2	0	4	2	3	2	3	1	2	4	0	2	4	2	3	3	3	4	4	2	2	4	2	3	3	2	4	2	4
dog993	1	2	76	3	50	38	2	1	0	5	3	2	3	0	0	0	2	3	2	0	4	1	2	2	2	4	2	2	2	1	0	5	1	2	3	1	5	5	3	1	3	1	5	1	5	3	3	3	3
dog994	1	1	37	2	45	18	1	1	0	5	3	2	1	0	0	0	2	4	2	0	1	0	1	3	1	1	2	1	1	4	0	1	5	1	4	1	5	1	5	1	5	5	1	3	3	5	1	1	5
dog995	1	2	39	2	30	7	2	2	0	3	3	5	1	1	0	0	2	1	1	0	2	0	2	2	3	4	3	3	2	3	0	2	4	1	1	1	5	5	3	2	4	1	5	1	5	4	2	2	1
dog996	0	2	160	6	40	18	2	1	0	5	2	3	4	0	3	1	2	2	2	2	2	0	2	2	3	2	3	2	1	3	1	2	4	1	5	5	1	2	1	1	1	4	2	1	5	5	1	5	1
dog997	0	2	122	5	45	28	2	2	0	3	3	3	2	1	1	0	2	3	3	0	1	0	4	1	3	4	3	2	2	2	0	5	1	1	1	1	5	5	4	1	3	3	3	1	5	3	3	1	1
dog998	0	1	180	6	46	27	2	1	1	4	3	4	2	1	4	0	2	3	1	1	3	1	4	1	2	4	2	2	2	1	0	5	1	1	1	1	5	5	1	1	1	3	3	2	4	3	3	1	1
dog999	0	1	96	4	30	32	2	2	0	3	2	3	3	0	2	1	2	4	2	2	3	1	2	3	1	2	2	1	1	3	1	2	4	1	2	1	5	3	1	1	2	2	4	1	5	2	4	1	1
dog1000	0	1	132	5	75	30	1	1	1	4	3	5	1	1	1	0	2	1	2	2	4	1	1	3	2	3	1	1	1	2	0	2	4	4	3	4	2	3	2	5	4	4	2	4	2	4	2	5	5
dog1002	0	1	138	5	62	35	2	2	1	1	3	1	2	1	2	0	2	3	2	2	3	1	4	1	2	1	2	1	1	2	0	5	1	1	2	2	4	2	1	1	3	5	1	1	5	5	1	2	1
dog1003	1	2	71	2	60	22	2	1	0	3	1	3	2	0	0	0	2	3	1	1	2	0	1	2	3	1	2	1	1	1	0	3	3	1	1	1	5	5	3	1	5	1	5	1	5	5	1	1	3
dog1004	0	1	168	6	23	10	2	1	0	3	3	3	4	1	2	1	2	4	2	1	3	1	2	2	3	2	4	2	2	3	0	2	4	4	4	2	4	1	4	4	5	3	3	3	3	4	2	4	2
dog1005	1	2	30	1	56	26	2	2	0	2	1	1	2	1	0	0	2	3	2	2	3	1	4	1	3	1	2	1	1	2	0	2	4	1	3	1	5	1	5	1	2	5	1	1	5	1	5	1	3
dog1006	1	2	50	2	63	22	2	2	0	5	3	4	1	1	0	0	2	3	2	1	1	0	2	2	1	3	3	2	2	3	0	2	4	1	3	1	5	2	3	1	4	1	5	1	5	3	3	2	1
dog1008	1	1	120	5	45	15	1	2	0	5	3	4	1	1	0	0	2	1	1	0	3	0	4	1	2	4	3	2	3	3	0	5	1	1	2	2	4	4	4	1	4	2	4	1	5	3	3	1	3
dog1010	1	2	106	4	47	28	2	1	0	4	3	1	1	0	0	0	2	3	3	2	2	0	1	2	2	4	1	3	2	2	0	4	2	2	2	1	5	5	1	3	3	1	5	1	5	5	1	5	1
dog1011	1	2	82	3	42	14	2	1	0	4	3	4	1	1	0	0	2	3	2	1	3	0	3	3	2	4	3	2	2	1	0	3	3	1	4	1	5	5	2	1	4	4	2	1	5	2	4	2	2
dog1012	0	1	192	6	38	11	2	1	1	2	2	4	2	1	2	0	2	1	3	0	3	0	1	2	2	1	2	1	1	3	1	2	4	5	1	1	5	1	2	2	5	4	2	2	4	2	4	1	4
dog1013	0	1	116	4	55	35	2	2	0	3	3	1	4	1	3	1	2	2	2	1	1	0	4	3	3	4	4	2	2	2	0	4	2	1	1	1	5	4	1	1	1	4	2	1	5	4	2	1	3
dog1014	0	2	125	5	60	30	1	2	0	2	2	1	1	0	1	0	2	4	2	1	2	0	1	3	3	3	2	2	1	1	1	5	1	3	3	4	2	3	1	2	5	5	1	3	3	3	3	4	4
dog1015	0	1	190	6	30	35	1	1	0	3	3	3	4	0	2	0	2	4	2	1	2	0	3	1	2	3	3	1	1	3	1	3	3	1	3	3	3	5	2	5	3	3	3	1	5	3	3	4	2
dog1016	0	2	43	2	55	22	1	1	1	5	3	4	2	1	4	0	1	3	2	0	3	1	3	1	3	2	3	1	2	3	0	5	1	5	1	1	5	3	1	1	5	3	3	1	5	5	1	5	1
dog1017	0	2	115	4	63	31	2	1	0	4	3	3	2	0	1	0	2	1	1	2	4	0	2	2	2	4	2	3	2	3	0	5	1	4	3	1	5	5	1	1	2	1	5	1	5	5	1	5	3
dog1018	0	2	105	4	50	30	2	2	0	2	3	3	4	1	4	1	2	3	2	0	1	0	3	3	3	4	3	3	1	1	1	5	1	3	2	3	3	5	5	1	5	4	2	1	5	3	3	5	3
dog1019	0	1	100	4	65	40	2	1	1	5	3	1	1	1	3	0	1	4	2	0	2	0	2	2	2	2	3	2	1	2	0	5	1	1	1	1	5	5	1	1	3	3	3	5	1	5	1	5	3
dog1021	0	2	72	3	30	10	1	1	0	4	3	4	2	0	4	1	2	3	1	2	2	1	2	3	2	2	3	1	1	3	0	2	4	3	4	3	3	4	3	4	3	4	2	4	2	4	2	3	4
dog1023	0	1	46	2	55	20	2	2	0	3	3	1	1	1	3	0	2	1	1	1	3	0	2	2	3	4	3	3	2	3	0	4	2	3	1	1	5	4	3	1	1	1	5	2	4	3	3	1	4
dog1024	1	1	72	3	50	25	1	2	0	2	2	3	4	1	0	0	2	1	3	2	2	0	3	3	3	4	2	2	3	3	1	5	1	3	3	2	4	4	2	1	2	4	2	1	5	3	3	3	3
dog1025	0	1	117	4	27	11	2	1	0	1	3	1	4	0	3	1	2	3	2	1	2	0	1	2	3	1	4	1	1	2	0	2	4	5	3	1	5	1	3	1	1	4	2	1	5	5	1	5	1
dog1026	0	2	132	5	43	30	1	2	0	5	2	1	1	1	4	0	2	1	2	0	4	0	4	1	2	1	3	1	1	3	1	2	4	3	4	3	3	4	5	2	2	4	2	1	5	1	5	3	4
dog1027	0	1	89	3	28	6	2	2	0	3	3	2	2	1	2	0	2	2	2	1	2	0	2	2	3	4	3	1	2	2	0	2	4	1	1	1	5	3	3	1	1	2	4	1	5	2	4	2	1
dog1028	1	1	45	2	30	23	2	1	0	4	3	5	4	1	0	0	2	1	1	0	2	0	2	2	2	4	2	2	2	3	1	3	3	1	2	1	5	4	2	1	5	4	2	2	4	5	1	4	3
dog1029	0	1	60	2	53	30	1	2	0	3	3	3	1	1	4	0	2	1	3	0	4	0	3	1	2	3	3	2	3	2	0	3	3	4	5	2	4	4	3	3	5	4	2	3	3	5	1	5	5
dog1031	0	2	85	3	54	25	2	2	0	3	1	1	2	0	4	0	2	3	2	0	4	1	1	2	1	4	3	3	3	1	0	3	3	3	1	1	5	4	2	1	1	2	4	1	5	2	4	1	2
dog1032	0	2	26	1	35	8	2	1	0	1	2	3	4	1	3	1	2	1	2	1	2	0	2	2	3	3	3	2	2	3	0	4	2	1	1	1	5	4	3	1	1	3	3	1	5	3	3	1	3
dog1033	1	2	21	1	50	25	2	1	0	4	3	5	2	0	0	0	2	1	1	2	4	0	2	2	2	4	3	2	2	3	0	4	2	2	1	1	5	5	1	1	3	2	4	1	5	4	2	2	1
dog1034	0	2	70	2	56	38	2	2	0	4	2	4	2	1	4	0	2	1	1	1	3	0	1	3	2	4	2	2	2	4	1	2	4	2	3	1	5	4	5	4	5	2	4	1	5	2	4	2	5
dog1035	1	1	62	2	35	15	1	2	0	4	3	5	2	0	0	0	2	4	2	2	1	0	3	3	1	4	4	3	1	3	0	3	3	2	5	1	5	5	2	4	5	2	4	1	5	4	2	5	4
dog1036	1	2	50	2	40	27	2	2	0	2	3	5	1	0	0	0	2	3	2	0	2	0	1	2	3	4	2	2	3	2	0	2	4	1	1	1	5	3	1	1	3	1	5	2	4	5	1	1	1
dog1037	0	1	132	5	40	20	1	1	0	2	3	3	2	0	1	0	2	1	2	1	3	0	2	3	3	2	4	1	1	2	1	4	2	3	2	1	5	2	2	1	1	3	3	1	5	4	2	4	3
dog1038	0	2	157	6	30	7	2	1	1	2	2	1	4	0	2	1	2	2	3	1	2	0	1	2	3	1	4	2	2	3	1	5	1	2	2	4	2	3	1	1	2	5	1	1	5	5	1	4	1
dog1039	0	2	151	6	50	23	1	2	0	4	2	3	2	1	2	1	2	1	3	0	3	0	1	1	3	4	1	2	2	3	0	3	3	1	4	2	4	4	5	1	1	2	4	1	5	3	3	2	4
dog1040	1	2	75	3	35	18	2	2	0	2	3	3	2	0	0	0	2	1	2	0	4	0	2	3	3	4	3	2	2	2	0	1	5	1	1	1	5	1	1	1	4	3	3	1	5	5	1	3	4
dog1041	1	1	60	2	40	28	1	2	0	5	3	4	2	1	0	0	2	2	2	0	3	0	2	3	2	3	2	1	3	3	0	4	2	2	1	1	5	2	1	3	5	4	2	2	4	4	2	3	3
dog1042	0	2	42	2	40	7	1	2	0	3	3	3	3	1	3	1	2	3	2	0	4	1	4	1	3	2	3	1	2	3	0	1	5	3	1	1	5	3	1	1	5	3	3	3	3	5	1	3	3
dog1045	0	1	154	6	40	33	2	1	0	3	3	3	4	1	3	0	2	2	2	1	3	1	1	3	3	4	4	2	2	2	1	3	3	1	1	1	5	5	3	1	3	1	5	1	5	5	1	3	1
dog1046	0	1	20	1	60	31	2	1	0	4	3	4	4	0	4	0	2	1	1	0	4	0	1	2	1	4	4	3	3	2	0	3	3	4	2	2	4	4	2	4	4	2	4	2	4	4	2	4	3
dog1047	0	2	143	5	30	8	1	1	1	1	3	4	4	1	1	1	2	1	1	0	3	0	2	1	3	2	3	1	2	4	0	3	3	3	5	1	5	3	5	3	4	5	1	3	3	1	5	3	4
dog1049	1	1	25	1	35	6	2	1	0	1	1	1	2	0	0	0	2	2	2	1	1	0	2	2	3	4	2	2	2	3	0	1	5	1	1	1	5	4	1	1	4	1	5	1	5	5	1	2	1
dog1050	1	2	135	5	58	30	2	2	0	3	3	1	4	0	0	0	2	2	1	2	4	1	2	2	3	2	3	2	2	3	0	4	2	1	1	1	5	3	1	1	3	2	4	2	4	2	4	3	2
dog1051	1	1	12	1	50	20	2	1	0	1	3	1	3	0	0	0	1	1	3	1	3	1	1	2	2	1	2	1	2	3	0	5	1	2	2	1	5	3	3	1	5	3	3	3	3	2	4	2	3
dog1052	0	2	109	4	50	25	2	2	1	4	2	1	3	1	3	0	2	4	1	2	1	0	3	1	3	4	1	3	1	2	1	5	1	4	1	1	5	5	1	1	1	2	4	5	1	5	1	5	1
dog1053	0	1	105	4	37	22	2	1	1	3	2	3	3	1	4	0	2	2	1	2	3	1	3	3	2	4	3	2	1	3	1	1	5	2	1	1	5	2	1	1	2	1	5	1	5	2	4	2	1
dog1054	1	2	33	1	80	35	1	2	0	5	1	4	3	0	0	0	2	3	2	1	4	1	1	1	3	4	2	1	3	4	0	3	3	2	1	1	5	4	4	1	5	1	5	2	4	2	4	1	1
dog1055	0	2	159	6	30	28	2	1	1	3	3	2	2	0	4	0	2	4	2	0	2	0	1	2	2	4	2	1	2	1	0	2	4	1	3	1	5	4	3	1	2	3	3	1	5	2	4	2	1
dog1056	0	1	157	6	15	3	2	1	0	1	3	2	2	0	1	0	1	3	3	1	2	0	4	3	3	3	2	1	2	3	0	4	2	1	1	1	5	4	3	1	1	2	4	1	5	3	3	1	3
dog1057	0	2	138	5	40	11	1	2	0	3	3	1	1	1	3	0	1	2	2	0	4	1	3	1	3	4	2	2	2	2	0	2	4	2	1	1	5	4	2	1	5	1	5	2	4	4	2	4	1
dog1058	1	2	84	3	40	30	2	2	0	3	2	1	1	0	0	0	2	2	1	0	2	0	2	2	3	4	2	1	3	3	0	4	2	1	1	2	4	5	3	1	1	3	3	1	5	2	4	1	1
dog1059	1	1	48	2	25	5	2	2	0	2	3	5	2	0	0	0	2	2	2	1	2	1	2	2	3	2	3	1	3	2	0	5	1	1	1	1	5	3	1	1	1	3	3	1	5	3	3	1	1
dog1060	1	2	20	1	50	25	1	2	0	5	3	2	4	0	0	0	2	3	3	0	3	1	2	3	2	4	3	1	2	3	0	3	3	2	2	1	5	5	2	2	5	1	5	3	3	2	4	3	1
dog1061	1	2	24	1	56	45	2	1	0	3	2	3	2	0	0	0	2	3	2	1	3	1	1	2	2	1	3	1	1	1	0	4	2	1	1	1	5	1	4	1	5	5	1	3	3	4	2	3	1
dog1062	1	1	88	3	70	65	2	1	0	5	2	3	4	0	0	0	2	2	2	0	2	0	1	2	2	1	3	1	1	3	0	4	2	3	2	2	4	4	2	3	2	3	3	2	4	4	2	4	3
dog1064	1	1	83	3	67	40	2	2	0	5	2	5	1	1	0	0	2	4	2	2	3	0	3	3	2	3	3	2	3	3	0	4	2	3	3	1	5	5	5	1	3	3	3	1	5	1	5	1	3
dog1065	1	1	12	1	23	6	2	2	0	3	3	1	4	0	0	0	2	2	2	0	2	0	2	2	3	4	3	1	2	3	0	3	3	1	1	1	5	4	2	1	5	2	4	1	5	5	1	4	2
dog1066	0	1	61	2	40	8	1	1	0	3	3	3	2	0	3	0	2	3	2	1	3	1	1	3	3	4	3	1	2	4	0	1	5	2	3	1	5	5	2	1	1	4	2	2	4	4	2	5	2
dog1067	0	1	167	6	42	35	1	1	1	3	3	2	3	0	2	0	2	4	2	1	2	0	3	1	2	4	3	2	2	3	0	1	5	1	1	2	4	4	1	1	1	3	3	2	4	5	1	5	1
dog1068	1	2	29	1	30	10	2	1	0	2	3	2	1	0	0	0	2	1	2	1	3	0	2	2	3	4	3	1	3	2	0	2	4	1	4	1	5	4	1	1	2	1	5	1	5	3	3	1	4
dog1069	0	2	135	5	33	25	1	2	0	3	2	2	3	1	1	0	2	4	2	1	2	0	2	1	2	2	3	2	1	3	0	2	4	2	5	1	5	5	2	3	5	2	4	3	3	3	3	2	3
dog1070	0	1	123	5	25	20	1	2	0	3	3	4	3	1	2	0	1	3	2	0	2	0	1	3	3	2	1	1	1	4	1	4	2	3	3	1	5	3	4	2	5	1	5	5	1	2	4	2	2
dog1072	0	1	146	6	30	17	1	2	0	2	2	4	2	1	1	1	2	2	2	0	3	1	2	2	3	4	3	1	2	3	0	2	4	4	2	2	4	4	1	3	5	3	3	2	4	4	2	5	1
dog1073	0	1	107	4	48	26	2	2	0	3	3	1	2	0	3	0	2	2	1	1	2	0	3	1	3	4	3	2	2	4	0	5	1	1	1	1	5	4	1	1	3	1	5	1	5	5	1	1	5
dog1076	0	1	154	6	30	35	2	1	1	2	1	4	2	0	4	1	2	3	1	2	3	1	2	2	2	3	3	2	1	1	1	3	3	1	1	3	3	4	3	1	2	4	2	2	4	3	3	1	4
dog1077	0	2	35	1	45	25	1	1	0	4	3	4	1	1	1	0	2	1	3	0	4	0	1	1	2	3	2	1	2	2	0	3	3	2	2	1	5	1	4	1	2	1	5	3	3	3	3	2	2
dog1078	0	1	149	6	50	40	2	1	1	3	3	5	3	0	3	0	1	3	2	1	3	1	4	2	2	2	2	2	1	1	1	4	2	2	1	1	5	2	1	1	4	1	5	1	5	5	1	4	2
dog1079	0	2	20	1	60	34	2	2	0	5	3	4	1	0	2	0	2	4	2	1	2	1	2	3	2	3	2	2	1	1	0	5	1	5	2	1	5	5	1	1	3	1	5	1	5	5	1	5	1
dog1080	0	2	86	3	35	15	2	2	0	3	3	1	3	0	3	0	2	1	2	1	3	0	3	2	2	4	1	2	2	3	0	1	5	4	2	1	5	4	2	1	3	1	5	2	4	5	1	5	2
dog1081	1	2	51	2	20	3	2	1	0	2	2	3	3	1	0	0	2	4	2	2	4	1	4	1	2	2	2	1	1	1	0	1	5	1	1	1	5	5	1	5	1	1	5	5	1	5	1	1	1
dog1082	1	2	72	3	56	28	2	1	0	5	3	1	2	0	0	0	2	1	1	2	2	0	1	2	3	4	4	3	2	3	1	5	1	2	1	1	5	5	1	1	1	1	5	1	5	5	1	2	4
dog1083	0	2	178	6	25	5	1	1	1	1	3	2	2	1	1	0	2	1	2	2	4	0	4	3	1	2	3	1	1	3	0	5	1	3	3	1	5	1	1	1	1	4	2	1	5	4	2	1	3
dog1084	1	2	114	4	55	27	2	1	0	2	3	4	3	0	0	0	2	4	1	0	2	0	1	3	3	2	3	1	2	3	0	5	1	1	1	1	5	4	1	1	4	1	5	1	5	5	1	5	1
dog1085	1	1	179	6	30	10	1	1	0	5	2	4	2	0	0	0	2	1	2	1	3	0	2	1	1	3	4	1	2	3	0	5	1	2	1	1	5	5	1	2	4	5	1	5	1	4	2	2	3
dog1086	0	1	156	6	48	18	1	1	1	5	3	2	4	1	2	0	2	2	3	1	2	0	1	1	2	1	3	1	1	3	1	4	2	1	2	4	2	2	4	1	4	5	1	2	4	2	4	2	4
dog1087	0	1	109	4	41	11	2	1	1	2	3	2	2	0	4	0	2	4	2	1	2	1	2	2	3	1	4	1	2	4	0	5	1	2	2	4	2	3	3	5	4	2	4	2	4	3	3	3	3
dog1088	0	2	128	5	25	2	2	1	0	3	1	4	2	0	1	0	2	2	2	2	4	1	1	3	3	4	3	2	2	4	0	1	5	5	2	1	5	5	2	5	3	2	4	1	5	4	2	3	5
dog1089	1	2	99	4	20	8	1	2	0	3	3	4	1	1	0	0	2	4	2	1	2	0	3	1	3	4	2	2	2	4	1	2	4	3	3	1	5	2	5	1	4	3	3	1	5	3	3	5	2
dog1090	0	2	109	4	30	10	1	1	0	5	2	3	1	0	1	0	2	3	2	1	4	1	3	3	2	1	3	1	1	2	0	2	4	2	2	1	5	2	2	2	4	4	2	3	3	4	2	4	1
dog1091	0	1	173	6	28	8	2	1	0	1	2	1	1	0	4	0	2	1	2	1	4	0	4	3	3	2	2	1	1	3	0	5	1	4	3	4	2	3	1	1	4	4	2	1	5	5	1	5	4
dog1092	0	1	122	5	20	6	2	2	0	2	3	5	1	0	1	0	2	2	1	2	2	0	1	1	3	1	3	2	1	4	0	5	1	1	1	1	5	5	1	1	3	3	3	3	3	5	1	1	1
dog1093	1	2	85	3	52	48	2	1	0	3	2	4	1	1	0	0	2	3	1	0	1	0	1	3	3	4	3	2	2	3	1	5	1	1	2	3	3	4	3	1	3	2	4	2	4	3	3	2	2
dog1095	0	1	136	5	70	50	2	1	1	5	2	4	2	0	3	0	2	3	3	1	2	1	3	1	2	3	1	2	1	3	0	4	2	1	1	4	2	3	2	1	1	4	2	5	1	4	2	4	2
dog1096	0	2	29	1	65	45	2	1	1	5	3	4	2	0	4	0	2	2	1	2	4	1	2	3	1	3	2	2	2	4	0	3	3	1	1	1	5	4	1	1	4	2	4	3	3	5	1	5	1
dog1097	0	1	91	3	50	32	2	2	0	3	2	4	4	1	4	0	2	4	2	0	3	1	3	3	3	4	3	2	3	3	1	5	1	1	1	1	5	5	3	5	3	1	5	1	5	3	3	2	2
dog1098	1	1	84	3	50	22	2	2	0	5	3	4	1	0	0	0	2	3	2	1	4	1	2	2	2	3	2	1	2	3	0	3	3	5	3	1	5	2	1	1	5	5	1	5	1	3	3	4	1
dog1099	0	1	139	5	20	4	2	1	0	1	3	1	2	0	1	0	2	2	1	0	2	0	2	3	3	4	3	2	2	2	0	3	3	1	1	1	5	4	2	1	1	2	4	1	5	4	2	1	2
dog1100	0	1	206	6	27	7	1	1	1	3	3	3	4	0	2	1	2	4	1	0	2	0	2	3	1	3	3	2	1	1	0	4	2	2	2	2	4	3	4	3	1	3	3	2	4	3	3	2	2
dog1101	1	2	22	1	60	50	2	1	0	5	3	4	2	0	0	0	2	1	1	1	3	0	2	3	2	4	3	1	2	3	0	2	4	1	1	1	5	4	2	1	3	3	3	2	4	3	3	1	1
dog1102	0	1	132	5	30	14	2	1	0	3	2	3	3	1	3	0	2	4	1	1	2	0	2	3	3	3	3	3	1	2	0			4	4	2	4	5	1	3	5	4	2	1	5	5	1	5	1
dog1103	0	2	159	6	37	20	2	2	1	5	2	3	2	0	1	0	2	1	1	2	4	0	4	1	2	1	4	1	1	3	1	5	1	1	1	2	4	2	1	1	5	5	1	2	4	4	2	1	1
dog1104	1	2	107	4	60	15	1	1	0	2	3	5	1	0	0	0	2	1	2	0	4	0	1	2	2	3	1	2	2	4	0	3	3	2	2	2	4	3	4	2	3	4	2	3	3	3	3	2	2
dog1105	1	2	36	2	27	7	2	2	0	3	3	2	1	1	0	0	2	1	2	1	4	0	2	2	3	1	3	1	1	2	1	2	4	3	4	1	5	1	2	4	3	3	3	4	2	3	3	4	2
dog1106	1	1	87	3	63	34	2	1	0	2	3	3	3	0	0	0	2	1	3	1	4	0	1	2	1	4	3	2	2	1	0	5	1	1	1	1	5	5	1	1	4	1	5	5	1	5	1	5	1
dog1108	0	2	147	6	28	6	2	2	0	3	3	4	2	0	1	0	2	3	2	2	4	1	2	2	2	3	2	2	1	3	0	5	1	3	3	1	5	5	3	1	2	2	4	3	3	3	3	1	1
dog1109	0	2	99	4	45	22	2	2	0	2	2	3	2	0	2	0	2	1	1	2	4	0	1	2	3	4	2	2	1	1	0	5	1	1	1	1	5	5	1	1	3	1	5	1	5	3	3	1	2
dog1111	1	1	63	2	47	37	2	2	0	5	3	1	1	0	0	0	2	4	2	0	1	0	1	2	2	3	4	1	2	1	0	5	1	1	1	1	5	5	1	1	1	5	1	1	5	5	1	4	1
dog1112	0	1	68	2	55	13	2	2	0	3	3	3	2	0	1	1	2	1	2	0	4	1	2	2	2	4	3	3	2	3	0	5	1	3	2	1	5	5	3	2	4	3	3	4	2	5	1	1	3
dog1113	1	1	121	5	20	10	2	1	0	4	3	4	2	1	0	0	2	1	2	1	2	0	2	2	1	4	3	2	1	3	0	2	4	2	2	2	4	4	2	2	5	1	5	1	5	5	1	5	2
dog1114	1	2	144	6	40	15	1	1	0	2	3	1	2	1	0	0	2	2	1	1	2	0	3	1	3	4	2	2	3	3	0	4	2	2	1	1	5	5	3	1	1	1	5	1	5	3	3	3	5
dog1116	0	2	133	5	28	9	2	1	0	2	3	2	2	1	3	0	2	1	3	1	4	0	1	2	3	4	3	1	2	3	1	2	4	2	1	1	5	4	2	3	4	2	4	1	5	3	3	2	3
dog1117	1	2	88	3	52	36	2	1	0	5	3	5	2	1	0	0	2	4	2	1	2	0	1	3	1	3	2	3	1	3	1	5	1	3	1	2	4	5	1	2	2	2	4	1	5	4	2	4	1
dog1118	0	1	126	5	30	8	2	2	1	3	3	1	3	1	2	0	2	2	1	1	1	0	4	1	3	3	3	2	3	4	0	5	1	1	3	3	3	3	1	1	2	2	4	1	5	3	3	2	4
dog1119	0	1	102	4	50	4	2	2	0	1	3	2	2	1	2	0	2	3	2	0	3	0	2	3	3	4	2	2	1	3	1	1	5	1	3	2	4	3	4	1	4	2	4	5	1	4	2	3	1
dog1120	0	2	86	3	30	7	2	2	0	3	2	4	1	0	3	0	2	3	3	1	3	1	2	2	3	3	3	2	2	3	0	1	5	1	1	1	5	2	2	1	4	4	2	1	5	1	5	1	2
dog1121	1	2	72	3	40	12	1	1	0	1	3	2	1	0	0	0	2	4	2	0	3	0	1	1	3	2	2	1	1	2	0	2	4	1	1	1	5	2	2	1	4	2	4	2	4	2	4	3	4
dog1122	0	1	84	3	55	35	2	1	0	5	3	1	2	0	3	0	2	2	3	0	2	0	4	3	2	2	3	1	2	4	0	2	4	3	1	1	5	1	1	1	4	2	4	3	3	5	1	5	1
dog1123	0	2	135	5	25	10	1	2	1	1	2	2	4	1	3	1	2	1	2	0	2	0	1	2	3	4	3	2	2	3	1	3	3	3	4	1	5	3	3	4	4	1	5	1	5	3	3	3	4
dog1124	0	2	38	2	45	22	1	2	0	3	1	1	2	1	3	0	2	2	1	1	1	0	4	1	3	4	3	2	3	4	0	3	3	1	2	1	5	4	3	1	4	2	4	1	5	3	3	1	1
dog1125	1	1	98	4	65	45	2	1	0	5	3	4	2	0	0	0	1	1	2	2	2	0	2	3	2	3	2	1	1	3	0	2	4	4	2	1	5	2	1	4	1	3	3	4	2	5	1	5	1
dog1126	1	1	53	2	45	14	1	2	0	3	3	5	4	1	0	0	2	3	3	0	1	0	1	3	2	4	3	3	3	4	0	1	5	1	3	1	5	4	4	1	5	1	5	1	5	2	4	2	2
dog1127	0	2	122	5	45	25	1	2	0	5	3	4	2	1	3	1	2	1	3	0	4	0	2	1	3	4	2	1	2	1	0	5	1	5	1	1	5	3	2	1	5	2	4	3	3	4	2	5	1
dog1128	0	2	33	1	60	26	2	1	0	5	1	4	3	0	4	0	2	2	1	2	2	0	3	2	3	4	2	2	3	4	0	5	1	1	4	1	5	5	2	1	5	2	4	1	5	4	2	1	4
dog1129	0	1	73	3	50	21	2	1	0	4	3	3	4	1	4	0	2	2	1	1	2	0	2	3	3	3	4	2	2	2	0	2	4	2	3	1	5	3	3	1	5	1	5	2	4	3	3	2	2
dog1130	1	2	66	2	40	8	2	2	0	1	3	4	2	1	0	0	2	3	2	0	2	0	3	1	3	4	3	2	3	3	0	4	2	5	2	1	5	4	4	1	2	1	5	1	5	4	2	5	3
dog1131	0	2	48	2	14	4	2	1	0	1	1	4	3	0	3	1	2	1	2	1	4	1	2	3	3	4	3	1	1	4	1	1	5	3	3	2	4	5	3	4	1	3	3	1	5	5	1	4	2
dog1132	0	2	121	5	40	30	2	2	1	5	2	4	1	0	3	0	2	4	2	1	2	0	1	3	2	2	2	1	1	3	1	5	1	3	1	1	5	5	1	2	2	5	1	1	5	3	3	3	1
dog1133	0	1	23	1	52	45	2	1	0	4	1	4	1	0	3	0	2	1	3	1	4	0	2	2	3	4	2	1	3	1	0	2	4	2	1	1	5	3	1	2	5	1	5	3	3	4	2	1	1
dog1134	0	2	47	2	55	17	1	1	0	3	2	3	1	0	4	0	2	3	2	1	3	1	2	3	3	4	3	2	3	2	0	2	4	4	2	1	5	4	2	2	3	2	4	1	5	4	2	5	1
dog1135	0	2	149	6	45	20	1	2	1	1	1	3	2	1	2	1	2	3	2	0	1	0	4	1	3	1	3	1	1	4	0	3	3	1	4	4	2	1	5	1	3	5	1	2	4	2	4	1	5
dog1136	0	2	97	4	40	32	2	2	0	5	3	4	1	0	4	1	2	1	3	1	4	0	2	2	3	3	2	1	2	3	0	4	2	5	1	3	3	3	1	1	3	4	2	1	5	4	2	5	1
dog1137	1	2	24	1	55	35	2	2	0	4	3	3	3	0	0	0	2	4	3	1	2	0	2	2	1	4	3	1	2	3	0	3	3	1	1	1	5	3	2	2	4	2	4	4	2	5	1	4	2
dog1139	1	2	16	1	35	6	2	2	0	3	1	1	2	0	0	0	2	1	2	0	2	0	2	2	3	4	3	2	2	3	0	2	4	1	3	1	5	3	5	1	5	1	5	5	1	5	1	1	2
dog1140	0	2	98	4	44	13	2	1	1	2	3	4	2	1	4	0	2	1	3	2	3	0	1	3	3	4	3	1	3	3	0	2	4	2	3	1	5	5	2	2	3	2	4	1	5	3	3	2	2
dog1141	1	2	51	2	35	12	2	2	0	3	1	4	4	0	0	0	2	1	2	2	2	0	2	2	3	2	3	1	2	1	0	1	5	3	4	1	5	2	3	1	5	3	3	4	2	2	4	3	1
dog1143	1	2	22	1	23	8	1	2	0	4	3	1	3	0	0	0	2	1	2	1	2	0	2	1	3	4	4	3	3	1	0	1	5	1	5	1	5	5	1	1	4	1	5	1	5	4	2	2	2
dog1144	0	2	31	1	24	3	2	1	0	2	1	4	1	0	1	0	2	3	2	0	4	1	2	2	3	3	3	1	1	3	0	3	3	4	1	1	5	4	1	5	5	3	3	5	1	4	2	3	5
dog1145	1	2	42	2	25	8	2	2	0	4	3	3	3	0	0	0	2	4	2	1	2	0	1	2	1	4	3	2	1	2	0	5	1	1	1	1	5	5	5	1	5	3	3	1	5	3	3	1	5
dog1146	1	2	55	2	15	2	2	1	0	2	3	4	2	0	0	0	2	1	2	2	3	0	3	3	3	2	3	1	3	3	0	4	2	1	2	1	5	2	4	1	3	3	3	1	5	1	5	1	4
dog1147	1	2	133	5	60	35	1	2	0	5	3	4	3	0	0	0	2	1	2	0	3	0	2	3	2	3	2	1	3	4	0	2	4	3	2	1	5	3	1	5	5	1	5	5	1	4	2	3	1
dog1148	0	1	190	6	15	5	2	1	1	1	3	3	2	1	1	0	2	1	2	0	3	0	4	1	3	1	4	1	1	2	0	2	4	3	1	1	5	1	3	3	1	2	4	1	5	3	3	3	2
dog1150	0	2	123	5	55	25	2	2	0	1	3	3	3	1	3	0	1	1	3	1	4	1	3	2	2	4	2	3	1	3	1	2	4	1	2	1	5	3	1	1	4	2	4	2	4	3	3	2	1
dog1151	0	1	96	4	30	10	2	2	0	3	3	3	4	1	3	0	2	4	2	2	2	0	4	1	3	4	3	2	1	2	0	2	4	3	2	1	5	2	2	2	4	3	3	4	2	4	2	3	1
dog1153	1	2	23	1	40	23	1	1	0	5	1	3	2	1	0	0	2	4	1	2	1	0	2	3	3	4	3	2	2	2	0	3	3	1	5	1	5	5	5	5	5	1	5	5	1	1	5	4	1
dog1155	0	2	108	4	30	11	2	2	0	3	2	3	4	1	3	0	2	4	2	2	2	0	4	1	3	4	2	2	1	2	0	4	2	1	2	1	5	4	2	1	2	3	3	3	3	3	3	1	2
dog1156	1	1	30	1	60	30	2	1	0	4	1	3	4	0	0	0	2	2	2	1	4	0	2	2	2	2	3	2	2	1	0	5	1	1	1	1	5	5	1	1	2	1	5	1	5	4	2	1	1
dog1157	1	2	85	3	35	13	1	1	0	5	2	5	1	1	0	0	2	1	3	0	4	0	2	2	2	4	3	2	2	1	1	3	3	1	3	1	5	5	5	1	5	1	5	1	5	1	5	1	5
dog1158	1	2	27	1	40	5	1	2	0	4	3	4	2	0	0	0	2	1	2	1	4	0	1	2	2	3	2	1	2	3	0	2	4	1	1	1	5	3	3	2	2	3	3	4	2	4	2	1	2
dog1159	0	1	188	6	45	35	2	1	1	1	3	4	2	1	4	0	2	3	2	0	2	0	2	3	3	3	4	1	1	3	0	5	1	1	1	1	5	1	5	1	5	3	3	2	4	3	3	1	4
dog1160	1	1	17	1	40	20	2	1	0	5	3	1	1	0	0	1	2	4	2	1	2	0	2	2	2	3	3	2	2	2	0	3	3	3	2	1	5	1	2	1	1	1	5	4	2	4	2	4	1
dog1161	0	2	130	5	60	30	2	1	0	2	3	4	2	0	3	0	2	1	2	1	2	0	3	3	2	4	2	2	2	4	1	2	4	3	3	2	4	4	2	3	4	2	4	2	4	3	3	4	2
dog1162	1	2	61	2	33	13	2	2	0	4	1	5	1	1	0	0	2	3	2	1	2	0	2	2	3	3	4	1	2	4	0	2	4	1	1	1	5	1	1	1	3	2	4	5	1	4	2	2	1
dog1164	1	2	54	2	25	9	1	2	0	5	2	4	1	1	0	1	2	4	2	0	2	0	4	1	3	4	3	2	3	2	0	5	1	1	1	1	5	5	2	1	1	1	5	1	5	5	1	1	1
dog1165	1	2	55	2	55	32	2	1	0	3	3	3	2	0	0	0	2	3	2	1	2	0	2	3	1	4	2	2	2	3	0	3	3	2	1	2	4	2	1	1	2	3	3	3	3	3	3	3	2
dog1166	1	1	51	2	62	2	1	2	0	2	3	3	2	1	0	0	2	4	3	0	1	0	1	1	3	4	4	2	2	1	1	5	1	1	1	1	5	4	3	1	1	1	5	1	5	3	3	1	5
dog1167	0	1	172	6	50	25	1	1	1	4	3	3	3	1	2	0	2	4	2	0	3	0	3	3	1	3	3	1	1	3	0	3	3	3	3	2	4	5	3	3	3	3	3	2	4	2	4	3	3
dog1168	0	1	108	4	30	24	1	1	0	2	3	4	1	1	1	0	2	3	3	0	4	1	4	1	1	4	2	1	2	3	0	4	2	5	2	2	4	5	2	3	2	2	4	1	5	3	3	4	2
dog1169	0	1	133	5	45	13	1	1	0	3	2	2	2	0	4	0	2	2	3	1	2	0	2	3	3	4	3	1	2	2	0	2	4	2	2	1	5	2	3	2	3	2	4	1	5	3	3	4	2
dog1170	0	1	111	4	61	30	1	2	0	5	3	3	1	1	1	0	2	4	2	2	3	0	2	1	1	3	3	3	1	3	0	5	1	3	2	1	5	2	5	2	2	1	5	3	3	4	2	4	1
dog1172	1	1	114	4	55	36	1	2	0	2	2	4	1	1	0	0	2	4	3	1	4	1	4	3	2	4	2	2	2	3	0	5	1	3	2	4	2	4	3	1	4	4	2	3	3	3	3	2	4
dog1173	0	1	96	4	25	8	1	2	0	2	3	2	1	1	1	0	2	3	2	2	2	0	4	1	3	1	2	1	1	3	1	3	3	1	3	3	3	5	3	1	1	1	5	2	4	2	4	2	1
dog1174	1	1	30	1	68	35	2	1	0	4	3	3	3	1	0	1	2	1	1	2	3	0	2	1	3	4	3	2	2	2	0	1	5	4	3	1	5	5	4	3	5	1	5	4	2	3	3	3	5
dog1175	1	1	47	2	30	9	1	2	0	2	3	4	1	1	0	0	2	3	3	0	3	1	2	3	3	3	3	2	1	3	0	2	4	1	2	1	5	5	5	4	1	1	5	1	5	1	5	1	5
dog1176	0	1	159	6	55	18	1	1	1	4	3	4	1	0	4	0	2	4	2	0	3	0	2	3	2	1	1	1	1	2	1	3	3	4	2	4	2	2	2	4	4	5	1	2	4	3	3	4	2
dog1177	0	2	132	5	45	20	1	2	0	1	2	2	2	0	2	0	2	4	2	1	2	0	1	3	3	4	4	2	2	3	0	5	1	1	1	1	5	5	2	1	5	4	2	1	5	4	2	1	1
dog1179	0	2	193	6	50	23	1	2	1	4	3	3	4	0	3	1	2	4	2	0	2	0	4	1	3	3	3	2	1	3	1	2	4	1	1	1	5	5	1	1	1	1	5	1	5	3	3	1	1
dog1180	1	1	63	2	43	11	1	2	0	3	3	1	1	0	0	0	2	1	3	1	2	0	2	3	3	4	3	2	3	3	0	5	1	1	1	1	5	5	3	1	5	2	4	1	5	1	5	1	3
dog1181	1	1	93	3	75	60	2	1	0	5	2	2	1	0	0	0	2	4	2	1	3	0	2	2	2	3	2	2	2	1	0	3	3	1	1	1	5	5	1	1	1	1	5	1	5	5	1	3	1
dog1182	0	1	147	6	40	44	2	1	0	3	3	4	1	0	3	0	2	4	2	0	3	1	2	3	2	3	2	2	2	4	0	5	1	3	5	3	3	4	2	1	1	2	4	1	5	4	2	3	1
dog1183	0	1	162	6	53	30	2	1	1	1	1	1	1	0	3	0	1	2	2	1	4	1	3	3	3	2	1	1	1	3	1	4	2	3	1	4	2	2	1	2	1	1	5	1	5	5	1	5	1
dog1184	0	1	156	6	40	21	2	1	0	5	3	3	3	0	3	0	1	4	2	0	2	0	2	2	2	4	2	2	1	1	0	3	3	3	2	2	4	2	1	2	3	2	4	1	5	3	3	3	2
dog1185	0	2	107	4	53	30	2	2	0	3	1	3	4	0	3	0	2	2	3	0	1	0	2	2	3	4	3	2	2	4	0	5	1	1	1	1	5	5	1	1	4	3	3	1	5	5	1	4	1
dog1186	1	2	98	4	50	30	2	1	0	5	2	4	1	0	0	0	2	1	2	0	4	0	2	2	2	1	2	1	2	3	0	4	2	3	2	3	3	1	1	1	1	5	1	1	5	4	2	3	2
dog1187	0	1	137	5	30	12	1	1	0	5	3	5	2	1	4	0	2	4	2	0	4	0	2	3	2	1	2	1	1	2	1	3	3	2	3	2	4	2	2	2	4	2	4	3	3	4	2	2	3
dog1188	1	1	147	6	40	16	1	1	0	5	3	4	2	0	0	0	2	1	1	0	2	0	2	3	2	4	3	3	2	2	0	3	3	1	2	1	5	5	3	4	3	1	5	1	5	3	3	1	3
dog1189	0	2	141	5	25	9	1	1	1	5	1	3	1	1	3	1	2	1	2	1	3	0	2	1	2	2	3	1	2	2	0	3	3	3	2	2	4	4	3	2	1	5	1	5	1	2	4	1	2
dog1190	1	1	49	2	25	8	2	2	0	1	3	2	1	1	0	0	2	2	2	0	3	1	1	2	3	1	3	1	2	2	0	4	2	2	1	3	3	1	3	1	4	3	3	3	3	3	3	4	1
dog1192	0	2	62	2	37	13	2	1	1	4	3	3	3	1	4	1	2	3	2	2	2	0	3	2	1	4	3	2	2	2	1	5	1	5	1	4	2	5	5	3	2	3	3	1	5	5	1	5	1
dog1195	0	1	102	4	30	3	2	2	0	1	1	3	2	1	1	0	2	1	2	1	3	0	4	3	3	4	2	1	2	1	0	1	5	1	3	1	5	5	5	1	3	1	5	1	5	3	3	1	4
dog1197	0	2	150	6	30	11	1	2	0	1	1	3	4	1	4	0	2	4	3	0	1	0	1	3	3	1	3	1	1	1	0	2	4	3	3	1	5	2	2	2	5	2	4	4	2	4	2	4	2
dog1198	0	2	171	6	55	33	2	2	1	4	2	3	4	1	2	1	2	1	3	0	3	0	2	2	1	4	2	2	1	3	1	5	1	3	2	4	2	3	1	1	3	5	1	4	2	4	2	4	1
dog1199	1	2	150	6	50	33	1	2	0	3	1	2	2	0	0	0	2	2	3	2	1	0	4	1	3	4	3	2	2	3	0	4	2	1	1	1	5	2	1	1	1	2	4	1	5	5	1	3	3
dog1200	0	1	87	3	50	32	2	1	1	5	3	4	2	0	4	0	2	3	2	1	4	1	3	3	2	3	2	1	2	4	0	4	2	1	1	1	5	1	4	1	2	1	5	2	4	2	4	3	1
dog1201	0	1	73	3	55	8	2	1	0	5	3	3	1	1	1	0	2	1	2	0	2	0	2	2	2	3	2	2	1	2	1	3	3	4	2	2	4	2	1	3	4	1	5	2	4	4	2	3	2
dog1203	0	2	90	3	40	37	1	1	1	5	2	1	2	1	4	0	2	2	2	1	3	0	4	1	2	1	1	2	1	3	0	4	2	2	1	1	5	3	2	1	5	1	5	2	4	5	1	2	2
dog1204	0	2	97	4	55	25	1	1	0	3	2	2	2	1	4	1	2	2	2	0	2	1	2	3	3	4	3	2	2	2	1	3	3	1	1	1	5	5	5	1	1	5	1	1	5	3	3	5	5
dog1205	0	2	115	4	27	5	2	1	0	2	3	3	2	0	1	0	2	4	2	2	3	1	1	3	1	2	2	1	1	1	0	3	3	3	1	1	5	3	5	1	1	3	3	1	5	5	1	5	1
dog1206	0	1	147	6	62	38	2	1	1	3	3	1	4	0	4	0	2	2	1	2	2	0	2	2	1	4	3	2	2	2	0	4	2	1	1	1	5	3	1	1	3	2	4	1	5	5	1	1	1
dog1207	0	2	168	6	40	21	1	2	0	3	3	3	2	1	2	0	2	4	2	0	2	1	1	1	3	2	2	1	2	4	0	2	4	5	5	1	5	4	3	1	5	2	4	1	5	3	3	3	3
dog1208	0	2	91	3	56	25	2	2	0	3	1	5	4	1	3	1	2	1	2	2	2	0	3	1	3	4	2	1	2	3	1	1	5	1	4	1	5	4	5	1	1	2	4	1	5	2	4	3	1
dog1209	0	1	115	4	33	7	2	1	1	4	2	4	3	1	3	0	2	4	2	1	2	0	2	3	3	4	3	2	1	3	1	4	2	3	3	1	5	5	3	3	1	3	3	1	5	4	2	2	3
dog1210	1	2	72	3	45	18	2	1	0	5	3	4	1	1	0	0	2	1	2	0	4	1	4	3	2	3	2	1	1	3	0	3	3	1	1	1	5	5	2	1	3	2	4	1	5	5	1	3	3
dog1211	1	1	14	1	60	28	2	1	0	5	1	4	2	0	0	0	1	3	1	2	4	1	2	2	1	4	3	3	3	3	0	4	2	1	1	1	5	5	4	1	5	1	5	1	5	3	3	1	1
dog1213	0	2	70	2	50	24	1	2	0	1	3	5	1	1	3	0	2	1	2	1	2	0	4	1	3	3	4	2	3	2	0	3	3	4	1	1	5	3	1	3	3	1	5	1	5	4	2	5	3
dog1214	0	1	72	3	55	25	2	2	0	4	3	4	4	0	3	1	2	3	2	0	2	0	2	1	2	1	2	1	1	4	0	3	3	2	2	1	5	5	2	2	3	3	3	1	5	4	2	2	3
dog1216	0	2	18	1	50	30	2	2	0	2	3	2	1	1	3	0	2	3	2	0	3	1	2	2	1	1	3	1	1	3	0	2	4	3	1	1	5	3	4	3	5	4	2	3	3	3	3	4	1
dog1217	1	1	74	3	17	7	2	1	0	3	3	3	2	1	0	0	2	4	2	1	1	0	2	2	1	4	3	2	2	2	0	4	2	1	2	1	5	2	1	1	3	5	1	5	1	4	2	3	4
dog1218	0	1	108	4	25	7	1	2	0	4	3	3	2	1	3	0	2	3	3	2	4	0	4	1	1	4	3	1	1	4	1	5	1	1	1	1	5	1	1	1	1	3	3	3	3	4	2	3	1
dog1220	0	2	92	3	50	15	2	1	0	3	3	3	3	1	2	0	2	2	3	1	2	0	2	2	3	4	3	2	2	3	0	5	1	4	3	1	5	5	3	1	5	3	3	4	2	4	2	5	4
dog1221	1	2	103	4	40	13	1	2	0	3	3	2	1	0	0	0	2	4	1	2	4	1	2	1	1	4	2	2	2	2	0	4	2	3	3	1	5	5	3	1	5	1	5	1	5	4	2	4	5
dog1222	0	1	101	4	30	10	2	1	0	3	3	1	2	1	3	0	1	3	3	1	3	1	3	3	3	4	3	1	2	3	0	1	5	3	2	1	5	4	3	2	2	3	3	2	4	3	3	3	3
dog1223	0	2	146	6	35	15	2	2	1	1	3	3	4	0	1	1	2	4	1	2	3	0	2	2	1	2	3	1	1	1	0	3	3	1	3	5	1	2	1	1	1	1	5	3	3	3	3	1	1
dog1224	0	1	69	2	30	10	1	2	0	1	3	4	3	1	1	0	2	1	2	0	2	0	4	1	3	4	3	2	3	3	1	3	3	3	1	1	5	5	3	1	4	1	5	1	5	4	2	5	1
dog1225	1	2	48	2	50	21	2	2	0	3	3	5	1	0	0	0	2	3	2	1	3	1	1	2	3	4	3	2	3	3	0	4	2	1	1	1	5	5	3	1	4	1	5	2	4	3	3	1	3
dog1226	1	1	115	4	32	31	2	1	0	4	3	1	1	1	0	0	2	2	3	1	4	1	1	2	1	1	3	1	2	1	0	3	3	1	3	1	5	4	3	2	4	2	4	3	3	3	3	3	3
dog1227	0	1	65	2	55	45	1	2	1	2	2	4	4	0	3	0	2	3	2	0	4	0	1	1	3	4	2	3	3	1	0	4	2	2	4	1	5	5	2	3	4	2	4	1	5	4	2	3	1
dog1228	1	2	92	3	20	6	2	1	0	1	3	3	3	0	0	0	2	4	2	1	1	0	2	3	3	4	3	2	1	2	0	4	2	5	1	1	5	2	3	1	3	2	4	2	4	3	3	2	1
dog1229	1	1	117	4	55	55	2	2	0	5	2	3	3	0	0	0	2	4	2	1	3	0	1	3	2	3	3	2	3	3	0	4	2	2	1	1	5	4	1	2	5	2	4	1	5	4	2	4	2
dog1230	0	2	62	2	20	4	2	2	0	2	3	3	3	1	2	1	2	2	3	1	3	1	4	1	3	4	2	2	2	3	0	3	3	3	1	1	5	5	2	2	2	2	4	2	4	5	1	5	1
dog1231	0	2	145	6	25	23	2	2	0	2	1	3	4	0	2	0	2	3	2	0	2	0	1	3	2	3	2	2	1	2	0	5	1	1	3	2	4	1	5	1	1	1	5	1	5	3	3	1	4
dog1232	0	2	19	1	25	5	1	2	0	2	3	3	4	1	4	0	2	1	2	1	2	0	3	1	3	2	3	1	2	3	1	2	4	1	5	1	5	5	5	1	5	3	3	1	5	2	4	1	1
dog1233	1	1	113	4	25	9	2	1	0	3	3	4	1	1	0	0	2	2	1	0	3	0	2	2	1	4	3	3	2	3	1	4	2	5	3	1	5	5	1	5	3	3	3	1	5	4	2	5	3
dog1234	0	2	14	1	56	30	2	1	0	5	3	3	2	0	4	0	2	2	2	1	2	0	2	3	2	4	3	2	2	4	0	1	5	2	1	1	5	4	1	1	4	1	5	3	3	4	2	2	1
dog1235	0	1	93	3	45	10	2	1	0	4	3	4	4	0	1	0	2	1	3	0	4	0	3	2	2	4	3	2	2	3	0	4	2	1	2	1	5	3	5	2	1	4	2	1	5	4	2	1	3
dog1236	1	2	73	3	60	28	2	2	0	3	1	5	2	1	0	0	2	1	2	0	1	0	4	1	3	4	3	2	3	3	1	5	1	3	1	1	5	4	4	1	5	5	1	1	5	2	4	2	4
dog1237	1	2	26	1	65	27	2	2	0	3	3	1	3	0	0	0	1	4	2	1	2	0	2	2	3	4	2	2	2	1	0	1	5	1	1	1	5	2	3	1	4	3	3	3	3	3	3	2	3
dog1238	0	1	97	4	25	12	1	1	0	2	3	3	2	1	1	0	2	4	2	0	2	0	2	1	2	1	1	1	1	1	0	1	5	5	1	3	3	1	4	5	5	4	2	2	4	4	2	5	2
dog1239	1	1	17	1	60	23	1	2	0	4	1	1	3	1	0	0	1	4	2	1	2	0	3	3	3	4	3	1	2	1	1	1	5	1	1	1	5	4	1	1	5	4	2	5	1	5	1	3	1
dog1240	1	2	30	1	45	20	2	2	0	1	1	3	1	1	0	0	2	1	2	1	2	0	2	2	3	4	2	2	2	2	0	1	5	1	2	1	5	3	5	2	5	2	4	2	4	3	3	2	3
dog1241	0	1	110	4	70	70	2	2	0	5	3	5	1	0	4	0	2	3	2	2	3	1	1	3	2	3	2	1	1	1	0	5	1	1	1	1	5	4	1	1	2	2	4	3	3	5	1	5	3
dog1244	0	1	111	4	30	8	2	2	0	1	3	3	4	0	3	1	2	3	3	1	3	1	2	2	3	4	3	1	1	2	0	4	2	4	3	5	1	5	3	1	5	3	3	1	5	3	3	4	3
dog1245	1	2	42	2	35	6	1	1	0	1	3	1	1	1	0	0	2	2	2	0	2	0	3	1	3	2	3	1	2	3	0	1	5	3	1	1	5	5	5	4	5	3	3	1	5	2	4	2	3
dog1246	0	1	156	6	50	35	1	1	1	4	2	4	2	0	3	1	2	1	3	0	4	0	2	3	2	2	2	1	1	2	1	4	2	1	1	3	3	4	4	1	5	4	2	3	3	3	3	1	2
dog1247	0	2	110	4	50	32	1	2	0	3	2	3	2	0	1	0	1	4	2	0	1	0	4	1	3	4	3	2	2	4	0	5	1	1	1	1	5	5	1	2	5	4	2	1	5	4	2	3	2
dog1248	1	1	60	2	40	20	1	2	0	5	2	4	2	1	0	0	2	1	2	1	4	0	2	3	3	4	3	2	2	3	0	3	3	1	2	3	3	5	1	2	4	3	3	2	4	4	2	2	2
dog1250	0	2	81	3	25	3	2	1	0	1	3	2	4	0	3	1	2	2	2	0	2	0	2	3	3	4	3	1	1	3	0	4	2	1	1	1	5	3	4	1	2	1	5	4	2	2	4	1	4
dog1251	0	1	106	4	30	24	2	1	0	4	1	1	2	0	2	1	2	2	2	2	4	0	1	1	1	4	3	3	2	3	0	5	1	1	1	1	5	5	1	1	2	1	5	1	5	4	2	2	1
dog1252	0	1	110	4	35	25	2	1	0	4	3	4	3	1	3	1	1	2	1	1	3	0	2	2	3	3	3	1	1	3	0	4	2	1	1	3	3	1	1	1	1	4	2	5	1	5	1	1	1
dog1253	1	2	29	1	50	25	2	2	0	5	3	2	4	0	0	0	1	2	1	0	4	0	2	2	2	4	3	2	3	2	0	3	3	1	1	1	5	5	1	1	3	3	3	1	5	4	2	1	1
dog1254	0	1	113	4	30	8	2	1	0	3	2	4	2	0	2	0	2	1	2	1	3	0	2	3	3	4	1	2	2	3	1	5	1	1	1	1	5	2	1	1	1	4	2	2	4	5	1	1	3
dog1255	0	2	19	1	38	6	2	2	0	4	1	2	4	0	3	0	2	2	2	2	2	0	2	2	3	4	3	3	2	1	0	5	1	1	1	1	5	5	2	1	4	1	5	1	5	5	1	1	3
dog1256	0	2	85	3	60	33	2	2	0	3	2	1	1	0	3	0	2	4	2	1	2	0	3	3	2	4	3	2	1	1	0	3	3	3	1	1	5	5	3	1	5	3	3	3	3	3	3	4	4
dog1257	1	2	18	1	50	50	2	1	0	5	3	5	3	1	0	0	2	4	2	0	2	0	4	1	2	2	3	1	2	4	0	5	1	5	1	1	5	5	1	1	1	3	3	2	4	5	1	5	5
dog1258	0	2	112	4	45	32	1	1	0	4	2	5	4	1	3	0	2	4	2	1	4	1	1	1	2	4	3	3	2	1	0	5	1	3	1	1	5	5	2	1	4	1	5	1	5	5	1	5	3
dog1259	1	2	25	1	60	25	2	1	0	5	3	2	2	0	0	0	2	4	2	1	2	0	3	2	2	4	2	2	2	1	0	3	3	3	2	1	5	5	1	2	4	1	5	3	3	4	2	3	3
dog1260	0	1	51	2	25	4	2	2	0	5	2	3	1	0	3	1	2	4	2	1	4	1	3	3	3	2	2	2	2	2	0	3	3	1	3	1	5	5	1	1	2	1	5	5	1	4	2	3	1
dog1262	1	2	144	6	40	12	2	2	0	5	3	1	1	0	0	0	2	2	2	0	2	0	2	3	1	3	1	2	2	3	1	3	3	1	2	2	4	4	3	1	5	4	2	4	2	3	3	3	1
dog1263	1	1	60	2	55	38	2	1	0	3	3	2	2	0	0	0	2	3	2	0	4	0	2	2	2	3	3	1	2	3	0	5	1	1	2	1	5	2	1	1	2	2	4	1	5	3	3	1	1
dog1264	1	2	68	2	45	30	1	2	0	5	3	4	3	1	0	0	2	2	2	1	2	0	3	1	2	3	3	2	2	4	0	4	2	1	1	1	5	3	2	1	4	5	1	1	5	4	2	2	1
dog1265	0	1	105	4	60	32	2	1	1	3	3	3	2	1	4	0	1	2	2	1	4	0	2	3	3	4	2	1	1	1	0	2	4	1	1	1	5	5	2	2	1	1	5	2	4	4	2	4	1
dog1266	0	2	130	5	50	45	2	1	0	1	3	3	4	0	4	0	2	4	2	2	4	0	2	2	3	4	2	3	1	1	1	5	1	3	3	1	5	5	1	1	3	3	3	1	5	3	3	2	2
dog1267	1	1	121	5	40	45	1	2	0	4	3	2	1	1	0	0	2	3	3	0	4	1	4	1	2	1	1	2	2	3	0	5	1	2	1	1	5	1	2	2	2	3	3	3	3	4	2	4	2
dog1268	0	2	104	4	53	23	2	2	0	2	3	3	2	1	3	0	2	2	3	1	1	0	2	2	3	2	3	2	2	3	1	3	3	4	4	2	4	2	2	2	5	2	4	5	1	3	3	5	1
dog1269	1	1	40	2	53	40	1	2	0	5	3	4	3	1	0	0	2	2	2	1	2	0	3	1	2	4	3	1	3	4	0	4	2	3	2	1	5	4	1	2	4	1	5	1	5	4	2	4	1
dog1270	1	1	198	6	80	42	2	2	0	5	3	3	3	0	0	0	2	3	1	2	2	1	3	1	1	2	3	1	1	3	0	1	5	2	2	1	5	3	1	3	2	2	4	1	5	5	1	3	3
dog1272	1	2	108	4	25	10	2	2	0	3	3	3	4	1	0	0	2	4	2	1	2	0	1	2	3	3	3	2	1	1	0	3	3	2	2	1	5	4	3	1	5	2	4	2	4	3	3	3	4
dog1274	1	1	74	3	60	38	2	2	0	4	2	3	1	1	0	0	2	3	2	1	3	0	4	1	3	4	4	1	2	1	0	2	4	3	2	1	5	3	1	2	5	4	2	2	4	5	1	5	1
dog1275	0	2	93	3	40	32	2	1	0	5	2	3	3	1	4	0	2	2	1	2	3	1	1	3	2	4	1	3	1	3	0	5	1	1	1	5	1	5	1	1	5	5	1	1	5	2	4	1	2
dog1276	1	2	83	3	35	32	2	1	0	5	3	3	4	0	0	0	2	4	2	0	2	0	1	2	2	4	3	2	2	3	0	5	1	1	1	1	5	5	1	1	5	3	3	5	1	5	1	1	5
dog1277	1	2	14	1	52	24	2	1	0	4	3	4	1	0	0	0	1	3	1	2	3	1	2	2	3	4	3	2	3	3	0	5	1	2	2	1	5	5	1	1	5	1	5	1	5	5	1	5	3
dog1278	1	2	71	2	37	10	2	2	0	5	3	3	3	1	0	0	2	4	2	1	2	0	4	1	2	2	4	2	1	3	0	5	1	1	1	1	5	5	3	1	3	3	3	1	5	5	1	3	3
dog1279	1	2	58	2	20	6	2	2	0	5	3	4	2	0	0	0	2	1	2	1	4	1	2	2	1	3	3	2	1	4	1	2	4	1	1	1	5	1	3	5	5	2	4	3	3	5	1	1	3
dog1280	0	2	100	4	50	33	2	2	1	4	3	5	1	0	3	0	2	4	1	2	2	1	2	2	2	4	2	3	2	1	1	3	3	3	1	1	5	3	1	1	4	1	5	1	5	5	1	4	4
dog1282	1	2	18	1	30	5	1	1	0	4	1	4	1	0	0	0	2	1	2	0	4	0	4	1	2	1	1	1	1	3	0	5	1	1	1	1	5	5	3	1	5	2	4	1	5	4	2	3	3
dog1283	0	1	108	4	18	10	2	1	0	2	3	4	3	0	4	1	2	2	1	1	2	0	1	2	2	4	2	1	2	3	0	4	2	3	3	1	5	4	3	2	4	1	5	3	3	4	2	3	3
dog1284	0	2	216	6	30	9	2	2	1	3	1	3	1	0	2	1	2	1	3	0	3	0	1	2	3	1	3	1	1	3	0	4	2	2	3	2	4	1	1	2	1	1	5	1	5	4	2	1	4
dog1285	1	1	17	1	33	15	2	2	0	5	3	1	3	0	0	0	2	1	1	1	3	0	2	2	2	4	3	2	3	2	1	5	1	1	1	1	5	4	3	1	5	1	5	1	5	3	3	1	3
dog1287	1	1	115	4	60	35	2	1	0	3	3	1	4	0	0	0	2	4	2	0	3	1	2	3	2	3	2	2	1	2	0	3	3	1	1	1	5	1	1	1	3	1	5	3	3	1	5	3	3
dog1288	1	1	89	3	43	40	1	1	0	5	2	4	1	0	0	0	2	1	1	1	3	0	3	3	2	3	1	2	1	2	1	1	5	2	3	4	2	2	4	5	5	5	1	3	3	3	3	4	2
dog1289	0	2	55	2	50	4	2	1	0	1	1	2	2	0	4	0	2	1	2	1	3	0	2	2	3	3	3	2	1	2	0	2	4	4	4	1	5	3	4	4	1	1	5	2	4	3	3	2	2
dog1291	0	1	130	5	20	6	1	2	0	3	2	2	1	0	4	0	2	3	2	1	2	0	2	1	3	4	4	3	2	2	0	5	1	1	1	1	5	5	1	1	1	1	5	1	5	5	1	3	3
dog1292	1	1	75	3	28	8	2	2	0	5	3	4	2	1	0	0	2	1	1	2	2	0	2	2	1	4	3	1	2	4	0	3	3	1	3	1	5	5	1	1	4	1	5	1	5	5	1	2	1
dog1294	1	1	36	2	30	4	1	2	0	2	2	2	1	0	0	0	2	1	2	1	2	0	2	1	3	4	3	1	2	4	0	5	1	1	1	1	5	5	1	1	3	5	1	1	5	5	1	3	5
dog1296	1	2	85	3	45	35	2	2	0	5	2	4	2	0	0	0	2	1	2	0	4	0	1	3	2	2	4	1	1	3	0	3	3	1	3	1	5	3	2	2	5	3	3	1	5	3	3	3	2
dog1297	1	2	22	1	60	30	2	2	0	3	3	3	2	0	0	0	1	1	3	0	3	0	1	2	3	4	2	1	3	3	0	1	5	1	2	1	5	4	3	1	5	1	5	1	5	3	3	5	1
dog1298	0	1	189	6	60	27	1	2	1	3	3	1	3	0	2	0	2	1	3	1	2	0	1	3	3	4	2	2	2	3	1	5	1	1	3	3	3	4	1	1	1	3	3	4	2	5	1	1	2
dog1299	0	2	94	3	30	15	1	2	0	2	2	4	2	1	4	0	2	2	2	0	4	0	2	3	3	1	3	1	1	1	0	1	5	1	2	1	5	2	2	2	2	2	4	2	4	3	3	2	2
dog1300	0	2	109	4	25	6	2	1	0	5	3	3	3	0	3	0	2	1	1	1	4	0	1	3	3	4	3	2	3	3	0	3	3	2	1	1	5	3	1	1	5	1	5	1	5	4	2	4	1
dog1302	1	2	134	5	60	25	2	1	0	3	1	3	1	0	0	0	2	4	2	0	3	1	4	1	3	2	3	1	1	3	1	1	5	1	3	3	3	5	4	1	5	4	2	2	4	3	3	2	4
dog1303	0	2	98	4	36	12	2	1	0	1	2	1	2	1	3	0	2	3	2	1	4	1	2	2	3	2	4	1	2	3	1	2	4	3	3	1	5	1	5	2	5	3	3	3	3	2	4	2	4
dog1304	0	1	168	6	50	30	2	1	1	5	3	1	2	0	4	0	1	3	1	2	3	1	2	2	2	3	1	1	1	3	0	2	4	2	2	3	3	4	4	1	1	3	3	3	3	3	3	2	2
dog1305	1	2	81	3	30	7	2	1	0	3	3	4	1	0	0	0	2	4	3	0	1	0	1	2	2	4	2	2	1	1	0	2	4	1	1	1	5	5	1	1	5	1	5	5	1	5	1	3	2
dog1306	1	1	126	5	50	15	1	2	0	3	1	5	3	0	0	0	2	1	2	1	2	0	1	3	3	4	3	3	3	3	0	5	1	2	2	1	5	5	1	1	5	5	1	2	4	3	3	3	1
dog1308	0	2	71	2	30	4	2	2	0	1	3	2	1	0	1	0	2	3	2	1	3	1	3	2	3	2	3	1	2	4	0	3	3	1	2	2	4	4	3	1	1	3	3	1	5	1	5		2
dog1309	0	1	89	3	20	3	2	1	0	3	3	3	1	1	1	0	2	3	2	0	3	1	2	2	3	1	2	1	2	2	0	2	4	1	2	1	5	1	2	4	5	5	1	5	1	3	3	3	1
dog1310	0	2	136	5	35	8	2	2	1	3	2	3	4	0	3	1	2	3	2	0	4	1	1	2	3	3	4	2	1	2	0	3	3	1	1	2	4	4	2	1	3	4	2	2	4	2	4	1	2
dog1312	0	1	69	2	65	30	2	1	0	3	1	5	3	0	4	1	1	3	2	1	2	0	4	2	3	4	2	2	1	2	0	5	1	1	1	2	4	3	1	1	4	2	4	1	5	4	2	1	3
dog1314	0	1	94	3	55	30	2	1	0	4	3	3	4	1	3	1	2	2	2	1	4	0	2	2	1	4	3	1	3	3	1	4	2	4	1	1	5	1	1	1	4	1	5	2	4	4	2	5	2
dog1315	1	1	69	2	60	37	2	1	0	2	3	1	2	0	0	0	2	2	2	1	2	0	1	2	3	4	1	2	2	2	0	4	2	1	1	1	5	4	1	1	3	2	4	3	3	4	2	3	1
dog1317	0	2	169	6	30	21	1	2	1	3	3	2	4	1	4	1	1	4	2	0	2	0	3	1	2	4	1	3	1	2	1	4	2	1	1	2	4	3	3	1	1	5	1	1	5	2	4	1	2
dog1318	1	2	118	4	45	13	1	2	0	2	1	2	1	1	0	0	1	4	2	1	2	0	1	1	1	1	1	1	2	3	1	2	4	1	2	1	5	3	3	1	4	1	5	4	2	3	3	3	3
dog1319	0	2	186	6	33	12	2	2	0	2	3	4	2	1	2	0	2	4	2	1	4	1	3	1	3	2	2	1	1	3	0	3	3	1	4	1	5	3	2	1	2	3	3	5	1	4	2	2	1
dog1320	0	1	101	4	30	5	2	2	0	3	1	4	2	1	2	0	2	2	3	0	2	0	1	2	3	2	3	1	1	1	1	1	5	5	5	3	3	4	4	5	3	3	3	2	4	2	4	4	3
dog1321	0	2	157	6	50	45	1	2	0	1	2	1	4	1	3	1	2	3	2	1	2	0	4	3	1	2	3	1	1	2	1	1	5	5	4	1	5	5	4	5	5	1	5	4	2	5	1	5	2
dog1322	0	2	114	4	30	5	2	2	0	2	3	1	4	1	2	1	2	3	3	1	3	1	4	1	3	3	3	1	1	3	1	5	1	3	3	1	5	3	3	1	4	2	4	1	5	3	3	2	2
dog1323	0	1	161	6	40	32	2	1	1	1	2	4	4	0	3	1	2	4	2	0	3	1	2	2	2	4	3	2	1	2	0	5	1	2	5	1	5	5	2	1	2	2	4	2	4	3	3	3	1
dog1324	1	1	61	2	35	8	2	1	0	2	1	3	2	0	0	0	2	2	3	1	2	0	2	2	2	4	3	1	3	3	0	3	3	3	2	1	5	3	3	1	5	1	5	3	3	5	1	4	1
dog1325	0	2	97	4	15	3	2	1	0	1	3	1	2	0	2	0	2	2	3	0	2	0	2	2	3	4	3	1	2	3	0	5	1	3	3	4	2	5	3	1	5	1	5	3	3	3	3	3	1
dog1326	1	1	60	2	25	9	2	2	0	3	2	2	4	0	0	0	1	2	3	1	3	1	2	2	3	4	4	2	1	3	0	4	2	2	1	2	4	4	1	2	2	3	3	1	5	5	1	3	1
dog1327	1	2	25	1	30	11	1	2	0	5	3	1	1	0	0	0	2	3	3	1	3	1	2	3	2	3	2	2	2	3	0	4	2	1	3	1	5	4	5	1	5	1	5	1	5	2	4	1	4
dog1329	0	2	59	2	22	5	2	2	0	1	2	2	4	1	4	0	1	3	3	0	1	0	4	1	3	3	2	1	1	3	0	1	5	1	3	1	5	3	5	4	1	3	3	1	5	3	3	3	3
dog1330	1	2	133	5	65	45	2	2	0	2	3	3	1	0	0	0	1	4	2	0	4	1	2	2	2	4	2	2	3	3	0	5	1	1	1	1	5	5	1	1	5	1	5	1	5	5	1	3	1
dog1332	0	1	121	5	17	6	2	2	1	1	3	2	2	0	1	1	2	4	2	1	2	0	1	2	3	4	2	1	2	4	0	5	1	1	3	1	5	4	4	1	2	2	4	1	5	2	4	1	2
dog1333	1	2	70	2	60	45	2	2	0	2	3	5	2	0	0	0	2	4	2	2	2	0	2	2	1	3	2	2	2	3	0	3	3	4	1	1	5	1	1	1	4	2	4	4	2	4	2	4	1
dog1334	0	2	107	4	55	20	1	1	0	2	1	5	2	1	4	0	2	2	1	2	3	1	1	2	2	1	1	2	1	3	0	2	4	1	4	2	4	3	4	1	2	3	3	1	5	3	3	3	1
dog1335	0	2	214	6	30	11	1	2	1	2	3	3	4	0	4	0	1	2	3	0	2	0	2	3	3	4	2	1	2	4	0	2	4	1	2	1	5	4	2	2	3	2	4	1	5	3	3	4	2
dog1336	0	1	155	6	20	7	2	1	1	3	3	4	3	1	3	1	2	2	1	0	3	0	1	2	1	4	4	2	2	4	1	4	2	2	2	2	4	4	1	1	4	3	3	1	5	5	1	3	3
dog1337	0	1	57	2	17	15	1	2	0	3	2	1	2	1	3	1	2	2	3	0	2	0	4	1	3	4	3	2	3	3	1	3	3	3	4	1	5	5	5	3	4	4	2	1	5	3	3	2	4
dog1338	1	2	63	2	50	14	1	2	0	2	1	3	1	1	0	0	1	1	3	1	2	0	4	1	3	3	3	1	3	3	0	1	5	4	5	1	5	2	2	4	4	1	5	4	2	5	1	1	1
dog1339	0	1	114	4	42	15	1	1	0	3	3	4	1	1	3	0	2	3	2	0	1	0	4	1	3	3	3	2	3	3	0	2	4	1	2	4	2	3	1	1	1	2	4	1	5	5	1	1	4
dog1340	0	1	116	4	27	7	2	1	0	3	3	1	4	0	1	0	2	2	1	1	4	0	2	2	2	4	3	2	2	2	0	5	1	2	2	2	4	2	1	1	1	2	4	2	4	4	2	1	1
dog1342	0	1	148	6	23	7	1	1	0	3	3	4	4	0	4	1	2	1	3	0	3	0	1	3	2	1	1	1	1	3	1	3	3	5	2	3	3	3	5	4	2	3	3	1	5	2	4	2	2
dog1343	0	2	91	3	50	32	1	2	0	3	3	4	3	1	3	1	2	2	3	1	2	0	3	1	3	4	3	2	3	4	0	1	5	2	1	2	4	5	4	1	5	1	5	1	5	3	3	3	3
dog1344	1	1	45	2	50	18	1	1	0	4	3	4	3	0	0	0	2	3	1	0	4	0	2	1	1	3	3	2	2	2	1	3	3	5	3	1	5	3	1	1	2	2	4	5	1	4	2	5	3
dog1346	0	2	75	3	62	30	2	2	0	2	3	1	1	1	3	0	2	1	1	0	4	0	1	2	2	4	3	3	2	2	1	3	3	5	3	1	5	4	1	4	5	5	1	1	5	5	1	5	1
dog1347	0	2	36	2	50	15	2	2	0	2	1	1	2	0	4	0	2	2	2	1	2	0	2	2	3	4	3	2	3	2	1	2	4	5	3	1	5	3	3	1	4	1	5	1	5	3	3	4	5
dog1348	0	2	56	2	37	10	1	2	1	3	3	3	1	0	4	0	2	3	2	0	1	0	2	3	2	3	2	1	1	3	0	2	4	2	2	1	5	4	1	2	4	3	3	1	5	3	3	1	3
dog1349	0	2	142	5	49	32	2	2	0	2	1	1	4	0	4	1	2	2	1	0	2	0	3	3	1	4	2	1	1	3	1	3	3	4	4	1	5	4	1	1	2	1	5	1	5	4	2	4	1
dog1350	0	1	57	2	20	4	2	2	0	1	3	1	2	0	1	0	2	2	3	1	2	0	2	2	3	4	3	1	3	4	0	1	5	4	4	1	5	4	3	4	4	2	4	2	4	3	3	5	3
dog1351	0	1	88	3	43	19	2	1	0	3	3	4	4	0	3	0	2	1	2	0	4	0	2	2	3	4	2	2	2	1	1	3	3	3	1	1	5	3	1	1	3	3	3	1	5	4	2	4	3
dog1352	0	2	93	3	30	10	1	2	0	4	3	3	3	1	3	1	2	1	3	1	2	0	3	1	3	4	4	2	2	3	0	4	2	1	3	4	2	5	3	1	5	4	2	1	5	3	3	4	2
dog1353	1	1	87	3	40	30	2	1	0	3	3	2	1	1	0	0	2	4	2	1	2	0	1	2	3	4	4	2	2	2	1	3	3	2	1	1	5	4	1	1	3	1	5	1	5	5	1	5	1
dog1354	0	2	80	3	40	6	2	1	0	4	3	3	4	0	1	1	2	4	3	1	1	0	2	3	3	4	4	2	1	2	0	3	3	1	1	1	5	5	3	1	3	3	3	1	5	4	2	3	1
dog1355	0	2	144	6	34	12	2	2	0	2	3	1	1	0	3	0	2	1	3	2	3	0	3	3	3	4	2	2	3	3	0	5	1	1	1	1	5	3	3	1		3	3	4	2	3	3	1	3
dog1356	1	2	15	1	55	31	2	1	0	3	3	5	4	0	0	0	2	4	2	0	3	1	2	2	3	4	3	2	2	2	0	5	1	1	1	1	5	5	1	1	2	1	5	1	5	4	2	1	1
dog1357	1	1	73	3	62	28	2	1	0	3	3	3	3	0	0	0	2	3	2	0	3	0	2	2	2	4	4	1	3	2	0	4	2	1	1	1	5	2	1	1	5	1	5	1	5	2	4	3	1
dog1358	0	2	97	4	56	28	1	2	1	1	3	3	3	1	3	1	2	1	2	1	4	0	3	1	3	4	2	2	1	2	1	4	2	2	2	2	4	4	1	3	5	2	4	1	5	5	1	3	2
dog1359	1	2	75	3	45	25	1	2	0	2	3	5	2	0	0	0	2	1	2	1	4	1	2	2	2	3	2	2	1	3	0	4	2	2	1	2	4	3	3	2	2	3	3	2	4	3	3	3	2
dog1360	1	2	72	3	20	6	2	1	0	3	2	5	3	1	0	0	2	2	2	0	2	0	4	3	3	3	3	1	2	4	1	2	4	1	2	1	5	5	3	1	5	4	2	2	4	2	4	1	4
dog1361	0	1	113	4	57	30	1	2	0	3	3	1	1	1	1	0	2	1	1	0	1	0	4	1	3	4	3	2	3	3	0	2	4	1	1	1	5	5	4	1	1	4	2	1	5	4	2	2	1
dog1362	0	2	103	4	65	32	1	2	0	1	3	1	1	1	1	0	2	3	3	0	4	1	1	3	3	2	2	1	2	3	1	2	4	4	4	1	5	1	3	1	5	3	3	4	2	2	4	4	1
dog1363	0	2	93	3	55	32	2	2	0	2	3	5	1	1	4	0	2	2	1	1	2	0	4	1	3	4	2	3	3	3	0	5	1	2	3	1	5	4	2	1	5	1	5	1	5	3	3	3	4
dog1364	0	1	158	6	48	17	1	2	0	2	2	5	4	0	2	0	2	2	1	2	2	0	1	1	3	4	2	3	3	3	0	4	2	1	1	1	5	5	1	1	1	3	3	1	5	5	1	5	1
dog1365	1	2	38	2	45	15	1	2	0	1	1	1	1	1	0	0	2	1	2	0	3	0	2	1	2	4	3	1	3	4	0	3	3	2	3	1	5	3	1	2	5	2	4	3	3	4	2	4	2
dog1366	0	2	56	2	50	28	2	2	0	2	3	1	4	0	2	1	2	2	3	0	2	0	1	2	3	4	3	2	3	3	0	2	4	1	2	2	4	4	3	1	4	3	3	1	5	4	2	2	2
dog1367	0	2	182	6	50	24	2	2	0	3	3	4	2	1	2	0	1	4	3	1	2	0	4	1	2	1	1	1	1	4	0	5	1	1	2	2	4	2	3	1	3	3	3	4	2	5	1	5	1
dog1368	1	2	22	1	40	23	1	2	0	3	3	3	2	1	0	0	2	1	2	0	2	0	3	1	3	4	3	2	3	3	0	1	5	1	1	1	5	5	3	5	5	1	5	1	5	3	3	1	1
dog1369	0	1	74	3	57	21	2	2	0	2	1	1	3	1	1	0	2	1	3	0	4	0	2	2	3	2	3	2	3	2	0	2	4	3	3	2	4	2	1	1	4	4	2	2	4	4	2	5	4
dog1370	1	2	29	1	53	23	2	2	0	2	1	1	4	1	0	0	2	1	1	1	2	0	3	3	3	4	4	3	3	3	1	4	2	2	1	1	5	3	1	1	5	5	1	1	5	5	1	4	2
dog1371	0	1	96	4	37	16	1	2	0	2	1	1	4	1	3	1	1	1	3	1	2	0	4	1	3	3	4	2	3	3	0	3	3	2	4	2	4	3	3	1	4	3	3	1	5	4	2	3	1
dog1372	1	2	30	1	60	20	2	2	0	2	3	1	2	0	0	0	2	2	1	0	2	0	2	2	3	4	3	2	3	4	0	3	3	1	2	1	5	3	3	1	4	3	3	3	3	3	3	3	2
dog1373	0	2	27	1	42	10	2	2	0	2	1	3	3	0	3	0	2	1	3	0	1	0	2	2	3	4	3	2	3	4	0	2	4	2	3	1	5	4	4	2	5	3	3	1	5	3	3	2	2
dog1374	0	2	56	2	50	21	2	2	0	4	3	5	2	1	1	1	2	1	1	2	2	0	2	2	3	4	3	2	3	2	0	5	1	1	1	1	5	4	1	1	5	1	5	1	5	5	1	5	1
[truncated: 66 more columns]

## Sheet: QUESTIONNAIRE_value_labels
id	Health_status	Sex	Age_in_months	Age_group	Height	Weight	Breed	Neuter_status	Sensory_problems	Offleash_activity	Body_condition_score	Food	Vitamins	Trauma	Health_problems	Medication	Owner_gender	Owner_age	Owner_experience	Other_dogs_in_house	People_in_household	Child	Age_of_dog_when_arrived	get_dog	Where_dog_is_kept	Dog_obedience_tasks	Play	Commands	Dog_training_activities	Time_dog_spend_alone	Dog_beh_changed_3month
dog2	Unhealthy	Female	139	10 - 12	43	9	Pure	Intact	No	More than 7 hours	Thin (BCS 1-2)	Mixed	Almost never	Yes	other disorders	No	Female	40 - 49 years	I have had a dog before	One	Four or more people	Yes	Less than 7 weeks	Born at my place/bought it	Fenced garden	2 kinds of tasks	Less than 30 mins	<10 commands	One activity	None	No
dog3	Healthy	Female	128	10 - 12	50	15	Mixed	Intact	No	More than 7 hours	Normal (BCS 3)	Mixed	Often	No	None	No	Male	>50 years	I have had a dog before	None	Two people	No	7 - 12 weeks	Got as a present	Fenced garden	3 kinds of tasks	more than 3 hours	<10 commands	2 - 3 activities	More than 8 hours	No
dog4	Unhealthy	Female	111	8 - 10	53	35	Mixed	Neutered	No	>1 - 3 hours	Over-weight (BCS 4-5)	Dry food only	Often	No	joint problems + tooth problems	No	Female	<29 years	I have never had a dog before	One	Three people	No	3 - 12 months	Got as a present	Urban/suburban apartment	3 kinds of tasks	more than 3 hours	<10 commands	4 or more activities	None	No
dog5	Unhealthy	Female	164	> 12	55	20	Mixed	Intact	No	More than 7 hours	Normal (BCS 3)	Dry food only	Rarely	No	joint problems	No	Female	30 - 39 years	I have had a dog before	Two or more	Three people	No	7 - 12 weeks	Got as a present	Fenced garden	Maximum a task	>1 - 3 hours	11 - 30 commands	2 - 3 activities	None	No
dog6	Unhealthy	Female	147	> 12	46	14	Pure	Neutered	No	30 mins - 1 hour	Thin (BCS 1-2)	Raw food	Rarely	No	joint problems	No	Female	40 - 49 years	Dogs are my hobby/profession	Two or more	Two people	Yes	7 - 12 weeks	Born at my place/bought it	Urban/suburban apartment	4 or more kinds of tasks	Less than 30 mins	11 - 30 commands	One activity	3 - 8 hours	Yes
dog7	Unhealthy	Male	102	8 - 10	50	35	Pure	Neutered	No	30 mins - 1 hour	Over-weight (BCS 4-5)	Dry food only	Almost never	No	joint problems + tooth problems	No	Female	40 - 49 years	I have had a dog before	One	Four or more people	Yes	3 - 12 months	Born at my place/bought it	Urban/suburban apartment	Maximum a task	30 mins - 1 hour	<10 commands	2 - 3 activities	1 - 2 hours	No
dog8	Healthy	Female	99	8 - 10	32	5	Pure	Neutered	No	>1 - 3 hours	Normal (BCS 3)	Dry food only	Regularly (daily)	No	None	No	Female	30 - 39 years	Dogs are my hobby/profession	Two or more	Two people	No	7 - 12 weeks	Born at my place/bought it	Urban/suburban apartment	4 or more kinds of tasks	>1 - 3 hours	>30 commands	4 or more activities	1 - 2 hours	No
dog9	Unhealthy	Female	122	10 - 12	55	33	Pure	Neutered	No	30 mins - 1 hour	Over-weight (BCS 4-5)	Dry food only	Regularly (daily)	No	other disorders	No	Female	30 - 39 years	I have had a dog before	Two or more	Four or more people	No	Less than 7 weeks	Born at my place/bought it	Fenced garden	4 or more kinds of tasks	>1 - 3 hours	11 - 30 commands	One activity	More than 8 hours	No
dog10	Healthy	Female	69	3 - 6	40	11	Pure	Neutered	No	30 mins - 1 hour	Normal (BCS 3)	Dry food only	Almost never	No	None	No	Female	30 - 39 years	I have had a dog before	Two or more	Four or more people	No	7 - 12 weeks	Born at my place/bought it	Fenced garden	4 or more kinds of tasks	30 mins - 1 hour	11 - 30 commands	2 - 3 activities	More than 8 hours	No
dog11	Unhealthy	Female	151	> 12	61	29	Mixed	Neutered	No	More than 7 hours	Thin (BCS 1-2)	Mixed	Rarely	No	tooth problems	No	Female	30 - 39 years	Dogs are my hobby/profession	Two or more	Four or more people	Yes	Less than 7 weeks	Born at my place/bought it	Fenced garden	4 or more kinds of tasks	30 mins - 1 hour	>30 commands	2 - 3 activities	None	No
dog12	Healthy	Female	97	8 - 10	43	18	Pure	Neutered	No	More than 7 hours	Normal (BCS 3)	Dry food only	Regularly (daily)	No	None	Yes	Male	>50 years	I have never had a dog before	One	Two people	No	7 - 12 weeks	Born at my place/bought it	Fenced garden	4 or more kinds of tasks	>1 - 3 hours	>30 commands	4 or more activities	None	No
dog13	Unhealthy	Female	138	10 - 12	40	20	Mixed	Neutered	No	Less than 30 mins	Normal (BCS 3)	Dry food only	Often	Yes	other disorders	No	Female	>50 years	I have never had a dog before	None	One person	No	3 - 12 months	Found it/shelter	Urban/suburban apartment	4 or more kinds of tasks	30 mins - 1 hour	<10 commands	2 - 3 activities	3 - 8 hours	Yes
dog15	Healthy	Male	42	3 - 6	72	40	Pure	Neutered	No	More than 7 hours	Normal (BCS 3)	Cooked food	Regularly (daily)	No	None	No	Female	>50 years	I have never had a dog before	None	Two people	No	7 - 12 weeks	Born at my place/bought it	House with garden/non fenced area	2 kinds of tasks	>1 - 3 hours	11 - 30 commands	2 - 3 activities	3 - 8 hours	No
dog16	Healthy	Male	63	3 - 6	54	40	Pure	Neutered	No	Less than 30 mins	Normal (BCS 3)	Dry food only	Often	Yes	None	No	Female	<29 years	Dogs are my hobby/profession	Two or more	Two people	No	7 - 12 weeks	Born at my place/bought it	House with garden/non fenced area	4 or more kinds of tasks	30 mins - 1 hour	11 - 30 commands	4 or more activities	1 - 2 hours	No
dog17	Healthy	Female	41	3 - 6	53	22	Pure	Neutered	No	>1 - 3 hours	Normal (BCS 3)	Cooked food	Rarely	No	None	No	Female	30 - 39 years	Dogs are my hobby/profession	None	Four or more people	No	7 - 12 weeks	Born at my place/bought it	Urban/suburban apartment	4 or more kinds of tasks	>1 - 3 hours	>30 commands	2 - 3 activities	1 - 2 hours	No
dog18	Unhealthy	Female	99	8 - 10	45	15	Mixed	Neutered	No	>3 - 7 hours	Normal (BCS 3)	Tinned and dry food	Rarely	Yes	joint problems + tooth problems	No	Female	<29 years	I have never had a dog before	One	Four or more people	No	7 - 12 weeks	Found it/shelter	House with garden/non fenced area	4 or more kinds of tasks	>1 - 3 hours	11 - 30 commands	2 - 3 activities	None	No
dog19	Unhealthy	Female	56	3 - 6	59	21	Pure	Intact	No	More than 7 hours	Normal (BCS 3)	Mixed	Almost never	No	joint problems	Yes	Female	40 - 49 years	I have had a dog before	One	Two people	No	7 - 12 weeks	Born at my place/bought it	Urban/suburban apartment	4 or more kinds of tasks	>1 - 3 hours	>30 commands	4 or more activities	1 - 2 hours	No
dog20	Healthy	Female	133	10 - 12	59	30	Pure	Intact	No	30 mins - 1 hour	Normal (BCS 3)	Dry food only	Almost never	No	None	No	Female	>50 years	I have never had a dog before	Two or more	Three people	Yes	7 - 12 weeks	Born at my place/bought it	Urban/suburban apartment	4 or more kinds of tasks	30 mins - 1 hour	11 - 30 commands	4 or more activities	1 - 2 hours	No
dog21	Healthy	Male	67	3 - 6	50	15	Mixed	Neutered	No	More than 7 hours	Normal (BCS 3)	Raw food	Almost never	Yes	None	No	Female	>50 years	Dogs are my hobby/profession	One	Two people	No	Less than 7 weeks	Got as a present	Fenced garden	3 kinds of tasks	30 mins - 1 hour	<10 commands	2 - 3 activities	1 - 2 hours	No
dog22	Unhealthy	Female	59	3 - 6	40	20	Pure	Neutered	Yes	More than 7 hours	Thin (BCS 1-2)	Mixed	Rarely	Yes	other disorders	No	Female	<29 years	Dogs are my hobby/profession	Two or more	Four or more people	Yes	7 - 12 weeks	Born at my place/bought it	Fenced garden	4 or more kinds of tasks	>1 - 3 hours	11 - 30 commands	2 - 3 activities	3 - 8 hours	No
dog23	Unhealthy	Male	133	10 - 12	40	19	Pure	Neutered	Yes	30 mins - 1 hour	Over-weight (BCS 4-5)	Tinned and dry food	Regularly (daily)	No	other disorders	Yes	Female	30 - 39 years	I have had a dog before	One	One person	No	More than a year	Got as a present	Urban/suburban apartment	4 or more kinds of tasks	>1 - 3 hours	<10 commands	4 or more activities	3 - 8 hours	Yes
dog24	Unhealthy	Female	132	10 - 12	40	35	Mixed	Neutered	No	30 mins - 1 hour	Over-weight (BCS 4-5)	Cooked food	Almost never	No	tooth problems	No	Female	40 - 49 years	I have had a dog before	Two or more	Two people	No	More than a year	Got as a present	Urban/suburban apartment	Maximum a task	30 mins - 1 hour	<10 commands	One activity	3 - 8 hours	No
dog25	Healthy	Female	127	10 - 12	40	10	Mixed	Neutered	No	30 mins - 1 hour	Thin (BCS 1-2)	Dry food only	Almost never	Yes	None	No	Female	<29 years	I have never had a dog before	One	Four or more people	Yes	More than a year	Got as a present	Urban/suburban apartment	4 or more kinds of tasks	>1 - 3 hours	>30 commands	4 or more activities	3 - 8 hours	No
dog26	Unhealthy	Male	124	10 - 12	42	20	Pure	Intact	No	>1 - 3 hours	Normal (BCS 3)	Mixed	Rarely	No	tooth problems	No	Female	>50 years	I have had a dog before	None	Four or more people	No	7 - 12 weeks	Born at my place/bought it	Urban/suburban apartment	3 kinds of tasks	>1 - 3 hours	>30 commands	4 or more activities	3 - 8 hours	No
dog27	Unhealthy	Female	124	10 - 12	40	19	Pure	Neutered	No	>1 - 3 hours	Normal (BCS 3)	Dry food only	Often	No	joint problems	No	Female	40 - 49 years	Dogs are my hobby/profession	Two or more	Four or more people	Yes	More than a year	Got as a present	Urban/suburban apartment	4 or more kinds of tasks	30 mins - 1 hour	>30 commands	2 - 3 activities	None	No
dog28	Unhealthy	Female	139	10 - 12	48	14	Pure	Neutered	Yes	>1 - 3 hours	Normal (BCS 3)	Dry food only	Rarely	Yes	joint problems + tooth problems	No	Female	<29 years	Dogs are my hobby/profession	One	Three people	No	7 - 12 weeks	Born at my place/bought it	Urban/suburban apartment	4 or more kinds of tasks	>1 - 3 hours	>30 commands	4 or more activities	3 - 8 hours	Yes
dog29	Healthy	Female	124	10 - 12	70	55	Pure	Intact	No	>1 - 3 hours	Over-weight (BCS 4-5)	Mixed	Almost never	No	None	No	Male	<29 years	I have had a dog before	None	Four or more people	No	Less than 7 weeks	Born at my place/bought it	Fenced garden	4 or more kinds of tasks	>1 - 3 hours	11 - 30 commands	One activity	1 - 2 hours	No
dog30	Unhealthy	Male	96	8 - 10	60	42	Mixed	Neutered	No	30 mins - 1 hour	Normal (BCS 3)	Dry food only	Almost never	No	joint problems	No	Female	>50 years	Dogs are my hobby/profession	One	Three people	No	More than a year	Found it/shelter	Urban/suburban apartment	4 or more kinds of tasks	30 mins - 1 hour	11 - 30 commands	2 - 3 activities	1 - 2 hours	Yes
dog31	Healthy	Female	69	3 - 6	67	27	Pure	Intact	No	>1 - 3 hours	Normal (BCS 3)	Dry food only	Almost never	No	None	No	Female	<29 years	Dogs are my hobby/profession	Two or more	Two people	No	7 - 12 weeks	Born at my place/bought it	Urban/suburban apartment	4 or more kinds of tasks	>1 - 3 hours	>30 commands	4 or more activities	3 - 8 hours	No
dog32	Unhealthy	Male	153	> 12	60	31	Mixed	Intact	Yes	30 mins - 1 hour	Normal (BCS 3)	Raw food	Regularly (daily)	No	joint problems	Yes	Female	40 - 49 years	I have had a dog before	Two or more	Four or more people	Yes	Less than 7 weeks	Born at my place/bought it	House with garden/non fenced area	2 kinds of tasks	30 mins - 1 hour	<10 commands	One activity	1 - 2 hours	No
dog33	Unhealthy	Female	99	8 - 10	62	28	Mixed	Neutered	No	>1 - 3 hours	Thin (BCS 1-2)	Cooked food	Rarely	Yes	joint problems	No	Male	>50 years	I have had a dog before	None	Three people	No	More than a year	Found it/shelter	Urban/suburban apartment	3 kinds of tasks	>1 - 3 hours	11 - 30 commands	4 or more activities	3 - 8 hours	No
dog34	Unhealthy	Female	172	> 12	20	7	Mixed	Neutered	Yes	Less than 30 mins	Over-weight (BCS 4-5)	Mixed	Almost never	No	other disorders	No	Female	<29 years	I have had a dog before	None	Four or more people	No	Less than 7 weeks	Born at my place/bought it	Urban/suburban apartment	2 kinds of tasks	30 mins - 1 hour	<10 commands	One activity	None	No
dog35	Unhealthy	Female	115	8 - 10	40	18	Pure	Neutered	Yes	>1 - 3 hours	Over-weight (BCS 4-5)	Mixed	Almost never	No	joint problems + tooth problems	No	Female	<29 years	I have had a dog before	None	Three people	No	3 - 12 months	Born at my place/bought it	Urban/suburban apartment	Maximum a task	Less than 30 mins	<10 commands	2 - 3 activities	3 - 8 hours	Yes
dog36	Unhealthy	Female	159	> 12	50	40	Pure	Neutered	Yes	More than 7 hours	Normal (BCS 3)	Tinned and dry food	Often	No	joint problems	Yes	Female	30 - 39 years	I have had a dog before	Two or more	Four or more people	No	3 - 12 months	Born at my place/bought it	Urban/suburban apartment	4 or more kinds of tasks	more than 3 hours	11 - 30 commands	One activity	1 - 2 hours	Yes
dog37	Unhealthy	Female	132	10 - 12	40	27	Mixed	Neutered	No	30 mins - 1 hour	Normal (BCS 3)	Mixed	Almost never	No	tooth problems	No	Female	>50 years	I have had a dog before	None	One person	No	3 - 12 months	Found it/shelter	House with garden/non fenced area	4 or more kinds of tasks	30 mins - 1 hour	11 - 30 commands	One activity	3 - 8 hours	No
dog38	Unhealthy	Female	204	> 12	43	18	Mixed	Neutered	Yes	>1 - 3 hours	Thin (BCS 1-2)	Mixed	Rarely	Yes	joint problems	No	Female	>50 years	I have had a dog before	None	Two people	No	More than a year	Found it/shelter	House with garden/non fenced area	4 or more kinds of tasks	more than 3 hours	11 - 30 commands	One activity	1 - 2 hours	Yes
dog39	Unhealthy	Female	109	8 - 10	39	17	Pure	Neutered	No	>3 - 7 hours	Normal (BCS 3)	Raw food	Regularly (daily)	No	joint problems	No	Female	30 - 39 years	Dogs are my hobby/profession	Two or more	Two people	No	7 - 12 weeks	Born at my place/bought it	Urban/suburban apartment	4 or more kinds of tasks	more than 3 hours	11 - 30 commands	4 or more activities	None	No
dog40	Healthy	Female	84	6 - 8	50	20	Mixed	Neutered	No	More than 7 hours	Thin (BCS 1-2)	Dry food only	Rarely	Yes	None	No	Female	<29 years	I have had a dog before	One	Three people	No	Less than 7 weeks	Got as a present	Fenced garden	4 or more kinds of tasks	30 mins - 1 hour	11 - 30 commands	2 - 3 activities	More than 8 hours	No
dog41	Unhealthy	Female	145	> 12	29	7	Mixed	Neutered	No	30 mins - 1 hour	Normal (BCS 3)	Dry food only	Rarely	Yes	tooth problems	No	Female	<29 years	Dogs are my hobby/profession	Two or more	Two people	No	More than a year	Found it/shelter	Urban/suburban apartment	4 or more kinds of tasks	Less than 30 mins	11 - 30 commands	4 or more activities	3 - 8 hours	Yes
dog43	Healthy	Female	134	10 - 12	64	28	Pure	Neutered	No	Less than 30 mins	Normal (BCS 3)	Raw food	Often	No	None	Yes	Female	>50 years	I have never had a dog before	One	Two people	No	More than a year	Born at my place/bought it	House with garden/non fenced area	4 or more kinds of tasks	more than 3 hours	11 - 30 commands	2 - 3 activities	None	No
dog44	Healthy	Male	92	6 - 8	45	30	Mixed	Intact	No	More than 7 hours	Normal (BCS 3)	Dry food only	Often	No	None	No	Female	30 - 39 years	Dogs are my hobby/profession	One	Two people	No	Less than 7 weeks	Got as a present	Fenced garden	4 or more kinds of tasks	30 mins - 1 hour	<10 commands	2 - 3 activities	More than 8 hours	No
dog45	Unhealthy	Male	218	> 12	35	16	Mixed	Neutered	Yes	30 mins - 1 hour	Over-weight (BCS 4-5)	Mixed	Regularly (daily)	Yes	joint problems	Yes	Female	40 - 49 years	I have had a dog before	None	Two people	No	More than a year	Found it/shelter	House with garden/non fenced area	Maximum a task	>1 - 3 hours	<10 commands	One activity	1 - 2 hours	Yes
dog46	Unhealthy	Female	77	6 - 8	43	20	Mixed	Neutered	No	30 mins - 1 hour	Normal (BCS 3)	Raw food	Regularly (daily)	Yes	other disorders	No	Female	<29 years	Dogs are my hobby/profession	Two or more	Three people	Yes	More than a year	Found it/shelter	Urban/suburban apartment	4 or more kinds of tasks	30 mins - 1 hour	<10 commands	4 or more activities	3 - 8 hours	Yes
dog47	Unhealthy	Female	26	1 - 3	45	20	Pure	Intact	No	More than 7 hours	Normal (BCS 3)	Mixed	Almost never	No	joint problems	No	Female	<29 years	I have had a dog before	None	Two people	No	Less than 7 weeks	Born at my place/bought it	Fenced garden	2 kinds of tasks	30 mins - 1 hour	11 - 30 commands	2 - 3 activities	More than 8 hours	No
dog48	Unhealthy	Male	170	> 12	50	8	Mixed	Intact	Yes	>1 - 3 hours	Normal (BCS 3)	Mixed	Rarely	Yes	tooth problems	No	Female	30 - 39 years	I have had a dog before	None	Two people	No	More than a year	Found it/shelter	Urban/suburban apartment	4 or more kinds of tasks	>1 - 3 hours	>30 commands	4 or more activities	1 - 2 hours	Yes
dog49	Healthy	Female	52	3 - 6	70	26	Pure	Neutered	No	30 mins - 1 hour	Normal (BCS 3)	Raw food	Regularly (daily)	No	None	No	Female	40 - 49 years	I have never had a dog before	One	Three people	No	More than a year	Got as a present	Urban/suburban apartment	4 or more kinds of tasks	>1 - 3 hours	11 - 30 commands	2 - 3 activities	3 - 8 hours	No
dog50	Healthy	Female	121	10 - 12	43	14	Pure	Neutered	No	More than 7 hours	Over-weight (BCS 4-5)	Raw food	Often	Yes	None	No	Male	>50 years	Dogs are my hobby/profession	One	Two people	No	More than a year	Born at my place/bought it	Fenced garden	3 kinds of tasks	30 mins - 1 hour	11 - 30 commands	2 - 3 activities	More than 8 hours	Yes
dog51	Healthy	Male	99	8 - 10	25	6	Pure	Neutered	No	30 mins - 1 hour	Normal (BCS 3)	Raw food	Regularly (daily)	No	None	No	Female	<29 years	I have had a dog before	One	Two people	No	Less than 7 weeks	Got as a present	Urban/suburban apartment	4 or more kinds of tasks	30 mins - 1 hour	11 - 30 commands	2 - 3 activities	3 - 8 hours	No
dog52	Unhealthy	Female	25	1 - 3	64	22	Pure	Intact	No	Less than 30 mins	Thin (BCS 1-2)	Raw food	Often	Yes	other disorders	No	Female	>50 years	I have had a dog before	One	Two people	No	7 - 12 weeks	Born at my place/bought it	House with garden/non fenced area	3 kinds of tasks	more than 3 hours	11 - 30 commands	2 - 3 activities	None	Yes
dog53	Healthy	Male	49	3 - 6	60	50	Pure	Intact	No	Less than 30 mins	Normal (BCS 3)	Mixed	Almost never	No	None	No	Female	<29 years	I have had a dog before	None	Four or more people	No	7 - 12 weeks	Born at my place/bought it	Fenced garden	4 or more kinds of tasks	30 mins - 1 hour	11 - 30 commands	2 - 3 activities	3 - 8 hours	No
dog54	Healthy	Male	16	1 - 3	47	13	Pure	Intact	No	>1 - 3 hours	Thin (BCS 1-2)	Raw food	Rarely	No	None	No	Female	<29 years	Dogs are my hobby/profession	One	Two people	No	3 - 12 months	Found it/shelter	Urban/suburban apartment	4 or more kinds of tasks	>1 - 3 hours	<10 commands	2 - 3 activities	1 - 2 hours	No
dog55	Unhealthy	Male	138	10 - 12	65	45	Pure	Intact	No	>1 - 3 hours	Normal (BCS 3)	Dry food only	Regularly (daily)	No	joint problems	Yes	Male	>50 years	I have had a dog before	Two or more	One person	No	7 - 12 weeks	Born at my place/bought it	Urban/suburban apartment	4 or more kinds of tasks	30 mins - 1 hour	11 - 30 commands	2 - 3 activities	None	No
dog56	Unhealthy	Male	145	> 12	40	27	Mixed	Intact	No	30 mins - 1 hour	Normal (BCS 3)	Dry food only	Regularly (daily)	No	joint problems + tooth problems	No	Female	30 - 39 years	Dogs are my hobby/profession	Two or more	Two people	No	7 - 12 weeks	Found it/shelter	Urban/suburban apartment	4 or more kinds of tasks	more than 3 hours	<10 commands	2 - 3 activities	3 - 8 hours	Yes
dog57	Unhealthy	Male	106	8 - 10	69	50	Pure	Intact	No	>1 - 3 hours	Normal (BCS 3)	Dry food only	Regularly (daily)	No	other disorders	No	Female	30 - 39 years	I have had a dog before	None	Four or more people	Yes	7 - 12 weeks	Born at my place/bought it	Urban/suburban apartment	4 or more kinds of tasks	30 mins - 1 hour	>30 commands	4 or more activities	1 - 2 hours	No
dog58	Healthy	Male	27	1 - 3	55	23	Pure	Intact	No	More than 7 hours	Thin (BCS 1-2)	Mixed	Almost never	No	None	No	Female	<29 years	I have had a dog before	None	Four or more people	No	7 - 12 weeks	Born at my place/bought it	Fenced garden	Maximum a task	30 mins - 1 hour	<10 commands	2 - 3 activities	3 - 8 hours	No
dog59	Healthy	Male	43	3 - 6	40	25	Mixed	Neutered	No	More than 7 hours	Normal (BCS 3)	Tinned and dry food	Often	Yes	None	No	Female	30 - 39 years	I have had a dog before	Two or more	Four or more people	No	7 - 12 weeks	Found it/shelter	Urban/suburban apartment	4 or more kinds of tasks	more than 3 hours	11 - 30 commands	2 - 3 activities	1 - 2 hours	No
dog60	Healthy	Male	27	1 - 3	50	20	Pure	Neutered	No	More than 7 hours	Thin (BCS 1-2)	Raw food	Often	Yes	None	No	Female	<29 years	Dogs are my hobby/profession	Two or more	Four or more people	No	3 - 12 months	Found it/shelter	Fenced garden	4 or more kinds of tasks	>1 - 3 hours	11 - 30 commands	4 or more activities	3 - 8 hours	No
dog61	Unhealthy	Male	145	> 12	60	35	Pure	Intact	Yes	>3 - 7 hours	Normal (BCS 3)	Dry food only	Regularly (daily)	No	joint problems	Yes	Female	<29 years	I have never had a dog before	None	Four or more people	No	7 - 12 weeks	Got as a present	Urban/suburban apartment	4 or more kinds of tasks	>1 - 3 hours	11 - 30 commands	2 - 3 activities	3 - 8 hours	Yes
dog62	Unhealthy	Female	94	6 - 8	56	23	Pure	Intact	No	More than 7 hours	Thin (BCS 1-2)	Mixed	Almost never	No	other disorders	Yes	Female	40 - 49 years	I have had a dog before	Two or more	Three people	Yes	7 - 12 weeks	Born at my place/bought it	Fenced garden	4 or more kinds of tasks	>1 - 3 hours	11 - 30 commands	2 - 3 activities	3 - 8 hours	No
dog63	Unhealthy	Female	79	6 - 8	53	38	Pure	Neutered	No	>1 - 3 hours	Normal (BCS 3)	Raw food	Often	No	joint problems	No	Female	40 - 49 years	I have never had a dog before	None	Two people	Yes	7 - 12 weeks	Born at my place/bought it	Urban/suburban apartment	4 or more kinds of tasks	>1 - 3 hours	11 - 30 commands	4 or more activities	3 - 8 hours	No
dog64	Healthy	Female	48	3 - 6	65	27	Pure	Neutered	No	>1 - 3 hours	Over-weight (BCS 4-5)	Raw food	Rarely	Yes	None	No	Female	30 - 39 years	Dogs are my hobby/profession	Two or more	Four or more people	Yes	Less than 7 weeks	Born at my place/bought it	Fenced garden	4 or more kinds of tasks	30 mins - 1 hour	11 - 30 commands	4 or more activities	3 - 8 hours	No
dog65	Unhealthy	Female	180	> 12	30	12	Mixed	Neutered	Yes	30 mins - 1 hour	Thin (BCS 1-2)	Mixed	Often	Yes	tooth problems	Yes	Male	>50 years	I have had a dog before	One	Two people	No	More than a year	Found it/shelter	Fenced garden	Maximum a task	Less than 30 mins	<10 commands	One activity	3 - 8 hours	No
dog66	Unhealthy	Male	96	8 - 10	50	23	Pure	Neutered	No	30 mins - 1 hour	Thin (BCS 1-2)	Dry food only	Rarely	Yes	other disorders	No	Female	40 - 49 years	Dogs are my hobby/profession	One	Four or more people	Yes	More than a year	Found it/shelter	Fenced garden	4 or more kinds of tasks	Less than 30 mins	11 - 30 commands	4 or more activities	3 - 8 hours	No
dog67	Healthy	Female	72	6 - 8	50	35	Mixed	Neutered	No	30 mins - 1 hour	Over-weight (BCS 4-5)	Mixed	Almost never	No	None	No	Female	>50 years	I have had a dog before	One	Two people	No	More than a year	Found it/shelter	House with garden/non fenced area	3 kinds of tasks	30 mins - 1 hour	11 - 30 commands	2 - 3 activities	1 - 2 hours	No
dog68	Unhealthy	Male	48	3 - 6	70	45	Mixed	Intact	No	>1 - 3 hours	Over-weight (BCS 4-5)	Mixed	Almost never	No	joint problems	No	Female	>50 years	I have had a dog before	One	Two people	No	Less than 7 weeks	Born at my place/bought it	House with garden/non fenced area	4 or more kinds of tasks	30 mins - 1 hour	<10 commands	2 - 3 activities	1 - 2 hours	Yes
dog69	Healthy	Female	132	10 - 12	55	20	Pure	Intact	No	>3 - 7 hours	Thin (BCS 1-2)	Tinned and dry food	Often	Yes	None	No	Female	<29 years	I have never had a dog before	One	Four or more people	No	Less than 7 weeks	Born at my place/bought it	Fenced garden	Maximum a task	>1 - 3 hours	<10 commands	One activity	3 - 8 hours	No
dog70	Unhealthy	Female	85	6 - 8	32	5	Pure	Neutered	No	>1 - 3 hours	Normal (BCS 3)	Dry food only	Almost never	Yes	tooth problems	No	Female	<29 years	I have had a dog before	One	Two people	No	7 - 12 weeks	Born at my place/bought it	Urban/suburban apartment	4 or more kinds of tasks	30 mins - 1 hour	11 - 30 commands	4 or more activities	3 - 8 hours	No
dog71	Unhealthy	Female	134	10 - 12	46	10	Pure	Neutered	No	30 mins - 1 hour	Normal (BCS 3)	Tinned and dry food	Often	No	tooth problems	No	Male	>50 years	Dogs are my hobby/profession	Two or more	Two people	No	3 - 12 months	Born at my place/bought it	Fenced garden	4 or more kinds of tasks	Less than 30 mins	11 - 30 commands	2 - 3 activities	More than 8 hours	Yes
dog72	Healthy	Male	132	10 - 12	65	48	Mixed	Neutered	No	>1 - 3 hours	Normal (BCS 3)	Tinned and dry food	Often	Yes	None	No	Female	<29 years	I have had a dog before	One	Four or more people	No	More than a year	Found it/shelter	Fenced garden	2 kinds of tasks	Less than 30 mins	<10 commands	One activity	3 - 8 hours	No
dog73	Unhealthy	Female	45	3 - 6	43	11	Pure	Neutered	Yes	>1 - 3 hours	Normal (BCS 3)	Raw food	Often	Yes	other disorders	No	Female	30 - 39 years	Dogs are my hobby/profession	None	Two people	No	More than a year	Got as a present	Urban/suburban apartment	4 or more kinds of tasks	>1 - 3 hours	11 - 30 commands	4 or more activities	3 - 8 hours	No
dog74	Unhealthy	Female	59	3 - 6	30	10	Mixed	Neutered	No	30 mins - 1 hour	Normal (BCS 3)	Tinned and dry food	Almost never	No	tooth problems	No	Male	<29 years	I have never had a dog before	None	Two people	No	More than a year	Found it/shelter	Urban/suburban apartment	3 kinds of tasks	Less than 30 mins	<10 commands	2 - 3 activities	1 - 2 hours	No
dog75	Healthy	Female	73	6 - 8	53	24	Pure	Neutered	No	>1 - 3 hours	Thin (BCS 1-2)	Raw food	Often	Yes	None	No	Female	<29 years	Dogs are my hobby/profession	One	One person	No	7 - 12 weeks	Born at my place/bought it	Urban/suburban apartment	4 or more kinds of tasks	>1 - 3 hours	>30 commands	4 or more activities	3 - 8 hours	No
dog76	Unhealthy	Female	154	> 12	45	35	Pure	Neutered	Yes	30 mins - 1 hour	Thin (BCS 1-2)	Dry food only	Rarely	No	joint problems	No	Female	30 - 39 years	I have never had a dog before	None	Four or more people	Yes	3 - 12 months	Born at my place/bought it	Urban/suburban apartment	2 kinds of tasks	>1 - 3 hours	<10 commands	2 - 3 activities	1 - 2 hours	Yes
dog77	Unhealthy	Male	117	8 - 10	25	9	Pure	Intact	No	30 mins - 1 hour	Normal (BCS 3)	Tinned and dry food	Often	No	tooth problems	No	Female	<29 years	I have never had a dog before	None	Three people	No	7 - 12 weeks	Born at my place/bought it	Urban/suburban apartment	Maximum a task	more than 3 hours	<10 commands	2 - 3 activities	3 - 8 hours	No
dog78	Unhealthy	Male	147	> 12	51	23	Pure	Neutered	Yes	>1 - 3 hours	Normal (BCS 3)	Dry food only	Regularly (daily)	Yes	joint problems	Yes	Female	30 - 39 years	Dogs are my hobby/profession	One	One person	No	7 - 12 weeks	Born at my place/bought it	Urban/suburban apartment	4 or more kinds of tasks	>1 - 3 hours	>30 commands	2 - 3 activities	More than 8 hours	Yes
dog79	Unhealthy	Female	122	10 - 12	30	8	Mixed	Neutered	No	30 mins - 1 hour	Normal (BCS 3)	Tinned and dry food	Rarely	Yes	tooth problems	No	Female	>50 years	I have had a dog before	Two or more	Three people	Yes	More than a year	Found it/shelter	Urban/suburban apartment	4 or more kinds of tasks	Less than 30 mins	<10 commands	2 - 3 activities	None	No
dog80	Unhealthy	Male	125	10 - 12	52	21	Pure	Neutered	No	>3 - 7 hours	Thin (BCS 1-2)	Dry food only	Regularly (daily)	Yes	other disorders	Yes	Female	30 - 39 years	Dogs are my hobby/profession	One	One person	No	More than a year	Got as a present	Urban/suburban apartment	4 or more kinds of tasks	>1 - 3 hours	>30 commands	2 - 3 activities	More than 8 hours	Yes
dog81	Healthy	Male	78	6 - 8	60	48	Pure	Intact	No	30 mins - 1 hour	Normal (BCS 3)	Mixed	Often	No	None	No	Female	>50 years	I have had a dog before	None	Two people	No	3 - 12 months	Born at my place/bought it	Fenced garden	2 kinds of tasks	>1 - 3 hours	11 - 30 commands	2 - 3 activities	3 - 8 hours	No
dog82	Unhealthy	Female	26	1 - 3	56	25	Pure	Intact	No	>3 - 7 hours	Normal (BCS 3)	Raw food	Regularly (daily)	No	other disorders	No	Female	<29 years	I have never had a dog before	Two or more	Four or more people	No	Less than 7 weeks	Born at my place/bought it	Urban/suburban apartment	4 or more kinds of tasks	>1 - 3 hours	11 - 30 commands	4 or more activities	1 - 2 hours	No
dog83	Healthy	Female	162	> 12	35	4	Pure	Neutered	No	>3 - 7 hours	Thin (BCS 1-2)	Cooked food	Almost never	No	None	No	Female	40 - 49 years	I have had a dog before	Two or more	Four or more people	Yes	7 - 12 weeks	Got as a present	Urban/suburban apartment	4 or more kinds of tasks	more than 3 hours	<10 commands	One activity	3 - 8 hours	Yes
dog84	Healthy	Male	121	10 - 12	60	22	Mixed	Neutered	No	More than 7 hours	Normal (BCS 3)	Dry food only	Rarely	Yes	None	No	Female	>50 years	I have had a dog before	Two or more	Three people	Yes	More than a year	Found it/shelter	Fenced garden	2 kinds of tasks	30 mins - 1 hour	<10 commands	2 - 3 activities	More than 8 hours	No
dog85	Unhealthy	Male	110	8 - 10	30	6	Mixed	Intact	Yes	More than 7 hours	Thin (BCS 1-2)	Mixed	Rarely	No	tooth problems	No	Female	30 - 39 years	Dogs are my hobby/profession	Two or more	Two people	No	7 - 12 weeks	Found it/shelter	Fenced garden	4 or more kinds of tasks	30 mins - 1 hour	11 - 30 commands	One activity	3 - 8 hours	No
dog86	Unhealthy	Male	123	10 - 12	56	30	Pure	Neutered	No	More than 7 hours	Normal (BCS 3)	Dry food only	Often	No	joint problems + tooth problems	No	Female	>50 years	Dogs are my hobby/profession	One	One person	No	7 - 12 weeks	Got as a present	House with garden/non fenced area	4 or more kinds of tasks	>1 - 3 hours	11 - 30 commands	2 - 3 activities	3 - 8 hours	No
dog87	Unhealthy	Female	46	3 - 6	30	7	Mixed	Neutered	No	30 mins - 1 hour	Normal (BCS 3)	Cooked food	Often	Yes	tooth problems	No	Female	40 - 49 years	I have had a dog before	Two or more	Two people	No	3 - 12 months	Got as a present	Urban/suburban apartment	3 kinds of tasks	30 mins - 1 hour	11 - 30 commands	2 - 3 activities	1 - 2 hours	No
dog88	Healthy	Female	159	> 12	47	22	Mixed	Neutered	No	More than 7 hours	Over-weight (BCS 4-5)	Mixed	Almost never	No	None	No	Female	40 - 49 years	I have had a dog before	None	Four or more people	Yes	Less than 7 weeks	Found it/shelter	Fenced garden	4 or more kinds of tasks	30 mins - 1 hour	11 - 30 commands	2 - 3 activities	3 - 8 hours	No
dog89	Unhealthy	Female	130	10 - 12	62	27	Mixed	Neutered	No	>1 - 3 hours	Normal (BCS 3)	Dry food only	Regularly (daily)	No	joint problems	No	Female	40 - 49 years	I have had a dog before	None	Three people	No	More than a year	Found it/shelter	Urban/suburban apartment	4 or more kinds of tasks	more than 3 hours	>30 commands	4 or more activities	3 - 8 hours	Yes
dog91	Healthy	Female	48	3 - 6	47	28	Pure	Neutered	No	>3 - 7 hours	Normal (BCS 3)	Cooked food	Regularly (daily)	No	None	No	Female	30 - 39 years	I have never had a dog before	None	Two people	No	Less than 7 weeks	Born at my place/bought it	Urban/suburban apartment	4 or more kinds of tasks	>1 - 3 hours	>30 commands	2 - 3 activities	3 - 8 hours	No
dog92	Unhealthy	Female	126	10 - 12	20	12	Mixed	Neutered	No	30 mins - 1 hour	Normal (BCS 3)	Raw food	Often	No	joint problems	No	Female	<29 years	I have had a dog before	One	Two people	No	Less than 7 weeks	Born at my place/bought it	Urban/suburban apartment	4 or more kinds of tasks	>1 - 3 hours	<10 commands	2 - 3 activities	More than 8 hours	Yes
dog93	Healthy	Male	153	> 12	44	10	Mixed	Intact	No	>3 - 7 hours	Normal (BCS 3)	Cooked food	Regularly (daily)	No	None	No	Female	30 - 39 years	I have had a dog before	Two or more	Two people	No	3 - 12 months	Got as a present	Fenced garden	Maximum a task	>1 - 3 hours	<10 commands	One activity	1 - 2 hours	No
dog94	Unhealthy	Female	69	3 - 6	56	27	Pure	Neutered	No	>1 - 3 hours	Thin (BCS 1-2)	Raw food	Regularly (daily)	No	joint problems	No	Female	40 - 49 years	I have had a dog before	None	Two people	No	7 - 12 weeks	Got as a present	Urban/suburban apartment	4 or more kinds of tasks	>1 - 3 hours	11 - 30 commands	4 or more activities	3 - 8 hours	No
dog95	Unhealthy	Male	188	> 12	62	20	Pure	Neutered	Yes	Less than 30 mins	Normal (BCS 3)	Cooked food	Often	No	joint problems	No	Female	30 - 39 years	Dogs are my hobby/profession	One	Four or more people	No	7 - 12 weeks	Born at my place/bought it	House with garden/non fenced area	Maximum a task	Less than 30 mins	<10 commands	One activity	None	Yes
dog96	Unhealthy	Male	73	6 - 8	60	40	Pure	Intact	No	>3 - 7 hours	Thin (BCS 1-2)	Cooked food	Regularly (daily)	No	other disorders	No	Female	40 - 49 years	I have had a dog before	None	Four or more people	Yes	7 - 12 weeks	Born at my place/bought it	Urban/suburban apartment	4 or more kinds of tasks	more than 3 hours	11 - 30 commands	One activity	1 - 2 hours	No
dog97	Healthy	Female	115	8 - 10	55	28	Mixed	Neutered	No	More than 7 hours	Normal (BCS 3)	Cooked food	Often	No	None	No	Female	30 - 39 years	I have had a dog before	Two or more	Three people	No	7 - 12 weeks	Found it/shelter	House with garden/non fenced area	4 or more kinds of tasks	30 mins - 1 hour	11 - 30 commands	One activity	1 - 2 hours	Yes
dog98	Unhealthy	Male	37	3 - 6	40	16	Pure	Neutered	No	>1 - 3 hours	Normal (BCS 3)	Cooked food	Rarely	No	tooth problems	No	Female	<29 years	I have never had a dog before	None	Two people	No	7 - 12 weeks	Born at my place/bought it	Urban/suburban apartment	4 or more kinds of tasks	>1 - 3 hours	11 - 30 commands	4 or more activities	1 - 2 hours	No
dog99	Unhealthy	Male	61	3 - 6	60	35	Pure	Intact	Yes	>1 - 3 hours	Normal (BCS 3)	Tinned and dry food	Almost never	No	joint problems + tooth problems	No	Female	40 - 49 years	I have had a dog before	One	Two people	No	Less than 7 weeks	Born at my place/bought it	Fenced garden	Maximum a task	Less than 30 mins	<10 commands	2 - 3 activities	More than 8 hours	Yes
dog100	Unhealthy	Female	89	6 - 8	60	25	Mixed	Neutered	No	More than 7 hours	Thin (BCS 1-2)	Cooked food	Regularly (daily)	Yes	joint problems	Yes	Female	40 - 49 years	Dogs are my hobby/profession	None	One person	No	7 - 12 weeks	Got as a present	Fenced garden	4 or more kinds of tasks	30 mins - 1 hour	>30 commands	2 - 3 activities	More than 8 hours	No
dog101	Unhealthy	Female	180	> 12	55	20	Pure	Neutered	Yes	>1 - 3 hours	Thin (BCS 1-2)	Dry food only	Often	Yes	tooth problems	No	Female	30 - 39 years	Dogs are my hobby/profession	Two or more	Two people	No	3 - 12 months	Got as a present	Urban/suburban apartment	3 kinds of tasks	>1 - 3 hours	11 - 30 commands	2 - 3 activities	3 - 8 hours	No
dog102	Unhealthy	Male	152	> 12	50	33	Mixed	Neutered	Yes	>3 - 7 hours	Over-weight (BCS 4-5)	Raw food	Regularly (daily)	Yes	joint problems + tooth problems	Yes	Female	40 - 49 years	I have had a dog before	Two or more	Three people	No	More than a year	Found it/shelter	Urban/suburban apartment	4 or more kinds of tasks	more than 3 hours	>30 commands	2 - 3 activities	3 - 8 hours	No
dog103	Unhealthy	Male	114	8 - 10	40	10	Pure	Neutered	No	Less than 30 mins	Normal (BCS 3)	Cooked food	Rarely	Yes	tooth problems	No	Female	>50 years	Dogs are my hobby/profession	Two or more	Two people	No	Less than 7 weeks	Born at my place/bought it	Fenced garden	4 or more kinds of tasks	>1 - 3 hours	>30 commands	2 - 3 activities	1 - 2 hours	No
dog104	Unhealthy	Male	89	6 - 8	54	24	Pure	Intact	No	>1 - 3 hours	Normal (BCS 3)	Raw food	Regularly (daily)	Yes	other disorders	No	Female	30 - 39 years	I have never had a dog before	One	Four or more people	Yes	7 - 12 weeks	Born at my place/bought it	House with garden/non fenced area	4 or more kinds of tasks	>1 - 3 hours	>30 commands	4 or more activities	None	No
dog105	Healthy	Female	80	6 - 8	58	20	Pure	Neutered	No	>1 - 3 hours	Thin (BCS 1-2)	Cooked food	Often	Yes	None	No	Female	30 - 39 years	Dogs are my hobby/profession	One	Four or more people	No	7 - 12 weeks	Born at my place/bought it	Urban/suburban apartment	4 or more kinds of tasks	>1 - 3 hours	>30 commands	4 or more activities	None	No
dog106	Unhealthy	Female	109	8 - 10	40	6	Mixed	Neutered	No	30 mins - 1 hour	Thin (BCS 1-2)	Dry food only	Rarely	Yes	tooth problems	Yes	Female	30 - 39 years	I have had a dog before	None	Two people	Yes	3 - 12 months	Got as a present	Urban/suburban apartment	4 or more kinds of tasks	Less than 30 mins	11 - 30 commands	2 - 3 activities	1 - 2 hours	No
dog107	Unhealthy	Female	132	10 - 12	37	10	Pure	Neutered	No	>3 - 7 hours	Normal (BCS 3)	Dry food only	Almost never	No	tooth problems	No	Female	30 - 39 years	Dogs are my hobby/profession	One	Four or more people	Yes	7 - 12 weeks	Born at my place/bought it	Urban/suburban apartment	4 or more kinds of tasks	more than 3 hours	11 - 30 commands	2 - 3 activities	1 - 2 hours	No
dog110	Healthy	Female	90	6 - 8	63	24	Pure	Neutered	No	>3 - 7 hours	Thin (BCS 1-2)	Raw food	Rarely	Yes	None	No	Female	40 - 49 years	I have never had a dog before	None	Two people	No	More than a year	Found it/shelter	Urban/suburban apartment	4 or more kinds of tasks	>1 - 3 hours	<10 commands	2 - 3 activities	3 - 8 hours	Yes
dog111	Unhealthy	Male	119	8 - 10	60	30	Pure	Neutered	No	More than 7 hours	Normal (BCS 3)	Cooked food	Regularly (daily)	Yes	other disorders	No	Female	40 - 49 years	I have never had a dog before	Two or more	One person	No	More than a year	Found it/shelter	Fenced garden	3 kinds of tasks	>1 - 3 hours	11 - 30 commands	2 - 3 activities	3 - 8 hours	No
dog112	Unhealthy	Female	131	10 - 12	60	28	Pure	Intact	No	>1 - 3 hours	Normal (BCS 3)	Cooked food	Often	Yes	joint problems + tooth problems	No	Female	30 - 39 years	I have had a dog before	None	Two people	No	Less than 7 weeks	Got as a present	Urban/suburban apartment	4 or more kinds of tasks	30 mins - 1 hour	<10 commands	4 or more activities	3 - 8 hours	Yes
dog113	Healthy	Female	109	8 - 10	30	8	Pure	Neutered	No	30 mins - 1 hour	Normal (BCS 3)	Tinned and dry food	Almost never	No	None	No	Female	40 - 49 years	I have had a dog before	None	Four or more people	Yes	More than a year	Found it/shelter	Urban/suburban apartment	Maximum a task	>1 - 3 hours	11 - 30 commands	2 - 3 activities	3 - 8 hours	No
dog114	Unhealthy	Female	75	6 - 8	50	19	Pure	Neutered	No	30 mins - 1 hour	Thin (BCS 1-2)	Dry food only	Regularly (daily)	Yes	joint problems + tooth problems	Yes	Female	<29 years	Dogs are my hobby/profession	None	Four or more people	Yes	7 - 12 weeks	Born at my place/bought it	Urban/suburban apartment	4 or more kinds of tasks	30 mins - 1 hour	>30 commands	2 - 3 activities	More than 8 hours	No
dog115	Healthy	Female	101	8 - 10	60	29	Mixed	Neutered	No	>1 - 3 hours	Thin (BCS 1-2)	Cooked food	Rarely	Yes	None	No	Female	30 - 39 years	Dogs are my hobby/profession	None	Three people	Yes	More than a year	Found it/shelter	House with garden/non fenced area	4 or more kinds of tasks	>1 - 3 hours	>30 commands	4 or more activities	3 - 8 hours	No
dog116	Unhealthy	Female	193	> 12	55	27	Pure	Intact	Yes	More than 7 hours	Thin (BCS 1-2)	Cooked food	Often	No	joint problems	No	Female	<29 years	I have never had a dog before	None	Three people	No	7 - 12 weeks	Got as a present	Fenced garden	3 kinds of tasks	>1 - 3 hours	<10 commands	One activity	3 - 8 hours	Yes
dog117	Unhealthy	Male	186	> 12	40	9	Mixed	Intact	Yes	30 mins - 1 hour	Normal (BCS 3)	Raw food	Regularly (daily)	No	joint problems	Yes	Female	30 - 39 years	I have had a dog before	Two or more	Two people	No	More than a year	Found it/shelter	Urban/suburban apartment	2 kinds of tasks	30 mins - 1 hour	11 - 30 commands	2 - 3 activities	1 - 2 hours	No
dog118	Healthy	Female	109	8 - 10	56	35	Pure	Intact	No	>3 - 7 hours	Over-weight (BCS 4-5)	Cooked food	Almost never	Yes	None	No	Female	>50 years	Dogs are my hobby/profession	Two or more	Two people	Yes	Less than 7 weeks	Born at my place/bought it	Urban/suburban apartment	4 or more kinds of tasks	more than 3 hours	11 - 30 commands	2 - 3 activities	None	No
dog119	Unhealthy	Female	57	3 - 6	48	14	Mixed	Neutered	Yes	>3 - 7 hours	Thin (BCS 1-2)	Raw food	Often	Yes	tooth problems	No	Female	30 - 39 years	Dogs are my hobby/profession	Two or more	Two people	No	3 - 12 months	Found it/shelter	Urban/suburban apartment	4 or more kinds of tasks	more than 3 hours	11 - 30 commands	2 - 3 activities	None	No
dog120	Healthy	Female	21	1 - 3	49	15	Pure	Neutered	No	>3 - 7 hours	Over-weight (BCS 4-5)	Raw food	Often	Yes	None	No	Female	30 - 39 years	Dogs are my hobby/profession	One	Two people	No	7 - 12 weeks	Born at my place/bought it	Urban/suburban apartment	4 or more kinds of tasks	more than 3 hours	11 - 30 commands	2 - 3 activities	None	No
dog121	Healthy	Female	93	6 - 8	40	35	Pure	Neutered	No	>3 - 7 hours	Normal (BCS 3)	Cooked food	Regularly (daily)	No	None	No	Female	40 - 49 years	I have had a dog before	One	Four or more people	No	More than a year	Found it/shelter	Urban/suburban apartment	4 or more kinds of tasks	30 mins - 1 hour	11 - 30 commands	2 - 3 activities	1 - 2 hours	No
dog122	Healthy	Female	73	6 - 8	55	22	Mixed	Intact	No	>1 - 3 hours	Normal (BCS 3)	Raw food	Rarely	Yes	None	No	Female	>50 years	I have had a dog before	None	Four or more people	No	3 - 12 months	Found it/shelter	Urban/suburban apartment	4 or more kinds of tasks	30 mins - 1 hour	11 - 30 commands	2 - 3 activities	1 - 2 hours	No
dog123	Unhealthy	Female	45	3 - 6	25	15	Mixed	Neutered	No	30 mins - 1 hour	Normal (BCS 3)	Mixed	Almost never	Yes	other disorders	No	Male	40 - 49 years	I have had a dog before	Two or more	Three people	No	7 - 12 weeks	Found it/shelter	Urban/suburban apartment	4 or more kinds of tasks	>1 - 3 hours	<10 commands	4 or more activities	3 - 8 hours	No
dog124	Unhealthy	Male	120	10 - 12	18	3	Pure	Neutered	No	>1 - 3 hours	Normal (BCS 3)	Dry food only	Almost never	No	joint problems + tooth problems	No	Female	40 - 49 years	I have never had a dog before	None	Four or more people	Yes	Less than 7 weeks	Born at my place/bought it	Urban/suburban apartment	4 or more kinds of tasks	30 mins - 1 hour	<10 commands	One activity	More than 8 hours	No
dog125	Unhealthy	Male	122	10 - 12	28	8	Pure	Neutered	No	>1 - 3 hours	Normal (BCS 3)	Raw food	Regularly (daily)	Yes	other disorders	No	Female	>50 years	I have had a dog before	Two or more	Two people	No	3 - 12 months	Got as a present	Urban/suburban apartment	4 or more kinds of tasks	>1 - 3 hours	11 - 30 commands	4 or more activities	1 - 2 hours	No
dog126	Unhealthy	Female	108	8 - 10	50	23	Pure	Neutered	No	>3 - 7 hours	Normal (BCS 3)	Cooked food	Almost never	Yes	joint problems	No	Female	>50 years	I have never had a dog before	One	One person	No	7 - 12 weeks	Born at my place/bought it	Fenced garden	4 or more kinds of tasks	30 mins - 1 hour	<10 commands	2 - 3 activities	More than 8 hours	No
dog127	Unhealthy	Female	106	8 - 10	30	14	Mixed	Neutered	No	>3 - 7 hours	Normal (BCS 3)	Tinned and dry food	Almost never	Yes	joint problems	No	Female	<29 years	I have had a dog before	One	Four or more people	No	3 - 12 months	Got as a present	House with garden/non fenced area	Maximum a task	30 mins - 1 hour	<10 commands	4 or more activities	3 - 8 hours	No
dog128	Healthy	Female	145	> 12	25	7	Mixed	Intact	No	Less than 30 mins	Over-weight (BCS 4-5)	Raw food	Almost never	Yes	None	No	Female	>50 years	I have had a dog before	None	Two people	No	Less than 7 weeks	Born at my place/bought it	Urban/suburban apartment	Maximum a task	more than 3 hours	<10 commands	2 - 3 activities	1 - 2 hours	Yes
dog129	Unhealthy	Female	189	> 12	50	25	Pure	Neutered	Yes	Less than 30 mins	Thin (BCS 1-2)	Mixed	Almost never	Yes	joint problems + tooth problems	Yes	Female	<29 years	I have never had a dog before	Two or more	Three people	Yes	7 - 12 weeks	Born at my place/bought it	Fenced garden	2 kinds of tasks	Less than 30 mins	<10 commands	One activity	3 - 8 hours	No
dog130	Unhealthy	Female	99	8 - 10	63	45	Pure	Neutered	No	30 mins - 1 hour	Normal (BCS 3)	Mixed	Rarely	No	tooth problems	Yes	Female	<29 years	Dogs are my hobby/profession	Two or more	Three people	No	3 - 12 months	Born at my place/bought it	Urban/suburban apartment	Maximum a task	Less than 30 mins	<10 commands	2 - 3 activities	1 - 2 hours	No
dog131	Healthy	Male	61	3 - 6	60	26	Pure	Intact	No	More than 7 hours	Normal (BCS 3)	Mixed	Almost never	No	None	No	Female	<29 years	I have had a dog before	One	Four or more people	No	7 - 12 weeks	Born at my place/bought it	Fenced garden	4 or more kinds of tasks	>1 - 3 hours	<10 commands	2 - 3 activities	3 - 8 hours	No
dog132	Unhealthy	Female	144	> 12	50	40	Mixed	Intact	Yes	More than 7 hours	Normal (BCS 3)	Cooked food	Often	No	joint problems + tooth problems	No	Female	<29 years	I have had a dog before	None	Four or more people	No	Less than 7 weeks	Found it/shelter	Fenced garden	Maximum a task	more than 3 hours	>30 commands	One activity	None	Yes
dog133	Healthy	Female	86	6 - 8	35	7	Pure	Neutered	No	30 mins - 1 hour	Thin (BCS 1-2)	Raw food	Almost never	Yes	None	No	Female	30 - 39 years	I have never had a dog before	None	Two people	No	7 - 12 weeks	Born at my place/bought it	Urban/suburban apartment	4 or more kinds of tasks	Less than 30 mins	11 - 30 commands	4 or more activities	3 - 8 hours	No
dog134	Healthy	Male	35	1 - 3	45	12	Pure	Neutered	No	>1 - 3 hours	Normal (BCS 3)	Raw food	Rarely	No	None	No	Female	<29 years	I have had a dog before	Two or more	Three people	No	7 - 12 weeks	Born at my place/bought it	Urban/suburban apartment	4 or more kinds of tasks	>1 - 3 hours	>30 commands	4 or more activities	1 - 2 hours	No
dog135	Unhealthy	Female	134	10 - 12	50	33	Pure	Neutered	Yes	30 mins - 1 hour	Over-weight (BCS 4-5)	Dry food only	Regularly (daily)	No	joint problems + tooth problems	Yes	Female	<29 years	I have had a dog before	None	Two people	No	7 - 12 weeks	Born at my place/bought it	House with garden/non fenced area	4 or more kinds of tasks	Less than 30 mins	11 - 30 commands	2 - 3 activities	More than 8 hours	No
dog136	Healthy	Female	82	6 - 8	45	25	Pure	Neutered	No	30 mins - 1 hour	Over-weight (BCS 4-5)	Tinned and dry food	Rarely	Yes	None	No	Female	30 - 39 years	I have had a dog before	None	Two people	No	3 - 12 months	Found it/shelter	Urban/suburban apartment	4 or more kinds of tasks	>1 - 3 hours	11 - 30 commands	2 - 3 activities	3 - 8 hours	No
dog137	Unhealthy	Male	42	3 - 6	60	30	Mixed	Neutered	No	>1 - 3 hours	Normal (BCS 3)	Raw food	Almost never	Yes	tooth problems	No	Female	30 - 39 years	I have had a dog before	Two or more	Two people	No	3 - 12 months	Found it/shelter	Urban/suburban apartment	4 or more kinds of tasks	>1 - 3 hours	11 - 30 commands	4 or more activities	1 - 2 hours	Yes
dog138	Unhealthy	Male	75	6 - 8	51	23	Pure	Intact	No	>3 - 7 hours	Normal (BCS 3)	Raw food	Rarely	No	tooth problems	No	Female	<29 years	I have had a dog before	None	Four or more people	No	7 - 12 weeks	Born at my place/bought it	Urban/suburban apartment	4 or more kinds of tasks	30 mins - 1 hour	11 - 30 commands	4 or more activities	3 - 8 hours	No
dog139	Unhealthy	Male	102	8 - 10	35	15	Pure	Neutered	Yes	30 mins - 1 hour	Thin (BCS 1-2)	Dry food only	Regularly (daily)	No	other disorders	No	Female	30 - 39 years	I have had a dog before	None	One person	No	More than a year	Found it/shelter	Urban/suburban apartment	3 kinds of tasks	>1 - 3 hours	<10 commands	4 or more activities	More than 8 hours	Yes
dog140	Healthy	Female	97	8 - 10	50	25	Mixed	Neutered	No	>1 - 3 hours	Normal (BCS 3)	Cooked food	Almost never	Yes	None	No	Female	30 - 39 years	I have had a dog before	One	One person	No	More than a year	Found it/shelter	Urban/suburban apartment	3 kinds of tasks	>1 - 3 hours	<10 commands	2 - 3 activities	More than 8 hours	No
dog141	Unhealthy	Female	38	3 - 6	54	20	Pure	Intact	No	>3 - 7 hours	Normal (BCS 3)	Cooked food	Almost never	No	other disorders	No	Female	40 - 49 years	I have had a dog before	None	One person	No	7 - 12 weeks	Born at my place/bought it	Urban/suburban apartment	4 or more kinds of tasks	more than 3 hours	>30 commands	2 - 3 activities	3 - 8 hours	No
dog142	Healthy	Female	41	3 - 6	20	9	Pure	Neutered	No	>3 - 7 hours	Normal (BCS 3)	Dry food only	Almost never	No	None	No	Female	30 - 39 years	I have had a dog before	One	Three people	Yes	Less than 7 weeks	Got as a present	Urban/suburban apartment	4 or more kinds of tasks	>1 - 3 hours	11 - 30 commands	4 or more activities	1 - 2 hours	No
dog143	Healthy	Male	26	1 - 3	77	46	Pure	Intact	No	More than 7 hours	Thin (BCS 1-2)	Dry food only	Regularly (daily)	Yes	None	No	Male	30 - 39 years	I have had a dog before	None	Four or more people	Yes	7 - 12 weeks	Born at my place/bought it	Fenced garden	4 or more kinds of tasks	30 mins - 1 hour	11 - 30 commands	4 or more activities	3 - 8 hours	No
dog145	Unhealthy	Female	125	10 - 12	56	40	Pure	Neutered	Yes	30 mins - 1 hour	Over-weight (BCS 4-5)	Raw food	Often	No	joint problems + tooth problems	No	Female	>50 years	Dogs are my hobby/profession	Two or more	Four or more people	Yes	More than a year	Got as a present	Fenced garden	4 or more kinds of tasks	>1 - 3 hours	11 - 30 commands	One activity	3 - 8 hours	Yes
dog146	Healthy	Male	52	3 - 6	60	23	Pure	Intact	No	>3 - 7 hours	Thin (BCS 1-2)	Tinned and dry food	Almost never	No	None	No	Female	30 - 39 years	I have never had a dog before	One	Two people	No	7 - 12 weeks	Born at my place/bought it	Urban/suburban apartment	4 or more kinds of tasks	>1 - 3 hours	11 - 30 commands	4 or more activities	1 - 2 hours	No
dog147	Healthy	Male	12	1 - 3	65	42	Pure	Intact	No	>1 - 3 hours	Normal (BCS 3)	Raw food	Regularly (daily)	No	None	No	Female	40 - 49 years	I have never had a dog before	One	One person	No	3 - 12 months	Born at my place/bought it	Urban/suburban apartment	4 or more kinds of tasks	>1 - 3 hours	<10 commands	2 - 3 activities	3 - 8 hours	No
dog148	Healthy	Female	125	10 - 12	43	20	Mixed	Neutered	No	30 mins - 1 hour	Normal (BCS 3)	Raw food	Almost never	No	None	No	Female	30 - 39 years	Dogs are my hobby/profession	Two or more	Three people	Yes	3 - 12 months	Found it/shelter	House with garden/non fenced area	4 or more kinds of tasks	Less than 30 mins	>30 commands	2 - 3 activities	3 - 8 hours	Yes
dog149	Unhealthy	Female	192	> 12	52	18	Mixed	Neutered	Yes	>3 - 7 hours	Normal (BCS 3)	Cooked food	Often	No	tooth problems	Yes	Female	<29 years	Dogs are my hobby/profession	One	Four or more people	No	Less than 7 weeks	Born at my place/bought it	Fenced garden	3 kinds of tasks	Less than 30 mins	<10 commands	One activity	1 - 2 hours	No
dog150	Healthy	Female	39	3 - 6	82	60	Pure	Intact	No	30 mins - 1 hour	Normal (BCS 3)	Raw food	Almost never	No	None	No	Female	30 - 39 years	Dogs are my hobby/profession	Two or more	Three people	Yes	3 - 12 months	Born at my place/bought it	House with garden/non fenced area	4 or more kinds of tasks	30 mins - 1 hour	11 - 30 commands	2 - 3 activities	3 - 8 hours	No
dog151	Unhealthy	Female	102	8 - 10	35	14	Pure	Neutered	No	30 mins - 1 hour	Normal (BCS 3)	Cooked food	Regularly (daily)	Yes	tooth problems	No	Female	30 - 39 years	I have had a dog before	None	Two people	No	More than a year	Found it/shelter	Urban/suburban apartment	4 or more kinds of tasks	30 mins - 1 hour	<10 commands	4 or more activities	More than 8 hours	No
dog152	Unhealthy	Female	81	6 - 8	25	3	Pure	Intact	No	>1 - 3 hours	Normal (BCS 3)	Cooked food	Regularly (daily)	Yes	tooth problems	Yes	Female	40 - 49 years	I have never had a dog before	None	One person	No	Less than 7 weeks	Got as a present	Urban/suburban apartment	4 or more kinds of tasks	more than 3 hours	>30 commands	2 - 3 activities	1 - 2 hours	No
dog153	Healthy	Male	97	8 - 10	74	35	Mixed	Intact	No	More than 7 hours	Normal (BCS 3)	Raw food	Rarely	No	None	No	Male	40 - 49 years	Dogs are my hobby/profession	Two or more	Four or more people	Yes	Less than 7 weeks	Born at my place/bought it	Urban/suburban apartment	2 kinds of tasks	Less than 30 mins	11 - 30 commands	One activity	None	No
dog154	Healthy	Female	31	1 - 3	50	38	Pure	Intact	No	More than 7 hours	Normal (BCS 3)	Mixed	Rarely	No	None	No	Female	>50 years	I have had a dog before	None	Four or more people	Yes	3 - 12 months	Born at my place/bought it	Urban/suburban apartment	4 or more kinds of tasks	30 mins - 1 hour	11 - 30 commands	2 - 3 activities	3 - 8 hours	No
dog155	Unhealthy	Male	133	10 - 12	40	35	Mixed	Intact	No	>3 - 7 hours	Over-weight (BCS 4-5)	Mixed	Rarely	No	tooth problems	No	Female	40 - 49 years	I have had a dog before	Two or more	Four or more people	Yes	Less than 7 weeks	Found it/shelter	Fenced garden	Maximum a task	Less than 30 mins	<10 commands	One activity	3 - 8 hours	No
dog156	Healthy	Male	43	3 - 6	50	17	Mixed	Neutered	No	30 mins - 1 hour	Normal (BCS 3)	Raw food	Almost never	No	None	No	Female	30 - 39 years	I have never had a dog before	None	Four or more people	Yes	3 - 12 months	Found it/shelter	Fenced garden	4 or more kinds of tasks	30 mins - 1 hour	11 - 30 commands	2 - 3 activities	More than 8 hours	No
dog159	Unhealthy	Female	144	> 12	20	7	Mixed	Neutered	No	>1 - 3 hours	Normal (BCS 3)	Cooked food	Regularly (daily)	Yes	tooth problems	No	Female	>50 years	I have had a dog before	One	Two people	No	Less than 7 weeks	Found it/shelter	Urban/suburban apartment	4 or more kinds of tasks	more than 3 hours	<10 commands	2 - 3 activities	3 - 8 hours	No
dog160	Unhealthy	Male	132	10 - 12	70	41	Pure	Neutered	Yes	30 mins - 1 hour	Thin (BCS 1-2)	Dry food only	Regularly (daily)	No	joint problems	Yes	Female	40 - 49 years	Dogs are my hobby/profession	Two or more	Three people	Yes	7 - 12 weeks	Born at my place/bought it	House with garden/non fenced area	Maximum a task	30 mins - 1 hour	>30 commands	2 - 3 activities	1 - 2 hours	Yes
dog161	Healthy	Female	120	10 - 12	50	19	Mixed	Neutered	No	>1 - 3 hours	Normal (BCS 3)	Dry food only	Almost never	Yes	None	No	Female	40 - 49 years	Dogs are my hobby/profession	Two or more	Three people	Yes	More than a year	Found it/shelter	Fenced garden	2 kinds of tasks	Less than 30 mins	<10 commands	2 - 3 activities	1 - 2 hours	No
dog162	Healthy	Female	40	3 - 6	70	30	Pure	Neutered	No	More than 7 hours	Normal (BCS 3)	Tinned and dry food	Often	No	None	No	Female	<29 years	I have had a dog before	Two or more	Three people	No	7 - 12 weeks	Got as a present	Fenced garden	2 kinds of tasks	Less than 30 mins	<10 commands	One activity	More than 8 hours	No
dog163	Healthy	Female	51	3 - 6	58	46	Pure	Intact	No	>1 - 3 hours	Normal (BCS 3)	Raw food	Regularly (daily)	No	None	No	Female	40 - 49 years	Dogs are my hobby/profession	Two or more	Two people	No	7 - 12 weeks	Born at my place/bought it	Urban/suburban apartment	3 kinds of tasks	>1 - 3 hours	11 - 30 commands	2 - 3 activities	3 - 8 hours	No
dog164	Healthy	Male	25	1 - 3	70	25	Pure	Intact	No	>1 - 3 hours	Thin (BCS 1-2)	Mixed	Rarely	No	None	No	Female	40 - 49 years	I have never had a dog before	Two or more	Three people	Yes	7 - 12 weeks	Born at my place/bought it	Urban/suburban apartment	4 or more kinds of tasks	more than 3 hours	>30 commands	2 - 3 activities	3 - 8 hours	No
dog165	Unhealthy	Male	61	3 - 6	39	14	Pure	Intact	No	Less than 30 mins	Normal (BCS 3)	Cooked food	Regularly (daily)	No	joint problems	No	Female	>50 years	I have had a dog before	None	Two people	No	3 - 12 months	Born at my place/bought it	Urban/suburban apartment	4 or more kinds of tasks	more than 3 hours	<10 commands	2 - 3 activities	None	No
dog168	Healthy	Female	17	1 - 3	45	52	Pure	Intact	No	More than 7 hours	Normal (BCS 3)	Raw food	Rarely	No	None	No	Female	30 - 39 years	I have had a dog before	One	Two people	No	7 - 12 weeks	Got as a present	Fenced garden	2 kinds of tasks	>1 - 3 hours	<10 commands	2 - 3 activities	3 - 8 hours	No
dog169	Unhealthy	Male	170	> 12	45	12	Mixed	Intact	Yes	More than 7 hours	Normal (BCS 3)	Mixed	Almost never	Yes	joint problems + tooth problems	Yes	Male	30 - 39 years	I have never had a dog before	None	Three people	Yes	More than a year	Got as a present	Fenced garden	2 kinds of tasks	Less than 30 mins	<10 commands	One activity	More than 8 hours	No
dog170	Unhealthy	Female	158	> 12	20	3	Pure	Neutered	No	Less than 30 mins	Normal (BCS 3)	Tinned and dry food	Often	Yes	other disorders	Yes	Female	<29 years	I have had a dog before	None	Four or more people	No	7 - 12 weeks	Born at my place/bought it	Urban/suburban apartment	Maximum a task	30 mins - 1 hour	<10 commands	2 - 3 activities	1 - 2 hours	Yes
dog171	Healthy	Male	98	8 - 10	50	20	Mixed	Intact	No	>1 - 3 hours	Normal (BCS 3)	Cooked food	Often	Yes	None	No	Female	40 - 49 years	I have had a dog before	One	Three people	No	7 - 12 weeks	Found it/shelter	Urban/suburban apartment	4 or more kinds of tasks	>1 - 3 hours	>30 commands	4 or more activities	1 - 2 hours	No
dog173	Unhealthy	Female	71	3 - 6	53	31	Mixed	Neutered	No	>1 - 3 hours	Over-weight (BCS 4-5)	Raw food	Rarely	No	joint problems + tooth problems	No	Female	40 - 49 years	I have never had a dog before	None	Four or more people	Yes	7 - 12 weeks	Got as a present	Urban/suburban apartment	4 or more kinds of tasks	30 mins - 1 hour	11 - 30 commands	2 - 3 activities	None	No
dog174	Healthy	Male	131	10 - 12	30	9	Pure	Intact	No	>1 - 3 hours	Over-weight (BCS 4-5)	Mixed	Almost never	No	None	No	Female	30 - 39 years	I have had a dog before	None	Two people	No	7 - 12 weeks	Got as a present	Urban/suburban apartment	Maximum a task	30 mins - 1 hour	<10 commands	One activity	3 - 8 hours	No
dog175	Healthy	Female	14	1 - 3	60	22	Mixed	Intact	No	30 mins - 1 hour	Thin (BCS 1-2)	Mixed	Rarely	No	None	No	Female	<29 years	I have never had a dog before	None	Two people	No	Less than 7 weeks	Found it/shelter	Urban/suburban apartment	4 or more kinds of tasks	30 mins - 1 hour	<10 commands	4 or more activities	3 - 8 hours	No
dog176	Healthy	Male	65	3 - 6	85	45	Pure	Intact	No	More than 7 hours	Normal (BCS 3)	Raw food	Rarely	No	None	No	Female	<29 years	I have had a dog before	Two or more	Four or more people	No	7 - 12 weeks	Born at my place/bought it	Fenced garden	2 kinds of tasks	30 mins - 1 hour	<10 commands	2 - 3 activities	More than 8 hours	No
dog177	Healthy	Male	29	1 - 3	28	8	Mixed	Intact	No	Less than 30 mins	Thin (BCS 1-2)	Mixed	Rarely	Yes	None	No	Female	30 - 39 years	I have never had a dog before	None	Two people	No	More than a year	Found it/shelter	Urban/suburban apartment	3 kinds of tasks	>1 - 3 hours	11 - 30 commands	4 or more activities	3 - 8 hours	No
dog178	Unhealthy	Female	169	> 12	52	22	Pure	Neutered	Yes	Less than 30 mins	Thin (BCS 1-2)	Cooked food	Rarely	No	joint problems + tooth problems	No	Female	40 - 49 years	Dogs are my hobby/profession	Two or more	Four or more people	Yes	3 - 12 months	Born at my place/bought it	Urban/suburban apartment	2 kinds of tasks	Less than 30 mins	<10 commands	One activity	3 - 8 hours	Yes
dog179	Unhealthy	Female	139	10 - 12	35	5	Pure	Neutered	No	>1 - 3 hours	Normal (BCS 3)	Tinned and dry food	Rarely	No	tooth problems	No	Female	>50 years	I have never had a dog before	One	One person	No	7 - 12 weeks	Born at my place/bought it	Urban/suburban apartment	4 or more kinds of tasks	more than 3 hours	>30 commands	4 or more activities	1 - 2 hours	No
dog180	Healthy	Female	27	1 - 3	65	45	Pure	Intact	No	>3 - 7 hours	Normal (BCS 3)	Mixed	Often	No	None	No	Male	>50 years	Dogs are my hobby/profession	Two or more	Two people	No	7 - 12 weeks	Born at my place/bought it	Fenced garden	2 kinds of tasks	30 mins - 1 hour	11 - 30 commands	One activity	3 - 8 hours	No
dog181	Healthy	Male	54	3 - 6	45	10	Mixed	Neutered	No	>1 - 3 hours	Normal (BCS 3)	Raw food	Rarely	No	None	No	Female	30 - 39 years	I have never had a dog before	None	Two people	No	Less than 7 weeks	Found it/shelter	Urban/suburban apartment	4 or more kinds of tasks	>1 - 3 hours	11 - 30 commands	2 - 3 activities	3 - 8 hours	No
dog183	Unhealthy	Male	192	> 12	35	22	Mixed	Neutered	No	>1 - 3 hours	Normal (BCS 3)	Raw food	Often	Yes	joint problems	No	Female	30 - 39 years	I have had a dog before	Two or more	Two people	No	Less than 7 weeks	Found it/shelter	Fenced garden	4 or more kinds of tasks	30 mins - 1 hour	11 - 30 commands	4 or more activities	1 - 2 hours	No
dog184	Healthy	Female	17	1 - 3	20	4	Pure	Neutered	No	30 mins - 1 hour	Normal (BCS 3)	Cooked food	Almost never	No	None	No	Female	<29 years	I have never had a dog before	None	Three people	No	7 - 12 weeks	Born at my place/bought it	Urban/suburban apartment	2 kinds of tasks	more than 3 hours	11 - 30 commands	4 or more activities	3 - 8 hours	Yes
dog185	Healthy	Male	18	1 - 3	60	50	Pure	Intact	No	Less than 30 mins	Normal (BCS 3)	Mixed	Rarely	Yes	None	No	Female	<29 years	I have never had a dog before	Two or more	Four or more people	No	7 - 12 weeks	Born at my place/bought it	Fenced garden	3 kinds of tasks	>1 - 3 hours	<10 commands	One activity	3 - 8 hours	Yes
dog186	Unhealthy	Male	77	6 - 8	56	20	Pure	Intact	No	>1 - 3 hours	Normal (BCS 3)	Dry food only	Regularly (daily)	Yes	joint problems	No	Female	30 - 39 years	I have had a dog before	One	Two people	No	7 - 12 weeks	Born at my place/bought it	Urban/suburban apartment	4 or more kinds of tasks	>1 - 3 hours	11 - 30 commands	4 or more activities	3 - 8 hours	Yes
dog187	Unhealthy	Male	96	8 - 10	18	10	Pure	Intact	No	Less than 30 mins	Normal (BCS 3)	Tinned and dry food	Regularly (daily)	Yes	tooth problems	No	Female	30 - 39 years	I have never had a dog before	None	Four or more people	Yes	7 - 12 weeks	Got as a present	Fenced garden	3 kinds of tasks	Less than 30 mins	<10 commands	One activity	1 - 2 hours	No
dog188	Unhealthy	Male	130	10 - 12	60	25	Pure	Intact	No	>1 - 3 hours	Normal (BCS 3)	Dry food only	Regularly (daily)	Yes	joint problems + tooth problems	No	Male	>50 years	Dogs are my hobby/profession	Two or more	Two people	No	7 - 12 weeks	Born at my place/bought it	Urban/suburban apartment	4 or more kinds of tasks	>1 - 3 hours	>30 commands	One activity	None	Yes
dog189	Healthy	Female	60	3 - 6	35	7	Mixed	Neutered	No	>1 - 3 hours	Normal (BCS 3)	Cooked food	Almost never	No	None	No	Female	30 - 39 years	I have had a dog before	One	Two people	No	3 - 12 months	Got as a present	Urban/suburban apartment	4 or more kinds of tasks	>1 - 3 hours	11 - 30 commands	4 or more activities	3 - 8 hours	No
dog190	Unhealthy	Male	182	> 12	20	14	Pure	Intact	Yes	>1 - 3 hours	Normal (BCS 3)	Cooked food	Often	No	joint problems	No	Female	40 - 49 years	I have had a dog before	Two or more	Two people	No	7 - 12 weeks	Got as a present	House with garden/non fenced area	4 or more kinds of tasks	more than 3 hours	11 - 30 commands	One activity	1 - 2 hours	No
dog192	Unhealthy	Female	85	6 - 8	45	16	Mixed	Neutered	No	Less than 30 mins	Normal (BCS 3)	Dry food only	Regularly (daily)	No	tooth problems	No	Female	30 - 39 years	I have had a dog before	None	Two people	No	7 - 12 weeks	Got as a present	Urban/suburban apartment	4 or more kinds of tasks	>1 - 3 hours	11 - 30 commands	2 - 3 activities	More than 8 hours	No
dog193	Unhealthy	Female	88	6 - 8	55	28	Pure	Neutered	No	>1 - 3 hours	Normal (BCS 3)	Cooked food	Regularly (daily)	Yes	joint problems	Yes	Female	>50 years	I have never had a dog before	One	One person	Yes	More than a year	Got as a present	Urban/suburban apartment	4 or more kinds of tasks	>1 - 3 hours	11 - 30 commands	2 - 3 activities	None	No
dog194	Healthy	Female	62	3 - 6	45	20	Mixed	Neutered	No	>3 - 7 hours	Normal (BCS 3)	Mixed	Rarely	Yes	None	No	Female	<29 years	Dogs are my hobby/profession	Two or more	Four or more people	No	More than a year	Found it/shelter	Fenced garden	4 or more kinds of tasks	>1 - 3 hours	11 - 30 commands	2 - 3 activities	3 - 8 hours	No
dog195	Unhealthy	Female	151	> 12	25	16	Pure	Neutered	Yes	>1 - 3 hours	Normal (BCS 3)	Dry food only	Regularly (daily)	Yes	joint problems	Yes	Female	40 - 49 years	I have had a dog before	None	One person	No	7 - 12 weeks	Born at my place/bought it	Urban/suburban apartment	4 or more kinds of tasks	>1 - 3 hours	11 - 30 commands	4 or more activities	3 - 8 hours	Yes
dog196	Unhealthy	Female	127	10 - 12	43	11	Pure	Intact	No	More than 7 hours	Normal (BCS 3)	Dry food only	Rarely	No	tooth problems	No	Female	<29 years	I have had a dog before	Two or more	Two people	No	Less than 7 weeks	Born at my place/bought it	Fenced garden	4 or more kinds of tasks	>1 - 3 hours	>30 commands	4 or more activities	More than 8 hours	Yes
dog198	Healthy	Female	42	3 - 6	60	28	Mixed	Neutered	No	>1 - 3 hours	Normal (BCS 3)	Mixed	Rarely	No	None	Yes	Female	30 - 39 years	I have had a dog before	One	Two people	No	3 - 12 months	Found it/shelter	Urban/suburban apartment	4 or more kinds of tasks	>1 - 3 hours	11 - 30 commands	4 or more activities	3 - 8 hours	No
dog199	Unhealthy	Male	129	10 - 12	33	16	Mixed	Neutered	Yes	>1 - 3 hours	Over-weight (BCS 4-5)	Tinned and dry food	Regularly (daily)	No	joint problems	No	Female	40 - 49 years	I have had a dog before	One	One person	No	7 - 12 weeks	Got as a present	Urban/suburban apartment	4 or more kinds of tasks	>1 - 3 hours	11 - 30 commands	2 - 3 activities	More than 8 hours	Yes
dog200	Healthy	Female	151	> 12	20	10	Mixed	Neutered	No	>1 - 3 hours	Normal (BCS 3)	Raw food	Rarely	No	None	No	Male	>50 years	I have had a dog before	One	Three people	No	Less than 7 weeks	Found it/shelter	Fenced garden	3 kinds of tasks	Less than 30 mins	11 - 30 commands	2 - 3 activities	3 - 8 hours	No
dog201	Unhealthy	Male	145	> 12	50	28	Mixed	Neutered	No	30 mins - 1 hour	Normal (BCS 3)	Cooked food	Regularly (daily)	Yes	joint problems + tooth problems	No	Female	30 - 39 years	Dogs are my hobby/profession	Two or more	Two people	No	More than a year	Found it/shelter	Fenced garden	3 kinds of tasks	Less than 30 mins	<10 commands	One activity	None	Yes
dog202	Unhealthy	Female	69	3 - 6	55	31	Pure	Neutered	No	>1 - 3 hours	Normal (BCS 3)	Cooked food	Regularly (daily)	Yes	joint problems	No	Female	<29 years	Dogs are my hobby/profession	Two or more	Three people	No	7 - 12 weeks	Born at my place/bought it	Fenced garden	4 or more kinds of tasks	30 mins - 1 hour	>30 commands	2 - 3 activities	3 - 8 hours	No
dog203	Unhealthy	Female	134	10 - 12	45	23	Mixed	Neutered	No	>1 - 3 hours	Normal (BCS 3)	Dry food only	Almost never	No	tooth problems	No	Female	<29 years	I have never had a dog before	One	Four or more people	No	7 - 12 weeks	Got as a present	Urban/suburban apartment	2 kinds of tasks	>1 - 3 hours	<10 commands	2 - 3 activities	3 - 8 hours	No
dog205	Healthy	Male	107	8 - 10	50	12	Mixed	Neutered	No	30 mins - 1 hour	Thin (BCS 1-2)	Mixed	Rarely	Yes	None	No	Male	>50 years	I have never had a dog before	One	Four or more people	Yes	3 - 12 months	Found it/shelter	Urban/suburban apartment	4 or more kinds of tasks	>1 - 3 hours	11 - 30 commands	2 - 3 activities	3 - 8 hours	No
dog206	Healthy	Male	21	1 - 3	51	22	Pure	Neutered	No	30 mins - 1 hour	Normal (BCS 3)	Raw food	Regularly (daily)	No	None	No	Female	<29 years	I have had a dog before	One	Two people	No	7 - 12 weeks	Born at my place/bought it	Urban/suburban apartment	3 kinds of tasks	more than 3 hours	11 - 30 commands	2 - 3 activities	3 - 8 hours	Yes
dog207	Healthy	Male	35	1 - 3	53	23	Mixed	Neutered	No	30 mins - 1 hour	Normal (BCS 3)	Raw food	Regularly (daily)	Yes	None	No	Female	<29 years	I have had a dog before	One	Two people	No	More than a year	Found it/shelter	Urban/suburban apartment	4 or more kinds of tasks	more than 3 hours	11 - 30 commands	4 or more activities	3 - 8 hours	No
dog208	Unhealthy	Male	196	> 12	35	7	Pure	Intact	Yes	>1 - 3 hours	Normal (BCS 3)	Mixed	Rarely	No	tooth problems	Yes	Female	<29 years	I have never had a dog before	One	Two people	No	Less than 7 weeks	Got as a present	Urban/suburban apartment	3 kinds of tasks	>1 - 3 hours	<10 commands	2 - 3 activities	1 - 2 hours	Yes
dog209	Healthy	Female	123	10 - 12	48	15	Pure	Neutered	No	>3 - 7 hours	Normal (BCS 3)	Cooked food	Regularly (daily)	No	None	No	Female	30 - 39 years	Dogs are my hobby/profession	Two or more	Two people	No	7 - 12 weeks	Born at my place/bought it	Urban/suburban apartment	4 or more kinds of tasks	>1 - 3 hours	>30 commands	4 or more activities	None	No
dog210	Unhealthy	Male	99	8 - 10	58	24	Mixed	Neutered	No	>1 - 3 hours	Normal (BCS 3)	Mixed	Often	No	joint problems	No	Male	40 - 49 years	I have had a dog before	Two or more	Two people	No	7 - 12 weeks	Found it/shelter	Urban/suburban apartment	4 or more kinds of tasks	more than 3 hours	>30 commands	2 - 3 activities	More than 8 hours	No
dog211	Unhealthy	Female	85	6 - 8	52	18	Pure	Neutered	No	>3 - 7 hours	Normal (BCS 3)	Mixed	Often	Yes	joint problems	No	Male	40 - 49 years	I have had a dog before	Two or more	Two people	No	More than a year	Found it/shelter	Urban/suburban apartment	4 or more kinds of tasks	more than 3 hours	>30 commands	2 - 3 activities	More than 8 hours	No
dog212	Unhealthy	Male	163	> 12	20	10	Mixed	Intact	No	>1 - 3 hours	Normal (BCS 3)	Cooked food	Regularly (daily)	Yes	tooth problems	Yes	Female	40 - 49 years	I have had a dog before	One	Two people	No	3 - 12 months	Found it/shelter	Urban/suburban apartment	4 or more kinds of tasks	>1 - 3 hours	11 - 30 commands	One activity	3 - 8 hours	Yes
dog213	Unhealthy	Female	158	> 12	56	33	Mixed	Neutered	No	30 mins - 1 hour	Normal (BCS 3)	Cooked food	Almost never	Yes	joint problems	No	Male	>50 years	Dogs are my hobby/profession	Two or more	Two people	No	More than a year	Found it/shelter	House with garden/non fenced area	Maximum a task	Less than 30 mins	<10 commands	One activity	More than 8 hours	Yes
dog214	Unhealthy	Male	90	6 - 8	60	26	Pure	Intact	No	30 mins - 1 hour	Normal (BCS 3)	Raw food	Rarely	No	tooth problems	No	Female	<29 years	Dogs are my hobby/profession	Two or more	Four or more people	Yes	Less than 7 weeks	Born at my place/bought it	Fenced garden	4 or more kinds of tasks	>1 - 3 hours	11 - 30 commands	4 or more activities	More than 8 hours	No
dog215	Unhealthy	Male	86	6 - 8	38	12	Pure	Neutered	No	>1 - 3 hours	Normal (BCS 3)	Mixed	Often	No	joint problems	Yes	Female	40 - 49 years	I have had a dog before	Two or more	Two people	No	3 - 12 months	Found it/shelter	Urban/suburban apartment	4 or more kinds of tasks	more than 3 hours	>30 commands	2 - 3 activities	More than 8 hours	No
dog216	Healthy	Male	24	1 - 3	43	19	Pure	Neutered	No	>1 - 3 hours	Thin (BCS 1-2)	Mixed	Rarely	No	None	No	Female	<29 years	I have had a dog before	One	Two people	No	7 - 12 weeks	Born at my place/bought it	House with garden/non fenced area	4 or more kinds of tasks	30 mins - 1 hour	11 - 30 commands	4 or more activities	3 - 8 hours	No
dog218	Healthy	Male	80	6 - 8	62	28	Mixed	Neutered	No	>1 - 3 hours	Normal (BCS 3)	Mixed	Rarely	Yes	None	No	Female	<29 years	Dogs are my hobby/profession	One	Two people	No	7 - 12 weeks	Got as a present	Urban/suburban apartment	4 or more kinds of tasks	>1 - 3 hours	11 - 30 commands	4 or more activities	More than 8 hours	No
dog219	Healthy	Female	20	1 - 3	55	23	Mixed	Neutered	No	More than 7 hours	Normal (BCS 3)	Raw food	Almost never	No	None	No	Female	30 - 39 years	I have never had a dog before	One	Three people	Yes	7 - 12 weeks	Got as a present	Fenced garden	4 or more kinds of tasks	>1 - 3 hours	<10 commands	2 - 3 activities	None	No
dog220	Unhealthy	Male	182	> 12	35	13	Mixed	Intact	No	>3 - 7 hours	Normal (BCS 3)	Dry food only	Regularly (daily)	Yes	joint problems	Yes	Female	>50 years	I have had a dog before	One	Two people	No	7 - 12 weeks	Got as a present	House with garden/non fenced area	Maximum a task	Less than 30 mins	<10 commands	One activity	1 - 2 hours	No
dog221	Healthy	Female	72	6 - 8	25	7	Pure	Intact	No	30 mins - 1 hour	Normal (BCS 3)	Raw food	Rarely	No	None	No	Female	<29 years	I have never had a dog before	One	Two people	No	Less than 7 weeks	Born at my place/bought it	Urban/suburban apartment	4 or more kinds of tasks	>1 - 3 hours	11 - 30 commands	2 - 3 activities	More than 8 hours	No
dog222	Healthy	Female	33	1 - 3	60	25	Mixed	Neutered	No	30 mins - 1 hour	Thin (BCS 1-2)	Tinned and dry food	Almost never	No	None	No	Female	30 - 39 years	I have never had a dog before	None	Two people	No	7 - 12 weeks	Found it/shelter	Urban/suburban apartment	4 or more kinds of tasks	>1 - 3 hours	11 - 30 commands	4 or more activities	1 - 2 hours	No
dog223	Unhealthy	Male	198	> 12	50	33	Mixed	Neutered	Yes	More than 7 hours	Normal (BCS 3)	Raw food	Regularly (daily)	No	joint problems + tooth problems	Yes	Female	40 - 49 years	Dogs are my hobby/profession	Two or more	Two people	No	7 - 12 weeks	Found it/shelter	Fenced garden	Maximum a task	Less than 30 mins	<10 commands	One activity	More than 8 hours	No
dog224	Unhealthy	Female	28	1 - 3	51	28	Pure	Neutered	No	30 mins - 1 hour	Normal (BCS 3)	Raw food	Often	No	joint problems	No	Female	<29 years	I have had a dog before	Two or more	Four or more people	No	7 - 12 weeks	Born at my place/bought it	Urban/suburban apartment	4 or more kinds of tasks	>1 - 3 hours	11 - 30 commands	4 or more activities	3 - 8 hours	No
dog225	Healthy	Male	109	8 - 10	53	20	Pure	Intact	No	>1 - 3 hours	Normal (BCS 3)	Dry food only	Rarely	No	None	No	Female	30 - 39 years	Dogs are my hobby/profession	One	Two people	No	7 - 12 weeks	Born at my place/bought it	Urban/suburban apartment	4 or more kinds of tasks	30 mins - 1 hour	11 - 30 commands	4 or more activities	3 - 8 hours	Yes
dog226	Healthy	Female	72	6 - 8	35	9	Mixed	Neutered	No	30 mins - 1 hour	Normal (BCS 3)	Raw food	Rarely	Yes	None	No	Male	30 - 39 years	I have never had a dog before	One	Two people	No	More than a year	Found it/shelter	Urban/suburban apartment	4 or more kinds of tasks	>1 - 3 hours	<10 commands	4 or more activities	More than 8 hours	Yes
dog227	Unhealthy	Female	30	1 - 3	29	4	Pure	Intact	No	>1 - 3 hours	Normal (BCS 3)	Dry food only	Regularly (daily)	Yes	joint problems	No	Female	<29 years	Dogs are my hobby/profession	Two or more	One person	No	7 - 12 weeks	Born at my place/bought it	Urban/suburban apartment	4 or more kinds of tasks	>1 - 3 hours	>30 commands	4 or more activities	1 - 2 hours	No
dog228	Unhealthy	Male	173	> 12	30	10	Pure	Intact	Yes	>1 - 3 hours	Thin (BCS 1-2)	Raw food	Often	No	joint problems + tooth problems	No	Female	<29 years	I have had a dog before	One	Three people	Yes	7 - 12 weeks	Born at my place/bought it	Urban/suburban apartment	Maximum a task	Less than 30 mins	<10 commands	One activity	3 - 8 hours	No
dog229	Unhealthy	Female	139	10 - 12	25	8	Mixed	Intact	No	More than 7 hours	Normal (BCS 3)	Mixed	Almost never	No	other disorders	No	Male	30 - 39 years	I have had a dog before	None	One person	No	Less than 7 weeks	Got as a present	Fenced garden	Maximum a task	Less than 30 mins	<10 commands	One activity	3 - 8 hours	No
dog231	Unhealthy	Male	84	6 - 8	44	23	Pure	Intact	No	30 mins - 1 hour	Normal (BCS 3)	Tinned and dry food	Regularly (daily)	No	other disorders	Yes	Female	<29 years	I have never had a dog before	None	Four or more people	No	7 - 12 weeks	Born at my place/bought it	Urban/suburban apartment	4 or more kinds of tasks	>1 - 3 hours	11 - 30 commands	4 or more activities	3 - 8 hours	No
dog232	Healthy	Male	36	3 - 6	50	20	Pure	Neutered	No	More than 7 hours	Normal (BCS 3)	Raw food	Rarely	No	None	No	Female	<29 years	I have had a dog before	One	Three people	Yes	7 - 12 weeks	Born at my place/bought it	Urban/suburban apartment	4 or more kinds of tasks	>1 - 3 hours	11 - 30 commands	4 or more activities	3 - 8 hours	No
dog233	Unhealthy	Male	34	1 - 3	20	6	Pure	Intact	No	>1 - 3 hours	Normal (BCS 3)	Mixed	Rarely	No	joint problems	Yes	Female	<29 years	I have had a dog before	One	Two people	No	Less than 7 weeks	Born at my place/bought it	Urban/suburban apartment	4 or more kinds of tasks	>1 - 3 hours	11 - 30 commands	4 or more activities	1 - 2 hours	No
dog234	Unhealthy	Male	67	3 - 6	35	8	Pure	Intact	No	More than 7 hours	Thin (BCS 1-2)	Raw food	Rarely	No	joint problems	No	Female	30 - 39 years	I have had a dog before	None	Three people	Yes	7 - 12 weeks	Born at my place/bought it	Fenced garden	4 or more kinds of tasks	Less than 30 mins	11 - 30 commands	2 - 3 activities	More than 8 hours	No
dog235	Unhealthy	Female	84	6 - 8	37	10	Pure	Neutered	No	>1 - 3 hours	Normal (BCS 3)	Dry food only	Rarely	No	tooth problems	No	Female	30 - 39 years	I have never had a dog before	One	Two people	No	Less than 7 weeks	Born at my place/bought it	Urban/suburban apartment	4 or more kinds of tasks	30 mins - 1 hour	11 - 30 commands	4 or more activities	1 - 2 hours	No
dog237	Unhealthy	Male	50	3 - 6	23	6	Pure	Intact	No	30 mins - 1 hour	Normal (BCS 3)	Raw food	Rarely	Yes	tooth problems	No	Female	<29 years	I have never had a dog before	None	Three people	No	3 - 12 months	Born at my place/bought it	Urban/suburban apartment	3 kinds of tasks	more than 3 hours	11 - 30 commands	2 - 3 activities	1 - 2 hours	No
dog238	Healthy	Male	30	1 - 3	25	5	Pure	Neutered	No	>3 - 7 hours	Normal (BCS 3)	Mixed	Rarely	Yes	None	No	Female	40 - 49 years	I have had a dog before	Two or more	Four or more people	Yes	7 - 12 weeks	Born at my place/bought it	Fenced garden	3 kinds of tasks	>1 - 3 hours	<10 commands	2 - 3 activities	1 - 2 hours	No
dog239	Healthy	Male	21	1 - 3	60	20	Pure	Intact	No	30 mins - 1 hour	Thin (BCS 1-2)	Dry food only	Often	No	None	No	Female	<29 years	I have had a dog before	None	Two people	No	7 - 12 weeks	Born at my place/bought it	House with garden/non fenced area	3 kinds of tasks	>1 - 3 hours	11 - 30 commands	4 or more activities	3 - 8 hours	No
dog240	Unhealthy	Female	29	1 - 3	58	32	Pure	Intact	No	More than 7 hours	Normal (BCS 3)	Raw food	Regularly (daily)	No	joint problems + tooth problems	Yes	Male	>50 years	I have had a dog before	One	Two people	No	3 - 12 months	Got as a present	Fenced garden	4 or more kinds of tasks	>1 - 3 hours	11 - 30 commands	4 or more activities	3 - 8 hours	No
dog241	Unhealthy	Male	144	> 12	30	14	Pure	Intact	Yes	>1 - 3 hours	Over-weight (BCS 4-5)	Cooked food	Often	Yes	None	No	Female	<29 years	I have had a dog before	One	Four or more people	No	7 - 12 weeks	Born at my place/bought it	Urban/suburban apartment	4 or more kinds of tasks	>1 - 3 hours	<10 commands	One activity	1 - 2 hours	No
dog242	Healthy	Male	116	8 - 10	53	23	Pure	Intact	No	More than 7 hours	Normal (BCS 3)	Dry food only	Rarely	No	None	No	Female	<29 years	Dogs are my hobby/profession	Two or more	Three people	No	7 - 12 weeks	Born at my place/bought it	Fenced garden	3 kinds of tasks	Less than 30 mins	11 - 30 commands	One activity	3 - 8 hours	No
dog243	Healthy	Male	16	1 - 3	65	35	Pure	Intact	No	>1 - 3 hours	Thin (BCS 1-2)	Raw food	Regularly (daily)	No	None	No	Male	40 - 49 years	I have had a dog before	One	One person	No	7 - 12 weeks	Born at my place/bought it	Urban/suburban apartment	4 or more kinds of tasks	>1 - 3 hours	>30 commands	4 or more activities	3 - 8 hours	No
dog244	Unhealthy	Male	36	3 - 6	58	24	Pure	Intact	No	More than 7 hours	Normal (BCS 3)	Tinned and dry food	Almost never	No	joint problems	Yes	Female	30 - 39 years	Dogs are my hobby/profession	Two or more	Two people	No	3 - 12 months	Born at my place/bought it	Urban/suburban apartment	4 or more kinds of tasks	>1 - 3 hours	11 - 30 commands	2 - 3 activities	3 - 8 hours	No
dog245	Unhealthy	Male	181	> 12	50	20	Pure	Intact	Yes	>1 - 3 hours	Normal (BCS 3)	Mixed	Rarely	Yes	tooth problems	No	Female	30 - 39 years	I have had a dog before	None	One person	No	3 - 12 months	Got as a present	House with garden/non fenced area	4 or more kinds of tasks	30 mins - 1 hour	>30 commands	2 - 3 activities	3 - 8 hours	No
dog246	Unhealthy	Female	80	6 - 8	60	35	Mixed	Neutered	No	More than 7 hours	Normal (BCS 3)	Mixed	Almost never	Yes	other disorders	Yes	Female	30 - 39 years	Dogs are my hobby/profession	One	One person	No	More than a year	Found it/shelter	Fenced garden	4 or more kinds of tasks	>1 - 3 hours	11 - 30 commands	One activity	More than 8 hours	No
dog247	Unhealthy	Female	68	3 - 6	55	30	Pure	Neutered	No	>3 - 7 hours	Normal (BCS 3)	Dry food only	Rarely	No	joint problems	No	Female	>50 years	I have never had a dog before	None	Two people	No	Less than 7 weeks	Got as a present	Urban/suburban apartment	4 or more kinds of tasks	more than 3 hours	>30 commands	4 or more activities	None	No
dog248	Unhealthy	Female	124	10 - 12	30	10	Pure	Neutered	No	Less than 30 mins	Normal (BCS 3)	Cooked food	Rarely	Yes	tooth problems	No	Female	<29 years	I have never had a dog before	None	Two people	No	More than a year	Found it/shelter	Urban/suburban apartment	4 or more kinds of tasks	Less than 30 mins	<10 commands	One activity	1 - 2 hours	No
dog249	Unhealthy	Female	121	10 - 12	30	9	Pure	Neutered	Yes	Less than 30 mins	Normal (BCS 3)	Dry food only	Regularly (daily)	No	None	No	Female	<29 years	Dogs are my hobby/profession	Two or more	Four or more people	No	3 - 12 months	Found it/shelter	Urban/suburban apartment	3 kinds of tasks	30 mins - 1 hour	<10 commands	4 or more activities	3 - 8 hours	No
dog250	Unhealthy	Male	55	3 - 6	36	7	Mixed	Neutered	No	>1 - 3 hours	Normal (BCS 3)	Raw food	Often	Yes	joint problems	No	Female	40 - 49 years	I have had a dog before	One	Three people	No	3 - 12 months	Found it/shelter	Urban/suburban apartment	4 or more kinds of tasks	>1 - 3 hours	11 - 30 commands	4 or more activities	3 - 8 hours	No
dog251	Unhealthy	Female	86	6 - 8	50	20	Mixed	Neutered	No	More than 7 hours	Normal (BCS 3)	Cooked food	Almost never	No	tooth problems	Yes	Female	30 - 39 years	I have had a dog before	One	Three people	No	7 - 12 weeks	Born at my place/bought it	Fenced garden	2 kinds of tasks	30 mins - 1 hour	<10 commands	One activity	None	No
dog252	Unhealthy	Male	100	8 - 10	40	17	Pure	Intact	Yes	>3 - 7 hours	Over-weight (BCS 4-5)	Mixed	Rarely	Yes	other disorders	No	Female	30 - 39 years	I have had a dog before	None	Four or more people	Yes	7 - 12 weeks	Got as a present	Fenced garden	2 kinds of tasks	30 mins - 1 hour	<10 commands	One activity	3 - 8 hours	No
dog253	Unhealthy	Male	72	6 - 8	60	20	Mixed	Neutered	No	More than 7 hours	Normal (BCS 3)	Mixed	Almost never	No	joint problems	No	Female	30 - 39 years	I have had a dog before	One	Three people	No	7 - 12 weeks	Born at my place/bought it	Fenced garden	4 or more kinds of tasks	Less than 30 mins	<10 commands	One activity	More than 8 hours	No
dog254	Unhealthy	Female	77	6 - 8	40	15	Pure	Neutered	No	More than 7 hours	Thin (BCS 1-2)	Mixed	Rarely	No	other disorders	No	Male	30 - 39 years	Dogs are my hobby/profession	Two or more	Two people	No	7 - 12 weeks	Born at my place/bought it	Fenced garden	2 kinds of tasks	30 mins - 1 hour	<10 commands	One activity	3 - 8 hours	No
dog255	Unhealthy	Male	123	10 - 12	35	29	Pure	Intact	Yes	30 mins - 1 hour	Over-weight (BCS 4-5)	Mixed	Rarely	Yes	joint problems	No	Female	<29 years	I have had a dog before	None	Two people	No	Less than 7 weeks	Born at my place/bought it	Urban/suburban apartment	Maximum a task	Less than 30 mins	<10 commands	One activity	None	No
dog256	Unhealthy	Female	50	3 - 6	55	34	Pure	Neutered	No	>3 - 7 hours	Normal (BCS 3)	Cooked food	Rarely	Yes	joint problems	No	Female	30 - 39 years	I have had a dog before	One	Two people	No	More than a year	Found it/shelter	Urban/suburban apartment	4 or more kinds of tasks	30 mins - 1 hour	11 - 30 commands	4 or more activities	3 - 8 hours	No
dog257	Unhealthy	Female	92	6 - 8	30	5	Mixed	Neutered	No	Less than 30 mins	Thin (BCS 1-2)	Dry food only	Regularly (daily)	Yes	joint problems + tooth problems	Yes	Female	40 - 49 years	Dogs are my hobby/profession	Two or more	Two people	No	3 - 12 months	Born at my place/bought it	Urban/suburban apartment	3 kinds of tasks	>1 - 3 hours	<10 commands	2 - 3 activities	3 - 8 hours	No
dog259	Unhealthy	Male	78	6 - 8	27	5	Pure	Intact	No	>1 - 3 hours	Normal (BCS 3)	Cooked food	Almost never	Yes	joint problems + tooth problems	No	Female	40 - 49 years	I have never had a dog before	One	Four or more people	Yes	3 - 12 months	Born at my place/bought it	Urban/suburban apartment	Maximum a task	>1 - 3 hours	11 - 30 commands	One activity	1 - 2 hours	No
dog260	Healthy	Male	38	3 - 6	55	40	Pure	Intact	No	>1 - 3 hours	Over-weight (BCS 4-5)	Mixed	Almost never	No	None	No	Female	40 - 49 years	I have never had a dog before	None	Three people	Yes	7 - 12 weeks	Born at my place/bought it	Urban/suburban apartment	3 kinds of tasks	30 mins - 1 hour	<10 commands	2 - 3 activities	1 - 2 hours	No
dog261	Healthy	Male	46	3 - 6	40	18	Mixed	Neutered	No	>3 - 7 hours	Over-weight (BCS 4-5)	Raw food	Almost never	Yes	None	No	Female	>50 years	Dogs are my hobby/profession	Two or more	Three people	Yes	7 - 12 weeks	Born at my place/bought it	Urban/suburban apartment	4 or more kinds of tasks	more than 3 hours	11 - 30 commands	2 - 3 activities	3 - 8 hours	No
dog262	Unhealthy	Female	76	6 - 8	20	4	Mixed	Neutered	No	30 mins - 1 hour	Thin (BCS 1-2)	Raw food	Rarely	Yes	tooth problems	No	Female	<29 years	I have had a dog before	None	Two people	No	More than a year	Got as a present	Urban/suburban apartment	4 or more kinds of tasks	>1 - 3 hours	11 - 30 commands	4 or more activities	More than 8 hours	No
dog263	Unhealthy	Male	138	10 - 12	60	65	Pure	Intact	No	More than 7 hours	Normal (BCS 3)	Dry food only	Regularly (daily)	No	joint problems	Yes	Female	>50 years	I have never had a dog before	Two or more	Two people	No	Less than 7 weeks	Born at my place/bought it	Fenced garden	Maximum a task	more than 3 hours	11 - 30 commands	One activity	1 - 2 hours	No
dog264	Unhealthy	Female	39	3 - 6	53	28	Pure	Neutered	No	More than 7 hours	Normal (BCS 3)	Raw food	Rarely	No	other disorders	No	Female	>50 years	I have had a dog before	None	Two people	No	7 - 12 weeks	Born at my place/bought it	Urban/suburban apartment	4 or more kinds of tasks	>1 - 3 hours	>30 commands	4 or more activities	3 - 8 hours	No
dog265	Unhealthy	Male	93	6 - 8	60	35	Mixed	Neutered	No	>1 - 3 hours	Over-weight (BCS 4-5)	Raw food	Regularly (daily)	No	other disorders	Yes	Female	30 - 39 years	I have never had a dog before	One	Two people	No	Less than 7 weeks	Got as a present	Urban/suburban apartment	4 or more kinds of tasks	>1 - 3 hours	>30 commands	2 - 3 activities	1 - 2 hours	No
dog266	Unhealthy	Male	79	6 - 8	65	27	Mixed	Neutered	No	>1 - 3 hours	Thin (BCS 1-2)	Dry food only	Often	Yes	other disorders	No	Female	30 - 39 years	Dogs are my hobby/profession	One	Two people	No	7 - 12 weeks	Got as a present	Urban/suburban apartment	4 or more kinds of tasks	more than 3 hours	>30 commands	4 or more activities	1 - 2 hours	No
dog268	Unhealthy	Female	54	3 - 6	30	6	Mixed	Neutered	No	>1 - 3 hours	Thin (BCS 1-2)	Cooked food	Often	Yes	other disorders	No	Female	30 - 39 years	Dogs are my hobby/profession	One	Two people	No	More than a year	Found it/shelter	Urban/suburban apartment	3 kinds of tasks	more than 3 hours	11 - 30 commands	4 or more activities	1 - 2 hours	No
dog269	Unhealthy	Female	65	3 - 6	35	7	Mixed	Neutered	No	Less than 30 mins	Thin (BCS 1-2)	Dry food only	Rarely	Yes	other disorders	No	Female	30 - 39 years	I have never had a dog before	None	One person	No	3 - 12 months	Found it/shelter	Urban/suburban apartment	4 or more kinds of tasks	30 mins - 1 hour	11 - 30 commands	4 or more activities	1 - 2 hours	No
dog270	Unhealthy	Male	24	1 - 3	45	32	Pure	Intact	No	30 mins - 1 hour	Normal (BCS 3)	Cooked food	Often	Yes	tooth problems	No	Female	30 - 39 years	Dogs are my hobby/profession	Two or more	Three people	Yes	7 - 12 weeks	Born at my place/bought it	Fenced garden	4 or more kinds of tasks	>1 - 3 hours	11 - 30 commands	4 or more activities	1 - 2 hours	No
dog271	Unhealthy	Female	100	8 - 10	55	27	Mixed	Neutered	Yes	>1 - 3 hours	Normal (BCS 3)	Tinned and dry food	Regularly (daily)	Yes	other disorders	No	Female	<29 years	Dogs are my hobby/profession	One	Two people	No	3 - 12 months	Found it/shelter	Urban/suburban apartment	4 or more kinds of tasks	>1 - 3 hours	11 - 30 commands	2 - 3 activities	3 - 8 hours	No
dog272	Unhealthy	Female	90	6 - 8	73	28	Pure	Intact	No	30 mins - 1 hour	Thin (BCS 1-2)	Cooked food	Regularly (daily)	No	joint problems + tooth problems	No	Female	<29 years	Dogs are my hobby/profession	Two or more	Two people	No	7 - 12 weeks	Born at my place/bought it	House with garden/non fenced area	2 kinds of tasks	more than 3 hours	<10 commands	2 - 3 activities	3 - 8 hours	No
dog273	Unhealthy	Female	87	6 - 8	45	30	Pure	Neutered	No	30 mins - 1 hour	Normal (BCS 3)	Cooked food	Often	No	tooth problems	Yes	Female	30 - 39 years	I have had a dog before	Two or more	Three people	Yes	7 - 12 weeks	Born at my place/bought it	House with garden/non fenced area	4 or more kinds of tasks	>1 - 3 hours	11 - 30 commands	4 or more activities	1 - 2 hours	No
dog274	Unhealthy	Male	137	10 - 12	40	19	Mixed	Intact	No	Less than 30 mins	Normal (BCS 3)	Dry food only	Almost never	No	tooth problems	No	Female	>50 years	I have had a dog before	Two or more	One person	No	7 - 12 weeks	Found it/shelter	Urban/suburban apartment	4 or more kinds of tasks	Less than 30 mins	<10 commands	One activity	3 - 8 hours	No
dog275	Healthy	Female	81	6 - 8	45	30	Pure	Neutered	No	30 mins - 1 hour	Normal (BCS 3)	Cooked food	Often	No	None	No	Female	30 - 39 years	I have had a dog before	Two or more	Three people	Yes	7 - 12 weeks	Born at my place/bought it	House with garden/non fenced area	4 or more kinds of tasks	>1 - 3 hours	11 - 30 commands	4 or more activities	1 - 2 hours	No
dog276	Healthy	Female	24	1 - 3	25	5	Pure	Neutered	No	30 mins - 1 hour	Thin (BCS 1-2)	Cooked food	Regularly (daily)	No	None	No	Female	30 - 39 years	I have had a dog before	None	Two people	No	3 - 12 months	Born at my place/bought it	Urban/suburban apartment	3 kinds of tasks	>1 - 3 hours	11 - 30 commands	2 - 3 activities	3 - 8 hours	No
dog277	Unhealthy	Male	64	3 - 6	70	45	Mixed	Intact	No	More than 7 hours	Normal (BCS 3)	Raw food	Rarely	No	other disorders	No	Female	30 - 39 years	Dogs are my hobby/profession	Two or more	Four or more people	No	Less than 7 weeks	Found it/shelter	Fenced garden	4 or more kinds of tasks	30 mins - 1 hour	11 - 30 commands	One activity	3 - 8 hours	No
dog278	Healthy	Female	28	1 - 3	60	19	Mixed	Neutered	No	>1 - 3 hours	Normal (BCS 3)	Dry food only	Almost never	Yes	None	No	Female	<29 years	Dogs are my hobby/profession	None	Two people	No	3 - 12 months	Found it/shelter	Urban/suburban apartment	4 or more kinds of tasks	>1 - 3 hours	11 - 30 commands	4 or more activities	3 - 8 hours	No
dog279	Unhealthy	Male	168	> 12	23	8	Pure	Neutered	No	>1 - 3 hours	Normal (BCS 3)	Dry food only	Rarely	No	joint problems + tooth problems	No	Female	<29 years	Dogs are my hobby/profession	None	Two people	No	Less than 7 weeks	Born at my place/bought it	Urban/suburban apartment	4 or more kinds of tasks	30 mins - 1 hour	<10 commands	2 - 3 activities	1 - 2 hours	Yes
dog280	Unhealthy	Male	123	10 - 12	60	35	Pure	Intact	No	>3 - 7 hours	Normal (BCS 3)	Dry food only	Regularly (daily)	No	other disorders	No	Female	30 - 39 years	Dogs are my hobby/profession	One	Three people	Yes	3 - 12 months	Born at my place/bought it	Fenced garden	4 or more kinds of tasks	30 mins - 1 hour	11 - 30 commands	2 - 3 activities	3 - 8 hours	No
dog282	Healthy	Female	130	10 - 12	55	42	Mixed	Neutered	No	More than 7 hours	Over-weight (BCS 4-5)	Mixed	Often	Yes	None	No	Female	>50 years	I have had a dog before	One	Two people	No	3 - 12 months	Found it/shelter	Urban/suburban apartment	2 kinds of tasks	Less than 30 mins	<10 commands	One activity	More than 8 hours	Yes
dog283	Healthy	Female	99	8 - 10	80	50	Pure	Neutered	No	More than 7 hours	Thin (BCS 1-2)	Tinned and dry food	Rarely	No	None	No	Female	40 - 49 years	I have never had a dog before	One	Three people	Yes	7 - 12 weeks	Got as a present	Fenced garden	Maximum a task	Less than 30 mins	<10 commands	One activity	1 - 2 hours	No
dog284	Unhealthy	Male	92	6 - 8	42	11	Pure	Neutered	No	30 mins - 1 hour	Normal (BCS 3)	Cooked food	Regularly (daily)	No	joint problems + tooth problems	No	Female	<29 years	I have never had a dog before	None	Four or more people	No	7 - 12 weeks	Born at my place/bought it	Urban/suburban apartment	4 or more kinds of tasks	>1 - 3 hours	11 - 30 commands	4 or more activities	None	Yes
dog285	Unhealthy	Male	47	3 - 6	15	5	Pure	Neutered	No	30 mins - 1 hour	Normal (BCS 3)	Mixed	Almost never	No	joint problems	No	Female	>50 years	I have never had a dog before	None	One person	No	3 - 12 months	Born at my place/bought it	Urban/suburban apartment	2 kinds of tasks	>1 - 3 hours	<10 commands	One activity	None	No
dog286	Healthy	Female	37	3 - 6	47	19	Mixed	Neutered	No	>3 - 7 hours	Thin (BCS 1-2)	Dry food only	Rarely	No	None	No	Female	40 - 49 years	Dogs are my hobby/profession	Two or more	Two people	No	7 - 12 weeks	Found it/shelter	House with garden/non fenced area	4 or more kinds of tasks	30 mins - 1 hour	>30 commands	2 - 3 activities	3 - 8 hours	No
dog287	Unhealthy	Female	29	1 - 3	50	45	Pure	Neutered	No	>1 - 3 hours	Normal (BCS 3)	Raw food	Regularly (daily)	No	joint problems	No	Female	<29 years	Dogs are my hobby/profession	Two or more	Two people	No	7 - 12 weeks	Found it/shelter	Fenced garden	3 kinds of tasks	>1 - 3 hours	>30 commands	4 or more activities	1 - 2 hours	No
dog288	Healthy	Male	32	1 - 3	30	7	Pure	Intact	No	>3 - 7 hours	Normal (BCS 3)	Raw food	Almost never	Yes	None	No	Female	>50 years	I have never had a dog before	One	One person	No	Less than 7 weeks	Born at my place/bought it	Urban/suburban apartment	3 kinds of tasks	more than 3 hours	<10 commands	2 - 3 activities	3 - 8 hours	Yes
dog289	Healthy	Female	65	3 - 6	35	8	Pure	Neutered	No	30 mins - 1 hour	Normal (BCS 3)	Cooked food	Often	Yes	None	No	Female	>50 years	I have had a dog before	None	Three people	No	7 - 12 weeks	Born at my place/bought it	Fenced garden	3 kinds of tasks	more than 3 hours	<10 commands	2 - 3 activities	None	No
dog290	Unhealthy	Female	176	> 12	60	23	Pure	Neutered	Yes	30 mins - 1 hour	Over-weight (BCS 4-5)	Dry food only	Almost never	No	tooth problems	Yes	Female	30 - 39 years	Dogs are my hobby/profession	One	Three people	No	7 - 12 weeks	Born at my place/bought it	Urban/suburban apartment	4 or more kinds of tasks	Less than 30 mins	11 - 30 commands	One activity	3 - 8 hours	No
dog291	Healthy	Female	60	3 - 6	30	14	Pure	Neutered	No	>1 - 3 hours	Normal (BCS 3)	Raw food	Almost never	No	None	No	Female	>50 years	I have had a dog before	None	Two people	No	7 - 12 weeks	Born at my place/bought it	Urban/suburban apartment	3 kinds of tasks	30 mins - 1 hour	11 - 30 commands	2 - 3 activities	3 - 8 hours	No
dog292	Unhealthy	Female	170	> 12	30	15	Mixed	Neutered	No	>1 - 3 hours	Normal (BCS 3)	Raw food	Often	No	tooth problems	No	Female	40 - 49 years	I have never had a dog before	One	One person	No	7 - 12 weeks	Found it/shelter	Fenced garden	3 kinds of tasks	30 mins - 1 hour	<10 commands	One activity	More than 8 hours	No
dog293	Unhealthy	Female	137	10 - 12	50	11	Mixed	Neutered	No	30 mins - 1 hour	Thin (BCS 1-2)	Tinned and dry food	Rarely	No	tooth problems	No	Female	>50 years	I have had a dog before	One	One person	No	7 - 12 weeks	Got as a present	Urban/suburban apartment	4 or more kinds of tasks	>1 - 3 hours	<10 commands	2 - 3 activities	3 - 8 hours	Yes
dog294	Healthy	Female	148	> 12	50	27	Mixed	Neutered	No	More than 7 hours	Thin (BCS 1-2)	Raw food	Often	No	None	No	Female	40 - 49 years	I have had a dog before	One	One person	No	Less than 7 weeks	Born at my place/bought it	Fenced garden	2 kinds of tasks	30 mins - 1 hour	<10 commands	One activity	More than 8 hours	No
dog296	Healthy	Female	15	1 - 3	25	5	Pure	Intact	No	>1 - 3 hours	Normal (BCS 3)	Raw food	Almost never	No	None	No	Female	<29 years	Dogs are my hobby/profession	One	Two people	No	7 - 12 weeks	Born at my place/bought it	Urban/suburban apartment	3 kinds of tasks	>1 - 3 hours	<10 commands	4 or more activities	3 - 8 hours	No
dog297	Healthy	Female	98	8 - 10	61	22	Pure	Intact	No	>1 - 3 hours	Normal (BCS 3)	Dry food only	Almost never	No	None	No	Female	30 - 39 years	Dogs are my hobby/profession	Two or more	One person	No	Less than 7 weeks	Born at my place/bought it	Urban/suburban apartment	3 kinds of tasks	30 mins - 1 hour	11 - 30 commands	One activity	3 - 8 hours	No
dog298	Unhealthy	Female	93	6 - 8	34	7	Mixed	Neutered	No	>1 - 3 hours	Thin (BCS 1-2)	Mixed	Rarely	No	joint problems + tooth problems	No	Female	>50 years	I have had a dog before	None	Two people	No	Less than 7 weeks	Got as a present	Urban/suburban apartment	4 or more kinds of tasks	>1 - 3 hours	11 - 30 commands	4 or more activities	3 - 8 hours	No
dog299	Healthy	Female	13	1 - 3	54	22	Pure	Intact	No	30 mins - 1 hour	Normal (BCS 3)	Mixed	Rarely	No	None	No	Female	>50 years	Dogs are my hobby/profession	Two or more	Two people	No	Less than 7 weeks	Born at my place/bought it	Fenced garden	3 kinds of tasks	>1 - 3 hours	11 - 30 commands	2 - 3 activities	None	No
dog300	Unhealthy	Female	130	10 - 12	52	30	Pure	Intact	No	>3 - 7 hours	Normal (BCS 3)	Cooked food	Almost never	Yes	tooth problems	No	Female	40 - 49 years	I have had a dog before	None	Two people	No	More than a year	Got as a present	Fenced garden	3 kinds of tasks	Less than 30 mins	<10 commands	2 - 3 activities	More than 8 hours	No
dog301	Unhealthy	Male	50	3 - 6	30	10	Pure	Intact	No	>3 - 7 hours	Normal (BCS 3)	Mixed	Rarely	No	other disorders	No	Female	30 - 39 years	I have never had a dog before	None	Three people	No	7 - 12 weeks	Born at my place/bought it	Urban/suburban apartment	3 kinds of tasks	>1 - 3 hours	11 - 30 commands	4 or more activities	3 - 8 hours	No
dog302	Unhealthy	Male	72	6 - 8	65	48	Pure	Intact	No	30 mins - 1 hour	Over-weight (BCS 4-5)	Cooked food	Regularly (daily)	Yes	tooth problems	No	Female	30 - 39 years	I have had a dog before	Two or more	Two people	Yes	7 - 12 weeks	Born at my place/bought it	Urban/suburban apartment	4 or more kinds of tasks	>1 - 3 hours	>30 commands	4 or more activities	3 - 8 hours	No
dog303	Healthy	Female	113	8 - 10	50	18	Mixed	Neutered	No	More than 7 hours	Over-weight (BCS 4-5)	Raw food	Almost never	Yes	None	No	Female	<29 years	I have had a dog before	One	Four or more people	Yes	3 - 12 months	Got as a present	Fenced garden	4 or more kinds of tasks	30 mins - 1 hour	<10 commands	One activity	1 - 2 hours	No
dog305	Unhealthy	Female	90	6 - 8	71	36	Pure	Neutered	No	>1 - 3 hours	Normal (BCS 3)	Dry food only	Rarely	No	other disorders	No	Female	30 - 39 years	I have had a dog before	Two or more	One person	No	7 - 12 weeks	Born at my place/bought it	Urban/suburban apartment	4 or more kinds of tasks	more than 3 hours	11 - 30 commands	2 - 3 activities	3 - 8 hours	No
dog306	Unhealthy	Female	170	> 12	25	7	Pure	Neutered	Yes	30 mins - 1 hour	Normal (BCS 3)	Dry food only	Regularly (daily)	Yes	tooth problems	No	Female	>50 years	I have never had a dog before	None	Three people	Yes	Less than 7 weeks	Born at my place/bought it	Urban/suburban apartment	2 kinds of tasks	30 mins - 1 hour	<10 commands	One activity	3 - 8 hours	Yes
dog308	Unhealthy	Female	141	10 - 12	45	35	Pure	Neutered	No	Less than 30 mins	Over-weight (BCS 4-5)	Dry food only	Almost never	Yes	joint problems	Yes	Female	>50 years	I have had a dog before	None	One person	No	3 - 12 months	Got as a present	Fenced garden	Maximum a task	30 mins - 1 hour	<10 commands	One activity	More than 8 hours	No
dog311	Healthy	Female	27	1 - 3	60	22	Pure	Neutered	No	>3 - 7 hours	Thin (BCS 1-2)	Raw food	Rarely	Yes	None	No	Male	30 - 39 years	I have never had a dog before	None	Three people	Yes	7 - 12 weeks	Born at my place/bought it	Urban/suburban apartment	4 or more kinds of tasks	more than 3 hours	<10 commands	4 or more activities	3 - 8 hours	Yes
dog312	Healthy	Female	88	6 - 8	25	5	Pure	Neutered	No	More than 7 hours	Normal (BCS 3)	Dry food only	Almost never	No	None	No	Female	<29 years	I have had a dog before	One	Three people	No	7 - 12 weeks	Born at my place/bought it	Fenced garden	2 kinds of tasks	Less than 30 mins	<10 commands	One activity	None	No
dog313	Healthy	Female	77	6 - 8	60	35	Pure	Intact	No	>1 - 3 hours	Over-weight (BCS 4-5)	Cooked food	Regularly (daily)	No	None	No	Male	40 - 49 years	I have had a dog before	One	Two people	No	7 - 12 weeks	Born at my place/bought it	Urban/suburban apartment	4 or more kinds of tasks	more than 3 hours	11 - 30 commands	2 - 3 activities	1 - 2 hours	No
dog315	Healthy	Female	27	1 - 3	60	22	Pure	Neutered	No	>3 - 7 hours	Normal (BCS 3)	Raw food	Rarely	Yes	None	No	Male	30 - 39 years	I have never had a dog before	None	Three people	Yes	7 - 12 weeks	Born at my place/bought it	Urban/suburban apartment	4 or more kinds of tasks	more than 3 hours	<10 commands	2 - 3 activities	3 - 8 hours	Yes
dog316	Healthy	Female	122	10 - 12	65	24	Pure	Neutered	No	30 mins - 1 hour	Normal (BCS 3)	Dry food only	Rarely	No	None	No	Female	30 - 39 years	Dogs are my hobby/profession	Two or more	Two people	No	7 - 12 weeks	Born at my place/bought it	House with garden/non fenced area	4 or more kinds of tasks	30 mins - 1 hour	11 - 30 commands	4 or more activities	More than 8 hours	Yes
dog317	Healthy	Female	94	6 - 8	60	28	Pure	Neutered	No	>1 - 3 hours	Normal (BCS 3)	Cooked food	Rarely	No	None	No	Female	30 - 39 years	Dogs are my hobby/profession	Two or more	One person	No	7 - 12 weeks	Born at my place/bought it	House with garden/non fenced area	4 or more kinds of tasks	30 mins - 1 hour	11 - 30 commands	4 or more activities	More than 8 hours	No
dog319	Unhealthy	Male	153	> 12	37	11	Pure	Neutered	Yes	>1 - 3 hours	Normal (BCS 3)	Raw food	Rarely	Yes	tooth problems	No	Female	40 - 49 years	I have had a dog before	Two or more	One person	No	More than a year	Got as a present	Fenced garden	4 or more kinds of tasks	30 mins - 1 hour	11 - 30 commands	2 - 3 activities	3 - 8 hours	No
dog320	Unhealthy	Male	146	> 12	35	7	Pure	Intact	Yes	30 mins - 1 hour	Normal (BCS 3)	Raw food	Almost never	No	tooth problems	No	Female	>50 years	Dogs are my hobby/profession	Two or more	Two people	Yes	3 - 12 months	Born at my place/bought it	Fenced garden	4 or more kinds of tasks	Less than 30 mins	11 - 30 commands	One activity	None	Yes
dog321	Unhealthy	Female	29	1 - 3	40	11	Mixed	Neutered	No	>1 - 3 hours	Thin (BCS 1-2)	Mixed	Almost never	Yes	other disorders	Yes	Female	30 - 39 years	I have had a dog before	None	Two people	No	3 - 12 months	Found it/shelter	Urban/suburban apartment	4 or more kinds of tasks	>1 - 3 hours	11 - 30 commands	2 - 3 activities	None	No
dog323	Healthy	Female	34	1 - 3	50	20	Mixed	Neutered	No	30 mins - 1 hour	Thin (BCS 1-2)	Mixed	Almost never	Yes	None	No	Female	40 - 49 years	I have had a dog before	None	Four or more people	Yes	More than a year	Found it/shelter	Urban/suburban apartment	2 kinds of tasks	>1 - 3 hours	<10 commands	4 or more activities	1 - 2 hours	No
dog324	Unhealthy	Male	121	10 - 12	30	8	Mixed	Neutered	Yes	30 mins - 1 hour	Normal (BCS 3)	Mixed	Regularly (daily)	No	joint problems + tooth problems	Yes	Female	30 - 39 years	I have never had a dog before	None	Three people	Yes	More than a year	Found it/shelter	Urban/suburban apartment	3 kinds of tasks	30 mins - 1 hour	<10 commands	2 - 3 activities	3 - 8 hours	No
dog328	Unhealthy	Female	120	10 - 12	35	12	Mixed	Neutered	No	Less than 30 mins	Normal (BCS 3)	Cooked food	Almost never	Yes	other disorders	Yes	Female	<29 years	I have never had a dog before	None	Two people	No	More than a year	Found it/shelter	Urban/suburban apartment	Maximum a task	30 mins - 1 hour	<10 commands	2 - 3 activities	None	Yes
dog329	Unhealthy	Female	56	3 - 6	60	50	Pure	Neutered	No	30 mins - 1 hour	Over-weight (BCS 4-5)	Dry food only	Rarely	No	joint problems	No	Female	30 - 39 years	I have had a dog before	One	One person	No	7 - 12 weeks	Born at my place/bought it	Urban/suburban apartment	4 or more kinds of tasks	>1 - 3 hours	11 - 30 commands	2 - 3 activities	None	No
dog330	Unhealthy	Female	136	10 - 12	40	20	Pure	Neutered	No	30 mins - 1 hour	Over-weight (BCS 4-5)	Mixed	Rarely	Yes	joint problems	No	Female	<29 years	Dogs are my hobby/profession	One	Three people	No	7 - 12 weeks	Got as a present	Urban/suburban apartment	4 or more kinds of tasks	>1 - 3 hours	11 - 30 commands	One activity	3 - 8 hours	No
dog331	Healthy	Female	103	8 - 10	40	17	Pure	Intact	No	>1 - 3 hours	Normal (BCS 3)	Cooked food	Often	No	None	No	Female	40 - 49 years	I have had a dog before	None	Three people	No	7 - 12 weeks	Born at my place/bought it	Urban/suburban apartment	4 or more kinds of tasks	>1 - 3 hours	>30 commands	4 or more activities	1 - 2 hours	No
dog332	Unhealthy	Female	112	8 - 10	50	20	Mixed	Neutered	No	>1 - 3 hours	Normal (BCS 3)	Mixed	Rarely	Yes	tooth problems	No	Female	<29 years	Dogs are my hobby/profession	One	Three people	No	More than a year	Found it/shelter	Urban/suburban apartment	4 or more kinds of tasks	>1 - 3 hours	11 - 30 commands	4 or more activities	3 - 8 hours	No
dog333	Unhealthy	Male	130	10 - 12	30	12	Pure	Neutered	Yes	Less than 30 mins	Over-weight (BCS 4-5)	Cooked food	Rarely	No	joint problems + tooth problems	No	Male	>50 years	I have had a dog before	One	Three people	Yes	7 - 12 weeks	Born at my place/bought it	Urban/suburban apartment	2 kinds of tasks	more than 3 hours	11 - 30 commands	One activity	More than 8 hours	No
dog334	Unhealthy	Male	173	> 12	60	18	Pure	Intact	Yes	>1 - 3 hours	Thin (BCS 1-2)	Mixed	Rarely	Yes	joint problems + tooth problems	Yes	Female	>50 years	I have never had a dog before	One	Four or more people	Yes	Less than 7 weeks	Born at my place/bought it	House with garden/non fenced area	4 or more kinds of tasks	>1 - 3 hours	11 - 30 commands	2 - 3 activities	3 - 8 hours	Yes
dog335	Unhealthy	Male	76	6 - 8	30	12	Pure	Intact	No	30 mins - 1 hour	Normal (BCS 3)	Cooked food	Often	Yes	tooth problems	No	Male	>50 years	I have had a dog before	One	Three people	Yes	7 - 12 weeks	Born at my place/bought it	Urban/suburban apartment	3 kinds of tasks	more than 3 hours	11 - 30 commands	One activity	3 - 8 hours	No
dog336	Unhealthy	Female	163	> 12	30	8	Pure	Neutered	Yes	Less than 30 mins	Over-weight (BCS 4-5)	Mixed	Often	No	joint problems + tooth problems	Yes	Female	<29 years	I have never had a dog before	One	Two people	No	3 - 12 months	Born at my place/bought it	Urban/suburban apartment	3 kinds of tasks	>1 - 3 hours	11 - 30 commands	2 - 3 activities	3 - 8 hours	Yes
dog337	Healthy	Female	79	6 - 8	40	50	Mixed	Neutered	No	>3 - 7 hours	Normal (BCS 3)	Raw food	Almost never	Yes	None	No	Female	30 - 39 years	Dogs are my hobby/profession	One	Two people	Yes	7 - 12 weeks	Got as a present	Fenced garden	4 or more kinds of tasks	Less than 30 mins	11 - 30 commands	2 - 3 activities	More than 8 hours	No
dog338	Unhealthy	Male	121	10 - 12	30	8	Pure	Neutered	No	30 mins - 1 hour	Thin (BCS 1-2)	Dry food only	Often	No	tooth problems	No	Female	30 - 39 years	Dogs are my hobby/profession	One	One person	No	3 - 12 months	Got as a present	Urban/suburban apartment	4 or more kinds of tasks	more than 3 hours	11 - 30 commands	2 - 3 activities	1 - 2 hours	No
dog339	Unhealthy	Female	163	> 12	60	35	Mixed	Neutered	No	30 mins - 1 hour	Normal (BCS 3)	Mixed	Rarely	Yes	joint problems + tooth problems	No	Female	30 - 39 years	Dogs are my hobby/profession	Two or more	Two people	No	Less than 7 weeks	Born at my place/bought it	House with garden/non fenced area	4 or more kinds of tasks	30 mins - 1 hour	>30 commands	One activity	None	Yes
dog340	Healthy	Male	110	8 - 10	25	22	Mixed	Neutered	No	30 mins - 1 hour	Normal (BCS 3)	Mixed	Almost never	No	None	No	Female	30 - 39 years	I have had a dog before	None	Two people	No	More than a year	Found it/shelter	Fenced garden	4 or more kinds of tasks	30 mins - 1 hour	11 - 30 commands	4 or more activities	More than 8 hours	No
dog341	Unhealthy	Male	98	8 - 10	20	20	Pure	Neutered	No	Less than 30 mins	Over-weight (BCS 4-5)	Dry food only	Almost never	No	joint problems	No	Female	30 - 39 years	I have never had a dog before	None	Four or more people	Yes	7 - 12 weeks	Born at my place/bought it	Urban/suburban apartment	Maximum a task	>1 - 3 hours	<10 commands	2 - 3 activities	1 - 2 hours	Yes
dog342	Unhealthy	Female	52	3 - 6	33	5	Pure	Neutered	No	>1 - 3 hours	Normal (BCS 3)	Dry food only	Rarely	Yes	joint problems	No	Female	30 - 39 years	Dogs are my hobby/profession	Two or more	Three people	Yes	7 - 12 weeks	Born at my place/bought it	House with garden/non fenced area	3 kinds of tasks	30 mins - 1 hour	<10 commands	One activity	3 - 8 hours	No
dog343	Unhealthy	Male	127	10 - 12	26	5	Pure	Intact	No	Less than 30 mins	Normal (BCS 3)	Mixed	Often	No	joint problems	No	Female	>50 years	I have had a dog before	None	One person	No	7 - 12 weeks	Got as a present	Urban/suburban apartment	4 or more kinds of tasks	>1 - 3 hours	>30 commands	One activity	None	Yes
dog344	Unhealthy	Female	165	> 12	50	25	Pure	Neutered	No	More than 7 hours	Normal (BCS 3)	Mixed	Regularly (daily)	Yes	joint problems	Yes	Female	30 - 39 years	Dogs are my hobby/profession	None	Two people	No	3 - 12 months	Born at my place/bought it	Fenced garden	4 or more kinds of tasks	Less than 30 mins	>30 commands	One activity	3 - 8 hours	No
dog345	Healthy	Male	87	6 - 8	65	45	Pure	Intact	No	Less than 30 mins	Thin (BCS 1-2)	Tinned and dry food	Rarely	No	None	No	Female	<29 years	I have had a dog before	None	Four or more people	No	Less than 7 weeks	Born at my place/bought it	Fenced garden	3 kinds of tasks	>1 - 3 hours	<10 commands	2 - 3 activities	3 - 8 hours	No
dog346	Healthy	Male	101	8 - 10	43	17	Mixed	Neutered	No	>1 - 3 hours	Normal (BCS 3)	Dry food only	Often	No	None	No	Female	30 - 39 years	I have had a dog before	One	One person	No	7 - 12 weeks	Found it/shelter	Urban/suburban apartment	4 or more kinds of tasks	>1 - 3 hours	11 - 30 commands	4 or more activities	3 - 8 hours	Yes
dog347	Healthy	Male	75	6 - 8	40	20	Pure	Intact	No	>3 - 7 hours	Thin (BCS 1-2)	Dry food only	Rarely	No	None	No	Female	40 - 49 years	Dogs are my hobby/profession	One	Four or more people	Yes	Less than 7 weeks	Born at my place/bought it	Fenced garden	4 or more kinds of tasks	30 mins - 1 hour	>30 commands	4 or more activities	3 - 8 hours	No
dog348	Healthy	Female	72	6 - 8	59	44	Pure	Intact	No	30 mins - 1 hour	Normal (BCS 3)	Cooked food	Almost never	No	None	No	Male	30 - 39 years	I have had a dog before	One	Three people	No	7 - 12 weeks	Born at my place/bought it	Urban/suburban apartment	4 or more kinds of tasks	30 mins - 1 hour	11 - 30 commands	2 - 3 activities	1 - 2 hours	No
dog349	Unhealthy	Male	154	> 12	30	7	Pure	Neutered	No	Less than 30 mins	Normal (BCS 3)	Dry food only	Rarely	Yes	tooth problems	No	Female	<29 years	I have had a dog before	One	Three people	Yes	7 - 12 weeks	Born at my place/bought it	Urban/suburban apartment	2 kinds of tasks	>1 - 3 hours	<10 commands	2 - 3 activities	1 - 2 hours	No
dog352	Healthy	Female	14	1 - 3	35	25	Mixed	Neutered	No	More than 7 hours	Normal (BCS 3)	Raw food	Rarely	No	None	No	Female	30 - 39 years	I have had a dog before	One	One person	No	Less than 7 weeks	Found it/shelter	House with garden/non fenced area	4 or more kinds of tasks	30 mins - 1 hour	11 - 30 commands	4 or more activities	1 - 2 hours	No
dog354	Healthy	Female	89	6 - 8	48	16	Pure	Neutered	No	>1 - 3 hours	Normal (BCS 3)	Dry food only	Almost never	No	None	No	Female	>50 years	Dogs are my hobby/profession	None	Two people	No	More than a year	Got as a present	Urban/suburban apartment	4 or more kinds of tasks	>1 - 3 hours	>30 commands	2 - 3 activities	3 - 8 hours	No
dog355	Healthy	Female	94	6 - 8	20	7	Pure	Intact	No	>1 - 3 hours	Normal (BCS 3)	Raw food	Often	No	None	No	Male	40 - 49 years	Dogs are my hobby/profession	Two or more	One person	No	7 - 12 weeks	Born at my place/bought it	House with garden/non fenced area	4 or more kinds of tasks	>1 - 3 hours	<10 commands	4 or more activities	1 - 2 hours	No
dog358	Unhealthy	Female	55	3 - 6	45	30	Mixed	Neutered	Yes	>1 - 3 hours	Normal (BCS 3)	Raw food	Often	No	other disorders	Yes	Female	30 - 39 years	Dogs are my hobby/profession	Two or more	Two people	No	7 - 12 weeks	Born at my place/bought it	Urban/suburban apartment	4 or more kinds of tasks	30 mins - 1 hour	11 - 30 commands	4 or more activities	3 - 8 hours	Yes
dog359	Unhealthy	Female	25	1 - 3	55	40	Pure	Intact	No	30 mins - 1 hour	Normal (BCS 3)	Cooked food	Rarely	No	joint problems	No	Male	30 - 39 years	Dogs are my hobby/profession	One	One person	No	Less than 7 weeks	Got as a present	Fenced garden	3 kinds of tasks	30 mins - 1 hour	<10 commands	One activity	More than 8 hours	No
dog361	Healthy	Female	26	1 - 3	55	26	Mixed	Neutered	No	More than 7 hours	Normal (BCS 3)	Raw food	Almost never	No	None	No	Female	30 - 39 years	I have had a dog before	None	Two people	No	Less than 7 weeks	Got as a present	Fenced garden	4 or more kinds of tasks	30 mins - 1 hour	11 - 30 commands	4 or more activities	More than 8 hours	No
dog362	Unhealthy	Female	47	3 - 6	37	14	Pure	Neutered	No	>3 - 7 hours	Thin (BCS 1-2)	Cooked food	Almost never	Yes	other disorders	No	Female	30 - 39 years	Dogs are my hobby/profession	One	Two people	No	Less than 7 weeks	Got as a present	House with garden/non fenced area	2 kinds of tasks	>1 - 3 hours	<10 commands	2 - 3 activities	More than 8 hours	No
dog363	Unhealthy	Male	42	3 - 6	64	30	Mixed	Neutered	No	>3 - 7 hours	Normal (BCS 3)	Dry food only	Rarely	No	other disorders	Yes	Female	30 - 39 years	I have had a dog before	None	One person	No	More than a year	Found it/shelter	Urban/suburban apartment	4 or more kinds of tasks	>1 - 3 hours	11 - 30 commands	2 - 3 activities	More than 8 hours	Yes
dog364	Healthy	Female	20	1 - 3	40	16	Pure	Neutered	No	>1 - 3 hours	Normal (BCS 3)	Cooked food	Almost never	No	None	No	Female	40 - 49 years	I have never had a dog before	None	Four or more people	Yes	3 - 12 months	Found it/shelter	Urban/suburban apartment	4 or more kinds of tasks	>1 - 3 hours	11 - 30 commands	2 - 3 activities	3 - 8 hours	No
dog365	Healthy	Female	159	> 12	45	29	Mixed	Neutered	No	>3 - 7 hours	Normal (BCS 3)	Raw food	Rarely	No	None	No	Female	30 - 39 years	Dogs are my hobby/profession	One	Two people	No	Less than 7 weeks	Got as a present	House with garden/non fenced area	4 or more kinds of tasks	>1 - 3 hours	11 - 30 commands	2 - 3 activities	3 - 8 hours	No
dog366	Healthy	Male	42	3 - 6	55	26	Pure	Neutered	No	>3 - 7 hours	Normal (BCS 3)	Dry food only	Rarely	Yes	None	No	Female	>50 years	Dogs are my hobby/profession	None	Two people	No	3 - 12 months	Born at my place/bought it	Urban/suburban apartment	4 or more kinds of tasks	>1 - 3 hours	11 - 30 commands	4 or more activities	3 - 8 hours	No
dog367	Unhealthy	Female	133	10 - 12	40	13	Pure	Neutered	No	Less than 30 mins	Normal (BCS 3)	Dry food only	Often	No	tooth problems	No	Female	40 - 49 years	Dogs are my hobby/profession	Two or more	Three people	Yes	7 - 12 weeks	Born at my place/bought it	Fenced garden	3 kinds of tasks	Less than 30 mins	<10 commands	One activity	3 - 8 hours	No
dog368	Unhealthy	Female	111	8 - 10	72	52	Pure	Intact	No	30 mins - 1 hour	Normal (BCS 3)	Cooked food	Almost never	No	joint problems	Yes	Female	40 - 49 years	Dogs are my hobby/profession	None	One person	No	3 - 12 months	Born at my place/bought it	Urban/suburban apartment	4 or more kinds of tasks	>1 - 3 hours	>30 commands	4 or more activities	3 - 8 hours	Yes
dog369	Unhealthy	Female	147	> 12	60	51	Pure	Neutered	No	>1 - 3 hours	Over-weight (BCS 4-5)	Dry food only	Often	No	tooth problems	No	Female	30 - 39 years	I have had a dog before	Two or more	Four or more people	No	7 - 12 weeks	Got as a present	Urban/suburban apartment	3 kinds of tasks	30 mins - 1 hour	<10 commands	One activity	3 - 8 hours	Yes
dog370	Unhealthy	Female	21	1 - 3	54	35	Pure	Neutered	No	>1 - 3 hours	Normal (BCS 3)	Raw food	Rarely	No	joint problems	No	Male	30 - 39 years	I have had a dog before	None	Two people	No	7 - 12 weeks	Got as a present	Urban/suburban apartment	4 or more kinds of tasks	30 mins - 1 hour	11 - 30 commands	4 or more activities	1 - 2 hours	No
dog371	Healthy	Female	101	8 - 10	46	17	Mixed	Neutered	No	>1 - 3 hours	Normal (BCS 3)	Raw food	Regularly (daily)	Yes	None	No	Female	30 - 39 years	I have had a dog before	One	Two people	No	3 - 12 months	Found it/shelter	Urban/suburban apartment	4 or more kinds of tasks	>1 - 3 hours	>30 commands	4 or more activities	None	No
dog372	Healthy	Female	66	3 - 6	48	18	Mixed	Intact	No	>1 - 3 hours	Normal (BCS 3)	Raw food	Rarely	No	None	No	Female	>50 years	Dogs are my hobby/profession	None	Two people	No	3 - 12 months	Found it/shelter	Urban/suburban apartment	4 or more kinds of tasks	>1 - 3 hours	>30 commands	4 or more activities	1 - 2 hours	No
dog373	Healthy	Female	24	1 - 3	40	28	Pure	Neutered	No	>1 - 3 hours	Thin (BCS 1-2)	Raw food	Rarely	No	None	No	Male	<29 years	I have never had a dog before	One	Four or more people	Yes	Less than 7 weeks	Born at my place/bought it	Fenced garden	4 or more kinds of tasks	30 mins - 1 hour	11 - 30 commands	4 or more activities	1 - 2 hours	No
dog374	Healthy	Male	99	8 - 10	50	50	Pure	Intact	No	More than 7 hours	Normal (BCS 3)	Tinned and dry food	Almost never	No	None	No	Female	<29 years	I have had a dog before	Two or more	Three people	No	7 - 12 weeks	Born at my place/bought it	Fenced garden	3 kinds of tasks	30 mins - 1 hour	<10 commands	2 - 3 activities	1 - 2 hours	No
dog375	Healthy	Female	35	1 - 3	45	10	Mixed	Neutered	No	More than 7 hours	Normal (BCS 3)	Mixed	Almost never	No	None	No	Female	40 - 49 years	I have had a dog before	One	Two people	No	Less than 7 weeks	Got as a present	Fenced garden	4 or more kinds of tasks	30 mins - 1 hour	<10 commands	One activity	3 - 8 hours	No
dog376	Unhealthy	Male	79	6 - 8	26	5	Mixed	Neutered	No	Less than 30 mins	Normal (BCS 3)	Cooked food	Rarely	Yes	other disorders	No	Female	40 - 49 years	I have never had a dog before	One	Two people	Yes	3 - 12 months	Got as a present	Urban/suburban apartment	4 or more kinds of tasks	>1 - 3 hours	11 - 30 commands	2 - 3 activities	3 - 8 hours	No
dog377	Unhealthy	Male	157	> 12	39	13	Pure	Neutered	Yes	>1 - 3 hours	Normal (BCS 3)	Cooked food	Almost never	No	tooth problems	No	Female	>50 years	I have had a dog before	One	Two people	No	Less than 7 weeks	Born at my place/bought it	Urban/suburban apartment	4 or more kinds of tasks	>1 - 3 hours	11 - 30 commands	2 - 3 activities	3 - 8 hours	No
dog379	Unhealthy	Female	154	> 12	50	25	Pure	Neutered	Yes	Less than 30 mins	Normal (BCS 3)	Mixed	Often	Yes	joint problems + tooth problems	No	Female	<29 years	I have never had a dog before	None	Three people	No	Less than 7 weeks	Born at my place/bought it	Urban/suburban apartment	4 or more kinds of tasks	>1 - 3 hours	<10 commands	2 - 3 activities	3 - 8 hours	Yes
dog380	Unhealthy	Female	139	10 - 12	15	3	Pure	Neutered	Yes	More than 7 hours	Over-weight (BCS 4-5)	Cooked food	Regularly (daily)	No	joint problems + tooth problems	No	Female	>50 years	I have had a dog before	None	Two people	No	7 - 12 weeks	Born at my place/bought it	Urban/suburban apartment	2 kinds of tasks	more than 3 hours	<10 commands	2 - 3 activities	None	No
dog381	Unhealthy	Male	76	6 - 8	20	4	Mixed	Intact	No	>1 - 3 hours	Normal (BCS 3)	Mixed	Often	No	other disorders	No	Female	<29 years	I have had a dog before	Two or more	Three people	No	7 - 12 weeks	Born at my place/bought it	House with garden/non fenced area	Maximum a task	>1 - 3 hours	<10 commands	One activity	None	No
dog382	Healthy	Male	110	8 - 10	50	36	Pure	Neutered	No	Less than 30 mins	Normal (BCS 3)	Dry food only	Almost never	No	None	No	Male	<29 years	I have never had a dog before	One	Four or more people	No	7 - 12 weeks	Born at my place/bought it	Fenced garden	4 or more kinds of tasks	30 mins - 1 hour	11 - 30 commands	2 - 3 activities	3 - 8 hours	No
dog383	Unhealthy	Female	57	3 - 6	20	4	Pure	Intact	No	30 mins - 1 hour	Over-weight (BCS 4-5)	Cooked food	Often	No	joint problems	Yes	Female	<29 years	I have never had a dog before	None	Three people	No	7 - 12 weeks	Got as a present	Urban/suburban apartment	4 or more kinds of tasks	>1 - 3 hours	11 - 30 commands	2 - 3 activities	3 - 8 hours	No
dog384	Healthy	Male	28	1 - 3	25	10	Pure	Neutered	No	30 mins - 1 hour	Normal (BCS 3)	Cooked food	Often	No	None	No	Female	<29 years	I have never had a dog before	One	One person	No	7 - 12 weeks	Born at my place/bought it	Urban/suburban apartment	4 or more kinds of tasks	>1 - 3 hours	11 - 30 commands	2 - 3 activities	3 - 8 hours	Yes
dog385	Unhealthy	Female	44	3 - 6	29	10	Pure	Intact	No	>1 - 3 hours	Normal (BCS 3)	Cooked food	Rarely	No	other disorders	No	Female	40 - 49 years	I have never had a dog before	One	One person	No	3 - 12 months	Born at my place/bought it	Urban/suburban apartment	4 or more kinds of tasks	>1 - 3 hours	11 - 30 commands	4 or more activities	More than 8 hours	Yes
dog386	Unhealthy	Female	194	> 12	18	4	Pure	Neutered	Yes	30 mins - 1 hour	Normal (BCS 3)	Cooked food	Often	No	tooth problems	No	Female	<29 years	I have had a dog before	None	Two people	No	7 - 12 weeks	Born at my place/bought it	House with garden/non fenced area	4 or more kinds of tasks	30 mins - 1 hour	<10 commands	One activity	3 - 8 hours	Yes
dog388	Unhealthy	Female	199	> 12	57	24	Mixed	Neutered	Yes	Less than 30 mins	Normal (BCS 3)	Dry food only	Rarely	No	joint problems	Yes	Female	>50 years	I have had a dog before	Two or more	One person	No	Less than 7 weeks	Got as a present	Urban/suburban apartment	4 or more kinds of tasks	30 mins - 1 hour	11 - 30 commands	One activity	3 - 8 hours	No
dog389	Unhealthy	Female	113	8 - 10	25	5	Mixed	Neutered	Yes	30 mins - 1 hour	Thin (BCS 1-2)	Dry food only	Often	No	other disorders	No	Female	30 - 39 years	Dogs are my hobby/profession	One	One person	No	Less than 7 weeks	Born at my place/bought it	Urban/suburban apartment	4 or more kinds of tasks	>1 - 3 hours	<10 commands	4 or more activities	More than 8 hours	No
dog390	Unhealthy	Female	136	10 - 12	35	21	Pure	Intact	No	Less than 30 mins	Thin (BCS 1-2)	Mixed	Almost never	No	other disorders	No	Female	>50 years	I have had a dog before	Two or more	One person	No	Less than 7 weeks	Born at my place/bought it	Urban/suburban apartment	Maximum a task	30 mins - 1 hour	<10 commands	One activity	3 - 8 hours	No
dog391	Unhealthy	Female	106	8 - 10	56	26	Pure	Intact	No	>1 - 3 hours	Normal (BCS 3)	Raw food	Almost never	No	other disorders	No	Female	>50 years	Dogs are my hobby/profession	Two or more	One person	No	Less than 7 weeks	Born at my place/bought it	Urban/suburban apartment	4 or more kinds of tasks	>1 - 3 hours	>30 commands	4 or more activities	3 - 8 hours	No
dog393	Unhealthy	Female	95	6 - 8	45	30	Pure	Neutered	No	30 mins - 1 hour	Normal (BCS 3)	Cooked food	Almost never	No	joint problems	No	Female	30 - 39 years	I have never had a dog before	None	Two people	No	7 - 12 weeks	Born at my place/bought it	Urban/suburban apartment	4 or more kinds of tasks	30 mins - 1 hour	11 - 30 commands	2 - 3 activities	1 - 2 hours	No
dog394	Unhealthy	Female	180	> 12	25	6	Pure	Neutered	Yes	Less than 30 mins	Over-weight (BCS 4-5)	Tinned and dry food	Almost never	No	joint problems + tooth problems	No	Female	40 - 49 years	I have had a dog before	None	Four or more people	No	Less than 7 weeks	Born at my place/bought it	Urban/suburban apartment	Maximum a task	Less than 30 mins	<10 commands	One activity	More than 8 hours	Yes
dog396	Unhealthy	Male	104	8 - 10	65	35	Pure	Neutered	No	>3 - 7 hours	Normal (BCS 3)	Cooked food	Rarely	No	other disorders	No	Female	<29 years	Dogs are my hobby/profession	None	Three people	No	7 - 12 weeks	Born at my place/bought it	House with garden/non fenced area	4 or more kinds of tasks	30 mins - 1 hour	11 - 30 commands	2 - 3 activities	3 - 8 hours	No
dog397	Unhealthy	Female	121	10 - 12	50	30	Mixed	Neutered	Yes	Less than 30 mins	Over-weight (BCS 4-5)	Mixed	Often	No	joint problems + tooth problems	No	Male	30 - 39 years	I have had a dog before	None	Two people	No	More than a year	Found it/shelter	Urban/suburban apartment	Maximum a task	30 mins - 1 hour	<10 commands	2 - 3 activities	More than 8 hours	No
dog399	Healthy	Female	22	1 - 3	45	20	Mixed	Neutered	No	30 mins - 1 hour	Normal (BCS 3)	Tinned and dry food	Almost never	No	None	No	Female	<29 years	I have never had a dog before	None	Two people	No	3 - 12 months	Found it/shelter	Urban/suburban apartment	4 or more kinds of tasks	>1 - 3 hours	11 - 30 commands	4 or more activities	3 - 8 hours	Yes
dog400	Unhealthy	Female	138	10 - 12	25	12	Pure	Intact	No	30 mins - 1 hour	Over-weight (BCS 4-5)	Dry food only	Regularly (daily)	No	tooth problems	No	Female	<29 years	I have had a dog before	One	Three people	No	7 - 12 weeks	Found it/shelter	Fenced garden	4 or more kinds of tasks	30 mins - 1 hour	<10 commands	2 - 3 activities	1 - 2 hours	No
dog401	Healthy	Male	50	3 - 6	50	10	Mixed	Neutered	No	Less than 30 mins	Normal (BCS 3)	Mixed	Rarely	Yes	None	No	Female	<29 years	I have had a dog before	One	Three people	No	More than a year	Found it/shelter	Urban/suburban apartment	2 kinds of tasks	30 mins - 1 hour	<10 commands	2 - 3 activities	3 - 8 hours	No
dog402	Unhealthy	Female	97	8 - 10	65	28	Mixed	Neutered	No	More than 7 hours	Normal (BCS 3)	Mixed	Rarely	No	other disorders	No	Female	<29 years	I have never had a dog before	None	Four or more people	No	Less than 7 weeks	Found it/shelter	Fenced garden	4 or more kinds of tasks	>1 - 3 hours	<10 commands	4 or more activities	3 - 8 hours	No
dog403	Unhealthy	Female	105	8 - 10	50	25	Pure	Neutered	Yes	>1 - 3 hours	Normal (BCS 3)	Cooked food	Almost never	Yes	other disorders	No	Female	30 - 39 years	Dogs are my hobby/profession	Two or more	Three people	No	More than a year	Got as a present	House with garden/non fenced area	3 kinds of tasks	>1 - 3 hours	<10 commands	2 - 3 activities	None	No
dog404	Healthy	Female	34	1 - 3	50	15	Mixed	Intact	No	Less than 30 mins	Normal (BCS 3)	Mixed	Rarely	No	None	No	Female	<29 years	I have had a dog before	None	Three people	Yes	Less than 7 weeks	Found it/shelter	Urban/suburban apartment	4 or more kinds of tasks	>1 - 3 hours	11 - 30 commands	4 or more activities	3 - 8 hours	No
dog405	Unhealthy	Male	39	3 - 6	60	29	Pure	Neutered	No	>1 - 3 hours	Thin (BCS 1-2)	Dry food only	Rarely	Yes	other disorders	Yes	Female	<29 years	I have had a dog before	One	One person	No	3 - 12 months	Found it/shelter	Urban/suburban apartment	2 kinds of tasks	>1 - 3 hours	11 - 30 commands	4 or more activities	3 - 8 hours	No
dog406	Unhealthy	Male	186	> 12	55	28	Mixed	Intact	Yes	30 mins - 1 hour	Normal (BCS 3)	Cooked food	Often	Yes	joint problems	No	Female	30 - 39 years	I have had a dog before	Two or more	Four or more people	No	More than a year	Found it/shelter	Urban/suburban apartment	3 kinds of tasks	Less than 30 mins	<10 commands	One activity	3 - 8 hours	No
dog407	Unhealthy	Female	147	> 12	28	9	Pure	Intact	Yes	>1 - 3 hours	Over-weight (BCS 4-5)	Tinned and dry food	Rarely	Yes	other disorders	No	Female	40 - 49 years	Dogs are my hobby/profession	Two or more	Four or more people	Yes	Less than 7 weeks	Born at my place/bought it	Urban/suburban apartment	3 kinds of tasks	more than 3 hours	<10 commands	2 - 3 activities	3 - 8 hours	Yes
dog409	Unhealthy	Male	102	8 - 10	30	12	Pure	Neutered	Yes	Less than 30 mins	Over-weight (BCS 4-5)	Dry food only	Regularly (daily)	No	joint problems	Yes	Female	40 - 49 years	I have never had a dog before	Two or more	One person	No	Less than 7 weeks	Born at my place/bought it	Urban/suburban apartment	4 or more kinds of tasks	>1 - 3 hours	11 - 30 commands	4 or more activities	1 - 2 hours	Yes
dog410	Unhealthy	Male	100	8 - 10	66	26	Mixed	Neutered	No	>1 - 3 hours	Normal (BCS 3)	Mixed	Regularly (daily)	Yes	other disorders	Yes	Female	30 - 39 years	I have had a dog before	None	One person	No	More than a year	Found it/shelter	Urban/suburban apartment	3 kinds of tasks	>1 - 3 hours	11 - 30 commands	2 - 3 activities	More than 8 hours	No
dog411	Healthy	Female	98	8 - 10	45	22	Pure	Intact	No	Less than 30 mins	Normal (BCS 3)	Mixed	Almost never	Yes	None	No	Female	<29 years	I have had a dog before	None	Four or more people	No	7 - 12 weeks	Got as a present	Fenced garden	4 or more kinds of tasks	Less than 30 mins	>30 commands	2 - 3 activities	3 - 8 hours	No
dog412	Healthy	Male	32	1 - 3	35	8	Pure	Intact	No	>1 - 3 hours	Thin (BCS 1-2)	Raw food	Almost never	No	None	No	Female	>50 years	I have had a dog before	One	One person	No	7 - 12 weeks	Born at my place/bought it	Urban/suburban apartment	4 or more kinds of tasks	>1 - 3 hours	11 - 30 commands	4 or more activities	1 - 2 hours	No
dog414	Healthy	Male	16	1 - 3	50	10	Pure	Intact	No	More than 7 hours	Normal (BCS 3)	Tinned and dry food	Rarely	No	None	No	Male	40 - 49 years	I have had a dog before	None	Two people	No	Less than 7 weeks	Got as a present	Fenced garden	2 kinds of tasks	30 mins - 1 hour	<10 commands	One activity	More than 8 hours	No
dog415	Unhealthy	Male	137	10 - 12	25	10	Pure	Intact	Yes	>1 - 3 hours	Over-weight (BCS 4-5)	Cooked food	Often	No	joint problems + tooth problems	No	Female	<29 years	I have never had a dog before	None	Two people	No	3 - 12 months	Born at my place/bought it	Urban/suburban apartment	3 kinds of tasks	>1 - 3 hours	<10 commands	2 - 3 activities	More than 8 hours	No
dog416	Healthy	Female	114	8 - 10	40	24	Mixed	Neutered	No	>1 - 3 hours	Normal (BCS 3)	Dry food only	Regularly (daily)	Yes	None	No	Male	30 - 39 years	Dogs are my hobby/profession	Two or more	Two people	No	7 - 12 weeks	Found it/shelter	Urban/suburban apartment	4 or more kinds of tasks	30 mins - 1 hour	11 - 30 commands	4 or more activities	More than 8 hours	No
dog418	Unhealthy	Female	170	> 12	60	19	Pure	Neutered	Yes	Less than 30 mins	Normal (BCS 3)	Tinned and dry food	Regularly (daily)	No	tooth problems	No	Female	>50 years	I have never had a dog before	None	Two people	Yes	Less than 7 weeks	Born at my place/bought it	Urban/suburban apartment	4 or more kinds of tasks	30 mins - 1 hour	11 - 30 commands	One activity	3 - 8 hours	Yes
dog419	Healthy	Female	80	6 - 8	30	6	Pure	Neutered	No	>1 - 3 hours	Normal (BCS 3)	Dry food only	Almost never	Yes	None	No	Male	<29 years	I have had a dog before	None	One person	No	More than a year	Found it/shelter	Urban/suburban apartment	Maximum a task	>1 - 3 hours	<10 commands	One activity	3 - 8 hours	No
dog420	Healthy	Female	54	3 - 6	60	30	Pure	Neutered	No	More than 7 hours	Normal (BCS 3)	Mixed	Often	Yes	None	No	Male	<29 years	I have had a dog before	Two or more	Two people	No	More than a year	Found it/shelter	Fenced garden	3 kinds of tasks	Less than 30 mins	<10 commands	One activity	More than 8 hours	No
dog422	Healthy	Female	57	3 - 6	56	20	Mixed	Neutered	No	>1 - 3 hours	Over-weight (BCS 4-5)	Cooked food	Often	Yes	None	No	Female	<29 years	I have never had a dog before	None	Two people	No	Less than 7 weeks	Found it/shelter	Urban/suburban apartment	4 or more kinds of tasks	>1 - 3 hours	11 - 30 commands	4 or more activities	More than 8 hours	No
dog423	Unhealthy	Male	169	> 12	68	38	Pure	Neutered	Yes	Less than 30 mins	Thin (BCS 1-2)	Mixed	Regularly (daily)	No	other disorders	Yes	Female	30 - 39 years	Dogs are my hobby/profession	One	Four or more people	Yes	More than a year	Got as a present	Fenced garden	3 kinds of tasks	Less than 30 mins	11 - 30 commands	One activity	3 - 8 hours	Yes
dog424	Unhealthy	Female	96	8 - 10	40	8	Pure	Neutered	No	Less than 30 mins	Normal (BCS 3)	Mixed	Often	No	tooth problems	No	Female	<29 years	I have had a dog before	None	Three people	No	Less than 7 weeks	Got as a present	Fenced garden	2 kinds of tasks	30 mins - 1 hour	<10 commands	2 - 3 activities	1 - 2 hours	No
dog425	Unhealthy	Male	135	10 - 12	27	9	Mixed	Intact	No	>1 - 3 hours	Normal (BCS 3)	Mixed	Rarely	No	tooth problems	No	Female	40 - 49 years	I have had a dog before	None	Two people	No	7 - 12 weeks	Got as a present	House with garden/non fenced area	4 or more kinds of tasks	30 mins - 1 hour	<10 commands	4 or more activities	1 - 2 hours	No
dog426	Unhealthy	Female	102	8 - 10	20	5	Pure	Neutered	No	30 mins - 1 hour	Normal (BCS 3)	Dry food only	Regularly (daily)	Yes	joint problems + tooth problems	Yes	Female	30 - 39 years	I have never had a dog before	None	Three people	Yes	7 - 12 weeks	Found it/shelter	Urban/suburban apartment	2 kinds of tasks	>1 - 3 hours	<10 commands	2 - 3 activities	3 - 8 hours	No
dog427	Unhealthy	Female	102	8 - 10	40	35	Pure	Neutered	No	30 mins - 1 hour	Over-weight (BCS 4-5)	Dry food only	Rarely	Yes	other disorders	No	Female	30 - 39 years	I have had a dog before	None	Two people	No	More than a year	Got as a present	Fenced garden	4 or more kinds of tasks	>1 - 3 hours	11 - 30 commands	2 - 3 activities	None	No
dog428	Healthy	Male	96	8 - 10	52	7	Mixed	Neutered	No	30 mins - 1 hour	Thin (BCS 1-2)	Tinned and dry food	Regularly (daily)	No	None	No	Female	40 - 49 years	Dogs are my hobby/profession	Two or more	One person	No	3 - 12 months	Found it/shelter	Urban/suburban apartment	4 or more kinds of tasks	30 mins - 1 hour	11 - 30 commands	4 or more activities	3 - 8 hours	Yes
dog429	Unhealthy	Male	159	> 12	45	23	Mixed	Neutered	Yes	Less than 30 mins	Thin (BCS 1-2)	Dry food only	Often	Yes	other disorders	No	Female	<29 years	I have never had a dog before	None	One person	No	More than a year	Found it/shelter	Urban/suburban apartment	3 kinds of tasks	>1 - 3 hours	>30 commands	4 or more activities	More than 8 hours	No
dog430	Unhealthy	Male	206	> 12	15	10	Mixed	Neutered	Yes	30 mins - 1 hour	Over-weight (BCS 4-5)	Cooked food	Rarely	Yes	tooth problems	No	Female	>50 years	I have had a dog before	Two or more	Four or more people	Yes	More than a year	Found it/shelter	House with garden/non fenced area	3 kinds of tasks	>1 - 3 hours	<10 commands	2 - 3 activities	3 - 8 hours	Yes
dog431	Unhealthy	Female	124	10 - 12	30	25	Pure	Neutered	No	>3 - 7 hours	Over-weight (BCS 4-5)	Cooked food	Regularly (daily)	No	tooth problems	No	Female	30 - 39 years	I have never had a dog before	None	Two people	No	Less than 7 weeks	Born at my place/bought it	Urban/suburban apartment	2 kinds of tasks	30 mins - 1 hour	<10 commands	One activity	More than 8 hours	No
dog432	Healthy	Female	155	> 12	30	7	Pure	Neutered	No	30 mins - 1 hour	Over-weight (BCS 4-5)	Tinned and dry food	Rarely	No	None	No	Female	<29 years	I have never had a dog before	None	Two people	No	7 - 12 weeks	Born at my place/bought it	Urban/suburban apartment	2 kinds of tasks	>1 - 3 hours	<10 commands	One activity	1 - 2 hours	No
dog433	Unhealthy	Female	111	8 - 10	53	29	Pure	Neutered	No	30 mins - 1 hour	Normal (BCS 3)	Dry food only	Often	No	tooth problems	Yes	Female	>50 years	Dogs are my hobby/profession	Two or more	Four or more people	Yes	7 - 12 weeks	Born at my place/bought it	House with garden/non fenced area	4 or more kinds of tasks	>1 - 3 hours	11 - 30 commands	2 - 3 activities	3 - 8 hours	Yes
dog435	Unhealthy	Female	169	> 12	42	13	Mixed	Neutered	Yes	30 mins - 1 hour	Thin (BCS 1-2)	Tinned and dry food	Almost never	No	None	No	Female	<29 years	Dogs are my hobby/profession	One	Three people	No	3 - 12 months	Got as a present	House with garden/non fenced area	4 or more kinds of tasks	30 mins - 1 hour	>30 commands	4 or more activities	3 - 8 hours	No
dog436	Unhealthy	Female	97	8 - 10	38	9	Pure	Neutered	No	30 mins - 1 hour	Thin (BCS 1-2)	Tinned and dry food	Almost never	Yes	other disorders	No	Female	<29 years	Dogs are my hobby/profession	One	Three people	No	3 - 12 months	Born at my place/bought it	House with garden/non fenced area	4 or more kinds of tasks	30 mins - 1 hour	>30 commands	4 or more activities	3 - 8 hours	No
dog437	Unhealthy	Female	134	10 - 12	37	14	Mixed	Neutered	No	30 mins - 1 hour	Normal (BCS 3)	Cooked food	Rarely	No	tooth problems	No	Female	>50 years	I have had a dog before	Two or more	Four or more people	Yes	7 - 12 weeks	Born at my place/bought it	Fenced garden	3 kinds of tasks	Less than 30 mins	<10 commands	2 - 3 activities	3 - 8 hours	No
dog438	Unhealthy	Male	193	> 12	42	15	Pure	Neutered	Yes	>1 - 3 hours	Normal (BCS 3)	Cooked food	Almost never	No	other disorders	Yes	Male	>50 years	Dogs are my hobby/profession	One	Two people	No	More than a year	Born at my place/bought it	Urban/suburban apartment	4 or more kinds of tasks	>1 - 3 hours	11 - 30 commands	2 - 3 activities	1 - 2 hours	Yes
dog439	Healthy	Male	156	> 12	65	37	Pure	Intact	No	More than 7 hours	Over-weight (BCS 4-5)	Cooked food	Rarely	No	None	No	Female	30 - 39 years	I have never had a dog before	One	Two people	No	More than a year	Got as a present	House with garden/non fenced area	Maximum a task	>1 - 3 hours	<10 commands	One activity	3 - 8 hours	No
dog440	Unhealthy	Female	86	6 - 8	30	10	Mixed	Neutered	No	>1 - 3 hours	Normal (BCS 3)	Cooked food	Often	Yes	joint problems	No	Female	40 - 49 years	I have had a dog before	None	One person	No	More than a year	Found it/shelter	Urban/suburban apartment	2 kinds of tasks	>1 - 3 hours	11 - 30 commands	4 or more activities	3 - 8 hours	No
dog441	Unhealthy	Female	176	> 12	55	20	Pure	Neutered	Yes	More than 7 hours	Normal (BCS 3)	Cooked food	Rarely	No	joint problems	No	Male	>50 years	I have had a dog before	Two or more	Two people	No	7 - 12 weeks	Born at my place/bought it	Fenced garden	4 or more kinds of tasks	Less than 30 mins	<10 commands	One activity	3 - 8 hours	No
dog442	Unhealthy	Female	159	> 12	70	45	Mixed	Neutered	Yes	30 mins - 1 hour	Over-weight (BCS 4-5)	Raw food	Often	Yes	joint problems + tooth problems	No	Female	>50 years	Dogs are my hobby/profession	None	Two people	No	3 - 12 months	Found it/shelter	Urban/suburban apartment	4 or more kinds of tasks	>1 - 3 hours	<10 commands	2 - 3 activities	3 - 8 hours	No
dog443	Unhealthy	Male	117	8 - 10	65	34	Mixed	Neutered	No	>1 - 3 hours	Normal (BCS 3)	Tinned and dry food	Regularly (daily)	No	tooth problems	No	Female	30 - 39 years	I have had a dog before	Two or more	Two people	No	7 - 12 weeks	Got as a present	House with garden/non fenced area	4 or more kinds of tasks	more than 3 hours	11 - 30 commands	2 - 3 activities	1 - 2 hours	No
dog444	Unhealthy	Male	132	10 - 12	41	12	Pure	Intact	No	>1 - 3 hours	Normal (BCS 3)	Dry food only	Rarely	No	tooth problems	No	Female	>50 years	Dogs are my hobby/profession	Two or more	One person	No	7 - 12 weeks	Born at my place/bought it	House with garden/non fenced area	4 or more kinds of tasks	>1 - 3 hours	11 - 30 commands	2 - 3 activities	None	No
dog445	Unhealthy	Female	124	10 - 12	50	30	Pure	Neutered	Yes	More than 7 hours	Normal (BCS 3)	Cooked food	Almost never	No	joint problems + tooth problems	No	Female	>50 years	I have had a dog before	Two or more	Two people	No	3 - 12 months	Born at my place/bought it	Fenced garden	Maximum a task	30 mins - 1 hour	<10 commands	One activity	None	No
dog447	Unhealthy	Male	73	6 - 8	15	10	Pure	Neutered	Yes	More than 7 hours	Over-weight (BCS 4-5)	Cooked food	Almost never	Yes	tooth problems	No	Female	>50 years	I have had a dog before	Two or more	Two people	No	Less than 7 weeks	Born at my place/bought it	Fenced garden	4 or more kinds of tasks	30 mins - 1 hour	<10 commands	One activity	None	No
dog448	Unhealthy	Female	124	10 - 12	43	19	Pure	Neutered	No	>1 - 3 hours	Normal (BCS 3)	Dry food only	Rarely	No	joint problems	No	Female	40 - 49 years	Dogs are my hobby/profession	One	Two people	No	More than a year	Born at my place/bought it	Urban/suburban apartment	4 or more kinds of tasks	>1 - 3 hours	11 - 30 commands	4 or more activities	1 - 2 hours	No
dog449	Unhealthy	Female	103	8 - 10	45	27	Pure	Neutered	Yes	>1 - 3 hours	Thin (BCS 1-2)	Raw food	Often	No	joint problems	No	Female	30 - 39 years	I have had a dog before	None	Two people	No	More than a year	Got as a present	Urban/suburban apartment	4 or more kinds of tasks	>1 - 3 hours	<10 commands	2 - 3 activities	3 - 8 hours	No
dog450	Unhealthy	Female	128	10 - 12	30	8	Pure	Neutered	No	Less than 30 mins	Normal (BCS 3)	Mixed	Almost never	No	joint problems	No	Female	>50 years	I have never had a dog before	None	Four or more people	Yes	7 - 12 weeks	Born at my place/bought it	Urban/suburban apartment	Maximum a task	30 mins - 1 hour	<10 commands	One activity	3 - 8 hours	No
dog451	Healthy	Male	94	6 - 8	45	32	Pure	Intact	No	>3 - 7 hours	Normal (BCS 3)	Mixed	Rarely	No	None	No	Male	>50 years	I have had a dog before	None	Two people	No	7 - 12 weeks	Born at my place/bought it	Urban/suburban apartment	4 or more kinds of tasks	>1 - 3 hours	<10 commands	4 or more activities	3 - 8 hours	No
dog453	Unhealthy	Male	158	> 12	55	30	Pure	Neutered	Yes	30 mins - 1 hour	Normal (BCS 3)	Dry food only	Rarely	Yes	joint problems	Yes	Female	40 - 49 years	Dogs are my hobby/profession	Two or more	Four or more people	Yes	3 - 12 months	Born at my place/bought it	House with garden/non fenced area	4 or more kinds of tasks	30 mins - 1 hour	11 - 30 commands	One activity	3 - 8 hours	No
dog454	Unhealthy	Male	115	8 - 10	60	18	Mixed	Intact	No	>1 - 3 hours	Normal (BCS 3)	Dry food only	Rarely	Yes	tooth problems	No	Female	>50 years	I have never had a dog before	None	Two people	No	More than a year	Found it/shelter	House with garden/non fenced area	4 or more kinds of tasks	30 mins - 1 hour	11 - 30 commands	4 or more activities	More than 8 hours	Yes
dog455	Unhealthy	Male	163	> 12	43	13	Pure	Neutered	Yes	30 mins - 1 hour	Normal (BCS 3)	Dry food only	Rarely	No	joint problems	Yes	Female	40 - 49 years	Dogs are my hobby/profession	Two or more	Four or more people	Yes	7 - 12 weeks	Born at my place/bought it	Urban/suburban apartment	4 or more kinds of tasks	30 mins - 1 hour	11 - 30 commands	One activity	3 - 8 hours	No
dog457	Unhealthy	Female	112	8 - 10	50	20	Mixed	Neutered	No	30 mins - 1 hour	Over-weight (BCS 4-5)	Dry food only	Almost never	Yes	tooth problems	No	Female	40 - 49 years	I have had a dog before	None	One person	No	3 - 12 months	Found it/shelter	Urban/suburban apartment	4 or more kinds of tasks	>1 - 3 hours	11 - 30 commands	4 or more activities	More than 8 hours	Yes
dog459	Unhealthy	Female	109	8 - 10	33	9	Pure	Intact	Yes	>1 - 3 hours	Normal (BCS 3)	Raw food	Almost never	No	other disorders	No	Female	>50 years	I have had a dog before	Two or more	Two people	Yes	7 - 12 weeks	Born at my place/bought it	House with garden/non fenced area	2 kinds of tasks	30 mins - 1 hour	11 - 30 commands	One activity	3 - 8 hours	Yes
dog460	Unhealthy	Male	129	10 - 12	20	8	Pure	Neutered	Yes	>1 - 3 hours	Normal (BCS 3)	Mixed	Almost never	No	tooth problems	No	Female	40 - 49 years	Dogs are my hobby/profession	One	Two people	Yes	7 - 12 weeks	Got as a present	Urban/suburban apartment	4 or more kinds of tasks	>1 - 3 hours	>30 commands	One activity	3 - 8 hours	No
dog461	Healthy	Male	52	3 - 6	30	17	Mixed	Neutered	No	>1 - 3 hours	Thin (BCS 1-2)	Raw food	Almost never	No	None	No	Female	<29 years	I have had a dog before	One	Two people	No	7 - 12 weeks	Found it/shelter	Urban/suburban apartment	4 or more kinds of tasks	30 mins - 1 hour	11 - 30 commands	4 or more activities	3 - 8 hours	No
dog462	Unhealthy	Female	132	10 - 12	68	23	Pure	Neutered	No	>3 - 7 hours	Normal (BCS 3)	Tinned and dry food	Often	Yes	joint problems + tooth problems	No	Female	40 - 49 years	Dogs are my hobby/profession	One	Three people	Yes	More than a year	Found it/shelter	House with garden/non fenced area	4 or more kinds of tasks	>1 - 3 hours	<10 commands	2 - 3 activities	3 - 8 hours	Yes
dog463	Healthy	Male	135	10 - 12	50	7	Pure	Neutered	No	>1 - 3 hours	Normal (BCS 3)	Raw food	Almost never	No	None	No	Female	<29 years	I have had a dog before	One	Two people	No	More than a year	Found it/shelter	Urban/suburban apartment	4 or more kinds of tasks	>1 - 3 hours	<10 commands	2 - 3 activities	1 - 2 hours	No
dog464	Healthy	Male	21	1 - 3	55	10	Mixed	Neutered	No	>3 - 7 hours	Over-weight (BCS 4-5)	Raw food	Almost never	Yes	None	No	Female	<29 years	I have had a dog before	One	Two people	No	Less than 7 weeks	Got as a present	Urban/suburban apartment	4 or more kinds of tasks	>1 - 3 hours	<10 commands	4 or more activities	1 - 2 hours	No
dog465	Unhealthy	Female	121	10 - 12	40	13	Pure	Neutered	No	More than 7 hours	Over-weight (BCS 4-5)	Cooked food	Almost never	Yes	tooth problems	No	Female	40 - 49 years	I have had a dog before	Two or more	Three people	No	More than a year	Born at my place/bought it	Fenced garden	3 kinds of tasks	30 mins - 1 hour	<10 commands	2 - 3 activities	None	No
dog466	Unhealthy	Female	97	8 - 10	55	24	Pure	Intact	No	>1 - 3 hours	Thin (BCS 1-2)	Tinned and dry food	Almost never	Yes	tooth problems	No	Female	40 - 49 years	I have had a dog before	None	Three people	Yes	3 - 12 months	Got as a present	Urban/suburban apartment	4 or more kinds of tasks	>1 - 3 hours	11 - 30 commands	2 - 3 activities	3 - 8 hours	No
dog467	Unhealthy	Female	80	6 - 8	40	23	Mixed	Neutered	Yes	>1 - 3 hours	Normal (BCS 3)	Cooked food	Often	Yes	other disorders	Yes	Female	<29 years	I have had a dog before	One	Two people	No	More than a year	Found it/shelter	Urban/suburban apartment	4 or more kinds of tasks	more than 3 hours	11 - 30 commands	4 or more activities	3 - 8 hours	Yes
dog468	Healthy	Female	14	1 - 3	30	12	Pure	Intact	No	More than 7 hours	Normal (BCS 3)	Raw food	Rarely	No	None	No	Female	40 - 49 years	I have had a dog before	None	Two people	No	7 - 12 weeks	Born at my place/bought it	Fenced garden	4 or more kinds of tasks	>1 - 3 hours	<10 commands	4 or more activities	None	No
dog469	Unhealthy	Male	136	10 - 12	57	35	Pure	Intact	Yes	>1 - 3 hours	Normal (BCS 3)	Mixed	Rarely	No	other disorders	No	Female	<29 years	I have never had a dog before	One	Four or more people	No	7 - 12 weeks	Born at my place/bought it	Fenced garden	2 kinds of tasks	Less than 30 mins	<10 commands	One activity	3 - 8 hours	No
dog470	Unhealthy	Female	156	> 12	43	15	Mixed	Neutered	Yes	More than 7 hours	Normal (BCS 3)	Cooked food	Rarely	No	joint problems	No	Female	40 - 49 years	Dogs are my hobby/profession	One	Two people	No	3 - 12 months	Found it/shelter	House with garden/non fenced area	4 or more kinds of tasks	Less than 30 mins	11 - 30 commands	2 - 3 activities	More than 8 hours	No
dog471	Healthy	Male	70	3 - 6	30	16	Mixed	Neutered	No	30 mins - 1 hour	Normal (BCS 3)	Cooked food	Regularly (daily)	No	None	No	Female	30 - 39 years	Dogs are my hobby/profession	Two or more	Two people	No	7 - 12 weeks	Found it/shelter	Fenced garden	Maximum a task	Less than 30 mins	<10 commands	One activity	None	No
dog472	Unhealthy	Female	94	6 - 8	40	5	Pure	Neutered	No	30 mins - 1 hour	Normal (BCS 3)	Mixed	Often	No	other disorders	No	Female	<29 years	I have never had a dog before	One	Two people	No	7 - 12 weeks	Born at my place/bought it	Urban/suburban apartment	2 kinds of tasks	30 mins - 1 hour	<10 commands	2 - 3 activities	3 - 8 hours	No
dog473	Healthy	Male	109	8 - 10	55	38	Pure	Intact	No	>1 - 3 hours	Normal (BCS 3)	Tinned and dry food	Almost never	No	None	No	Female	30 - 39 years	Dogs are my hobby/profession	None	Two people	No	7 - 12 weeks	Born at my place/bought it	Fenced garden	2 kinds of tasks	Less than 30 mins	<10 commands	One activity	1 - 2 hours	No
dog475	Healthy	Male	133	10 - 12	35	17	Pure	Intact	No	More than 7 hours	Normal (BCS 3)	Mixed	Rarely	No	None	No	Female	<29 years	I have had a dog before	One	Four or more people	No	7 - 12 weeks	Born at my place/bought it	Fenced garden	3 kinds of tasks	30 mins - 1 hour	<10 commands	One activity	3 - 8 hours	Yes
dog476	Unhealthy	Male	78	6 - 8	45	23	Pure	Intact	No	>1 - 3 hours	Normal (BCS 3)	Mixed	Rarely	No	tooth problems	Yes	Female	<29 years	I have never had a dog before	One	Three people	No	7 - 12 weeks	Born at my place/bought it	Fenced garden	4 or more kinds of tasks	>1 - 3 hours	11 - 30 commands	4 or more activities	1 - 2 hours	No
dog477	Healthy	Female	13	1 - 3	50	32	Pure	Intact	No	30 mins - 1 hour	Over-weight (BCS 4-5)	Dry food only	Regularly (daily)	No	None	No	Female	<29 years	I have never had a dog before	None	Two people	No	7 - 12 weeks	Born at my place/bought it	Fenced garden	Maximum a task	Less than 30 mins	<10 commands	2 - 3 activities	3 - 8 hours	Yes
dog478	Healthy	Female	107	8 - 10	20	7	Pure	Neutered	No	Less than 30 mins	Normal (BCS 3)	Cooked food	Almost never	No	None	No	Female	>50 years	I have never had a dog before	None	Four or more people	No	3 - 12 months	Got as a present	Urban/suburban apartment	4 or more kinds of tasks	>1 - 3 hours	<10 commands	2 - 3 activities	1 - 2 hours	No
dog479	Unhealthy	Female	104	8 - 10	40	28	Mixed	Neutered	No	Less than 30 mins	Over-weight (BCS 4-5)	Dry food only	Regularly (daily)	No	joint problems	No	Female	30 - 39 years	I have had a dog before	None	Two people	No	More than a year	Got as a present	Urban/suburban apartment	Maximum a task	>1 - 3 hours	<10 commands	2 - 3 activities	3 - 8 hours	No
dog480	Unhealthy	Female	101	8 - 10	48	35	Pure	Intact	Yes	30 mins - 1 hour	Over-weight (BCS 4-5)	Mixed	Almost never	No	other disorders	No	Female	<29 years	Dogs are my hobby/profession	One	Four or more people	Yes	Less than 7 weeks	Born at my place/bought it	Fenced garden	2 kinds of tasks	30 mins - 1 hour	11 - 30 commands	One activity	None	No
dog481	Unhealthy	Female	77	6 - 8	35	5	Mixed	Neutered	No	Less than 30 mins	Normal (BCS 3)	Cooked food	Rarely	Yes	tooth problems	No	Female	<29 years	I have had a dog before	None	Two people	No	3 - 12 months	Found it/shelter	Urban/suburban apartment	4 or more kinds of tasks	Less than 30 mins	11 - 30 commands	4 or more activities	1 - 2 hours	Yes
dog482	Unhealthy	Male	121	10 - 12	20	3	Pure	Intact	No	>1 - 3 hours	Normal (BCS 3)	Cooked food	Often	Yes	joint problems + tooth problems	No	Female	30 - 39 years	I have had a dog before	One	Two people	No	3 - 12 months	Got as a present	Fenced garden	3 kinds of tasks	>1 - 3 hours	<10 commands	One activity	1 - 2 hours	No
dog483	Unhealthy	Male	150	> 12	50	25	Mixed	Intact	Yes	Less than 30 mins	Thin (BCS 1-2)	Mixed	Almost never	No	joint problems	No	Female	<29 years	I have had a dog before	One	Two people	No	7 - 12 weeks	Born at my place/bought it	Fenced garden	3 kinds of tasks	Less than 30 mins	11 - 30 commands	One activity	1 - 2 hours	Yes
dog484	Unhealthy	Male	66	3 - 6	25	5	Pure	Intact	No	Less than 30 mins	Normal (BCS 3)	Tinned and dry food	Regularly (daily)	No	tooth problems	No	Female	40 - 49 years	I have never had a dog before	One	One person	No	7 - 12 weeks	Born at my place/bought it	Urban/suburban apartment	4 or more kinds of tasks	more than 3 hours	11 - 30 commands	2 - 3 activities	3 - 8 hours	No
dog485	Unhealthy	Female	147	> 12	29	4	Pure	Neutered	No	>1 - 3 hours	Normal (BCS 3)	Dry food only	Almost never	Yes	joint problems + tooth problems	No	Female	40 - 49 years	I have never had a dog before	Two or more	Two people	No	Less than 7 weeks	Got as a present	Urban/suburban apartment	3 kinds of tasks	30 mins - 1 hour	<10 commands	2 - 3 activities	1 - 2 hours	No
dog486	Unhealthy	Male	32	1 - 3	35	28	Pure	Intact	No	More than 7 hours	Normal (BCS 3)	Dry food only	Regularly (daily)	No	joint problems	No	Female	30 - 39 years	I have never had a dog before	One	Two people	No	Less than 7 weeks	Born at my place/bought it	Fenced garden	4 or more kinds of tasks	more than 3 hours	<10 commands	2 - 3 activities	3 - 8 hours	No
dog487	Unhealthy	Male	64	3 - 6	55	40	Pure	Neutered	No	Less than 30 mins	Normal (BCS 3)	Cooked food	Often	Yes	other disorders	Yes	Female	30 - 39 years	I have had a dog before	None	Three people	No	3 - 12 months	Got as a present	Urban/suburban apartment	3 kinds of tasks	>1 - 3 hours	11 - 30 commands	4 or more activities	None	Yes
dog488	Unhealthy	Female	72	6 - 8	50	24	Pure	Neutered	No	>1 - 3 hours	Normal (BCS 3)	Tinned and dry food	Rarely	No	other disorders	No	Female	30 - 39 years	I have had a dog before	Two or more	Three people	Yes	7 - 12 weeks	Born at my place/bought it	Urban/suburban apartment	4 or more kinds of tasks	>1 - 3 hours	<10 commands	One activity	1 - 2 hours	No
dog489	Healthy	Female	47	3 - 6	55	30	Pure	Intact	No	>1 - 3 hours	Over-weight (BCS 4-5)	Dry food only	Regularly (daily)	No	None	No	Female	40 - 49 years	Dogs are my hobby/profession	One	Four or more people	Yes	7 - 12 weeks	Born at my place/bought it	Urban/suburban apartment	4 or more kinds of tasks	30 mins - 1 hour	>30 commands	2 - 3 activities	3 - 8 hours	No
dog490	Healthy	Female	26	1 - 3	53	25	Pure	Neutered	No	30 mins - 1 hour	Normal (BCS 3)	Cooked food	Almost never	No	None	No	Female	<29 years	I have had a dog before	None	Two people	No	7 - 12 weeks	Born at my place/bought it	Urban/suburban apartment	4 or more kinds of tasks	>1 - 3 hours	11 - 30 commands	4 or more activities	3 - 8 hours	No
dog492	Healthy	Male	16	1 - 3	80	40	Mixed	Intact	No	More than 7 hours	Normal (BCS 3)	Raw food	Often	No	None	No	Female	<29 years	Dogs are my hobby/profession	None	Four or more people	No	7 - 12 weeks	Born at my place/bought it	Fenced garden	3 kinds of tasks	Less than 30 mins	<10 commands	2 - 3 activities	More than 8 hours	No
dog493	Unhealthy	Female	71	3 - 6	30	8	Pure	Neutered	No	Less than 30 mins	Over-weight (BCS 4-5)	Dry food only	Often	Yes	joint problems	No	Female	30 - 39 years	I have had a dog before	Two or more	Two people	No	More than a year	Found it/shelter	Urban/suburban apartment	Maximum a task	>1 - 3 hours	<10 commands	One activity	More than 8 hours	No
dog494	Unhealthy	Male	61	3 - 6	57	25	Mixed	Intact	No	More than 7 hours	Normal (BCS 3)	Mixed	Rarely	Yes	other disorders	No	Male	30 - 39 years	I have had a dog before	None	Three people	No	3 - 12 months	Found it/shelter	Fenced garden	2 kinds of tasks	30 mins - 1 hour	<10 commands	One activity	None	No
dog495	Unhealthy	Female	108	8 - 10	30	6	Mixed	Neutered	No	>1 - 3 hours	Normal (BCS 3)	Mixed	Rarely	Yes	joint problems	No	Female	30 - 39 years	Dogs are my hobby/profession	One	Two people	No	Less than 7 weeks	Found it/shelter	Urban/suburban apartment	4 or more kinds of tasks	30 mins - 1 hour	11 - 30 commands	4 or more activities	3 - 8 hours	No
dog497	Healthy	Male	29	1 - 3	55	40	Mixed	Intact	No	30 mins - 1 hour	Over-weight (BCS 4-5)	Mixed	Rarely	No	None	No	Female	<29 years	I have had a dog before	None	Four or more people	No	7 - 12 weeks	Got as a present	Urban/suburban apartment	3 kinds of tasks	30 mins - 1 hour	<10 commands	One activity	3 - 8 hours	No
dog498	Unhealthy	Female	83	6 - 8	33	7	Pure	Intact	No	More than 7 hours	Normal (BCS 3)	Dry food only	Regularly (daily)	No	tooth problems	No	Female	<29 years	Dogs are my hobby/profession	Two or more	Three people	No	7 - 12 weeks	Born at my place/bought it	Fenced garden	4 or more kinds of tasks	>1 - 3 hours	11 - 30 commands	2 - 3 activities	3 - 8 hours	No
dog499	Unhealthy	Female	120	10 - 12	43	9	Mixed	Neutered	No	>3 - 7 hours	Normal (BCS 3)	Dry food only	Rarely	Yes	other disorders	No	Female	<29 years	Dogs are my hobby/profession	Two or more	Three people	No	Less than 7 weeks	Found it/shelter	House with garden/non fenced area	4 or more kinds of tasks	>1 - 3 hours	>30 commands	2 - 3 activities	More than 8 hours	Yes
dog500	Unhealthy	Female	96	8 - 10	60	40	Pure	Intact	Yes	More than 7 hours	Normal (BCS 3)	Mixed	Almost never	Yes	other disorders	Yes	Female	40 - 49 years	I have had a dog before	None	Two people	No	More than a year	Got as a present	Urban/suburban apartment	3 kinds of tasks	Less than 30 mins	11 - 30 commands	One activity	More than 8 hours	No
dog501	Healthy	Female	13	1 - 3	55	30	Pure	Intact	No	More than 7 hours	Normal (BCS 3)	Dry food only	Almost never	No	None	No	Female	<29 years	I have never had a dog before	One	One person	No	7 - 12 weeks	Born at my place/bought it	Fenced garden	4 or more kinds of tasks	30 mins - 1 hour	<10 commands	One activity	3 - 8 hours	No
dog502	Healthy	Female	106	8 - 10	27	19	Mixed	Neutered	No	30 mins - 1 hour	Normal (BCS 3)	Cooked food	Rarely	Yes	None	No	Female	40 - 49 years	I have had a dog before	None	Two people	No	Less than 7 weeks	Found it/shelter	Urban/suburban apartment	4 or more kinds of tasks	more than 3 hours	11 - 30 commands	2 - 3 activities	More than 8 hours	No
dog503	Healthy	Male	32	1 - 3	40	15	Pure	Intact	No	>3 - 7 hours	Normal (BCS 3)	Tinned and dry food	Rarely	No	None	No	Female	30 - 39 years	I have never had a dog before	None	Three people	Yes	3 - 12 months	Got as a present	Urban/suburban apartment	4 or more kinds of tasks	more than 3 hours	11 - 30 commands	4 or more activities	3 - 8 hours	No
dog504	Unhealthy	Male	72	6 - 8	50	6	Pure	Intact	No	>1 - 3 hours	Normal (BCS 3)	Tinned and dry food	Often	No	other disorders	No	Female	30 - 39 years	I have had a dog before	None	Four or more people	No	7 - 12 weeks	Born at my place/bought it	Urban/suburban apartment	4 or more kinds of tasks	more than 3 hours	11 - 30 commands	One activity	3 - 8 hours	No
dog505	Unhealthy	Female	136	10 - 12	57	29	Pure	Neutered	No	30 mins - 1 hour	Over-weight (BCS 4-5)	Tinned and dry food	Often	No	joint problems	Yes	Female	<29 years	Dogs are my hobby/profession	One	Four or more people	No	7 - 12 weeks	Born at my place/bought it	Fenced garden	4 or more kinds of tasks	>1 - 3 hours	11 - 30 commands	4 or more activities	1 - 2 hours	No
dog506	Unhealthy	Male	18	1 - 3	30	7	Pure	Neutered	No	30 mins - 1 hour	Thin (BCS 1-2)	Dry food only	Often	Yes	joint problems	No	Female	<29 years	I have never had a dog before	Two or more	One person	No	7 - 12 weeks	Born at my place/bought it	Urban/suburban apartment	4 or more kinds of tasks	30 mins - 1 hour	<10 commands	4 or more activities	More than 8 hours	Yes
dog507	Healthy	Male	56	3 - 6	20	3	Pure	Neutered	No	>1 - 3 hours	Normal (BCS 3)	Dry food only	Often	No	None	No	Female	<29 years	I have had a dog before	One	Two people	No	Less than 7 weeks	Born at my place/bought it	Urban/suburban apartment	4 or more kinds of tasks	30 mins - 1 hour	<10 commands	2 - 3 activities	None	No
dog508	Unhealthy	Male	89	6 - 8	58	21	Pure	Neutered	No	>1 - 3 hours	Thin (BCS 1-2)	Raw food	Almost never	Yes	joint problems	No	Female	<29 years	I have never had a dog before	One	Four or more people	Yes	3 - 12 months	Got as a present	Urban/suburban apartment	3 kinds of tasks	more than 3 hours	>30 commands	4 or more activities	3 - 8 hours	No
dog510	Healthy	Male	13	1 - 3	20	5	Mixed	Intact	No	30 mins - 1 hour	Thin (BCS 1-2)	Cooked food	Often	Yes	None	No	Female	30 - 39 years	I have had a dog before	None	Two people	No	7 - 12 weeks	Born at my place/bought it	House with garden/non fenced area	4 or more kinds of tasks	>1 - 3 hours	>30 commands	4 or more activities	3 - 8 hours	Yes
dog511	Healthy	Male	31	1 - 3	50	35	Pure	Intact	No	>3 - 7 hours	Normal (BCS 3)	Cooked food	Almost never	Yes	None	No	Female	30 - 39 years	I have had a dog before	One	Two people	No	3 - 12 months	Born at my place/bought it	Fenced garden	2 kinds of tasks	>1 - 3 hours	11 - 30 commands	2 - 3 activities	None	No
dog512	Unhealthy	Male	151	> 12	30	10	Mixed	Intact	No	>3 - 7 hours	Normal (BCS 3)	Mixed	Rarely	No	other disorders	No	Female	<29 years	Dogs are my hobby/profession	None	Four or more people	No	7 - 12 weeks	Got as a present	Fenced garden	4 or more kinds of tasks	30 mins - 1 hour	<10 commands	2 - 3 activities	3 - 8 hours	No
dog514	Unhealthy	Male	186	> 12	50	15	Mixed	Intact	Yes	>3 - 7 hours	Normal (BCS 3)	Mixed	Almost never	Yes	joint problems + tooth problems	No	Female	<29 years	I have had a dog before	One	Two people	No	More than a year	Got as a present	Fenced garden	2 kinds of tasks	30 mins - 1 hour	<10 commands	2 - 3 activities	3 - 8 hours	Yes
dog515	Healthy	Female	40	3 - 6	25	7	Pure	Neutered	No	>1 - 3 hours	Normal (BCS 3)	Tinned and dry food	Rarely	No	None	No	Female	<29 years	I have never had a dog before	None	Four or more people	No	3 - 12 months	Born at my place/bought it	Urban/suburban apartment	3 kinds of tasks	more than 3 hours	<10 commands	One activity	None	No
dog516	Healthy	Male	24	1 - 3	20	2	Pure	Intact	No	30 mins - 1 hour	Normal (BCS 3)	Dry food only	Regularly (daily)	No	None	No	Male	<29 years	I have never had a dog before	One	Two people	No	Less than 7 weeks	Born at my place/bought it	Urban/suburban apartment	4 or more kinds of tasks	>1 - 3 hours	<10 commands	2 - 3 activities	3 - 8 hours	No
dog517	Healthy	Female	98	8 - 10	55	28	Mixed	Intact	No	>1 - 3 hours	Normal (BCS 3)	Cooked food	Rarely	No	None	No	Female	<29 years	I have had a dog before	One	Three people	No	3 - 12 months	Got as a present	Urban/suburban apartment	4 or more kinds of tasks	>1 - 3 hours	11 - 30 commands	2 - 3 activities	3 - 8 hours	No
dog518	Unhealthy	Female	50	3 - 6	40	35	Pure	Neutered	Yes	More than 7 hours	Over-weight (BCS 4-5)	Cooked food	Almost never	Yes	other disorders	No	Female	40 - 49 years	I have had a dog before	One	One person	No	7 - 12 weeks	Born at my place/bought it	Urban/suburban apartment	4 or more kinds of tasks	Less than 30 mins	11 - 30 commands	One activity	3 - 8 hours	No
dog519	Unhealthy	Female	63	3 - 6	40	4	Pure	Intact	No	Less than 30 mins	Thin (BCS 1-2)	Dry food only	Regularly (daily)	Yes	joint problems	Yes	Female	30 - 39 years	Dogs are my hobby/profession	One	Two people	No	3 - 12 months	Born at my place/bought it	Urban/suburban apartment	3 kinds of tasks	30 mins - 1 hour	11 - 30 commands	2 - 3 activities	3 - 8 hours	No
dog520	Healthy	Male	42	3 - 6	50	27	Pure	Intact	No	Less than 30 mins	Thin (BCS 1-2)	Dry food only	Almost never	No	None	No	Male	30 - 39 years	Dogs are my hobby/profession	One	Two people	No	7 - 12 weeks	Born at my place/bought it	Urban/suburban apartment	4 or more kinds of tasks	30 mins - 1 hour	>30 commands	4 or more activities	3 - 8 hours	No
dog521	Healthy	Male	28	1 - 3	27	3	Pure	Intact	No	>3 - 7 hours	Normal (BCS 3)	Tinned and dry food	Almost never	No	None	No	Female	<29 years	I have had a dog before	One	Four or more people	No	3 - 12 months	Born at my place/bought it	Urban/suburban apartment	2 kinds of tasks	>1 - 3 hours	<10 commands	One activity	1 - 2 hours	No
dog522	Healthy	Male	120	10 - 12	40	25	Mixed	Intact	No	More than 7 hours	Thin (BCS 1-2)	Mixed	Almost never	No	None	No	Male	>50 years	Dogs are my hobby/profession	One	Two people	No	Less than 7 weeks	Found it/shelter	Fenced garden	4 or more kinds of tasks	>1 - 3 hours	11 - 30 commands	4 or more activities	None	Yes
dog524	Unhealthy	Female	98	8 - 10	40	45	Mixed	Neutered	No	Less than 30 mins	Over-weight (BCS 4-5)	Cooked food	Regularly (daily)	Yes	tooth problems	No	Female	>50 years	I have had a dog before	Two or more	Two people	No	More than a year	Found it/shelter	Urban/suburban apartment	3 kinds of tasks	30 mins - 1 hour	11 - 30 commands	One activity	3 - 8 hours	No
dog525	Unhealthy	Female	45	3 - 6	78	50	Pure	Intact	No	>1 - 3 hours	Thin (BCS 1-2)	Dry food only	Rarely	Yes	tooth problems	No	Female	40 - 49 years	Dogs are my hobby/profession	One	Two people	No	7 - 12 weeks	Born at my place/bought it	Urban/suburban apartment	4 or more kinds of tasks	>1 - 3 hours	>30 commands	4 or more activities	More than 8 hours	No
dog526	Healthy	Male	42	3 - 6	30	5	Pure	Intact	No	30 mins - 1 hour	Normal (BCS 3)	Cooked food	Almost never	No	None	Yes	Female	40 - 49 years	I have never had a dog before	One	Two people	No	7 - 12 weeks	Born at my place/bought it	Urban/suburban apartment	2 kinds of tasks	>1 - 3 hours	<10 commands	4 or more activities	1 - 2 hours	Yes
dog527	Healthy	Male	30	1 - 3	50	13	Mixed	Neutered	No	30 mins - 1 hour	Thin (BCS 1-2)	Dry food only	Almost never	Yes	None	No	Female	<29 years	I have never had a dog before	None	Four or more people	Yes	3 - 12 months	Found it/shelter	Urban/suburban apartment	4 or more kinds of tasks	>1 - 3 hours	11 - 30 commands	4 or more activities	1 - 2 hours	No
dog528	Unhealthy	Male	185	> 12	60	25	Mixed	Intact	Yes	30 mins - 1 hour	Over-weight (BCS 4-5)	Mixed	Often	Yes	joint problems + tooth problems	No	Female	<29 years	I have never had a dog before	One	Three people	No	3 - 12 months	Found it/shelter	Urban/suburban apartment	Maximum a task	30 mins - 1 hour	<10 commands	One activity	3 - 8 hours	No
dog530	Healthy	Female	45	3 - 6	50	30	Pure	Intact	No	More than 7 hours	Normal (BCS 3)	Mixed	Rarely	No	None	Yes	Female	<29 years	I have had a dog before	None	Four or more people	No	7 - 12 weeks	Born at my place/bought it	Urban/suburban apartment	3 kinds of tasks	30 mins - 1 hour	11 - 30 commands	2 - 3 activities	3 - 8 hours	No
dog531	Healthy	Female	26	1 - 3	40	12	Mixed	Intact	No	>1 - 3 hours	Thin (BCS 1-2)	Cooked food	Almost never	No	None	No	Female	<29 years	I have had a dog before	None	Four or more people	No	3 - 12 months	Found it/shelter	Urban/suburban apartment	4 or more kinds of tasks	>1 - 3 hours	<10 commands	4 or more activities	3 - 8 hours	Yes
dog532	Healthy	Female	52	3 - 6	32	12	Pure	Neutered	No	30 mins - 1 hour	Normal (BCS 3)	Cooked food	Almost never	No	None	No	Female	<29 years	I have never had a dog before	None	Two people	No	More than a year	Found it/shelter	Urban/suburban apartment	4 or more kinds of tasks	more than 3 hours	11 - 30 commands	4 or more activities	3 - 8 hours	No
dog533	Unhealthy	Female	97	8 - 10	25	6	Pure	Intact	No	>3 - 7 hours	Normal (BCS 3)	Dry food only	Rarely	Yes	joint problems	No	Female	<29 years	I have never had a dog before	One	Four or more people	No	7 - 12 weeks	Born at my place/bought it	House with garden/non fenced area	4 or more kinds of tasks	>1 - 3 hours	11 - 30 commands	2 - 3 activities	3 - 8 hours	No
dog534	Unhealthy	Male	12	1 - 3	55	18	Pure	Neutered	No	>1 - 3 hours	Thin (BCS 1-2)	Raw food	Often	Yes	other disorders	No	Female	<29 years	Dogs are my hobby/profession	One	Two people	No	7 - 12 weeks	Born at my place/bought it	Urban/suburban apartment	4 or more kinds of tasks	>1 - 3 hours	>30 commands	4 or more activities	1 - 2 hours	Yes
dog535	Healthy	Female	61	3 - 6	25	6	Mixed	Neutered	No	30 mins - 1 hour	Over-weight (BCS 4-5)	Tinned and dry food	Rarely	No	None	No	Female	40 - 49 years	I have never had a dog before	None	Two people	No	Less than 7 weeks	Born at my place/bought it	Urban/suburban apartment	2 kinds of tasks	>1 - 3 hours	<10 commands	One activity	None	No
dog536	Healthy	Male	30	1 - 3	62	25	Mixed	Intact	No	30 mins - 1 hour	Normal (BCS 3)	Raw food	Regularly (daily)	Yes	None	No	Female	30 - 39 years	I have had a dog before	None	Four or more people	Yes	3 - 12 months	Found it/shelter	Urban/suburban apartment	4 or more kinds of tasks	30 mins - 1 hour	11 - 30 commands	4 or more activities	3 - 8 hours	No
dog537	Healthy	Female	46	3 - 6	81	52	Pure	Intact	No	>1 - 3 hours	Normal (BCS 3)	Dry food only	Often	No	None	No	Male	40 - 49 years	I have had a dog before	None	Two people	No	7 - 12 weeks	Born at my place/bought it	House with garden/non fenced area	4 or more kinds of tasks	>1 - 3 hours	>30 commands	4 or more activities	More than 8 hours	No
dog538	Unhealthy	Male	161	> 12	50	15	Mixed	Intact	Yes	More than 7 hours	Normal (BCS 3)	Mixed	Rarely	Yes	joint problems + tooth problems	No	Male	>50 years	I have had a dog before	Two or more	Three people	Yes	3 - 12 months	Found it/shelter	Fenced garden	Maximum a task	Less than 30 mins	<10 commands	One activity	None	Yes
dog539	Unhealthy	Male	169	> 12	60	40	Pure	Intact	Yes	Less than 30 mins	Thin (BCS 1-2)	Cooked food	Often	No	joint problems + tooth problems	Yes	Female	<29 years	I have had a dog before	None	Four or more people	No	7 - 12 weeks	Got as a present	Fenced garden	2 kinds of tasks	30 mins - 1 hour	<10 commands	2 - 3 activities	3 - 8 hours	No
dog540	Unhealthy	Male	85	6 - 8	56	48	Mixed	Intact	Yes	30 mins - 1 hour	Normal (BCS 3)	Mixed	Regularly (daily)	Yes	other disorders	No	Female	40 - 49 years	I have had a dog before	None	Two people	No	Less than 7 weeks	Got as a present	House with garden/non fenced area	3 kinds of tasks	30 mins - 1 hour	11 - 30 commands	2 - 3 activities	1 - 2 hours	No
dog541	Healthy	Female	110	8 - 10	60	21	Pure	Neutered	No	>1 - 3 hours	Thin (BCS 1-2)	Cooked food	Rarely	No	None	No	Female	>50 years	Dogs are my hobby/profession	Two or more	Two people	No	More than a year	Got as a present	House with garden/non fenced area	3 kinds of tasks	>1 - 3 hours	11 - 30 commands	2 - 3 activities	None	No
dog542	Unhealthy	Female	84	6 - 8	65	28	Pure	Neutered	No	More than 7 hours	Normal (BCS 3)	Raw food	Often	No	other disorders	No	Female	40 - 49 years	Dogs are my hobby/profession	Two or more	One person	No	7 - 12 weeks	Born at my place/bought it	House with garden/non fenced area	4 or more kinds of tasks	30 mins - 1 hour	11 - 30 commands	One activity	1 - 2 hours	No
dog543	Healthy	Female	72	6 - 8	46	32	Mixed	Neutered	No	More than 7 hours	Over-weight (BCS 4-5)	Dry food only	Often	Yes	None	No	Male	>50 years	I have had a dog before	None	Two people	No	7 - 12 weeks	Got as a present	Fenced garden	Maximum a task	Less than 30 mins	<10 commands	One activity	3 - 8 hours	No
dog544	Unhealthy	Female	91	6 - 8	30	6	Pure	Intact	No	Less than 30 mins	Normal (BCS 3)	Dry food only	Rarely	No	joint problems	No	Female	40 - 49 years	Dogs are my hobby/profession	One	Two people	No	3 - 12 months	Born at my place/bought it	Urban/suburban apartment	3 kinds of tasks	>1 - 3 hours	11 - 30 commands	2 - 3 activities	1 - 2 hours	No
dog545	Healthy	Female	40	3 - 6	40	15	Pure	Intact	No	30 mins - 1 hour	Normal (BCS 3)	Mixed	Rarely	No	None	No	Female	<29 years	I have had a dog before	One	Four or more people	No	Less than 7 weeks	Got as a present	Fenced garden	4 or more kinds of tasks	Less than 30 mins	<10 commands	One activity	More than 8 hours	No
dog546	Healthy	Male	53	3 - 6	30	28	Pure	Intact	No	More than 7 hours	Normal (BCS 3)	Cooked food	Almost never	No	None	No	Female	40 - 49 years	I have had a dog before	None	Four or more people	Yes	Less than 7 weeks	Found it/shelter	Fenced garden	4 or more kinds of tasks	>1 - 3 hours	11 - 30 commands	2 - 3 activities	3 - 8 hours	No
dog547	Healthy	Female	70	3 - 6	52	33	Pure	Neutered	No	>1 - 3 hours	Normal (BCS 3)	Mixed	Rarely	No	None	No	Female	30 - 39 years	I have had a dog before	None	Two people	No	7 - 12 weeks	Born at my place/bought it	Fenced garden	4 or more kinds of tasks	30 mins - 1 hour	11 - 30 commands	4 or more activities	3 - 8 hours	No
dog548	Unhealthy	Male	37	3 - 6	30	4	Pure	Intact	No	30 mins - 1 hour	Normal (BCS 3)	Tinned and dry food	Often	No	joint problems + tooth problems	No	Female	30 - 39 years	I have had a dog before	None	Three people	Yes	7 - 12 weeks	Born at my place/bought it	Urban/suburban apartment	3 kinds of tasks	30 mins - 1 hour	<10 commands	2 - 3 activities	1 - 2 hours	No
dog549	Unhealthy	Male	110	8 - 10	24	7	Pure	Intact	No	>3 - 7 hours	Normal (BCS 3)	Tinned and dry food	Almost never	No	tooth problems	No	Female	40 - 49 years	Dogs are my hobby/profession	One	Two people	No	Less than 7 weeks	Got as a present	Urban/suburban apartment	4 or more kinds of tasks	more than 3 hours	11 - 30 commands	2 - 3 activities	1 - 2 hours	No
dog551	Healthy	Male	68	3 - 6	55	22	Mixed	Neutered	No	>1 - 3 hours	Normal (BCS 3)	Cooked food	Almost never	Yes	None	No	Female	40 - 49 years	I have had a dog before	One	One person	No	3 - 12 months	Found it/shelter	Urban/suburban apartment	4 or more kinds of tasks	>1 - 3 hours	11 - 30 commands	2 - 3 activities	3 - 8 hours	No
dog552	Healthy	Male	36	3 - 6	20	8	Mixed	Neutered	No	>1 - 3 hours	Normal (BCS 3)	Cooked food	Almost never	No	None	No	Female	<29 years	I have had a dog before	Two or more	Three people	No	More than a year	Found it/shelter	Urban/suburban apartment	4 or more kinds of tasks	>1 - 3 hours	11 - 30 commands	4 or more activities	None	Yes
dog553	Unhealthy	Male	12	1 - 3	15	4	Mixed	Neutered	Yes	Less than 30 mins	Normal (BCS 3)	Tinned and dry food	Almost never	No	other disorders	No	Female	<29 years	Dogs are my hobby/profession	Two or more	Three people	No	7 - 12 weeks	Got as a present	Urban/suburban apartment	2 kinds of tasks	30 mins - 1 hour	<10 commands	One activity	None	Yes
dog554	Unhealthy	Female	33	1 - 3	14	6	Mixed	Neutered	Yes	30 mins - 1 hour	Normal (BCS 3)	Cooked food	Almost never	Yes	other disorders	No	Female	<29 years	Dogs are my hobby/profession	Two or more	Three people	No	More than a year	Found it/shelter	Urban/suburban apartment	Maximum a task	>1 - 3 hours	<10 commands	One activity	None	Yes
dog555	Unhealthy	Female	145	> 12	25	12	Pure	Neutered	No	>1 - 3 hours	Over-weight (BCS 4-5)	Raw food	Almost never	No	tooth problems	No	Female	<29 years	I have never had a dog before	None	Three people	No	7 - 12 weeks	Got as a present	Fenced garden	2 kinds of tasks	>1 - 3 hours	<10 commands	4 or more activities	3 - 8 hours	Yes
dog556	Unhealthy	Male	133	10 - 12	50	25	Mixed	Intact	No	More than 7 hours	Normal (BCS 3)	Cooked food	Rarely	No	joint problems	No	Male	30 - 39 years	I have never had a dog before	Two or more	Two people	No	Less than 7 weeks	Born at my place/bought it	Fenced garden	Maximum a task	more than 3 hours	11 - 30 commands	One activity	None	No
dog557	Unhealthy	Male	145	> 12	40	24	Pure	Intact	Yes	>1 - 3 hours	Normal (BCS 3)	Cooked food	Almost never	No	other disorders	No	Female	>50 years	I have never had a dog before	None	Three people	No	7 - 12 weeks	Got as a present	House with garden/non fenced area	4 or more kinds of tasks	30 mins - 1 hour	>30 commands	One activity	None	Yes
dog558	Healthy	Male	94	6 - 8	26	6	Pure	Intact	No	More than 7 hours	Normal (BCS 3)	Dry food only	Rarely	Yes	None	No	Female	40 - 49 years	I have had a dog before	Two or more	Two people	No	7 - 12 weeks	Born at my place/bought it	Fenced garden	2 kinds of tasks	Less than 30 mins	<10 commands	One activity	3 - 8 hours	No
dog559	Unhealthy	Female	29	1 - 3	60	28	Pure	Neutered	No	More than 7 hours	Normal (BCS 3)	Mixed	Rarely	No	other disorders	No	Female	30 - 39 years	I have had a dog before	Two or more	Four or more people	No	7 - 12 weeks	Born at my place/bought it	Fenced garden	4 or more kinds of tasks	>1 - 3 hours	>30 commands	4 or more activities	3 - 8 hours	No
dog560	Healthy	Female	136	10 - 12	50	12	Mixed	Neutered	No	More than 7 hours	Normal (BCS 3)	Mixed	Almost never	Yes	None	No	Female	40 - 49 years	I have never had a dog before	One	Four or more people	Yes	7 - 12 weeks	Found it/shelter	Fenced garden	4 or more kinds of tasks	30 mins - 1 hour	<10 commands	One activity	None	No
dog561	Healthy	Male	17	1 - 3	42	31	Pure	Intact	No	>1 - 3 hours	Normal (BCS 3)	Mixed	Rarely	No	None	No	Male	<29 years	I have had a dog before	None	Two people	No	Less than 7 weeks	Got as a present	Fenced garden	3 kinds of tasks	>1 - 3 hours	<10 commands	4 or more activities	3 - 8 hours	Yes
dog562	Unhealthy	Male	52	3 - 6	35	6	Pure	Intact	Yes	30 mins - 1 hour	Normal (BCS 3)	Dry food only	Regularly (daily)	Yes	other disorders	No	Female	<29 years	I have never had a dog before	One	Three people	Yes	7 - 12 weeks	Born at my place/bought it	Urban/suburban apartment	2 kinds of tasks	more than 3 hours	<10 commands	4 or more activities	3 - 8 hours	No
dog564	Unhealthy	Male	196	> 12	20	8	Mixed	Intact	Yes	Less than 30 mins	Normal (BCS 3)	Tinned and dry food	Often	No	joint problems + tooth problems	No	Female	>50 years	I have had a dog before	None	Two people	No	3 - 12 months	Found it/shelter	House with garden/non fenced area	Maximum a task	more than 3 hours	11 - 30 commands	2 - 3 activities	1 - 2 hours	Yes
dog565	Unhealthy	Male	149	> 12	44	16	Pure	Neutered	Yes	>3 - 7 hours	Normal (BCS 3)	Dry food only	Regularly (daily)	No	joint problems	No	Female	30 - 39 years	Dogs are my hobby/profession	Two or more	Two people	No	7 - 12 weeks	Born at my place/bought it	House with garden/non fenced area	4 or more kinds of tasks	30 mins - 1 hour	<10 commands	One activity	3 - 8 hours	Yes
dog566	Unhealthy	Male	53	3 - 6	30	14	Pure	Intact	No	>3 - 7 hours	Normal (BCS 3)	Cooked food	Rarely	Yes	joint problems + tooth problems	No	Female	>50 years	I have had a dog before	One	One person	No	3 - 12 months	Got as a present	Urban/suburban apartment	3 kinds of tasks	more than 3 hours	11 - 30 commands	2 - 3 activities	3 - 8 hours	No
dog567	Healthy	Male	62	3 - 6	74	40	Pure	Intact	No	>1 - 3 hours	Normal (BCS 3)	Raw food	Rarely	Yes	None	No	Male	40 - 49 years	Dogs are my hobby/profession	Two or more	Four or more people	Yes	More than a year	Got as a present	Fenced garden	2 kinds of tasks	30 mins - 1 hour	<10 commands	2 - 3 activities	3 - 8 hours	No
dog568	Unhealthy	Female	27	1 - 3	55	6	Pure	Intact	No	>3 - 7 hours	Normal (BCS 3)	Cooked food	Rarely	Yes	other disorders	No	Female	<29 years	I have never had a dog before	One	Four or more people	No	3 - 12 months	Found it/shelter	Urban/suburban apartment	2 kinds of tasks	>1 - 3 hours	<10 commands	2 - 3 activities	1 - 2 hours	Yes
dog569	Healthy	Female	50	3 - 6	50	27	Pure	Intact	No	>1 - 3 hours	Normal (BCS 3)	Mixed	Rarely	No	None	No	Female	40 - 49 years	Dogs are my hobby/profession	One	Two people	No	7 - 12 weeks	Born at my place/bought it	House with garden/non fenced area	3 kinds of tasks	>1 - 3 hours	11 - 30 commands	2 - 3 activities	3 - 8 hours	No
dog570	Unhealthy	Female	120	10 - 12	40	10	Pure	Neutered	Yes	>3 - 7 hours	Normal (BCS 3)	Tinned and dry food	Regularly (daily)	Yes	other disorders	Yes	Female	30 - 39 years	I have had a dog before	Two or more	Two people	No	More than a year	Found it/shelter	House with garden/non fenced area	2 kinds of tasks	30 mins - 1 hour	<10 commands	One activity	3 - 8 hours	Yes
dog571	Unhealthy	Male	110	8 - 10	26	10	Pure	Intact	No	>1 - 3 hours	Normal (BCS 3)	Cooked food	Often	No	joint problems	No	Female	30 - 39 years	I have had a dog before	One	Two people	No	7 - 12 weeks	Born at my place/bought it	Urban/suburban apartment	4 or more kinds of tasks	>1 - 3 hours	<10 commands	One activity	None	No
dog572	Unhealthy	Female	38	3 - 6	55	27	Pure	Intact	No	>1 - 3 hours	Thin (BCS 1-2)	Dry food only	Rarely	No	tooth problems	No	Female	40 - 49 years	Dogs are my hobby/profession	One	Two people	No	7 - 12 weeks	Born at my place/bought it	House with garden/non fenced area	4 or more kinds of tasks	>1 - 3 hours	11 - 30 commands	2 - 3 activities	3 - 8 hours	No
dog573	Healthy	Male	93	6 - 8	25	5	Pure	Neutered	No	30 mins - 1 hour	Normal (BCS 3)	Cooked food	Rarely	No	None	No	Female	<29 years	I have had a dog before	None	Two people	No	7 - 12 weeks	Born at my place/bought it	House with garden/non fenced area	2 kinds of tasks	30 mins - 1 hour	<10 commands	2 - 3 activities	3 - 8 hours	No
dog574	Unhealthy	Male	143	10 - 12	30	12	Pure	Neutered	No	>3 - 7 hours	Normal (BCS 3)	Cooked food	Almost never	No	joint problems + tooth problems	No	Female	>50 years	I have had a dog before	None	Two people	No	7 - 12 weeks	Born at my place/bought it	Urban/suburban apartment	4 or more kinds of tasks	more than 3 hours	>30 commands	2 - 3 activities	None	No
dog575	Unhealthy	Female	106	8 - 10	45	24	Mixed	Neutered	No	>1 - 3 hours	Normal (BCS 3)	Cooked food	Regularly (daily)	No	other disorders	Yes	Female	30 - 39 years	Dogs are my hobby/profession	Two or more	Three people	No	Less than 7 weeks	Found it/shelter	Urban/suburban apartment	2 kinds of tasks	>1 - 3 hours	<10 commands	One activity	3 - 8 hours	Yes
dog576	Unhealthy	Male	24	1 - 3	90	76	Pure	Neutered	No	>1 - 3 hours	Normal (BCS 3)	Raw food	Often	No	joint problems	No	Female	<29 years	Dogs are my hobby/profession	One	Two people	No	7 - 12 weeks	Born at my place/bought it	Fenced garden	Maximum a task	30 mins - 1 hour	11 - 30 commands	2 - 3 activities	3 - 8 hours	No
dog577	Healthy	Male	30	1 - 3	25	5	Pure	Intact	No	30 mins - 1 hour	Normal (BCS 3)	Tinned and dry food	Often	No	None	Yes	Female	40 - 49 years	I have had a dog before	None	Three people	No	7 - 12 weeks	Got as a present	Urban/suburban apartment	4 or more kinds of tasks	more than 3 hours	<10 commands	2 - 3 activities	None	No
dog578	Unhealthy	Male	111	8 - 10	25	8	Pure	Neutered	No	30 mins - 1 hour	Thin (BCS 1-2)	Raw food	Rarely	Yes	joint problems	No	Female	<29 years	Dogs are my hobby/profession	One	Two people	No	Less than 7 weeks	Got as a present	House with garden/non fenced area	2 kinds of tasks	30 mins - 1 hour	11 - 30 commands	2 - 3 activities	3 - 8 hours	Yes
dog579	Unhealthy	Male	171	> 12	20	8	Pure	Intact	Yes	>1 - 3 hours	Normal (BCS 3)	Cooked food	Often	Yes	joint problems	Yes	Female	40 - 49 years	I have had a dog before	Two or more	Two people	No	More than a year	Found it/shelter	Urban/suburban apartment	Maximum a task	>1 - 3 hours	<10 commands	One activity	3 - 8 hours	No
dog580	Unhealthy	Male	158	> 12	30	10	Pure	Intact	Yes	More than 7 hours	Thin (BCS 1-2)	Mixed	Rarely	Yes	joint problems	No	Female	30 - 39 years	I have had a dog before	One	Four or more people	No	3 - 12 months	Got as a present	Fenced garden	2 kinds of tasks	30 mins - 1 hour	<10 commands	One activity	1 - 2 hours	Yes
dog581	Healthy	Male	80	6 - 8	25	6	Pure	Neutered	No	More than 7 hours	Over-weight (BCS 4-5)	Mixed	Rarely	Yes	None	No	Female	30 - 39 years	I have had a dog before	One	Four or more people	No	3 - 12 months	Found it/shelter	Fenced garden	3 kinds of tasks	>1 - 3 hours	<10 commands	One activity	1 - 2 hours	No
dog583	Unhealthy	Male	109	8 - 10	65	46	Pure	Intact	No	More than 7 hours	Normal (BCS 3)	Tinned and dry food	Regularly (daily)	No	other disorders	No	Female	>50 years	I have never had a dog before	Two or more	Two people	No	7 - 12 weeks	Born at my place/bought it	House with garden/non fenced area	4 or more kinds of tasks	more than 3 hours	11 - 30 commands	2 - 3 activities	3 - 8 hours	No
dog584	Unhealthy	Female	40	3 - 6	30	4	Pure	Neutered	No	Less than 30 mins	Normal (BCS 3)	Dry food only	Almost never	No	joint problems	No	Female	40 - 49 years	I have had a dog before	None	Two people	No	7 - 12 weeks	Born at my place/bought it	Urban/suburban apartment	3 kinds of tasks	>1 - 3 hours	11 - 30 commands	2 - 3 activities	3 - 8 hours	No
dog585	Unhealthy	Female	117	8 - 10	40	9	Pure	Neutered	No	30 mins - 1 hour	Normal (BCS 3)	Cooked food	Often	No	joint problems	No	Female	>50 years	I have had a dog before	One	Three people	No	7 - 12 weeks	Born at my place/bought it	Urban/suburban apartment	4 or more kinds of tasks	30 mins - 1 hour	<10 commands	One activity	None	Yes
dog586	Unhealthy	Female	98	8 - 10	35	6	Pure	Intact	No	>1 - 3 hours	Normal (BCS 3)	Raw food	Rarely	Yes	tooth problems	No	Female	30 - 39 years	Dogs are my hobby/profession	Two or more	Two people	Yes	More than a year	Got as a present	Urban/suburban apartment	Maximum a task	30 mins - 1 hour	11 - 30 commands	2 - 3 activities	1 - 2 hours	No
dog587	Unhealthy	Male	178	> 12	39	38	Mixed	Neutered	Yes	>1 - 3 hours	Normal (BCS 3)	Dry food only	Regularly (daily)	Yes	joint problems	No	Female	30 - 39 years	I have had a dog before	None	Two people	No	7 - 12 weeks	Got as a present	Urban/suburban apartment	3 kinds of tasks	>1 - 3 hours	<10 commands	2 - 3 activities	None	No
dog588	Healthy	Female	75	6 - 8	50	24	Mixed	Neutered	No	>1 - 3 hours	Over-weight (BCS 4-5)	Dry food only	Rarely	No	None	No	Female	<29 years	Dogs are my hobby/profession	None	Three people	No	Less than 7 weeks	Found it/shelter	Urban/suburban apartment	4 or more kinds of tasks	>1 - 3 hours	>30 commands	2 - 3 activities	None	Yes
dog589	Unhealthy	Male	129	10 - 12	46	7	Pure	Neutered	No	>1 - 3 hours	Normal (BCS 3)	Dry food only	Rarely	Yes	tooth problems	No	Female	<29 years	Dogs are my hobby/profession	None	Two people	No	Less than 7 weeks	Got as a present	Urban/suburban apartment	4 or more kinds of tasks	more than 3 hours	11 - 30 commands	4 or more activities	3 - 8 hours	Yes
dog590	Unhealthy	Female	157	> 12	20	4	Pure	Intact	Yes	Less than 30 mins	Thin (BCS 1-2)	Tinned and dry food	Rarely	No	other disorders	No	Female	40 - 49 years	I have had a dog before	None	Two people	No	7 - 12 weeks	Born at my place/bought it	Urban/suburban apartment	Maximum a task	30 mins - 1 hour	<10 commands	One activity	3 - 8 hours	Yes
dog596	Unhealthy	Male	97	8 - 10	30	10	Pure	Neutered	No	>1 - 3 hours	Normal (BCS 3)	Cooked food	Often	No	other disorders	No	Female	40 - 49 years	I have had a dog before	Two or more	Three people	Yes	More than a year	Got as a present	Urban/suburban apartment	4 or more kinds of tasks	>1 - 3 hours	<10 commands	One activity	3 - 8 hours	No
dog597	Unhealthy	Female	170	> 12	50	35	Mixed	Neutered	Yes	>1 - 3 hours	Thin (BCS 1-2)	Mixed	Almost never	Yes	joint problems	Yes	Female	30 - 39 years	I have had a dog before	Two or more	Four or more people	Yes	Less than 7 weeks	Found it/shelter	Urban/suburban apartment	Maximum a task	Less than 30 mins	<10 commands	One activity	3 - 8 hours	Yes
dog598	Healthy	Male	75	6 - 8	55	35	Pure	Intact	No	>1 - 3 hours	Over-weight (BCS 4-5)	Cooked food	Almost never	No	None	No	Female	40 - 49 years	Dogs are my hobby/profession	Two or more	Four or more people	No	Less than 7 weeks	Born at my place/bought it	Fenced garden	Maximum a task	Less than 30 mins	<10 commands	One activity	3 - 8 hours	No
dog599	Unhealthy	Female	99	8 - 10	20	11	Pure	Neutered	No	>1 - 3 hours	Over-weight (BCS 4-5)	Tinned and dry food	Rarely	No	tooth problems	No	Female	40 - 49 years	I have had a dog before	One	One person	No	7 - 12 weeks	Born at my place/bought it	Urban/suburban apartment	4 or more kinds of tasks	>1 - 3 hours	<10 commands	2 - 3 activities	1 - 2 hours	Yes
dog600	Unhealthy	Female	112	8 - 10	20	6	Pure	Neutered	No	>1 - 3 hours	Normal (BCS 3)	Tinned and dry food	Rarely	Yes	tooth problems	No	Female	40 - 49 years	I have had a dog before	One	One person	No	More than a year	Found it/shelter	Urban/suburban apartment	Maximum a task	>1 - 3 hours	<10 commands	2 - 3 activities	1 - 2 hours	No
dog601	Unhealthy	Female	111	8 - 10	52	35	Pure	Neutered	No	>1 - 3 hours	Normal (BCS 3)	Cooked food	Regularly (daily)	No	joint problems	No	Female	40 - 49 years	I have had a dog before	One	Two people	No	7 - 12 weeks	Born at my place/bought it	House with garden/non fenced area	4 or more kinds of tasks	>1 - 3 hours	11 - 30 commands	2 - 3 activities	3 - 8 hours	Yes
dog602	Healthy	Male	19	1 - 3	27	5	Pure	Neutered	No	30 mins - 1 hour	Normal (BCS 3)	Cooked food	Almost never	Yes	None	No	Female	30 - 39 years	Dogs are my hobby/profession	Two or more	Three people	Yes	More than a year	Found it/shelter	Urban/suburban apartment	4 or more kinds of tasks	more than 3 hours	<10 commands	2 - 3 activities	None	No
dog603	Unhealthy	Male	152	> 12	55	20	Pure	Neutered	Yes	>3 - 7 hours	Normal (BCS 3)	Cooked food	Rarely	Yes	joint problems + tooth problems	No	Female	40 - 49 years	I have had a dog before	Two or more	One person	No	More than a year	Got as a present	Fenced garden	Maximum a task	30 mins - 1 hour	<10 commands	One activity	1 - 2 hours	Yes
dog604	Unhealthy	Female	81	6 - 8	55	20	Pure	Neutered	Yes	30 mins - 1 hour	Normal (BCS 3)	Cooked food	Rarely	Yes	other disorders	No	Female	40 - 49 years	Dogs are my hobby/profession	Two or more	One person	No	More than a year	Found it/shelter	Fenced garden	Maximum a task	>1 - 3 hours	<10 commands	2 - 3 activities	1 - 2 hours	Yes
dog605	Unhealthy	Female	140	10 - 12	48	20	Pure	Intact	No	30 mins - 1 hour	Normal (BCS 3)	Raw food	Regularly (daily)	Yes	joint problems	Yes	Female	40 - 49 years	I have had a dog before	Two or more	Three people	No	7 - 12 weeks	Born at my place/bought it	House with garden/non fenced area	4 or more kinds of tasks	30 mins - 1 hour	11 - 30 commands	2 - 3 activities	3 - 8 hours	No
dog607	Unhealthy	Male	198	> 12	57	31	Pure	Neutered	Yes	>1 - 3 hours	Thin (BCS 1-2)	Dry food only	Rarely	No	joint problems + tooth problems	Yes	Female	30 - 39 years	Dogs are my hobby/profession	One	One person	No	7 - 12 weeks	Found it/shelter	Urban/suburban apartment	3 kinds of tasks	Less than 30 mins	<10 commands	One activity	More than 8 hours	Yes
dog608	Healthy	Male	145	> 12	45	19	Mixed	Neutered	No	More than 7 hours	Normal (BCS 3)	Raw food	Regularly (daily)	No	None	No	Male	30 - 39 years	I have had a dog before	One	Two people	No	7 - 12 weeks	Found it/shelter	Fenced garden	4 or more kinds of tasks	30 mins - 1 hour	<10 commands	2 - 3 activities	More than 8 hours	No
dog609	Unhealthy	Male	96	8 - 10	65	50	Pure	Intact	No	More than 7 hours	Over-weight (BCS 4-5)	Dry food only	Rarely	No	joint problems	No	Female	<29 years	I have had a dog before	None	Three people	No	7 - 12 weeks	Born at my place/bought it	Fenced garden	3 kinds of tasks	30 mins - 1 hour	<10 commands	One activity	3 - 8 hours	No
dog610	Healthy	Female	102	8 - 10	22	6	Pure	Neutered	No	>1 - 3 hours	Normal (BCS 3)	Raw food	Almost never	Yes	None	No	Female	30 - 39 years	Dogs are my hobby/profession	One	Three people	Yes	7 - 12 weeks	Born at my place/bought it	Urban/suburban apartment	3 kinds of tasks	30 mins - 1 hour	<10 commands	2 - 3 activities	1 - 2 hours	No
dog611	Unhealthy	Male	135	10 - 12	60	28	Mixed	Neutered	No	>1 - 3 hours	Thin (BCS 1-2)	Dry food only	Rarely	No	joint problems + tooth problems	No	Female	30 - 39 years	Dogs are my hobby/profession	One	Two people	No	7 - 12 weeks	Got as a present	Urban/suburban apartment	4 or more kinds of tasks	>1 - 3 hours	<10 commands	2 - 3 activities	More than 8 hours	No
dog612	Unhealthy	Male	122	10 - 12	40	9	Mixed	Neutered	Yes	30 mins - 1 hour	Normal (BCS 3)	Dry food only	Almost never	Yes	joint problems + tooth problems	Yes	Female	30 - 39 years	I have never had a dog before	None	One person	No	7 - 12 weeks	Found it/shelter	Urban/suburban apartment	2 kinds of tasks	30 mins - 1 hour	<10 commands	2 - 3 activities	More than 8 hours	No
dog613	Unhealthy	Female	197	> 12	40	21	Mixed	Neutered	Yes	Less than 30 mins	Normal (BCS 3)	Mixed	Often	Yes	other disorders	Yes	Female	>50 years	I have had a dog before	Two or more	One person	No	More than a year	Found it/shelter	House with garden/non fenced area	Maximum a task	>1 - 3 hours	<10 commands	One activity	3 - 8 hours	Yes
dog614	Unhealthy	Female	114	8 - 10	20	7	Mixed	Neutered	No	Less than 30 mins	Normal (BCS 3)	Tinned and dry food	Often	Yes	joint problems + tooth problems	No	Female	30 - 39 years	I have had a dog before	None	Two people	No	More than a year	Found it/shelter	Urban/suburban apartment	4 or more kinds of tasks	>1 - 3 hours	11 - 30 commands	4 or more activities	3 - 8 hours	Yes
dog615	Unhealthy	Male	51	3 - 6	32	10	Pure	Intact	Yes	>1 - 3 hours	Normal (BCS 3)	Raw food	Often	No	other disorders	No	Female	<29 years	Dogs are my hobby/profession	None	Two people	No	3 - 12 months	Born at my place/bought it	Urban/suburban apartment	3 kinds of tasks	>1 - 3 hours	11 - 30 commands	2 - 3 activities	3 - 8 hours	No
dog616	Unhealthy	Female	100	8 - 10	59	35	Pure	Intact	Yes	30 mins - 1 hour	Over-weight (BCS 4-5)	Raw food	Often	Yes	tooth problems	Yes	Female	<29 years	Dogs are my hobby/profession	Two or more	Three people	No	7 - 12 weeks	Born at my place/bought it	Fenced garden	4 or more kinds of tasks	30 mins - 1 hour	>30 commands	2 - 3 activities	1 - 2 hours	No
dog617	Unhealthy	Male	148	> 12	30	10	Pure	Intact	Yes	Less than 30 mins	Over-weight (BCS 4-5)	Tinned and dry food	Rarely	Yes	joint problems	No	Female	<29 years	Dogs are my hobby/profession	Two or more	Four or more people	No	7 - 12 weeks	Born at my place/bought it	Urban/suburban apartment	Maximum a task	30 mins - 1 hour	<10 commands	One activity	None	Yes
dog618	Healthy	Female	19	1 - 3	45	24	Mixed	Intact	No	30 mins - 1 hour	Normal (BCS 3)	Cooked food	Rarely	No	None	No	Female	30 - 39 years	I have had a dog before	One	Two people	No	Less than 7 weeks	Got as a present	Urban/suburban apartment	3 kinds of tasks	>1 - 3 hours	<10 commands	2 - 3 activities	3 - 8 hours	No
dog620	Healthy	Female	61	3 - 6	38	14	Pure	Neutered	No	More than 7 hours	Normal (BCS 3)	Cooked food	Almost never	No	None	No	Female	40 - 49 years	I have never had a dog before	One	Three people	Yes	7 - 12 weeks	Got as a present	Urban/suburban apartment	4 or more kinds of tasks	>1 - 3 hours	<10 commands	2 - 3 activities	3 - 8 hours	No
dog621	Healthy	Female	78	6 - 8	55	17	Pure	Neutered	No	30 mins - 1 hour	Thin (BCS 1-2)	Mixed	Rarely	Yes	None	No	Female	30 - 39 years	I have had a dog before	Two or more	Two people	No	7 - 12 weeks	Born at my place/bought it	Urban/suburban apartment	4 or more kinds of tasks	>1 - 3 hours	<10 commands	2 - 3 activities	3 - 8 hours	No
dog622	Unhealthy	Female	176	> 12	50	25	Pure	Neutered	Yes	Less than 30 mins	Over-weight (BCS 4-5)	Dry food only	Regularly (daily)	Yes	joint problems	Yes	Female	<29 years	Dogs are my hobby/profession	One	One person	No	3 - 12 months	Born at my place/bought it	Fenced garden	2 kinds of tasks	>1 - 3 hours	11 - 30 commands	2 - 3 activities	1 - 2 hours	No
dog623	Healthy	Male	13	1 - 3	58	23	Pure	Intact	No	>1 - 3 hours	Normal (BCS 3)	Dry food only	Often	No	None	No	Female	<29 years	Dogs are my hobby/profession	One	One person	No	7 - 12 weeks	Born at my place/bought it	Urban/suburban apartment	4 or more kinds of tasks	>1 - 3 hours	>30 commands	4 or more activities	1 - 2 hours	No
dog624	Healthy	Male	14	1 - 3	40	10	Mixed	Intact	No	More than 7 hours	Normal (BCS 3)	Mixed	Rarely	No	None	No	Female	<29 years	I have never had a dog before	None	Three people	No	3 - 12 months	Got as a present	Fenced garden	Maximum a task	30 mins - 1 hour	<10 commands	One activity	3 - 8 hours	No
dog625	Unhealthy	Female	55	3 - 6	60	28	Mixed	Neutered	No	Less than 30 mins	Normal (BCS 3)	Cooked food	Almost never	Yes	joint problems	No	Female	<29 years	I have never had a dog before	One	Two people	No	More than a year	Found it/shelter	Fenced garden	3 kinds of tasks	30 mins - 1 hour	<10 commands	4 or more activities	3 - 8 hours	No
dog626	Unhealthy	Male	97	8 - 10	45	12	Pure	Neutered	No	>3 - 7 hours	Normal (BCS 3)	Mixed	Often	Yes	joint problems	No	Female	<29 years	Dogs are my hobby/profession	One	Four or more people	No	7 - 12 weeks	Born at my place/bought it	Fenced garden	4 or more kinds of tasks	30 mins - 1 hour	>30 commands	4 or more activities	3 - 8 hours	Yes
dog628	Unhealthy	Female	68	3 - 6	20	17	Mixed	Neutered	No	Less than 30 mins	Normal (BCS 3)	Mixed	Almost never	No	joint problems	No	Female	<29 years	I have had a dog before	None	Three people	No	Less than 7 weeks	Found it/shelter	Urban/suburban apartment	4 or more kinds of tasks	>1 - 3 hours	<10 commands	2 - 3 activities	3 - 8 hours	No
dog629	Healthy	Female	13	1 - 3	32	5	Pure	Neutered	No	>1 - 3 hours	Normal (BCS 3)	Dry food only	Almost never	No	None	No	Female	40 - 49 years	I have had a dog before	None	Three people	Yes	7 - 12 weeks	Born at my place/bought it	Fenced garden	Maximum a task	>1 - 3 hours	<10 commands	One activity	1 - 2 hours	No
dog630	Healthy	Male	51	3 - 6	45	27	Mixed	Intact	No	30 mins - 1 hour	Thin (BCS 1-2)	Mixed	Often	Yes	None	No	Female	<29 years	I have had a dog before	None	Four or more people	No	3 - 12 months	Found it/shelter	Fenced garden	Maximum a task	>1 - 3 hours	<10 commands	4 or more activities	3 - 8 hours	Yes
dog631	Healthy	Male	20	1 - 3	60	30	Pure	Intact	No	>1 - 3 hours	Normal (BCS 3)	Mixed	Rarely	No	None	No	Female	<29 years	I have had a dog before	None	One person	No	Less than 7 weeks	Born at my place/bought it	Fenced garden	2 kinds of tasks	>1 - 3 hours	<10 commands	One activity	More than 8 hours	No
dog632	Healthy	Male	37	3 - 6	70	43	Pure	Intact	No	>1 - 3 hours	Normal (BCS 3)	Raw food	Often	No	None	No	Female	<29 years	I have never had a dog before	None	Two people	No	Less than 7 weeks	Born at my place/bought it	Urban/suburban apartment	4 or more kinds of tasks	30 mins - 1 hour	11 - 30 commands	2 - 3 activities	3 - 8 hours	No
dog633	Unhealthy	Female	60	3 - 6	30	7	Pure	Neutered	No	30 mins - 1 hour	Normal (BCS 3)	Tinned and dry food	Often	No	joint problems	No	Female	>50 years	I have had a dog before	Two or more	Two people	No	7 - 12 weeks	Got as a present	Fenced garden	Maximum a task	more than 3 hours	11 - 30 commands	One activity	None	No
dog634	Unhealthy	Female	127	10 - 12	57	23	Mixed	Neutered	No	More than 7 hours	Normal (BCS 3)	Mixed	Often	Yes	other disorders	No	Female	<29 years	I have never had a dog before	None	Four or more people	No	3 - 12 months	Found it/shelter	House with garden/non fenced area	4 or more kinds of tasks	Less than 30 mins	11 - 30 commands	2 - 3 activities	More than 8 hours	Yes
dog635	Unhealthy	Male	181	> 12	20	6	Pure	Neutered	Yes	30 mins - 1 hour	Normal (BCS 3)	Tinned and dry food	Almost never	No	joint problems + tooth problems	No	Female	40 - 49 years	I have had a dog before	None	Four or more people	Yes	7 - 12 weeks	Born at my place/bought it	Urban/suburban apartment	Maximum a task	>1 - 3 hours	<10 commands	One activity	1 - 2 hours	Yes
dog636	Healthy	Male	73	6 - 8	55	24	Mixed	Neutered	No	>1 - 3 hours	Normal (BCS 3)	Dry food only	Rarely	Yes	None	No	Female	30 - 39 years	Dogs are my hobby/profession	One	Two people	No	7 - 12 weeks	Found it/shelter	Urban/suburban apartment	4 or more kinds of tasks	>1 - 3 hours	<10 commands	2 - 3 activities	More than 8 hours	No
dog637	Unhealthy	Male	109	8 - 10	25	5	Pure	Intact	No	>1 - 3 hours	Normal (BCS 3)	Raw food	Almost never	Yes	tooth problems	No	Female	40 - 49 years	I have never had a dog before	Two or more	Three people	Yes	7 - 12 weeks	Born at my place/bought it	House with garden/non fenced area	3 kinds of tasks	30 mins - 1 hour	<10 commands	One activity	1 - 2 hours	No
dog639	Healthy	Male	39	3 - 6	45	15	Mixed	Neutered	No	>1 - 3 hours	Normal (BCS 3)	Mixed	Almost never	Yes	None	No	Female	30 - 39 years	I have had a dog before	None	Two people	No	More than a year	Found it/shelter	Urban/suburban apartment	4 or more kinds of tasks	>1 - 3 hours	<10 commands	4 or more activities	3 - 8 hours	No
dog640	Unhealthy	Male	88	6 - 8	70	61	Mixed	Neutered	Yes	More than 7 hours	Over-weight (BCS 4-5)	Cooked food	Rarely	Yes	joint problems	No	Female	<29 years	I have had a dog before	One	Two people	No	3 - 12 months	Got as a present	Fenced garden	3 kinds of tasks	>1 - 3 hours	<10 commands	2 - 3 activities	3 - 8 hours	Yes
dog641	Healthy	Female	12	1 - 3	60	25	Pure	Intact	No	>1 - 3 hours	Thin (BCS 1-2)	Raw food	Rarely	No	None	No	Female	<29 years	I have had a dog before	One	Two people	No	7 - 12 weeks	Born at my place/bought it	House with garden/non fenced area	2 kinds of tasks	more than 3 hours	<10 commands	4 or more activities	3 - 8 hours	Yes
dog642	Unhealthy	Female	33	1 - 3	50	16	Mixed	Neutered	No	Less than 30 mins	Normal (BCS 3)	Dry food only	Almost never	Yes	joint problems	No	Female	30 - 39 years	I have never had a dog before	One	One person	No	Less than 7 weeks	Found it/shelter	Urban/suburban apartment	2 kinds of tasks	30 mins - 1 hour	<10 commands	2 - 3 activities	3 - 8 hours	Yes
dog643	Healthy	Female	40	3 - 6	75	45	Pure	Intact	No	More than 7 hours	Normal (BCS 3)	Mixed	Rarely	No	None	No	Female	40 - 49 years	I have had a dog before	Two or more	Four or more people	Yes	Less than 7 weeks	Born at my place/bought it	Fenced garden	2 kinds of tasks	30 mins - 1 hour	<10 commands	One activity	3 - 8 hours	No
dog644	Unhealthy	Female	120	10 - 12	32	32	Pure	Neutered	No	>3 - 7 hours	Normal (BCS 3)	Dry food only	Regularly (daily)	No	joint problems	Yes	Female	>50 years	I have never had a dog before	One	One person	No	7 - 12 weeks	Born at my place/bought it	Urban/suburban apartment	4 or more kinds of tasks	more than 3 hours	11 - 30 commands	One activity	3 - 8 hours	No
dog645	Unhealthy	Female	172	> 12	30	15	Pure	Neutered	Yes	More than 7 hours	Normal (BCS 3)	Tinned and dry food	Almost never	No	tooth problems	No	Female	>50 years	I have had a dog before	One	Four or more people	No	3 - 12 months	Born at my place/bought it	Fenced garden	Maximum a task	30 mins - 1 hour	<10 commands	One activity	More than 8 hours	Yes
dog646	Healthy	Female	51	3 - 6	35	12	Mixed	Neutered	No	30 mins - 1 hour	Normal (BCS 3)	Raw food	Almost never	Yes	None	No	Female	>50 years	I have never had a dog before	None	One person	No	More than a year	Found it/shelter	Urban/suburban apartment	Maximum a task	>1 - 3 hours	11 - 30 commands	4 or more activities	3 - 8 hours	Yes
dog647	Unhealthy	Female	82	6 - 8	20	3	Pure	Intact	No	Less than 30 mins	Normal (BCS 3)	Mixed	Almost never	Yes	tooth problems	No	Female	<29 years	I have had a dog before	Two or more	Two people	No	More than a year	Born at my place/bought it	Fenced garden	4 or more kinds of tasks	>1 - 3 hours	<10 commands	One activity	3 - 8 hours	No
dog648	Unhealthy	Male	156	> 12	75	35	Pure	Neutered	Yes	Less than 30 mins	Normal (BCS 3)	Cooked food	Rarely	No	joint problems	Yes	Female	<29 years	I have had a dog before	Two or more	Two people	No	3 - 12 months	Born at my place/bought it	Fenced garden	Maximum a task	Less than 30 mins	11 - 30 commands	One activity	3 - 8 hours	Yes
dog649	Healthy	Male	53	3 - 6	40	11	Pure	Intact	No	>1 - 3 hours	Thin (BCS 1-2)	Cooked food	Rarely	Yes	None	No	Male	40 - 49 years	I have never had a dog before	One	Two people	No	7 - 12 weeks	Got as a present	Urban/suburban apartment	3 kinds of tasks	>1 - 3 hours	11 - 30 commands	4 or more activities	3 - 8 hours	No
dog651	Healthy	Female	79	6 - 8	30	6	Pure	Intact	No	>3 - 7 hours	Normal (BCS 3)	Mixed	Regularly (daily)	No	None	No	Female	<29 years	I have had a dog before	None	Two people	No	7 - 12 weeks	Born at my place/bought it	Fenced garden	3 kinds of tasks	30 mins - 1 hour	<10 commands	One activity	3 - 8 hours	No
dog652	Healthy	Female	45	3 - 6	50	30	Mixed	Neutered	No	30 mins - 1 hour	Normal (BCS 3)	Cooked food	Rarely	Yes	None	No	Female	<29 years	I have had a dog before	One	Four or more people	No	3 - 12 months	Found it/shelter	Fenced garden	4 or more kinds of tasks	>1 - 3 hours	<10 commands	4 or more activities	None	No
dog654	Healthy	Male	42	3 - 6	23	7	Pure	Intact	No	>1 - 3 hours	Thin (BCS 1-2)	Cooked food	Rarely	No	None	No	Male	30 - 39 years	I have had a dog before	One	Two people	Yes	3 - 12 months	Born at my place/bought it	Urban/suburban apartment	3 kinds of tasks	>1 - 3 hours	<10 commands	4 or more activities	1 - 2 hours	No
dog656	Unhealthy	Female	128	10 - 12	63	30	Pure	Neutered	Yes	>1 - 3 hours	Normal (BCS 3)	Dry food only	Regularly (daily)	Yes	joint problems	No	Female	30 - 39 years	I have had a dog before	One	Four or more people	No	More than a year	Found it/shelter	Urban/suburban apartment	2 kinds of tasks	>1 - 3 hours	11 - 30 commands	One activity	None	No
dog657	Healthy	Female	105	8 - 10	25	6	Pure	Intact	No	Less than 30 mins	Normal (BCS 3)	Mixed	Almost never	Yes	None	No	Female	<29 years	I have had a dog before	None	Two people	No	7 - 12 weeks	Born at my place/bought it	Urban/suburban apartment	2 kinds of tasks	30 mins - 1 hour	<10 commands	2 - 3 activities	3 - 8 hours	No
dog658	Unhealthy	Male	39	3 - 6	23	8	Pure	Neutered	No	30 mins - 1 hour	Over-weight (BCS 4-5)	Raw food	Often	Yes	joint problems	No	Female	30 - 39 years	I have had a dog before	Two or more	Two people	No	3 - 12 months	Found it/shelter	Urban/suburban apartment	4 or more kinds of tasks	Less than 30 mins	<10 commands	2 - 3 activities	None	No
dog659	Unhealthy	Female	122	10 - 12	45	20	Pure	Neutered	Yes	Less than 30 mins	Normal (BCS 3)	Raw food	Almost never	Yes	tooth problems	No	Female	<29 years	I have never had a dog before	One	Two people	No	More than a year	Got as a present	Urban/suburban apartment	2 kinds of tasks	>1 - 3 hours	<10 commands	2 - 3 activities	3 - 8 hours	Yes
dog660	Healthy	Female	63	3 - 6	35	12	Mixed	Neutered	No	Less than 30 mins	Normal (BCS 3)	Mixed	Regularly (daily)	Yes	None	Yes	Female	<29 years	Dogs are my hobby/profession	None	Four or more people	No	More than a year	Found it/shelter	Urban/suburban apartment	Maximum a task	more than 3 hours	<10 commands	2 - 3 activities	None	No
dog661	Unhealthy	Male	60	3 - 6	52	56	Pure	Intact	No	>3 - 7 hours	Normal (BCS 3)	Cooked food	Regularly (daily)	No	joint problems	No	Female	30 - 39 years	I have had a dog before	One	Two people	No	Less than 7 weeks	Born at my place/bought it	Urban/suburban apartment	4 or more kinds of tasks	30 mins - 1 hour	11 - 30 commands	2 - 3 activities	3 - 8 hours	No
dog663	Healthy	Female	135	10 - 12	50	34	Pure	Neutered	No	>1 - 3 hours	Over-weight (BCS 4-5)	Dry food only	Rarely	No	None	No	Female	30 - 39 years	I have never had a dog before	None	One person	No	Less than 7 weeks	Born at my place/bought it	Urban/suburban apartment	3 kinds of tasks	>1 - 3 hours	<10 commands	One activity	More than 8 hours	No
dog664	Healthy	Female	16	1 - 3	45	20	Pure	Intact	No	More than 7 hours	Normal (BCS 3)	Raw food	Regularly (daily)	No	None	No	Female	<29 years	Dogs are my hobby/profession	Two or more	Four or more people	No	7 - 12 weeks	Born at my place/bought it	Urban/suburban apartment	2 kinds of tasks	30 mins - 1 hour	<10 commands	4 or more activities	None	No
dog665	Unhealthy	Male	144	> 12	23	4	Mixed	Neutered	Yes	30 mins - 1 hour	Over-weight (BCS 4-5)	Dry food only	Regularly (daily)	Yes	tooth problems	Yes	Female	40 - 49 years	Dogs are my hobby/profession	One	Two people	No	More than a year	Found it/shelter	Urban/suburban apartment	3 kinds of tasks	30 mins - 1 hour	11 - 30 commands	4 or more activities	More than 8 hours	Yes
dog666	Unhealthy	Male	169	> 12	30	10	Mixed	Neutered	Yes	Less than 30 mins	Normal (BCS 3)	Cooked food	Often	Yes	tooth problems	Yes	Female	30 - 39 years	I have had a dog before	One	Two people	No	More than a year	Found it/shelter	Urban/suburban apartment	2 kinds of tasks	>1 - 3 hours	<10 commands	2 - 3 activities	More than 8 hours	Yes
dog667	Unhealthy	Male	114	8 - 10	40	25	Mixed	Intact	No	Less than 30 mins	Normal (BCS 3)	Mixed	Regularly (daily)	Yes	other disorders	No	Female	<29 years	I have had a dog before	None	Four or more people	Yes	3 - 12 months	Got as a present	Fenced garden	2 kinds of tasks	30 mins - 1 hour	<10 commands	2 - 3 activities	3 - 8 hours	No
dog668	Unhealthy	Female	198	> 12	47	23	Pure	Neutered	Yes	30 mins - 1 hour	Normal (BCS 3)	Dry food only	Almost never	Yes	joint problems + tooth problems	Yes	Female	30 - 39 years	I have had a dog before	One	One person	No	More than a year	Found it/shelter	House with garden/non fenced area	Maximum a task	Less than 30 mins	<10 commands	One activity	More than 8 hours	No
dog669	Healthy	Male	56	3 - 6	30	4	Pure	Neutered	No	30 mins - 1 hour	Normal (BCS 3)	Dry food only	Rarely	No	None	No	Female	<29 years	I have had a dog before	Two or more	Four or more people	No	7 - 12 weeks	Born at my place/bought it	Urban/suburban apartment	4 or more kinds of tasks	>1 - 3 hours	11 - 30 commands	4 or more activities	3 - 8 hours	No
dog670	Healthy	Female	84	6 - 8	50	20	Mixed	Neutered	No	>1 - 3 hours	Over-weight (BCS 4-5)	Raw food	Rarely	No	None	No	Male	30 - 39 years	I have had a dog before	One	Two people	No	7 - 12 weeks	Found it/shelter	Urban/suburban apartment	3 kinds of tasks	>1 - 3 hours	<10 commands	4 or more activities	3 - 8 hours	No
dog671	Unhealthy	Female	102	8 - 10	20	4	Pure	Neutered	Yes	30 mins - 1 hour	Normal (BCS 3)	Tinned and dry food	Rarely	Yes	tooth problems	No	Female	30 - 39 years	I have had a dog before	One	Three people	No	More than a year	Found it/shelter	Urban/suburban apartment	3 kinds of tasks	30 mins - 1 hour	<10 commands	One activity	3 - 8 hours	No
dog672	Healthy	Male	61	3 - 6	30	6	Pure	Neutered	No	Less than 30 mins	Normal (BCS 3)	Mixed	Almost never	No	None	No	Female	<29 years	Dogs are my hobby/profession	None	Three people	No	Less than 7 weeks	Born at my place/bought it	Urban/suburban apartment	4 or more kinds of tasks	30 mins - 1 hour	11 - 30 commands	4 or more activities	3 - 8 hours	No
dog673	Healthy	Female	55	3 - 6	45	9	Pure	Neutered	No	>1 - 3 hours	Normal (BCS 3)	Raw food	Almost never	Yes	None	No	Female	30 - 39 years	I have had a dog before	One	Two people	No	More than a year	Found it/shelter	Urban/suburban apartment	4 or more kinds of tasks	more than 3 hours	11 - 30 commands	2 - 3 activities	3 - 8 hours	No
dog674	Unhealthy	Female	132	10 - 12	20	5	Pure	Intact	No	>1 - 3 hours	Normal (BCS 3)	Dry food only	Almost never	No	tooth problems	No	Female	30 - 39 years	Dogs are my hobby/profession	None	Two people	No	7 - 12 weeks	Got as a present	Urban/suburban apartment	4 or more kinds of tasks	more than 3 hours	11 - 30 commands	2 - 3 activities	3 - 8 hours	No
dog675	Unhealthy	Female	79	6 - 8	45	9	Pure	Intact	No	>3 - 7 hours	Normal (BCS 3)	Cooked food	Almost never	Yes	tooth problems	No	Female	30 - 39 years	I have had a dog before	Two or more	Three people	Yes	3 - 12 months	Got as a present	Urban/suburban apartment	Maximum a task	>1 - 3 hours	<10 commands	One activity	3 - 8 hours	No
dog676	Unhealthy	Female	128	10 - 12	45	13	Pure	Neutered	No	>1 - 3 hours	Over-weight (BCS 4-5)	Dry food only	Almost never	Yes	joint problems	No	Female	30 - 39 years	I have had a dog before	Two or more	Two people	No	Less than 7 weeks	Got as a present	Urban/suburban apartment	4 or more kinds of tasks	>1 - 3 hours	11 - 30 commands	2 - 3 activities	3 - 8 hours	No
dog677	Healthy	Male	131	10 - 12	27	6	Pure	Intact	No	>1 - 3 hours	Normal (BCS 3)	Cooked food	Almost never	No	None	No	Female	<29 years	Dogs are my hobby/profession	Two or more	Four or more people	No	Less than 7 weeks	Born at my place/bought it	Urban/suburban apartment	4 or more kinds of tasks	>1 - 3 hours	11 - 30 commands	2 - 3 activities	3 - 8 hours	No
dog678	Unhealthy	Male	61	3 - 6	23	3	Pure	Intact	No	Less than 30 mins	Normal (BCS 3)	Cooked food	Regularly (daily)	No	joint problems + tooth problems	No	Female	40 - 49 years	I have had a dog before	Two or more	Four or more people	Yes	7 - 12 weeks	Born at my place/bought it	Urban/suburban apartment	4 or more kinds of tasks	30 mins - 1 hour	<10 commands	2 - 3 activities	1 - 2 hours	No
dog679	Healthy	Female	14	1 - 3	30	4	Pure	Intact	No	Less than 30 mins	Normal (BCS 3)	Dry food only	Rarely	No	None	No	Female	<29 years	Dogs are my hobby/profession	None	Two people	No	7 - 12 weeks	Got as a present	Urban/suburban apartment	4 or more kinds of tasks	more than 3 hours	11 - 30 commands	4 or more activities	3 - 8 hours	Yes
dog680	Healthy	Female	34	1 - 3	23	5	Pure	Neutered	No	Less than 30 mins	Normal (BCS 3)	Raw food	Almost never	Yes	None	No	Female	30 - 39 years	I have never had a dog before	None	Two people	No	7 - 12 weeks	Born at my place/bought it	Urban/suburban apartment	4 or more kinds of tasks	more than 3 hours	<10 commands	4 or more activities	3 - 8 hours	Yes
dog681	Unhealthy	Male	32	1 - 3	22	10	Pure	Neutered	No	Less than 30 mins	Over-weight (BCS 4-5)	Cooked food	Often	Yes	joint problems	No	Female	30 - 39 years	I have had a dog before	None	Two people	No	3 - 12 months	Born at my place/bought it	Urban/suburban apartment	2 kinds of tasks	30 mins - 1 hour	11 - 30 commands	4 or more activities	3 - 8 hours	No
dog682	Unhealthy	Male	87	6 - 8	71	40	Pure	Intact	No	More than 7 hours	Thin (BCS 1-2)	Dry food only	Rarely	Yes	joint problems	No	Female	30 - 39 years	I have had a dog before	One	Four or more people	Yes	7 - 12 weeks	Born at my place/bought it	Fenced garden	4 or more kinds of tasks	30 mins - 1 hour	11 - 30 commands	2 - 3 activities	3 - 8 hours	No
dog683	Unhealthy	Female	124	10 - 12	65	36	Mixed	Neutered	No	30 mins - 1 hour	Normal (BCS 3)	Mixed	Rarely	No	joint problems + tooth problems	No	Female	<29 years	I have had a dog before	One	Four or more people	No	Less than 7 weeks	Born at my place/bought it	House with garden/non fenced area	4 or more kinds of tasks	30 mins - 1 hour	11 - 30 commands	2 - 3 activities	1 - 2 hours	No
dog685	Unhealthy	Male	83	6 - 8	53	33	Pure	Intact	No	More than 7 hours	Normal (BCS 3)	Dry food only	Almost never	No	tooth problems	No	Male	>50 years	I have had a dog before	None	Three people	Yes	Less than 7 weeks	Born at my place/bought it	Fenced garden	3 kinds of tasks	more than 3 hours	11 - 30 commands	2 - 3 activities	1 - 2 hours	No
dog686	Unhealthy	Male	316	> 12	55	35	Mixed	Neutered	Yes	>1 - 3 hours	Normal (BCS 3)	Mixed	Regularly (daily)	No	joint problems + tooth problems	Yes	Female	<29 years	I have had a dog before	One	Four or more people	No	More than a year	Found it/shelter	Fenced garden	3 kinds of tasks	>1 - 3 hours	<10 commands	2 - 3 activities	3 - 8 hours	No
dog687	Unhealthy	Female	119	8 - 10	35	8	Pure	Intact	No	>1 - 3 hours	Normal (BCS 3)	Tinned and dry food	Almost never	No	joint problems + tooth problems	No	Female	>50 years	I have had a dog before	None	Two people	No	More than a year	Found it/shelter	Urban/suburban apartment	3 kinds of tasks	>1 - 3 hours	<10 commands	2 - 3 activities	1 - 2 hours	Yes
dog688	Unhealthy	Female	135	10 - 12	40	14	Mixed	Neutered	No	>3 - 7 hours	Over-weight (BCS 4-5)	Cooked food	Often	Yes	tooth problems	Yes	Female	<29 years	Dogs are my hobby/profession	None	Two people	No	Less than 7 weeks	Got as a present	Fenced garden	4 or more kinds of tasks	30 mins - 1 hour	11 - 30 commands	2 - 3 activities	3 - 8 hours	No
dog690	Healthy	Female	31	1 - 3	40	20	Mixed	Neutered	No	>3 - 7 hours	Normal (BCS 3)	Dry food only	Often	No	None	No	Female	30 - 39 years	I have had a dog before	Two or more	Two people	No	3 - 12 months	Got as a present	Fenced garden	4 or more kinds of tasks	30 mins - 1 hour	11 - 30 commands	2 - 3 activities	None	No
dog692	Unhealthy	Female	112	8 - 10	55	47	Pure	Neutered	No	>1 - 3 hours	Normal (BCS 3)	Dry food only	Rarely	No	joint problems	Yes	Female	30 - 39 years	Dogs are my hobby/profession	One	Three people	No	7 - 12 weeks	Born at my place/bought it	Urban/suburban apartment	2 kinds of tasks	30 mins - 1 hour	11 - 30 commands	One activity	3 - 8 hours	No
dog693	Healthy	Female	45	3 - 6	35	11	Pure	Neutered	No	30 mins - 1 hour	Normal (BCS 3)	Cooked food	Often	Yes	None	No	Female	30 - 39 years	I have never had a dog before	None	Three people	No	More than a year	Got as a present	Urban/suburban apartment	4 or more kinds of tasks	>1 - 3 hours	11 - 30 commands	4 or more activities	None	No
dog694	Healthy	Male	47	3 - 6	30	7	Pure	Intact	No	More than 7 hours	Normal (BCS 3)	Mixed	Rarely	No	None	No	Male	<29 years	I have never had a dog before	One	Four or more people	No	7 - 12 weeks	Got as a present	Urban/suburban apartment	4 or more kinds of tasks	more than 3 hours	11 - 30 commands	2 - 3 activities	None	No
dog695	Unhealthy	Female	43	3 - 6	50	25	Pure	Neutered	No	30 mins - 1 hour	Normal (BCS 3)	Raw food	Rarely	No	joint problems	No	Female	30 - 39 years	I have had a dog before	None	Two people	No	7 - 12 weeks	Born at my place/bought it	House with garden/non fenced area	3 kinds of tasks	>1 - 3 hours	11 - 30 commands	2 - 3 activities	More than 8 hours	No
dog696	Unhealthy	Female	108	8 - 10	59	28	Pure	Neutered	No	30 mins - 1 hour	Over-weight (BCS 4-5)	Cooked food	Rarely	No	other disorders	No	Female	30 - 39 years	Dogs are my hobby/profession	One	Two people	No	Less than 7 weeks	Got as a present	House with garden/non fenced area	4 or more kinds of tasks	30 mins - 1 hour	11 - 30 commands	2 - 3 activities	None	No
dog697	Healthy	Male	14	1 - 3	20	25	Mixed	Neutered	No	30 mins - 1 hour	Normal (BCS 3)	Cooked food	Often	No	None	No	Female	<29 years	I have had a dog before	None	Three people	No	7 - 12 weeks	Found it/shelter	Urban/suburban apartment	4 or more kinds of tasks	more than 3 hours	11 - 30 commands	4 or more activities	3 - 8 hours	No
dog698	Unhealthy	Female	86	6 - 8	45	28	Pure	Neutered	No	>1 - 3 hours	Normal (BCS 3)	Dry food only	Regularly (daily)	No	joint problems + tooth problems	No	Male	40 - 49 years	I have never had a dog before	None	One person	No	7 - 12 weeks	Born at my place/bought it	Urban/suburban apartment	4 or more kinds of tasks	>1 - 3 hours	<10 commands	2 - 3 activities	1 - 2 hours	Yes
dog699	Healthy	Male	63	3 - 6	70	25	Mixed	Intact	No	More than 7 hours	Thin (BCS 1-2)	Dry food only	Almost never	Yes	None	No	Female	30 - 39 years	Dogs are my hobby/profession	None	Four or more people	Yes	Less than 7 weeks	Found it/shelter	Fenced garden	4 or more kinds of tasks	30 mins - 1 hour	11 - 30 commands	2 - 3 activities	3 - 8 hours	No
dog700	Healthy	Female	34	1 - 3	61	20	Mixed	Neutered	No	>1 - 3 hours	Thin (BCS 1-2)	Tinned and dry food	Often	No	None	No	Female	40 - 49 years	I have had a dog before	Two or more	Four or more people	Yes	7 - 12 weeks	Found it/shelter	Urban/suburban apartment	4 or more kinds of tasks	>1 - 3 hours	11 - 30 commands	2 - 3 activities	3 - 8 hours	No
dog702	Unhealthy	Female	155	> 12	56	33	Pure	Intact	Yes	>1 - 3 hours	Normal (BCS 3)	Dry food only	Often	Yes	joint problems	No	Female	<29 years	Dogs are my hobby/profession	One	Two people	No	7 - 12 weeks	Got as a present	Fenced garden	4 or more kinds of tasks	30 mins - 1 hour	11 - 30 commands	2 - 3 activities	3 - 8 hours	No
dog703	Healthy	Female	64	3 - 6	50	16	Mixed	Neutered	No	>1 - 3 hours	Normal (BCS 3)	Dry food only	Regularly (daily)	No	None	No	Female	30 - 39 years	I have had a dog before	One	Two people	No	Less than 7 weeks	Got as a present	Fenced garden	4 or more kinds of tasks	>1 - 3 hours	11 - 30 commands	4 or more activities	3 - 8 hours	No
dog704	Unhealthy	Male	35	1 - 3	35	9	Mixed	Neutered	No	>3 - 7 hours	Over-weight (BCS 4-5)	Mixed	Almost never	Yes	joint problems	No	Female	40 - 49 years	I have had a dog before	Two or more	Three people	No	7 - 12 weeks	Found it/shelter	Urban/suburban apartment	4 or more kinds of tasks	>1 - 3 hours	<10 commands	2 - 3 activities	1 - 2 hours	Yes
dog705	Healthy	Male	43	3 - 6	29	5	Pure	Intact	No	>1 - 3 hours	Normal (BCS 3)	Raw food	Often	No	None	No	Female	<29 years	I have never had a dog before	One	Four or more people	No	7 - 12 weeks	Born at my place/bought it	Urban/suburban apartment	3 kinds of tasks	30 mins - 1 hour	11 - 30 commands	2 - 3 activities	None	No
dog706	Healthy	Female	28	1 - 3	63	42	Pure	Intact	No	More than 7 hours	Normal (BCS 3)	Raw food	Rarely	No	None	No	Female	<29 years	I have had a dog before	One	Four or more people	No	7 - 12 weeks	Born at my place/bought it	Fenced garden	4 or more kinds of tasks	30 mins - 1 hour	11 - 30 commands	4 or more activities	None	No
dog707	Healthy	Male	76	6 - 8	50	50	Pure	Intact	No	More than 7 hours	Over-weight (BCS 4-5)	Mixed	Often	No	None	No	Female	30 - 39 years	I have had a dog before	One	Three people	Yes	Less than 7 weeks	Got as a present	Fenced garden	4 or more kinds of tasks	Less than 30 mins	<10 commands	2 - 3 activities	3 - 8 hours	No
dog708	Healthy	Male	78	6 - 8	60	40	Mixed	Neutered	No	Less than 30 mins	Over-weight (BCS 4-5)	Mixed	Almost never	Yes	None	No	Female	30 - 39 years	I have had a dog before	One	Three people	Yes	More than a year	Found it/shelter	Fenced garden	3 kinds of tasks	30 mins - 1 hour	11 - 30 commands	One activity	More than 8 hours	Yes
dog709	Healthy	Male	73	6 - 8	53	33	Pure	Neutered	No	Less than 30 mins	Normal (BCS 3)	Mixed	Rarely	No	None	No	Female	<29 years	I have had a dog before	One	Three people	No	7 - 12 weeks	Born at my place/bought it	Fenced garden	4 or more kinds of tasks	30 mins - 1 hour	11 - 30 commands	2 - 3 activities	3 - 8 hours	Yes
dog710	Unhealthy	Female	115	8 - 10	50	15	Mixed	Neutered	No	Less than 30 mins	Normal (BCS 3)	Tinned and dry food	Rarely	Yes	other disorders	No	Female	<29 years	I have never had a dog before	Two or more	Two people	No	7 - 12 weeks	Found it/shelter	Urban/suburban apartment	4 or more kinds of tasks	>1 - 3 hours	11 - 30 commands	2 - 3 activities	3 - 8 hours	Yes
dog711	Unhealthy	Male	23	1 - 3	25	3	Pure	Intact	No	30 mins - 1 hour	Normal (BCS 3)	Tinned and dry food	Rarely	Yes	joint problems	No	Female	30 - 39 years	Dogs are my hobby/profession	Two or more	Four or more people	Yes	Less than 7 weeks	Got as a present	Urban/suburban apartment	Maximum a task	30 mins - 1 hour	<10 commands	One activity	1 - 2 hours	No
dog712	Unhealthy	Male	156	> 12	40	10	Pure	Intact	Yes	>1 - 3 hours	Thin (BCS 1-2)	Dry food only	Rarely	Yes	joint problems + tooth problems	No	Female	30 - 39 years	Dogs are my hobby/profession	Two or more	Three people	Yes	Less than 7 weeks	Born at my place/bought it	Fenced garden	Maximum a task	30 mins - 1 hour	>30 commands	One activity	3 - 8 hours	No
dog713	Unhealthy	Male	210	> 12	41	20	Pure	Intact	No	More than 7 hours	Normal (BCS 3)	Raw food	Almost never	Yes	tooth problems	No	Female	>50 years	Dogs are my hobby/profession	Two or more	Three people	Yes	Less than 7 weeks	Found it/shelter	House with garden/non fenced area	4 or more kinds of tasks	more than 3 hours	11 - 30 commands	4 or more activities	More than 8 hours	No
dog714	Unhealthy	Male	41	3 - 6	65	45	Pure	Intact	No	More than 7 hours	Over-weight (BCS 4-5)	Dry food only	Regularly (daily)	No	other disorders	No	Female	40 - 49 years	Dogs are my hobby/profession	Two or more	Two people	No	Less than 7 weeks	Born at my place/bought it	Fenced garden	4 or more kinds of tasks	>1 - 3 hours	>30 commands	4 or more activities	None	No
dog715	Healthy	Male	27	1 - 3	50	43	Pure	Intact	No	More than 7 hours	Normal (BCS 3)	Raw food	Rarely	No	None	No	Male	<29 years	I have had a dog before	None	Four or more people	Yes	7 - 12 weeks	Got as a present	Fenced garden	3 kinds of tasks	30 mins - 1 hour	<10 commands	2 - 3 activities	3 - 8 hours	No
dog716	Healthy	Male	16	1 - 3	48	40	Pure	Intact	No	>3 - 7 hours	Normal (BCS 3)	Raw food	Rarely	No	None	No	Female	<29 years	I have had a dog before	None	Four or more people	Yes	7 - 12 weeks	Got as a present	Fenced garden	Maximum a task	>1 - 3 hours	<10 commands	One activity	1 - 2 hours	No
dog717	Unhealthy	Female	152	> 12	30	9	Pure	Intact	No	>1 - 3 hours	Thin (BCS 1-2)	Mixed	Rarely	Yes	other disorders	No	Female	30 - 39 years	I have had a dog before	Two or more	Two people	No	Less than 7 weeks	Born at my place/bought it	House with garden/non fenced area	4 or more kinds of tasks	30 mins - 1 hour	<10 commands	One activity	3 - 8 hours	No
dog718	Unhealthy	Male	75	6 - 8	50	42	Pure	Intact	No	More than 7 hours	Normal (BCS 3)	Raw food	Often	Yes	joint problems	Yes	Female	<29 years	I have had a dog before	One	Four or more people	No	7 - 12 weeks	Got as a present	Urban/suburban apartment	4 or more kinds of tasks	30 mins - 1 hour	11 - 30 commands	2 - 3 activities	3 - 8 hours	No
dog719	Healthy	Female	29	1 - 3	50	25	Pure	Intact	No	>3 - 7 hours	Normal (BCS 3)	Mixed	Rarely	No	None	No	Female	40 - 49 years	I have had a dog before	None	Two people	No	7 - 12 weeks	Got as a present	Fenced garden	3 kinds of tasks	30 mins - 1 hour	11 - 30 commands	2 - 3 activities	3 - 8 hours	No
dog720	Unhealthy	Male	169	> 12	50	18	Pure	Neutered	Yes	>1 - 3 hours	Over-weight (BCS 4-5)	Raw food	Rarely	Yes	joint problems + tooth problems	No	Female	30 - 39 years	Dogs are my hobby/profession	Two or more	Two people	No	More than a year	Found it/shelter	Urban/suburban apartment	Maximum a task	>1 - 3 hours	<10 commands	One activity	3 - 8 hours	No
dog721	Unhealthy	Female	181	> 12	40	13	Pure	Neutered	No	>1 - 3 hours	Over-weight (BCS 4-5)	Raw food	Rarely	Yes	joint problems + tooth problems	Yes	Female	30 - 39 years	Dogs are my hobby/profession	Two or more	Two people	No	More than a year	Found it/shelter	Urban/suburban apartment	Maximum a task	>1 - 3 hours	<10 commands	One activity	3 - 8 hours	No
dog722	Unhealthy	Male	145	> 12	35	8	Mixed	Neutered	No	>1 - 3 hours	Normal (BCS 3)	Raw food	Rarely	Yes	tooth problems	No	Female	30 - 39 years	Dogs are my hobby/profession	Two or more	Two people	No	More than a year	Found it/shelter	Urban/suburban apartment	4 or more kinds of tasks	>1 - 3 hours	11 - 30 commands	One activity	3 - 8 hours	No
dog723	Unhealthy	Female	169	> 12	50	30	Pure	Neutered	Yes	More than 7 hours	Thin (BCS 1-2)	Dry food only	Regularly (daily)	No	joint problems + tooth problems	No	Female	40 - 49 years	Dogs are my hobby/profession	Two or more	One person	No	7 - 12 weeks	Born at my place/bought it	Fenced garden	4 or more kinds of tasks	>1 - 3 hours	>30 commands	2 - 3 activities	1 - 2 hours	Yes
dog725	Unhealthy	Male	144	> 12	30	9	Pure	Intact	Yes	30 mins - 1 hour	Over-weight (BCS 4-5)	Mixed	Regularly (daily)	Yes	tooth problems	Yes	Female	<29 years	I have never had a dog before	None	Four or more people	No	Less than 7 weeks	Born at my place/bought it	Urban/suburban apartment	4 or more kinds of tasks	more than 3 hours	<10 commands	2 - 3 activities	None	Yes
dog726	Healthy	Female	72	6 - 8	60	50	Pure	Intact	No	Less than 30 mins	Over-weight (BCS 4-5)	Raw food	Rarely	Yes	None	No	Female	<29 years	I have had a dog before	One	Four or more people	No	7 - 12 weeks	Got as a present	Fenced garden	4 or more kinds of tasks	30 mins - 1 hour	11 - 30 commands	4 or more activities	3 - 8 hours	No
dog728	Unhealthy	Male	39	3 - 6	40	33	Pure	Intact	No	More than 7 hours	Over-weight (BCS 4-5)	Dry food only	Almost never	No	tooth problems	No	Female	<29 years	I have had a dog before	One	Four or more people	No	7 - 12 weeks	Born at my place/bought it	Fenced garden	3 kinds of tasks	30 mins - 1 hour	<10 commands	4 or more activities	3 - 8 hours	No
dog729	Healthy	Female	120	10 - 12	50	30	Pure	Intact	No	>3 - 7 hours	Normal (BCS 3)	Mixed	Almost never	No	None	No	Male	40 - 49 years	Dogs are my hobby/profession	None	Two people	Yes	Less than 7 weeks	Born at my place/bought it	Fenced garden	2 kinds of tasks	30 mins - 1 hour	<10 commands	One activity	3 - 8 hours	No
dog730	Healthy	Female	22	1 - 3	24	5	Pure	Neutered	No	Less than 30 mins	Normal (BCS 3)	Dry food only	Regularly (daily)	No	None	No	Female	40 - 49 years	I have never had a dog before	One	Two people	No	Less than 7 weeks	Born at my place/bought it	Urban/suburban apartment	Maximum a task	30 mins - 1 hour	11 - 30 commands	One activity	3 - 8 hours	No
dog731	Unhealthy	Male	120	10 - 12	40	28	Mixed	Intact	Yes	More than 7 hours	Normal (BCS 3)	Mixed	Often	No	joint problems	No	Female	<29 years	I have never had a dog before	One	Four or more people	No	3 - 12 months	Got as a present	Fenced garden	3 kinds of tasks	>1 - 3 hours	<10 commands	One activity	3 - 8 hours	No
dog733	Unhealthy	Male	180	> 12	27	11	Pure	Intact	Yes	Less than 30 mins	Normal (BCS 3)	Cooked food	Rarely	Yes	joint problems + tooth problems	Yes	Female	30 - 39 years	I have had a dog before	None	Two people	No	7 - 12 weeks	Born at my place/bought it	Urban/suburban apartment	Maximum a task	>1 - 3 hours	<10 commands	One activity	3 - 8 hours	No
dog734	Unhealthy	Male	194	> 12	40	15	Mixed	Neutered	Yes	30 mins - 1 hour	Normal (BCS 3)	Dry food only	Regularly (daily)	No	tooth problems	No	Female	30 - 39 years	Dogs are my hobby/profession	One	Three people	Yes	7 - 12 weeks	Got as a present	Urban/suburban apartment	3 kinds of tasks	>1 - 3 hours	<10 commands	One activity	1 - 2 hours	No
dog735	Healthy	Female	37	3 - 6	25	5	Pure	Intact	No	>1 - 3 hours	Thin (BCS 1-2)	Raw food	Rarely	No	None	No	Female	<29 years	I have had a dog before	Two or more	Four or more people	No	7 - 12 weeks	Born at my place/bought it	Urban/suburban apartment	3 kinds of tasks	>1 - 3 hours	<10 commands	2 - 3 activities	3 - 8 hours	No
dog736	Healthy	Male	47	3 - 6	25	18	Mixed	Intact	No	More than 7 hours	Normal (BCS 3)	Mixed	Often	No	None	No	Female	<29 years	I have had a dog before	None	Three people	Yes	7 - 12 weeks	Got as a present	Fenced garden	4 or more kinds of tasks	>1 - 3 hours	<10 commands	2 - 3 activities	3 - 8 hours	No
dog737	Healthy	Female	47	3 - 6	25	6	Pure	Neutered	No	30 mins - 1 hour	Normal (BCS 3)	Mixed	Regularly (daily)	No	None	No	Female	<29 years	I have never had a dog before	None	Four or more people	No	Less than 7 weeks	Got as a present	Urban/suburban apartment	2 kinds of tasks	30 mins - 1 hour	<10 commands	One activity	3 - 8 hours	No
dog739	Healthy	Male	41	3 - 6	46	24	Pure	Neutered	No	>3 - 7 hours	Thin (BCS 1-2)	Raw food	Often	Yes	None	No	Female	<29 years	Dogs are my hobby/profession	One	Four or more people	No	More than a year	Found it/shelter	House with garden/non fenced area	4 or more kinds of tasks	>1 - 3 hours	11 - 30 commands	4 or more activities	3 - 8 hours	No
dog740	Healthy	Male	22	1 - 3	25	5	Pure	Neutered	No	>1 - 3 hours	Normal (BCS 3)	Tinned and dry food	Often	No	None	No	Male	>50 years	I have had a dog before	None	Four or more people	Yes	7 - 12 weeks	Born at my place/bought it	Urban/suburban apartment	2 kinds of tasks	30 mins - 1 hour	<10 commands	One activity	1 - 2 hours	Yes
dog741	Healthy	Female	72	6 - 8	40	12	Mixed	Neutered	No	>1 - 3 hours	Normal (BCS 3)	Dry food only	Almost never	Yes	None	Yes	Female	40 - 49 years	I have never had a dog before	None	Three people	Yes	7 - 12 weeks	Found it/shelter	Urban/suburban apartment	4 or more kinds of tasks	>1 - 3 hours	11 - 30 commands	4 or more activities	3 - 8 hours	No
dog742	Healthy	Female	92	6 - 8	27	13	Mixed	Neutered	No	More than 7 hours	Over-weight (BCS 4-5)	Mixed	Almost never	No	None	No	Female	40 - 49 years	I have had a dog before	Two or more	Four or more people	Yes	3 - 12 months	Got as a present	Fenced garden	3 kinds of tasks	Less than 30 mins	<10 commands	One activity	1 - 2 hours	No
dog743	Unhealthy	Female	63	3 - 6	50	26	Pure	Neutered	No	30 mins - 1 hour	Thin (BCS 1-2)	Dry food only	Rarely	No	other disorders	No	Female	30 - 39 years	I have had a dog before	Two or more	Two people	No	7 - 12 weeks	Born at my place/bought it	Urban/suburban apartment	4 or more kinds of tasks	30 mins - 1 hour	>30 commands	4 or more activities	None	No
dog744	Unhealthy	Male	138	10 - 12	30	5	Pure	Neutered	Yes	30 mins - 1 hour	Thin (BCS 1-2)	Cooked food	Often	Yes	joint problems + tooth problems	Yes	Female	>50 years	I have had a dog before	None	One person	No	3 - 12 months	Got as a present	Urban/suburban apartment	4 or more kinds of tasks	more than 3 hours	<10 commands	One activity	None	Yes
dog745	Healthy	Male	26	1 - 3	60	39	Pure	Intact	No	>1 - 3 hours	Normal (BCS 3)	Mixed	Rarely	No	None	No	Female	<29 years	I have never had a dog before	None	Three people	No	7 - 12 weeks	Born at my place/bought it	Fenced garden	4 or more kinds of tasks	>1 - 3 hours	11 - 30 commands	4 or more activities	None	No
dog746	Unhealthy	Female	85	6 - 8	40	39	Pure	Neutered	No	30 mins - 1 hour	Over-weight (BCS 4-5)	Mixed	Often	No	tooth problems	No	Female	<29 years	I have had a dog before	Two or more	Four or more people	No	Less than 7 weeks	Born at my place/bought it	Fenced garden	4 or more kinds of tasks	more than 3 hours	11 - 30 commands	4 or more activities	None	Yes
dog747	Unhealthy	Female	82	6 - 8	30	14	Mixed	Neutered	No	>1 - 3 hours	Normal (BCS 3)	Mixed	Regularly (daily)	Yes	joint problems	No	Female	40 - 49 years	I have never had a dog before	One	Two people	No	More than a year	Found it/shelter	Fenced garden	4 or more kinds of tasks	>1 - 3 hours	11 - 30 commands	2 - 3 activities	3 - 8 hours	No
dog748	Healthy	Male	63	3 - 6	27	7	Pure	Neutered	No	>1 - 3 hours	Over-weight (BCS 4-5)	Tinned and dry food	Regularly (daily)	No	None	No	Female	<29 years	Dogs are my hobby/profession	Two or more	Two people	No	7 - 12 weeks	Born at my place/bought it	Urban/suburban apartment	2 kinds of tasks	>1 - 3 hours	<10 commands	One activity	3 - 8 hours	No
dog749	Unhealthy	Male	93	6 - 8	23	12	Mixed	Neutered	No	>1 - 3 hours	Normal (BCS 3)	Tinned and dry food	Almost never	Yes	tooth problems	No	Female	30 - 39 years	I have never had a dog before	None	Two people	No	7 - 12 weeks	Found it/shelter	Urban/suburban apartment	4 or more kinds of tasks	more than 3 hours	11 - 30 commands	2 - 3 activities	3 - 8 hours	No
dog750	Healthy	Female	116	8 - 10	25	5	Pure	Intact	No	>1 - 3 hours	Normal (BCS 3)	Cooked food	Often	Yes	None	Yes	Female	40 - 49 years	I have had a dog before	Two or more	Four or more people	Yes	Less than 7 weeks	Born at my place/bought it	Urban/suburban apartment	3 kinds of tasks	more than 3 hours	11 - 30 commands	One activity	1 - 2 hours	No
dog752	Healthy	Female	92	6 - 8	25	7	Pure	Neutered	No	Less than 30 mins	Over-weight (BCS 4-5)	Raw food	Almost never	Yes	None	No	Female	>50 years	I have had a dog before	One	One person	No	Less than 7 weeks	Got as a present	Urban/suburban apartment	Maximum a task	>1 - 3 hours	11 - 30 commands	One activity	3 - 8 hours	No
dog753	Healthy	Male	18	1 - 3	40	7	Mixed	Neutered	No	30 mins - 1 hour	Thin (BCS 1-2)	Mixed	Almost never	No	None	No	Female	>50 years	I have never had a dog before	None	Two people	No	3 - 12 months	Found it/shelter	Urban/suburban apartment	3 kinds of tasks	>1 - 3 hours	<10 commands	2 - 3 activities	None	Yes
dog754	Healthy	Female	93	6 - 8	45	10	Mixed	Intact	No	More than 7 hours	Normal (BCS 3)	Cooked food	Rarely	Yes	None	No	Female	<29 years	Dogs are my hobby/profession	Two or more	Three people	Yes	Less than 7 weeks	Found it/shelter	Fenced garden	4 or more kinds of tasks	>1 - 3 hours	11 - 30 commands	2 - 3 activities	None	No
dog755	Unhealthy	Female	67	3 - 6	66	42	Pure	Neutered	No	Less than 30 mins	Thin (BCS 1-2)	Dry food only	Rarely	Yes	joint problems	No	Female	<29 years	Dogs are my hobby/profession	Two or more	Four or more people	Yes	7 - 12 weeks	Born at my place/bought it	Fenced garden	4 or more kinds of tasks	30 mins - 1 hour	11 - 30 commands	2 - 3 activities	3 - 8 hours	No
dog756	Healthy	Male	20	1 - 3	70	35	Pure	Intact	No	>3 - 7 hours	Normal (BCS 3)	Dry food only	Regularly (daily)	No	None	No	Female	<29 years	Dogs are my hobby/profession	Two or more	Two people	No	7 - 12 weeks	Born at my place/bought it	Urban/suburban apartment	4 or more kinds of tasks	>1 - 3 hours	>30 commands	4 or more activities	3 - 8 hours	No
dog757	Healthy	Female	109	8 - 10	58	20	Pure	Intact	No	>1 - 3 hours	Normal (BCS 3)	Raw food	Regularly (daily)	No	None	No	Female	30 - 39 years	Dogs are my hobby/profession	Two or more	Three people	No	7 - 12 weeks	Born at my place/bought it	Fenced garden	4 or more kinds of tasks	30 mins - 1 hour	>30 commands	2 - 3 activities	3 - 8 hours	No
dog758	Unhealthy	Male	46	3 - 6	64	36	Pure	Neutered	No	>1 - 3 hours	Normal (BCS 3)	Dry food only	Rarely	Yes	other disorders	No	Female	40 - 49 years	I have had a dog before	One	Four or more people	No	Less than 7 weeks	Got as a present	House with garden/non fenced area	4 or more kinds of tasks	>1 - 3 hours	11 - 30 commands	4 or more activities	1 - 2 hours	No
dog760	Unhealthy	Male	66	3 - 6	57	24	Mixed	Neutered	No	>3 - 7 hours	Normal (BCS 3)	Mixed	Often	Yes	joint problems	No	Female	30 - 39 years	Dogs are my hobby/profession	One	Four or more people	No	Less than 7 weeks	Got as a present	Urban/suburban apartment	4 or more kinds of tasks	>1 - 3 hours	>30 commands	4 or more activities	1 - 2 hours	No
dog761	Healthy	Female	61	3 - 6	30	13	Mixed	Neutered	No	>3 - 7 hours	Over-weight (BCS 4-5)	Mixed	Almost never	No	None	No	Female	<29 years	I have never had a dog before	None	Four or more people	No	Less than 7 weeks	Got as a present	Urban/suburban apartment	3 kinds of tasks	more than 3 hours	<10 commands	One activity	1 - 2 hours	No
dog762	Healthy	Female	86	6 - 8	30	24	Mixed	Neutered	No	More than 7 hours	Over-weight (BCS 4-5)	Cooked food	Rarely	Yes	None	No	Female	30 - 39 years	I have never had a dog before	None	One person	No	More than a year	Found it/shelter	Urban/suburban apartment	3 kinds of tasks	more than 3 hours	11 - 30 commands	2 - 3 activities	More than 8 hours	No
dog764	Healthy	Male	21	1 - 3	65	42	Pure	Intact	No	>1 - 3 hours	Normal (BCS 3)	Tinned and dry food	Rarely	No	None	No	Female	40 - 49 years	Dogs are my hobby/profession	Two or more	Three people	Yes	3 - 12 months	Born at my place/bought it	Fenced garden	4 or more kinds of tasks	>1 - 3 hours	11 - 30 commands	4 or more activities	3 - 8 hours	No
dog765	Healthy	Male	62	3 - 6	60	38	Pure	Neutered	No	>3 - 7 hours	Normal (BCS 3)	Dry food only	Rarely	No	None	No	Female	>50 years	I have had a dog before	One	Two people	No	7 - 12 weeks	Got as a present	House with garden/non fenced area	4 or more kinds of tasks	>1 - 3 hours	11 - 30 commands	2 - 3 activities	3 - 8 hours	No
dog767	Healthy	Male	23	1 - 3	50	20	Mixed	Neutered	No	30 mins - 1 hour	Normal (BCS 3)	Mixed	Almost never	No	None	No	Female	<29 years	I have had a dog before	None	Three people	No	3 - 12 months	Found it/shelter	Fenced garden	4 or more kinds of tasks	30 mins - 1 hour	<10 commands	2 - 3 activities	3 - 8 hours	No
dog768	Healthy	Female	27	1 - 3	30	25	Pure	Intact	No	More than 7 hours	Normal (BCS 3)	Dry food only	Rarely	Yes	None	No	Male	<29 years	I have never had a dog before	Two or more	Three people	Yes	7 - 12 weeks	Born at my place/bought it	Fenced garden	4 or more kinds of tasks	30 mins - 1 hour	11 - 30 commands	4 or more activities	None	No
dog769	Healthy	Male	45	3 - 6	27	12	Pure	Intact	No	>1 - 3 hours	Normal (BCS 3)	Cooked food	Often	No	None	No	Female	30 - 39 years	I have had a dog before	None	Two people	No	7 - 12 weeks	Born at my place/bought it	Urban/suburban apartment	3 kinds of tasks	>1 - 3 hours	11 - 30 commands	2 - 3 activities	3 - 8 hours	No
dog771	Unhealthy	Female	13	1 - 3	13	7	Mixed	Intact	No	Less than 30 mins	Normal (BCS 3)	Tinned and dry food	Almost never	No	joint problems	No	Female	<29 years	I have had a dog before	One	Two people	Yes	3 - 12 months	Got as a present	Urban/suburban apartment	Maximum a task	30 mins - 1 hour	<10 commands	One activity	More than 8 hours	No
dog772	Unhealthy	Female	182	> 12	30	9	Mixed	Neutered	Yes	>3 - 7 hours	Thin (BCS 1-2)	Tinned and dry food	Rarely	Yes	other disorders	No	Female	30 - 39 years	I have never had a dog before	One	Four or more people	Yes	3 - 12 months	Got as a present	Urban/suburban apartment	3 kinds of tasks	Less than 30 mins	<10 commands	One activity	1 - 2 hours	No
dog773	Unhealthy	Male	108	8 - 10	60	25	Pure	Neutered	Yes	>1 - 3 hours	Thin (BCS 1-2)	Dry food only	Almost never	Yes	joint problems	No	Female	<29 years	I have had a dog before	None	Two people	Yes	More than a year	Found it/shelter	Urban/suburban apartment	3 kinds of tasks	>1 - 3 hours	<10 commands	One activity	3 - 8 hours	No
dog774	Unhealthy	Male	77	6 - 8	40	19	Pure	Intact	No	>3 - 7 hours	Normal (BCS 3)	Dry food only	Almost never	No	other disorders	No	Female	30 - 39 years	I have had a dog before	None	One person	No	7 - 12 weeks	Born at my place/bought it	Urban/suburban apartment	Maximum a task	more than 3 hours	<10 commands	2 - 3 activities	3 - 8 hours	No
dog775	Unhealthy	Female	122	10 - 12	30	22	Pure	Neutered	No	>1 - 3 hours	Normal (BCS 3)	Dry food only	Rarely	Yes	joint problems	No	Female	30 - 39 years	Dogs are my hobby/profession	Two or more	One person	No	More than a year	Born at my place/bought it	Urban/suburban apartment	2 kinds of tasks	30 mins - 1 hour	<10 commands	One activity	3 - 8 hours	Yes
dog776	Healthy	Female	151	> 12	30	10	Pure	Intact	No	>3 - 7 hours	Normal (BCS 3)	Tinned and dry food	Almost never	No	None	No	Female	<29 years	I have had a dog before	One	Four or more people	No	7 - 12 weeks	Born at my place/bought it	Urban/suburban apartment	3 kinds of tasks	30 mins - 1 hour	<10 commands	2 - 3 activities	1 - 2 hours	Yes
dog777	Unhealthy	Male	111	8 - 10	40	13	Mixed	Intact	No	More than 7 hours	Over-weight (BCS 4-5)	Raw food	Almost never	Yes	tooth problems	No	Male	<29 years	Dogs are my hobby/profession	Two or more	Four or more people	No	Less than 7 weeks	Born at my place/bought it	Fenced garden	2 kinds of tasks	>1 - 3 hours	<10 commands	One activity	3 - 8 hours	No
dog778	Unhealthy	Female	94	6 - 8	40	19	Mixed	Neutered	No	Less than 30 mins	Normal (BCS 3)	Dry food only	Rarely	Yes	other disorders	No	Female	40 - 49 years	I have had a dog before	One	Two people	Yes	More than a year	Found it/shelter	Urban/suburban apartment	Maximum a task	Less than 30 mins	<10 commands	One activity	3 - 8 hours	No
dog779	Healthy	Male	19	1 - 3	30	4	Pure	Neutered	No	30 mins - 1 hour	Thin (BCS 1-2)	Tinned and dry food	Almost never	No	None	No	Female	30 - 39 years	I have had a dog before	None	Four or more people	Yes	7 - 12 weeks	Born at my place/bought it	Urban/suburban apartment	2 kinds of tasks	>1 - 3 hours	<10 commands	2 - 3 activities	3 - 8 hours	No
dog780	Unhealthy	Female	15	1 - 3	28	11	Pure	Neutered	No	30 mins - 1 hour	Normal (BCS 3)	Raw food	Rarely	No	joint problems	No	Female	<29 years	I have had a dog before	One	Two people	No	7 - 12 weeks	Born at my place/bought it	Urban/suburban apartment	3 kinds of tasks	>1 - 3 hours	<10 commands	2 - 3 activities	3 - 8 hours	No
dog781	Unhealthy	Male	159	> 12	58	30	Pure	Neutered	No	30 mins - 1 hour	Thin (BCS 1-2)	Tinned and dry food	Rarely	No	tooth problems	Yes	Female	30 - 39 years	Dogs are my hobby/profession	One	Three people	Yes	7 - 12 weeks	Born at my place/bought it	Urban/suburban apartment	4 or more kinds of tasks	>1 - 3 hours	11 - 30 commands	One activity	More than 8 hours	Yes
dog782	Unhealthy	Male	192	> 12	40	8	Pure	Intact	Yes	More than 7 hours	Thin (BCS 1-2)	Mixed	Almost never	Yes	joint problems + tooth problems	No	Female	<29 years	I have had a dog before	One	Four or more people	No	More than a year	Found it/shelter	Fenced garden	2 kinds of tasks	>1 - 3 hours	<10 commands	One activity	3 - 8 hours	No
dog783	Unhealthy	Female	147	> 12	27	5	Pure	Neutered	No	>1 - 3 hours	Normal (BCS 3)	Cooked food	Often	No	joint problems + tooth problems	No	Female	>50 years	I have had a dog before	One	Two people	No	7 - 12 weeks	Born at my place/bought it	House with garden/non fenced area	Maximum a task	>1 - 3 hours	>30 commands	One activity	3 - 8 hours	Yes
dog786	Unhealthy	Female	96	8 - 10	50	9	Mixed	Neutered	No	30 mins - 1 hour	Normal (BCS 3)	Cooked food	Almost never	Yes	tooth problems	Yes	Female	30 - 39 years	Dogs are my hobby/profession	None	Two people	No	Less than 7 weeks	Found it/shelter	Urban/suburban apartment	3 kinds of tasks	30 mins - 1 hour	11 - 30 commands	2 - 3 activities	1 - 2 hours	Yes
dog787	Unhealthy	Male	61	3 - 6	33	12	Pure	Intact	No	Less than 30 mins	Over-weight (BCS 4-5)	Raw food	Regularly (daily)	No	joint problems	Yes	Male	<29 years	I have never had a dog before	None	Three people	No	7 - 12 weeks	Born at my place/bought it	Urban/suburban apartment	2 kinds of tasks	>1 - 3 hours	<10 commands	2 - 3 activities	1 - 2 hours	No
dog788	Unhealthy	Male	80	6 - 8	75	50	Pure	Intact	Yes	More than 7 hours	Over-weight (BCS 4-5)	Cooked food	Often	No	other disorders	No	Female	40 - 49 years	I have had a dog before	One	Four or more people	No	Less than 7 weeks	Born at my place/bought it	Urban/suburban apartment	4 or more kinds of tasks	more than 3 hours	>30 commands	One activity	None	No
dog789	Healthy	Male	85	6 - 8	69	35	Pure	Intact	No	More than 7 hours	Normal (BCS 3)	Dry food only	Regularly (daily)	No	None	No	Female	<29 years	Dogs are my hobby/profession	None	Three people	No	7 - 12 weeks	Born at my place/bought it	Fenced garden	4 or more kinds of tasks	>1 - 3 hours	11 - 30 commands	4 or more activities	3 - 8 hours	No
dog790	Healthy	Female	19	1 - 3	58	25	Mixed	Neutered	No	>1 - 3 hours	Normal (BCS 3)	Cooked food	Regularly (daily)	Yes	None	No	Female	30 - 39 years	Dogs are my hobby/profession	One	One person	No	More than a year	Found it/shelter	Urban/suburban apartment	3 kinds of tasks	>1 - 3 hours	<10 commands	2 - 3 activities	3 - 8 hours	Yes
dog791	Unhealthy	Male	144	> 12	20	5	Pure	Intact	No	Less than 30 mins	Normal (BCS 3)	Dry food only	Rarely	No	joint problems + tooth problems	No	Female	<29 years	I have had a dog before	One	One person	No	3 - 12 months	Born at my place/bought it	Urban/suburban apartment	4 or more kinds of tasks	>1 - 3 hours	<10 commands	2 - 3 activities	3 - 8 hours	No
dog793	Healthy	Female	12	1 - 3	25	2	Pure	Intact	No	30 mins - 1 hour	Normal (BCS 3)	Tinned and dry food	Almost never	No	None	No	Female	<29 years	I have had a dog before	None	Two people	No	7 - 12 weeks	Got as a present	Urban/suburban apartment	4 or more kinds of tasks	30 mins - 1 hour	<10 commands	4 or more activities	3 - 8 hours	No
dog794	Unhealthy	Male	144	> 12	42	19	Pure	Neutered	Yes	>3 - 7 hours	Over-weight (BCS 4-5)	Cooked food	Almost never	Yes	tooth problems	No	Female	>50 years	I have had a dog before	One	Two people	No	More than a year	Found it/shelter	House with garden/non fenced area	Maximum a task	Less than 30 mins	<10 commands	One activity	3 - 8 hours	No
dog795	Unhealthy	Male	61	3 - 6	42	13	Mixed	Neutered	Yes	30 mins - 1 hour	Over-weight (BCS 4-5)	Raw food	Almost never	Yes	joint problems + tooth problems	No	Female	<29 years	I have never had a dog before	None	Three people	No	More than a year	Found it/shelter	Urban/suburban apartment	4 or more kinds of tasks	more than 3 hours	11 - 30 commands	4 or more activities	None	Yes
dog796	Healthy	Male	52	3 - 6	50	40	Mixed	Intact	No	More than 7 hours	Normal (BCS 3)	Mixed	Rarely	No	None	No	Male	<29 years	I have had a dog before	None	Three people	No	7 - 12 weeks	Got as a present	Fenced garden	3 kinds of tasks	Less than 30 mins	<10 commands	2 - 3 activities	3 - 8 hours	No
dog797	Unhealthy	Female	130	10 - 12	80	42	Pure	Neutered	No	>1 - 3 hours	Normal (BCS 3)	Dry food only	Regularly (daily)	No	joint problems	No	Female	40 - 49 years	I have had a dog before	Two or more	Two people	No	3 - 12 months	Found it/shelter	Urban/suburban apartment	4 or more kinds of tasks	>1 - 3 hours	11 - 30 commands	One activity	3 - 8 hours	No
dog798	Healthy	Male	18	1 - 3	45	30	Pure	Intact	No	Less than 30 mins	Normal (BCS 3)	Mixed	Rarely	No	None	No	Male	<29 years	I have had a dog before	One	Four or more people	Yes	3 - 12 months	Born at my place/bought it	Fenced garden	3 kinds of tasks	>1 - 3 hours	<10 commands	2 - 3 activities	3 - 8 hours	Yes
dog799	Unhealthy	Male	58	3 - 6	30	15	Pure	Intact	No	>1 - 3 hours	Normal (BCS 3)	Mixed	Rarely	Yes	tooth problems	No	Female	<29 years	Dogs are my hobby/profession	None	Two people	No	Less than 7 weeks	Born at my place/bought it	Urban/suburban apartment	4 or more kinds of tasks	more than 3 hours	11 - 30 commands	2 - 3 activities	3 - 8 hours	Yes
dog800	Healthy	Female	17	1 - 3	25	3	Pure	Intact	No	>1 - 3 hours	Over-weight (BCS 4-5)	Cooked food	Rarely	No	None	No	Female	<29 years	I have never had a dog before	One	Three people	Yes	7 - 12 weeks	Born at my place/bought it	Urban/suburban apartment	4 or more kinds of tasks	more than 3 hours	11 - 30 commands	One activity	3 - 8 hours	No
dog801	Unhealthy	Female	74	6 - 8	30	7	Mixed	Neutered	No	>1 - 3 hours	Normal (BCS 3)	Raw food	Regularly (daily)	No	joint problems	No	Female	<29 years	Dogs are my hobby/profession	None	Three people	No	7 - 12 weeks	Born at my place/bought it	Urban/suburban apartment	4 or more kinds of tasks	more than 3 hours	11 - 30 commands	2 - 3 activities	1 - 2 hours	No
dog802	Unhealthy	Female	108	8 - 10	20	11	Pure	Neutered	Yes	>1 - 3 hours	Normal (BCS 3)	Cooked food	Rarely	No	tooth problems	Yes	Female	30 - 39 years	Dogs are my hobby/profession	One	Two people	No	Less than 7 weeks	Born at my place/bought it	Urban/suburban apartment	4 or more kinds of tasks	>1 - 3 hours	>30 commands	4 or more activities	1 - 2 hours	Yes
dog803	Healthy	Female	87	6 - 8	50	35	Pure	Neutered	No	>1 - 3 hours	Normal (BCS 3)	Cooked food	Rarely	Yes	None	No	Female	>50 years	I have had a dog before	One	Two people	Yes	More than a year	Got as a present	House with garden/non fenced area	3 kinds of tasks	>1 - 3 hours	11 - 30 commands	2 - 3 activities	1 - 2 hours	No
dog804	Unhealthy	Male	143	10 - 12	50	38	Pure	Intact	No	30 mins - 1 hour	Normal (BCS 3)	Cooked food	Regularly (daily)	No	joint problems	Yes	Male	30 - 39 years	I have had a dog before	None	Three people	No	7 - 12 weeks	Born at my place/bought it	Fenced garden	4 or more kinds of tasks	more than 3 hours	11 - 30 commands	2 - 3 activities	1 - 2 hours	Yes
dog805	Unhealthy	Male	104	8 - 10	17	2	Pure	Intact	No	Less than 30 mins	Normal (BCS 3)	Cooked food	Often	Yes	joint problems + tooth problems	Yes	Female	30 - 39 years	I have had a dog before	One	Three people	Yes	Less than 7 weeks	Born at my place/bought it	Urban/suburban apartment	3 kinds of tasks	>1 - 3 hours	11 - 30 commands	2 - 3 activities	1 - 2 hours	Yes
dog806	Unhealthy	Female	59	3 - 6	22	7	Pure	Neutered	Yes	Less than 30 mins	Normal (BCS 3)	Mixed	Rarely	No	tooth problems	Yes	Female	<29 years	I have had a dog before	None	Two people	No	Less than 7 weeks	Born at my place/bought it	Urban/suburban apartment	3 kinds of tasks	>1 - 3 hours	<10 commands	2 - 3 activities	3 - 8 hours	Yes
dog807	Healthy	Female	85	6 - 8	70	35	Pure	Intact	No	More than 7 hours	Normal (BCS 3)	Mixed	Rarely	Yes	None	No	Female	>50 years	I have had a dog before	None	Three people	Yes	Less than 7 weeks	Born at my place/bought it	Urban/suburban apartment	4 or more kinds of tasks	Less than 30 mins	<10 commands	2 - 3 activities	3 - 8 hours	No
dog808	Unhealthy	Female	122	10 - 12	30	13	Pure	Intact	Yes	>1 - 3 hours	Over-weight (BCS 4-5)	Tinned and dry food	Rarely	Yes	joint problems	No	Female	<29 years	I have had a dog before	One	Two people	No	More than a year	Found it/shelter	Urban/suburban apartment	3 kinds of tasks	30 mins - 1 hour	<10 commands	One activity	More than 8 hours	No
dog809	Healthy	Female	43	3 - 6	40	20	Mixed	Intact	No	>3 - 7 hours	Over-weight (BCS 4-5)	Tinned and dry food	Rarely	No	None	No	Female	<29 years	I have had a dog before	None	Three people	Yes	7 - 12 weeks	Got as a present	Urban/suburban apartment	2 kinds of tasks	>1 - 3 hours	<10 commands	2 - 3 activities	None	No
dog810	Unhealthy	Female	105	8 - 10	50	35	Mixed	Intact	No	>1 - 3 hours	Over-weight (BCS 4-5)	Cooked food	Often	No	joint problems	Yes	Female	>50 years	I have never had a dog before	One	Two people	No	More than a year	Found it/shelter	House with garden/non fenced area	4 or more kinds of tasks	>1 - 3 hours	11 - 30 commands	2 - 3 activities	1 - 2 hours	No
dog811	Unhealthy	Male	134	10 - 12	25	17	Mixed	Neutered	No	More than 7 hours	Over-weight (BCS 4-5)	Mixed	Often	Yes	joint problems	No	Female	40 - 49 years	I have never had a dog before	One	Three people	Yes	3 - 12 months	Found it/shelter	Fenced garden	4 or more kinds of tasks	30 mins - 1 hour	<10 commands	One activity	3 - 8 hours	No
dog812	Unhealthy	Male	173	> 12	32	6	Pure	Neutered	Yes	Less than 30 mins	Normal (BCS 3)	Cooked food	Almost never	No	joint problems + tooth problems	Yes	Female	>50 years	I have had a dog before	None	Two people	No	7 - 12 weeks	Born at my place/bought it	Urban/suburban apartment	2 kinds of tasks	30 mins - 1 hour	<10 commands	2 - 3 activities	3 - 8 hours	Yes
dog813	Unhealthy	Male	196	> 12	15	3	Pure	Neutered	Yes	Less than 30 mins	Thin (BCS 1-2)	Cooked food	Regularly (daily)	No	joint problems	No	Female	30 - 39 years	Dogs are my hobby/profession	Two or more	Two people	No	7 - 12 weeks	Got as a present	Urban/suburban apartment	Maximum a task	30 mins - 1 hour	<10 commands	One activity	3 - 8 hours	Yes
dog814	Unhealthy	Female	150	> 12	45	21	Mixed	Neutered	No	30 mins - 1 hour	Thin (BCS 1-2)	Raw food	Often	Yes	joint problems	No	Female	30 - 39 years	I have had a dog before	One	Two people	No	More than a year	Found it/shelter	Fenced garden	4 or more kinds of tasks	30 mins - 1 hour	<10 commands	2 - 3 activities	1 - 2 hours	No
dog817	Healthy	Male	78	6 - 8	25	9	Pure	Intact	No	30 mins - 1 hour	Normal (BCS 3)	Tinned and dry food	Almost never	No	None	No	Female	>50 years	I have never had a dog before	None	Two people	No	More than a year	Born at my place/bought it	Urban/suburban apartment	3 kinds of tasks	>1 - 3 hours	<10 commands	2 - 3 activities	3 - 8 hours	No
dog818	Healthy	Female	85	6 - 8	25	11	Pure	Intact	No	More than 7 hours	Over-weight (BCS 4-5)	Mixed	Almost never	Yes	None	No	Female	40 - 49 years	I have never had a dog before	One	Four or more people	Yes	7 - 12 weeks	Got as a present	Fenced garden	Maximum a task	30 mins - 1 hour	<10 commands	One activity	3 - 8 hours	No
dog819	Unhealthy	Female	29	1 - 3	30	9	Pure	Intact	No	>3 - 7 hours	Normal (BCS 3)	Cooked food	Almost never	No	joint problems	No	Female	40 - 49 years	I have had a dog before	One	Four or more people	Yes	7 - 12 weeks	Got as a present	House with garden/non fenced area	4 or more kinds of tasks	more than 3 hours	11 - 30 commands	4 or more activities	1 - 2 hours	No
dog821	Unhealthy	Female	146	> 12	15	9	Pure	Intact	Yes	Less than 30 mins	Over-weight (BCS 4-5)	Tinned and dry food	Regularly (daily)	No	joint problems	No	Female	>50 years	I have never had a dog before	One	One person	No	Less than 7 weeks	Born at my place/bought it	Urban/suburban apartment	Maximum a task	>1 - 3 hours	<10 commands	One activity	More than 8 hours	No
dog822	Unhealthy	Male	132	10 - 12	30	11	Mixed	Intact	No	30 mins - 1 hour	Normal (BCS 3)	Dry food only	Often	Yes	tooth problems	No	Female	30 - 39 years	I have had a dog before	One	Two people	No	More than a year	Found it/shelter	Fenced garden	4 or more kinds of tasks	30 mins - 1 hour	<10 commands	One activity	More than 8 hours	No
dog823	Unhealthy	Male	20	1 - 3	22	3	Pure	Intact	No	30 mins - 1 hour	Normal (BCS 3)	Cooked food	Often	No	tooth problems	No	Female	<29 years	Dogs are my hobby/profession	None	Four or more people	No	7 - 12 weeks	Got as a present	Urban/suburban apartment	4 or more kinds of tasks	30 mins - 1 hour	<10 commands	4 or more activities	1 - 2 hours	No
dog824	Unhealthy	Female	102	8 - 10	35	12	Pure	Neutered	No	>1 - 3 hours	Over-weight (BCS 4-5)	Dry food only	Almost never	Yes	tooth problems	No	Female	>50 years	I have had a dog before	One	Four or more people	Yes	More than a year	Found it/shelter	Urban/suburban apartment	4 or more kinds of tasks	30 mins - 1 hour	<10 commands	4 or more activities	3 - 8 hours	Yes
dog825	Healthy	Female	54	3 - 6	30	15	Pure	Neutered	No	>1 - 3 hours	Normal (BCS 3)	Tinned and dry food	Rarely	Yes	None	No	Female	30 - 39 years	I have had a dog before	One	Two people	No	More than a year	Found it/shelter	Urban/suburban apartment	4 or more kinds of tasks	>1 - 3 hours	<10 commands	2 - 3 activities	3 - 8 hours	Yes
dog826	Unhealthy	Male	46	3 - 6	60	55	Pure	Intact	No	>1 - 3 hours	Thin (BCS 1-2)	Raw food	Regularly (daily)	No	other disorders	No	Female	30 - 39 years	I have had a dog before	None	One person	No	7 - 12 weeks	Born at my place/bought it	Urban/suburban apartment	4 or more kinds of tasks	more than 3 hours	11 - 30 commands	4 or more activities	3 - 8 hours	No
dog827	Healthy	Male	63	3 - 6	63	21	Pure	Intact	No	30 mins - 1 hour	Normal (BCS 3)	Cooked food	Often	No	None	No	Male	30 - 39 years	Dogs are my hobby/profession	None	Two people	No	Less than 7 weeks	Born at my place/bought it	Fenced garden	4 or more kinds of tasks	>1 - 3 hours	>30 commands	4 or more activities	1 - 2 hours	Yes
dog828	Unhealthy	Male	55	3 - 6	55	40	Mixed	Neutered	No	>1 - 3 hours	Normal (BCS 3)	Mixed	Often	Yes	joint problems	No	Female	40 - 49 years	Dogs are my hobby/profession	None	Three people	Yes	3 - 12 months	Found it/shelter	Fenced garden	2 kinds of tasks	30 mins - 1 hour	11 - 30 commands	2 - 3 activities	3 - 8 hours	No
dog829	Healthy	Female	27	1 - 3	20	2	Pure	Intact	No	More than 7 hours	Normal (BCS 3)	Cooked food	Often	No	None	No	Female	>50 years	I have had a dog before	Two or more	Three people	No	7 - 12 weeks	Got as a present	Fenced garden	4 or more kinds of tasks	more than 3 hours	11 - 30 commands	4 or more activities	1 - 2 hours	No
dog830	Unhealthy	Female	173	> 12	50	23	Mixed	Neutered	Yes	More than 7 hours	Normal (BCS 3)	Cooked food	Often	No	other disorders	No	Female	<29 years	I have had a dog before	Two or more	Four or more people	No	7 - 12 weeks	Born at my place/bought it	Fenced garden	3 kinds of tasks	30 mins - 1 hour	<10 commands	One activity	1 - 2 hours	Yes
dog832	Healthy	Male	73	6 - 8	20	2	Pure	Intact	No	>1 - 3 hours	Normal (BCS 3)	Tinned and dry food	Rarely	No	None	No	Female	>50 years	Dogs are my hobby/profession	One	Two people	No	7 - 12 weeks	Got as a present	Urban/suburban apartment	3 kinds of tasks	30 mins - 1 hour	<10 commands	One activity	1 - 2 hours	No
dog835	Healthy	Female	17	1 - 3	50	20	Pure	Intact	No	More than 7 hours	Normal (BCS 3)	Dry food only	Rarely	No	None	No	Female	<29 years	I have never had a dog before	None	Three people	Yes	Less than 7 weeks	Got as a present	Fenced garden	4 or more kinds of tasks	>1 - 3 hours	<10 commands	2 - 3 activities	3 - 8 hours	No
dog836	Unhealthy	Female	122	10 - 12	55	45	Pure	Intact	No	>1 - 3 hours	Over-weight (BCS 4-5)	Mixed	Often	No	joint problems + tooth problems	No	Female	<29 years	I have had a dog before	One	Four or more people	No	7 - 12 weeks	Born at my place/bought it	Fenced garden	3 kinds of tasks	30 mins - 1 hour	11 - 30 commands	One activity	3 - 8 hours	No
dog837	Unhealthy	Female	158	> 12	30	8	Pure	Intact	No	Less than 30 mins	Normal (BCS 3)	Tinned and dry food	Regularly (daily)	No	joint problems + tooth problems	No	Female	>50 years	I have had a dog before	One	One person	No	7 - 12 weeks	Born at my place/bought it	Urban/suburban apartment	2 kinds of tasks	30 mins - 1 hour	<10 commands	One activity	3 - 8 hours	No
dog838	Unhealthy	Male	38	3 - 6	45	11	Pure	Intact	No	Less than 30 mins	Over-weight (BCS 4-5)	Tinned and dry food	Often	Yes	joint problems	No	Female	40 - 49 years	I have had a dog before	One	Two people	Yes	Less than 7 weeks	Born at my place/bought it	Urban/suburban apartment	4 or more kinds of tasks	Less than 30 mins	<10 commands	One activity	None	No
dog839	Unhealthy	Female	158	> 12	30	8	Pure	Neutered	No	Less than 30 mins	Thin (BCS 1-2)	Tinned and dry food	Regularly (daily)	No	joint problems + tooth problems	Yes	Female	>50 years	I have had a dog before	One	One person	No	7 - 12 weeks	Born at my place/bought it	Urban/suburban apartment	2 kinds of tasks	>1 - 3 hours	<10 commands	One activity	1 - 2 hours	No
dog840	Healthy	Male	83	6 - 8	29	12	Pure	Intact	No	>3 - 7 hours	Normal (BCS 3)	Raw food	Regularly (daily)	No	None	No	Female	>50 years	Dogs are my hobby/profession	One	Three people	No	7 - 12 weeks	Got as a present	Urban/suburban apartment	4 or more kinds of tasks	>1 - 3 hours	11 - 30 commands	One activity	3 - 8 hours	No
dog841	Unhealthy	Female	112	8 - 10	50	18	Pure	Intact	No	>3 - 7 hours	Normal (BCS 3)	Mixed	Rarely	No	tooth problems	No	Female	30 - 39 years	Dogs are my hobby/profession	One	Two people	No	7 - 12 weeks	Born at my place/bought it	Fenced garden	4 or more kinds of tasks	more than 3 hours	11 - 30 commands	2 - 3 activities	None	No
dog842	Healthy	Female	40	3 - 6	40	12	Mixed	Neutered	No	More than 7 hours	Thin (BCS 1-2)	Mixed	Almost never	Yes	None	No	Female	30 - 39 years	I have had a dog before	None	Four or more people	Yes	7 - 12 weeks	Found it/shelter	Fenced garden	3 kinds of tasks	30 mins - 1 hour	<10 commands	2 - 3 activities	3 - 8 hours	No
dog843	Healthy	Female	24	1 - 3	40	30	Pure	Intact	No	More than 7 hours	Normal (BCS 3)	Raw food	Almost never	Yes	None	No	Female	30 - 39 years	I have had a dog before	None	Two people	No	7 - 12 weeks	Born at my place/bought it	Fenced garden	4 or more kinds of tasks	30 mins - 1 hour	11 - 30 commands	2 - 3 activities	More than 8 hours	Yes
dog844	Unhealthy	Female	25	1 - 3	33	6	Mixed	Neutered	No	30 mins - 1 hour	Normal (BCS 3)	Cooked food	Regularly (daily)	Yes	joint problems	Yes	Female	<29 years	I have never had a dog before	None	Four or more people	No	3 - 12 months	Got as a present	House with garden/non fenced area	4 or more kinds of tasks	>1 - 3 hours	<10 commands	2 - 3 activities	1 - 2 hours	Yes
dog845	Unhealthy	Female	111	8 - 10	27	7	Pure	Neutered	No	30 mins - 1 hour	Thin (BCS 1-2)	Mixed	Regularly (daily)	Yes	joint problems	Yes	Female	<29 years	Dogs are my hobby/profession	Two or more	Two people	No	Less than 7 weeks	Born at my place/bought it	Urban/suburban apartment	4 or more kinds of tasks	>1 - 3 hours	11 - 30 commands	4 or more activities	3 - 8 hours	No
dog846	Unhealthy	Male	56	3 - 6	30	9	Pure	Neutered	No	>3 - 7 hours	Normal (BCS 3)	Cooked food	Regularly (daily)	No	joint problems	No	Female	>50 years	I have never had a dog before	One	Two people	No	7 - 12 weeks	Born at my place/bought it	Urban/suburban apartment	4 or more kinds of tasks	>1 - 3 hours	11 - 30 commands	2 - 3 activities	1 - 2 hours	No
dog847	Unhealthy	Female	166	> 12	30	6	Mixed	Neutered	Yes	30 mins - 1 hour	Thin (BCS 1-2)	Raw food	Regularly (daily)	No	tooth problems	No	Female	30 - 39 years	Dogs are my hobby/profession	Two or more	Two people	No	7 - 12 weeks	Got as a present	Urban/suburban apartment	3 kinds of tasks	30 mins - 1 hour	<10 commands	One activity	3 - 8 hours	No
dog848	Unhealthy	Male	180	> 12	20	12	Mixed	Intact	Yes	>1 - 3 hours	Normal (BCS 3)	Mixed	Rarely	No	joint problems	No	Female	>50 years	I have had a dog before	Two or more	Two people	No	7 - 12 weeks	Got as a present	Fenced garden	Maximum a task	30 mins - 1 hour	<10 commands	One activity	1 - 2 hours	No
dog849	Unhealthy	Male	150	> 12	40	40	Pure	Intact	Yes	>3 - 7 hours	Normal (BCS 3)	Tinned and dry food	Regularly (daily)	Yes	joint problems	Yes	Female	>50 years	I have had a dog before	None	Two people	No	Less than 7 weeks	Born at my place/bought it	Urban/suburban apartment	4 or more kinds of tasks	more than 3 hours	>30 commands	One activity	3 - 8 hours	Yes
dog850	Unhealthy	Male	115	8 - 10	55	31	Pure	Intact	Yes	>1 - 3 hours	Over-weight (BCS 4-5)	Raw food	Regularly (daily)	No	other disorders	No	Female	30 - 39 years	Dogs are my hobby/profession	Two or more	One person	No	7 - 12 weeks	Born at my place/bought it	Urban/suburban apartment	4 or more kinds of tasks	>1 - 3 hours	11 - 30 commands	4 or more activities	3 - 8 hours	Yes
dog851	Healthy	Female	25	1 - 3	45	25	Pure	Neutered	No	30 mins - 1 hour	Normal (BCS 3)	Raw food	Regularly (daily)	No	None	Yes	Female	<29 years	I have never had a dog before	One	Four or more people	No	7 - 12 weeks	Got as a present	Urban/suburban apartment	4 or more kinds of tasks	>1 - 3 hours	>30 commands	4 or more activities	3 - 8 hours	No
dog852	Unhealthy	Male	38	3 - 6	30	15	Mixed	Intact	No	30 mins - 1 hour	Thin (BCS 1-2)	Raw food	Rarely	No	other disorders	No	Female	<29 years	I have had a dog before	None	Four or more people	No	3 - 12 months	Got as a present	Urban/suburban apartment	3 kinds of tasks	>1 - 3 hours	<10 commands	2 - 3 activities	3 - 8 hours	No
dog853	Healthy	Female	50	3 - 6	50	25	Mixed	Neutered	No	>1 - 3 hours	Thin (BCS 1-2)	Raw food	Regularly (daily)	No	None	No	Female	30 - 39 years	Dogs are my hobby/profession	Two or more	Two people	No	7 - 12 weeks	Born at my place/bought it	Urban/suburban apartment	4 or more kinds of tasks	>1 - 3 hours	11 - 30 commands	4 or more activities	3 - 8 hours	Yes
dog854	Unhealthy	Male	72	6 - 8	60	30	Mixed	Neutered	No	30 mins - 1 hour	Thin (BCS 1-2)	Raw food	Regularly (daily)	Yes	other disorders	No	Female	30 - 39 years	Dogs are my hobby/profession	Two or more	Two people	No	More than a year	Found it/shelter	Urban/suburban apartment	Maximum a task	30 mins - 1 hour	<10 commands	One activity	3 - 8 hours	Yes
dog855	Unhealthy	Male	15	1 - 3	25	4	Pure	Intact	No	Less than 30 mins	Normal (BCS 3)	Dry food only	Often	No	joint problems	No	Female	<29 years	I have never had a dog before	None	Two people	No	7 - 12 weeks	Born at my place/bought it	Urban/suburban apartment	2 kinds of tasks	>1 - 3 hours	<10 commands	2 - 3 activities	3 - 8 hours	No
dog856	Unhealthy	Female	50	3 - 6	25	6	Pure	Neutered	Yes	30 mins - 1 hour	Normal (BCS 3)	Tinned and dry food	Almost never	Yes	tooth problems	No	Female	30 - 39 years	Dogs are my hobby/profession	One	Two people	No	More than a year	Got as a present	Urban/suburban apartment	3 kinds of tasks	30 mins - 1 hour	<10 commands	One activity	3 - 8 hours	No
dog857	Unhealthy	Male	73	6 - 8	30	17	Mixed	Neutered	No	>1 - 3 hours	Normal (BCS 3)	Tinned and dry food	Often	No	joint problems	No	Male	30 - 39 years	I have had a dog before	One	Two people	No	7 - 12 weeks	Got as a present	Urban/suburban apartment	4 or more kinds of tasks	>1 - 3 hours	11 - 30 commands	2 - 3 activities	3 - 8 hours	No
dog859	Unhealthy	Male	59	3 - 6	25	6	Mixed	Neutered	No	30 mins - 1 hour	Normal (BCS 3)	Cooked food	Regularly (daily)	No	tooth problems	No	Female	30 - 39 years	I have had a dog before	One	One person	No	Less than 7 weeks	Got as a present	Urban/suburban apartment	4 or more kinds of tasks	more than 3 hours	>30 commands	4 or more activities	3 - 8 hours	No
dog860	Unhealthy	Female	55	3 - 6	22	8	Mixed	Neutered	No	>1 - 3 hours	Normal (BCS 3)	Tinned and dry food	Often	Yes	other disorders	No	Female	30 - 39 years	I have never had a dog before	One	Two people	No	3 - 12 months	Found it/shelter	Urban/suburban apartment	4 or more kinds of tasks	more than 3 hours	11 - 30 commands	2 - 3 activities	3 - 8 hours	No
dog861	Unhealthy	Female	183	> 12	30	6	Pure	Neutered	Yes	Less than 30 mins	Normal (BCS 3)	Cooked food	Rarely	No	joint problems + tooth problems	Yes	Female	>50 years	I have had a dog before	One	Two people	No	7 - 12 weeks	Born at my place/bought it	Urban/suburban apartment	2 kinds of tasks	>1 - 3 hours	<10 commands	One activity	3 - 8 hours	No
dog862	Unhealthy	Female	119	8 - 10	33	9	Pure	Intact	No	30 mins - 1 hour	Normal (BCS 3)	Dry food only	Often	No	joint problems	No	Female	30 - 39 years	I have never had a dog before	One	Three people	Yes	7 - 12 weeks	Born at my place/bought it	Urban/suburban apartment	4 or more kinds of tasks	>1 - 3 hours	11 - 30 commands	2 - 3 activities	1 - 2 hours	No
dog863	Healthy	Female	89	6 - 8	50	8	Pure	Intact	No	More than 7 hours	Normal (BCS 3)	Mixed	Often	Yes	None	No	Female	40 - 49 years	I have had a dog before	None	Two people	No	More than a year	Got as a present	Fenced garden	Maximum a task	>1 - 3 hours	<10 commands	2 - 3 activities	3 - 8 hours	Yes
dog864	Healthy	Male	38	3 - 6	50	6	Mixed	Intact	No	>3 - 7 hours	Normal (BCS 3)	Mixed	Almost never	No	None	No	Female	<29 years	I have had a dog before	One	Four or more people	No	7 - 12 weeks	Got as a present	Fenced garden	Maximum a task	30 mins - 1 hour	<10 commands	One activity	3 - 8 hours	No
dog865	Healthy	Female	120	10 - 12	72	50	Pure	Intact	No	More than 7 hours	Thin (BCS 1-2)	Mixed	Almost never	No	None	No	Female	40 - 49 years	I have had a dog before	None	Four or more people	Yes	Less than 7 weeks	Born at my place/bought it	Fenced garden	3 kinds of tasks	>1 - 3 hours	11 - 30 commands	2 - 3 activities	3 - 8 hours	Yes
dog866	Unhealthy	Male	131	10 - 12	40	14	Mixed	Neutered	Yes	More than 7 hours	Normal (BCS 3)	Cooked food	Rarely	Yes	other disorders	No	Female	40 - 49 years	I have had a dog before	Two or more	One person	No	Less than 7 weeks	Found it/shelter	Urban/suburban apartment	3 kinds of tasks	more than 3 hours	<10 commands	2 - 3 activities	1 - 2 hours	Yes
dog867	Unhealthy	Male	156	> 12	70	40	Pure	Intact	Yes	30 mins - 1 hour	Normal (BCS 3)	Cooked food	Almost never	Yes	joint problems	No	Female	30 - 39 years	Dogs are my hobby/profession	One	One person	Yes	More than a year	Found it/shelter	Fenced garden	2 kinds of tasks	30 mins - 1 hour	<10 commands	One activity	3 - 8 hours	Yes
dog868	Unhealthy	Male	196	> 12	20	17	Pure	Intact	Yes	More than 7 hours	Normal (BCS 3)	Mixed	Rarely	Yes	joint problems	No	Female	<29 years	I have had a dog before	None	Three people	No	7 - 12 weeks	Born at my place/bought it	Fenced garden	3 kinds of tasks	>1 - 3 hours	<10 commands	One activity	3 - 8 hours	Yes
dog869	Unhealthy	Male	123	10 - 12	55	26	Pure	Intact	Yes	>1 - 3 hours	Normal (BCS 3)	Dry food only	Often	No	joint problems	No	Female	30 - 39 years	I have had a dog before	One	Four or more people	Yes	7 - 12 weeks	Born at my place/bought it	Fenced garden	3 kinds of tasks	Less than 30 mins	<10 commands	One activity	1 - 2 hours	No
dog870	Unhealthy	Female	180	> 12	55	30	Pure	Intact	Yes	More than 7 hours	Normal (BCS 3)	Raw food	Rarely	Yes	joint problems	No	Female	40 - 49 years	I have had a dog before	One	Four or more people	Yes	Less than 7 weeks	Born at my place/bought it	Fenced garden	2 kinds of tasks	30 mins - 1 hour	<10 commands	One activity	3 - 8 hours	Yes
dog871	Unhealthy	Male	114	8 - 10	20	3	Pure	Intact	No	30 mins - 1 hour	Normal (BCS 3)	Mixed	Rarely	No	tooth problems	No	Female	30 - 39 years	I have never had a dog before	None	One person	No	7 - 12 weeks	Born at my place/bought it	Urban/suburban apartment	3 kinds of tasks	>1 - 3 hours	<10 commands	One activity	More than 8 hours	No
dog872	Unhealthy	Female	99	8 - 10	60	50	Pure	Neutered	No	30 mins - 1 hour	Over-weight (BCS 4-5)	Raw food	Almost never	No	other disorders	No	Female	40 - 49 years	I have had a dog before	One	Two people	No	More than a year	Found it/shelter	Fenced garden	4 or more kinds of tasks	Less than 30 mins	11 - 30 commands	One activity	3 - 8 hours	Yes
dog873	Healthy	Male	24	1 - 3	65	34	Pure	Neutered	No	More than 7 hours	Over-weight (BCS 4-5)	Mixed	Rarely	No	None	No	Female	30 - 39 years	I have had a dog before	One	Four or more people	Yes	Less than 7 weeks	Born at my place/bought it	Fenced garden	4 or more kinds of tasks	more than 3 hours	11 - 30 commands	2 - 3 activities	3 - 8 hours	No
dog874	Healthy	Male	70	3 - 6	38	11	Pure	Intact	No	30 mins - 1 hour	Normal (BCS 3)	Tinned and dry food	Often	Yes	None	No	Female	30 - 39 years	Dogs are my hobby/profession	One	Two people	No	Less than 7 weeks	Got as a present	Urban/suburban apartment	2 kinds of tasks	>1 - 3 hours	<10 commands	2 - 3 activities	More than 8 hours	No
dog875	Healthy	Female	73	6 - 8	50	27	Mixed	Neutered	No	>3 - 7 hours	Normal (BCS 3)	Cooked food	Often	Yes	None	No	Female	30 - 39 years	I have had a dog before	One	Three people	Yes	7 - 12 weeks	Got as a present	Fenced garden	4 or more kinds of tasks	30 mins - 1 hour	11 - 30 commands	2 - 3 activities	3 - 8 hours	No
[truncated: 431 more rows]
